# Supplementary material for: Antibiotics Alter Pocillopora Coral-Symbiodiniaceae-Bacteria Interactions and Cause Microbial Dysbiosis During Heat Stress
Source: Frontiers journal article supplement (doi:10.3389/fmars.2021.814124), 2022-01-13
Supplement: Data_Sheet_1.DOCX [file Data_Sheet_1.DOCX]

***Supplementary Material***

1. **Supplementary Figures**

**Supplementary Figure 1:** Location of coral collection sites in southern Taiwan. (A) Map depicting the location of Houwan (**後灣** – 22° 2'29" N, 120°41'43" E) and Wanglitung (**萬里桐** –21°59'43" N, 120°42'22" E) reefs. Sites were chosen based on the local abundance of *Pocillopora spp.*, and two coral colonies (genotypes) were collected from each site, and will be abbreviated hereafter as HW1, HW2, and WT1, WT2. The colors of the points at each reef represent the colors used to represent each genotype in subsequent plots of gene expression and bacteria community results. (B) Time series line plot of average water temperature recorded at Houwan and Wanglitung reefs for the 2016 year that shows no differences in the typical temperatures at each reef site, which ranged from 23 – 30.5ºC.

**Supplementary Figure 2:** Experimental design and recirculating aquarium systems for heat stress, antibiotics, and antibiotics-heat stress treatments.

**Supplementary Figure 3:** Experiment temperature trace for control (blue) and heat stress (red) aquarium systems.

**Supplementary Figure 4:** Representative photographs of *Pocillopora* coral fragments from each genotype in each treatment at the time of sampling. All fragments in the control, heat stress, and antibiotics treatment appeared visually healthy, while two fragments in the antibiotics-heat stress treatment showed early signs of tissue loss.

**Supplementary Figure 5:** (A) Read counts and (B) read proportions per sample through each step of the dual RNAseq data analysis pipeline.

**Supplementary Figure 6:** Read depth barplot and rarefaction curves of bacteria 16S amplicon sequencing.


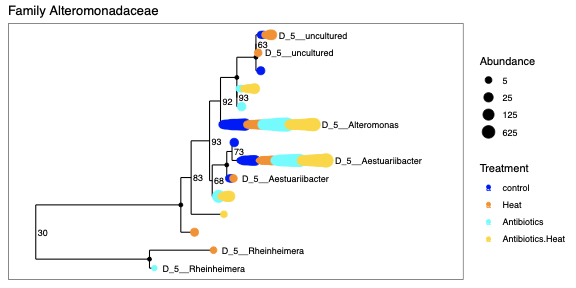


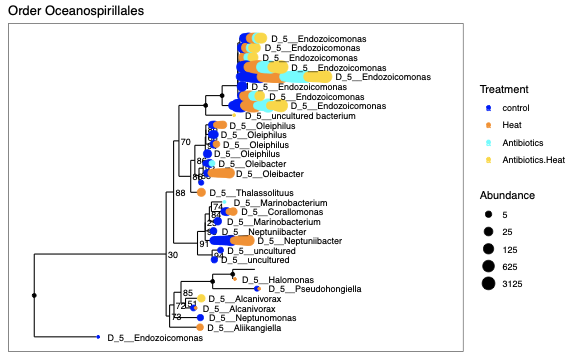


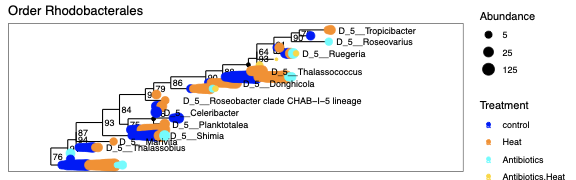


**Supplementary Figure 7:** Phylogenetic trees of (A) Order Oceanospirillales demonstrates persistence of *Endozoicomonas* bacteria through antibiotics treatment, reveals the antibiotics susceptibility of bacteria in the related families Oleiphilaceae and Oceanospirillaceae. (B) Order Rhodobacterales, and (C) Order Alteromonadales

**Supplementary Figure 8:** ALDeX2 MA and MW plots reveal specific differentially abundant ASVs between the (A) heat stress, (B) antibiotics, and (C) antibiotics-heat stress treatments versus the control treatment. Significantly differentially abundant ASVs are colored red, and labels are plotted containing the family level classification and species identification (if present).
