# Supplementary material for: Antibiotics Alter Pocillopora Coral-Symbiodiniaceae-Bacteria Interactions and Cause Microbial Dysbiosis During Heat Stress
Source: Frontiers journal article supplement (doi:10.3389/fmars.2021.814124), 2022-01-13
Supplement: Table_1.XLSX [file Table_1.XLSX]

## Sheet: Table_S1_Pipeline_Metrics
Supplementary Table 1: Summary metrics for dual Pocillopora and Cladocopium RNAseq analysis pipeline
Sample_ID	Colony	Treatment	rawCounts	trimmedCounts	singleMapped_Pocillopora	geneCounted_Pocillopora	unMapped_Cladocopium	singleMapped_Cladocopium	geneCounted_Cladocopium
Hw1-1a	Hw1	Antibiotics.Heat	9713826	9673324	6704877	4907111	2823060	1402892	644797
Hw1-1b	Hw1	Antibiotics.Heat	9526623	9506065	7086558	5309766	2282222	1387413	714370
Hw1-1c	Hw1	Antibiotics.Heat	9405980	9390990	5923618	4199512	3341888	1793446	824794
Hw1-4a	Hw1	Heat	9878242	9723143	5189007	3460228	4410489	2494319	1129535
Hw1-4b	Hw1	Heat	8240977	7839487	5223596	3983516	2502291	1687455	861204
Hw1-4c	Hw1	Heat	9008039	8914384	6485596	4734756	2281543	1359529	692740
Hw1-5a	Hw1	Antibiotics	18960801	18912247	13467873	9285764	5145171	3051261	1401087
Hw1-5b	Hw1	Antibiotics	16436451	16393549	12120565	8762394	3989707	2204554	1095014
Hw1-5c	Hw1	Antibiotics	17544535	17433807	11201092	8108113	5983284	4162337	2089047
Hw1-6a	Hw1	control	18833722	18799781	12617864	8976150	5903039	3866802	1867899
Hw1-6b	Hw1	control	18562124	18342063	11523085	8323104	6541638	4582359	2216786
Hw1-6c	Hw1	control	16512815	16481147	9621091	6759635	6627351	4495738	2168582
Hw2-1a	Hw2	Antibiotics.Heat	10496100	10472754	6638868	4692925	3670114	2082226	989859
Hw2-1b	Hw2	Antibiotics.Heat	12245939	11831857	9034211	6783984	2535870	1140776	551287
Hw2-1c	Hw2	Antibiotics.Heat	12434475	12322138	9106328	6338289	2994490	1102657	454118
Hw2-4a	Hw2	Heat	8980206	8951303	4817979	3513488	4002064	2981977	1548540
Hw2-4b	Hw2	Heat	10511804	10432577	6883509	4881184	3346300	2086773	1055003
Hw2-4c	Hw2	Heat	9776438	9551871	6467131	4602778	2914107	1796238	921588
Hw2-5a	Hw2	Antibiotics	16284291	16215992	10467839	7621833	5468408	3580939	1794217
Hw2-5b	Hw2	Antibiotics	20399254	20316159	13484831	9602954	6453319	4073107	1970256
Hw2-5c	Hw2	Antibiotics	12877663	12819188	9249569	6676437	3322799	1919992	981909
Hw2-6b	Hw2	control	18646988	18609554	12397998	8628697	5828155	3650452	1776440
Hw2-6c	Hw2	control	15441056	15338616	9294097	6719010	5785011	4054822	2091184
Wt1-1a	Wt1	Antibiotics.Heat	11033722	10852584	8447033	6191125	2186422	863130	407523
Wt1-1b	Wt1	Antibiotics.Heat	10372574	10269843	7223950	5218974	2863725	1661372	819051
Wt1-1c	Wt1	Antibiotics.Heat	11361597	11345796	8940777	6477923	2171812	848015	423150
Wt1-4a	Wt1	Heat	8813038	8799963	6216411	4548852	2415379	1394883	712492
Wt1-4b	Wt1	Heat	8605733	8465190	5900732	4239550	2392442	1389823	706880
Wt1-4c	Wt1	Heat	12363692	12339189	6990748	4980833	5150825	3694418	1884565
Wt1-5a	Wt1	Antibiotics	8838656	8818330	6477803	4741392	2169113	1109730	547360
Wt1-5b	Wt1	Antibiotics	16798558	16712528	12524793	9058877	3845035	1923488	990219
Wt1-5c	Wt1	Antibiotics	16456343	16390286	11723804	8608768	4350197	2445723	1262498
Wt1-6a	Wt1	control	18493445	18457799	14038841	10283164	4016567	1888038	948365
Wt1-6b	Wt1	control	18437673	17973556	12750299	9246110	4891084	2798508	1422403
Wt1-6c	Wt1	control	17822511	17742038	13422372	9937426	3955402	1904907	964623
Wt2-1a	Wt2	Antibiotics.Heat	20428312	20339832	15356577	11162588	4562570	2193476	1081277
Wt2-1b	Wt2	Antibiotics.Heat	9391494	9351102	7504504	5562226	1641731	499602	231534
Wt2-1c	Wt2	Antibiotics.Heat	8837483	8823033	6874045	5164171	1772907	713844	356472
Wt2-4a	Wt2	Heat	12318282	12283946	7677095	5233448	4400904	1885848	777145
Wt2-4b	Wt2	Heat	16357350	16321135	12477533	9226647	3508010	1647938	787347
Wt2-4c	Wt2	Heat	20366051	20323384	13803888	10207910	6120548	3743027	1841457
Wt2-5a	Wt2	Antibiotics	14254282	14193733	11302792	8194559	2579192	893770	450947
Wt2-5b	Wt2	Antibiotics	15344722	15254622	11657578	8654239	3285199	1254479	632692
Wt2-5c	Wt2	Antibiotics	9178593	8892419	6818788	5118736	1907535	877418	446175
Wt2-6a	Wt2	control	18020168	17871277	13471410	9971455	4015572	1963505	1000876
Wt2-6b	Wt2	control	16780258	16751731	10600920	8046746	5865929	4017477	2055214
Wt2-6c	Wt2	control	15668816	15604812	11343253	8229834	3956393	1547134	673209

## Sheet: Table_S2_Symbiont_Reads
Supplementary Table 2: Symbiodiniaceae ITS1, ITS2, and cp23S BWA read alignment counts table
Sample Information			ITS1			ITS2			cp23S
Sample_ID	Colony	Treatment	# C reads	# D reads	Proportion C	# C reads	# D reads	Proportion C	# C reads	# D reads	Proportion C
Hw1-1a	Hw1	Antibiotics.Heat	71	61	0.537879	59	0	1	310	141	0.687361
Hw1-1b	Hw1	Antibiotics.Heat	9	8	0.529412	5	0	1	36	14	0.72
Hw1-1c	Hw1	Antibiotics.Heat	65	52	0.555556	121	1	0.991803	806	291	0.734731
Hw1-4a	Hw1	Heat	138	98	0.584746	388	2	0.994872	1770	458	0.794434
Hw1-4b	Hw1	Heat	11	9	0.55	5	0	1	19	12	0.612903
Hw1-4c	Hw1	Heat	14	13	0.518519	2	0	1	23	2	0.92
Hw1-5a	Hw1	Antibiotics	46	43	0.516854	11	0	1	637	167	0.792289
Hw1-5b	Hw1	Antibiotics	20	19	0.512821	9	0	1	562	179	0.758435
Hw1-5c	Hw1	Antibiotics	18	9	0.666667	6	0	1	309	75	0.804688
Hw1-6a	Hw1	control	35	27	0.564516	8	0	1	263	68	0.794562
Hw1-6b	Hw1	control	47	35	0.573171	17	0	1	423	129	0.766304
Hw1-6c	Hw1	control	425	397	0.517032	241	0	1	1210	308	0.797101
Hw2-1a	Hw2	Antibiotics.Heat	50	46	0.520833	37	0	1	582	198	0.746154
Hw2-1b	Hw2	Antibiotics.Heat	68	68	0.5	7	0	1	52	16	0.764706
Hw2-1c	Hw2	Antibiotics.Heat	43	42	0.505882	25	0	1	301	116	0.721823
Hw2-4a	Hw2	Heat	8	6	0.571429	6	0	1	113	28	0.801418
Hw2-4b	Hw2	Heat	11	7	0.611111	2	0	1	81	16	0.835052
Hw2-4c	Hw2	Heat	4	4	0.5	1	0	1	43	12	0.781818
Hw2-5a	Hw2	Antibiotics	21	20	0.512195	10	0	1	190	64	0.748031
Hw2-5b	Hw2	Antibiotics	30	20	0.6	11	0	1	284	92	0.755319
Hw2-5c	Hw2	Antibiotics	16	13	0.551724	5	0	1	83	19	0.813725
Hw2-6b	Hw2	control	32	22	0.592593	11	0	1	475	159	0.749211
Hw2-6c	Hw2	control	18	13	0.580645	6	0	1	164	52	0.759259
Wt1-1a	Wt1	Antibiotics.Heat	9	9	0.5	0	0	N/A	31	8	0.794872
Wt1-1b	Wt1	Antibiotics.Heat	11	11	0.5	4	0	1	124	22	0.849315
Wt1-1c	Wt1	Antibiotics.Heat	8	6	0.571429	2	0	1	47	16	0.746032
Wt1-4a	Wt1	Heat	3	2	0.6	5	0	1	56	12	0.823529
Wt1-4b	Wt1	Heat	4	4	0.5	0	0	N/A	45	11	0.803571
Wt1-4c	Wt1	Heat	8	6	0.571429	4	0	1	191	44	0.812766
Wt1-5a	Wt1	Antibiotics	8	8	0.5	12	0	1	72	21	0.774194
Wt1-5b	Wt1	Antibiotics	12	11	0.521739	5	0	1	134	42	0.761364
Wt1-5c	Wt1	Antibiotics	11	10	0.52381	8	0	1	139	58	0.705584
Wt1-6a	Wt1	control	22	21	0.511628	7	0	1	189	62	0.752988
Wt1-6b	Wt1	control	22	20	0.52381	3	0	1	93	13	0.877358
Wt1-6c	Wt1	control	13	11	0.541667	2	0	1	90	37	0.708661
Wt2-1a	Wt2	Antibiotics.Heat	27	24	0.529412	7	0	1	142	62	0.696078
Wt2-1b	Wt2	Antibiotics.Heat	10	8	0.555556	2	0	1	78	17	0.821053
Wt2-1c	Wt2	Antibiotics.Heat	10	8	0.555556	3	0	1	77	36	0.681416
Wt2-4a	Wt2	Heat	131	105	0.555085	234	0	1	3341	802	0.80642
Wt2-4b	Wt2	Heat	12	9	0.571429	8	0	1	369	117	0.759259
Wt2-4c	Wt2	Heat	36	23	0.610169	12	0	1	463	165	0.737261
Wt2-5a	Wt2	Antibiotics	6	5	0.545455	1	0	1	69	14	0.831325
Wt2-5b	Wt2	Antibiotics	13	10	0.565217	4	0	1	45	18	0.714286
Wt2-5c	Wt2	Antibiotics	0	0	N/A	0	0	N/A	50	31	0.617284
Wt2-6a	Wt2	control	11	9	0.55	2	0	1	66	22	0.75
Wt2-6b	Wt2	control	13	10	0.565217	6	0	1	107	19	0.849206
Wt2-6c	Wt2	control	73	56	0.565891	170	0	1	2032	473	0.811178

## Sheet: Table_S3_RNAseq_PERMANOVAs
Pocillopora Treatment
pairs	Df	SumsOfSqs	F.Model	R2	p.value	p.adjusted	sig
Antibiotics.Heat vs Heat	1	1.46271e+08	4.80747	0.179333	0.001	0.006	*
Antibiotics.Heat vs Antibiotics	1	1.06523e+08	3.63921	0.141939	0.002	0.012	.
Antibiotics.Heat vs control	1	1.85146e+08	6.3663	0.232633	0.001	0.006	*
Heat vs Antibiotics	1	4.89485e+07	2.14141	0.0887029	0.032	0.192
Heat vs control	1	4.26823e+07	1.90853	0.0833108	0.055	0.33
Antibiotics vs control	1	3.44795e+07	1.62992	0.072025	0.123	0.738
Cladocopium Treatment
pairs	Df	SumsOfSqs	F.Model	R2	p.value	p.adjusted	sig
Antibiotics.Heat vs Heat	1	2.54717e+07	3.19507	0.126813	0.008	0.048	.
Antibiotics.Heat vs Antibiotics	1	1.50104e+07	1.80722	0.0759108	0.058	0.348
Antibiotics.Heat vs control	1	2.35469e+07	3.14702	0.130327	0.003	0.018	.
Heat vs Antibiotics	1	1.69042e+07	2.52604	0.102994	0.015	0.09
Heat vs control	1	5.31634e+06	0.917937	0.0418806	0.427	1
Antibiotics vs control	1	1.35037e+07	2.1989	0.0947847	0.044	0.264
Pocillopora Colony
pairs	Df	SumsOfSqs	F.Model	R2	p.value	p.adjusted	sig
HW1 vs HW2	1	1.94263e+08	7.4565	0.262032	0.001	0.006	*
HW1 vs WT1	1	2.33264e+08	10.8464	0.330215	0.001	0.006	*
HW1 vs WT2	1	2.47909e+08	11.6426	0.346067	0.001	0.006	*
HW2 vs WT1	1	1.27756e+08	6.40441	0.2337	0.001	0.006	*
HW2 vs WT2	1	1.53826e+08	7.79851	0.270796	0.001	0.006	*
WT1 vs WT2	1	5.89832e+07	3.8137	0.14774	0.002	0.012	.
Cladocopium Colony
pairs	Df	SumsOfSqs	F.Model	R2	p.value	p.adjusted	sig
HW1 vs HW2	1	2.97948e+07	6.53875	0.237438	0.001	0.006	*
HW1 vs WT1	1	5.48082e+07	11.4013	0.341343	0.001	0.006	*
HW1 vs WT2	1	6.0866e+07	11.0362	0.334064	0.001	0.006	*
HW2 vs WT1	1	49644186	10.1725	0.326329	0.001	0.006	*
HW2 vs WT2	1	5.55695e+07	9.88448	0.320047	0.001	0.006	*
WT1 vs WT2	1	1.06422e+07	1.8273	0.0766892	0.027	0.162

## Sheet: Table_S4A_DEGs_coral
Supplementary Table 3A: Pocillopora DESeq2 all-genotypes model results summary table
ID	log2FoldChange_Heat_control	log2FoldChange_Antibiotics_control	log2FoldChange_Antibiotics.Heat_control	padj_Heat_control	padj_Antibiotics_control	padj_Antibiotics.Heat_control	DE_Heat	DE_Antibiotics	DE_Antibiotics.Heat	Gene_Name	Gene_Info	GO_Terms_IPS	GO_Terms_EM	KO_Terms_KAAS	KO_Terms_EM	KOG_Class_A	KOG_Class	Pfam_Domains
pdam_00000001	0.279896	0.0672683	-0.254156	0.470404	0.896316	0.368372	NA	NA	NA	NA	unknown function	GO:0005515, GO:0007165	NA	NA	NA	NA	NA	PF00531
pdam_00000002	-0.0809654	-0.383006	-0.774704	0.850611	0.217305	0.000749367	NA	NA	Downregulated	NA	Uncharacterized 41.2 kDa protein in cps region (Klebsiella pneumoniae)	NA	NA	NA	NA	NA	NA	PF00534, PF16095
pdam_00000003	0.209604	-0.319891	-0.669069	0.682981	0.501258	0.0338245	NA	NA	Downregulated	NA	unknown function	NA	NA	NA	NA	NA	NA	PF16095
pdam_00000006	-0.0902144	-0.379147	-0.613997	0.783354	0.116652	0.00107226	NA	NA	Downregulated	NA	unknown function	GO:0005515	NA	NA	NA	NA	NA	PF13424
pdam_00000007	-0.147869	-0.0635383	-0.355971	0.609879	0.851811	0.0525372	NA	NA	NA	NA	KLC1: Kinesin light chain 1 (Homo sapiens)	GO:0005515	NA	NA	NA	NA	NA	PF13424
pdam_00000008	-0.0211888	-0.187697	-0.447635	0.963179	0.608495	0.0587594	NA	NA	NA	NA	unknown function	GO:0005515, GO:0007165	NA	NA	NA	NA	NA	NA
pdam_00000009	-0.08707	-0.188981	-0.42446	0.73934	0.383856	0.0058364	NA	NA	Downregulated	NA	unknown function	NA	NA	NA	NA	NA	NA	NA
pdam_00000011	-0.0893883	-0.135517	-0.188001	0.752754	0.606271	0.282112	NA	NA	NA	NA	unknown function	GO:0005515	NA	NA	NA	NA	NA	PF13374, PF13424
pdam_00000014	-0.0646688	-0.0828078	-0.0688283	0.732306	0.642693	0.576336	NA	NA	NA	SNUPN	SNUPN: Snurportin-1 (Homo sapiens)	GO:0005515	GO:0000003,GO:0000339,GO:0000375,GO:0000377,GO:0000387,GO:0000398,GO:0002119,GO:0002164,GO:0003674,GO:0003676,GO:0003723,GO:0005488,GO:0005575,GO:0005622,GO:0005623,GO:0005634,GO:0005635,GO:0005643,GO:0005737,GO:0005829,GO:0005846,GO:0006139,GO:0006396,GO:0006397,GO:0006725,GO:0006807,GO:0006810,GO:0006897,GO:0006898,GO:0007275,GO:0008150,GO:0008152,GO:0008380,GO:0009790,GO:0009791,GO:0009792,GO:…	K13151	K13151	A	RNA processing and modification	PF11538
pdam_00000015	0.00840324	0.00848966	0.286419	0.978049	0.980595	0.0534257	NA	NA	NA	NA	Slob: Slowpoke-binding protein (Drosophila melanogaster)	GO:0003779	GO:0003008,GO:0003674,GO:0003824,GO:0004672,GO:0005488,GO:0005515,GO:0005575,GO:0005622,GO:0005623,GO:0005737,GO:0006464,GO:0006468,GO:0006793,GO:0006796,GO:0006950,GO:0007154,GO:0007267,GO:0007268,GO:0007274,GO:0008150,GO:0008152,GO:0009605,GO:0009987,GO:0009991,GO:0010646,GO:0016020,GO:0016301,GO:0016310,GO:0016740,GO:0016772,GO:0016773,GO:0019226,GO:0019538,GO:0023051,GO:0023052,GO:0031644,GO:…	K17543	K17543	NA	NA	PF02205
pdam_00000018	0.0529399	-0.0424948	-0.147162	0.857222	0.891201	0.397289	NA	NA	NA	RAP2C	Rap1a: Ras-related protein Rap-1A (Rattus norvegicus)	GO:0003924, GO:0005525, GO:0007165, GO:0016020	GO:0000166,GO:0001882,GO:0001883,GO:0001932,GO:0001934,GO:0003674,GO:0003824,GO:0003924,GO:0005488,GO:0005525,GO:0005575,GO:0005622,GO:0005623,GO:0005737,GO:0005768,GO:0005829,GO:0006139,GO:0006152,GO:0006163,GO:0006184,GO:0006195,GO:0006725,GO:0006753,GO:0006793,GO:0006796,GO:0006807,GO:0006996,GO:0007010,GO:0007154,GO:0007165,GO:0007264,GO:0007265,GO:0007275,GO:0007399,GO:0008104,GO:0008150,GO:…	NA	K07837,K07838,K07839	NA	NA	PF00071
pdam_00000020	-0.331795	-0.323668	-0.362467	0.324674	0.32428	0.134351	NA	NA	NA	GALR2	Npffr1: Neuropeptide FF receptor 1 (Rattus norvegicus)	GO:0004930, GO:0007186, GO:0016021	GO:0001653,GO:0003008,GO:0003012,GO:0003674,GO:0004871,GO:0004872,GO:0004888,GO:0004930,GO:0004966,GO:0005488,GO:0005575,GO:0005623,GO:0005886,GO:0005887,GO:0006066,GO:0006140,GO:0006629,GO:0006644,GO:0006650,GO:0006793,GO:0006796,GO:0006873,GO:0006874,GO:0006875,GO:0006936,GO:0007154,GO:0007165,GO:0007166,GO:0007186,GO:0007187,GO:0007188,GO:0007189,GO:0007193,GO:0007194,GO:0007204,GO:0007218,GO:…	NA	K04230,K04231,K04232,K04233,K08374,K08385	T	Signal transduction mechanisms	PF00001
pdam_00000021	0.335028	0.184004	0.574768	0.0281988	0.274442	1.10339e-06	Upregulated	NA	Upregulated	ASB7	Asb7: Ankyrin repeat and SOCS box protein 7 (Mus musculus)	GO:0005515, GO:0035556	NA	K10329	K10329	M	Cell wall/membrane/envelope biogenesis	PF07525, PF127965
pdam_00000022	0.0103646	-0.0269357	0.0305594	0.954741	0.875651	0.766481	NA	NA	NA	KATNAL2	KATNAL2: Katanin p60 ATPase-containing subunit A-like 2 (Homo sapiens)	GO:0005515, GO:0005524	GO:0000003,GO:0000166,GO:0000212,GO:0000226,GO:0000910,GO:0000922,GO:0001882,GO:0001883,GO:0003674,GO:0003824,GO:0005488,GO:0005515,GO:0005524,GO:0005575,GO:0005622,GO:0005623,GO:0005634,GO:0005819,GO:0005856,GO:0006139,GO:0006152,GO:0006163,GO:0006195,GO:0006200,GO:0006725,GO:0006753,GO:0006793,GO:0006796,GO:0006807,GO:0006996,GO:0007010,GO:0007017,GO:0007049,GO:0007051,GO:0007059,GO:0007126,GO:…	K07767	K07767	O	Posttranslational modification, protein turnover, chaperones	PF00004, PF08513
pdam_00000023	0.154027	0.0210897	0.0341683	0.414733	0.937601	0.8193	NA	NA	NA	FAM227B	FAM227B: Protein FAM227B (Homo sapiens)	NA	NA	NA	NA	NA	NA	PF14922
pdam_00000024	-0.237576	-0.207403	0.427456	0.645477	0.69247	0.188404	NA	NA	NA	NA	ALOX5: Arachidonate 5-lipoxygenase (Homo sapiens)	GO:0016702, GO:0046872, GO:0055114	NA	NA	NA	NA	NA	PF00305
pdam_00000025	-0.0408837	-0.0231569	0.101614	0.865306	0.930284	0.466277	NA	NA	NA	GTF2H2	GTF2H2: General transcription factor IIH subunit 2 (Bos taurus)	GO:0000439, GO:0006289, GO:0006351	GO:0000109,GO:0000112,GO:0000428,GO:0000439,GO:0000441,GO:0000718,GO:0000988,GO:0000990,GO:0000991,GO:0001071,GO:0001109,GO:0001111,GO:0001112,GO:0001113,GO:0001120,GO:0002029,GO:0002031,GO:0002119,GO:0002164,GO:0003674,GO:0003676,GO:0003700,GO:0003723,GO:0005488,GO:0005575,GO:0005622,GO:0005623,GO:0005634,GO:0005654,GO:0005667,GO:0005675,GO:0005737,GO:0005829,GO:0006139,GO:0006259,GO:0006281,GO:…	K03142	K00889,K03142	K	Transcription	PF04056
pdam_00000027	0.0534966	-0.106156	0.151255	0.889877	0.763206	0.487495	NA	NA	NA	ACSBG2	acsbg2: Long-chain-fatty-acid--CoA ligase ACSBG2 (Xenopus laevis)	GO:0003824, GO:0008152	GO:0000003,GO:0000038,GO:0001508,GO:0001552,GO:0001676,GO:0003006,GO:0003008,GO:0003674,GO:0003824,GO:0004467,GO:0005575,GO:0005622,GO:0005623,GO:0005737,GO:0005739,GO:0005783,GO:0005829,GO:0006082,GO:0006629,GO:0006631,GO:0006635,GO:0007154,GO:0007272,GO:0007275,GO:0007399,GO:0007498,GO:0007548,GO:0008150,GO:0008152,GO:0008366,GO:0008406,GO:0008585,GO:0009056,GO:0009062,GO:0009719,GO:0009725,GO:…	K15013	K15013	I	Lipid transport and metabolism	PF00501
pdam_00000028	0.0348774	0.111707	0.161777	0.921487	0.717279	0.411584	NA	NA	NA	NA	Ttc28: Tetratricopeptide repeat protein 28 (Mus musculus)	GO:0005515	NA	NA	NA	U	Intracellular trafficking, secretion, and vesicular transport	PF12770, PF13181, PF13374, PF13424
pdam_00000029	-0.116332	0.128834	0.412891	0.624293	0.577119	0.00390923	NA	NA	Upregulated	SPG21	Spg21: Maspardin (Mus musculus)	NA	GO:0002253,GO:0002376,GO:0002429,GO:0002682,GO:0002684,GO:0002757,GO:0002764,GO:0002768,GO:0003674,GO:0005102,GO:0005488,GO:0005515,GO:0005575,GO:0005622,GO:0005623,GO:0005634,GO:0005737,GO:0005768,GO:0005794,GO:0005798,GO:0005802,GO:0005829,GO:0007154,GO:0007165,GO:0007166,GO:0008150,GO:0009987,GO:0010008,GO:0016020,GO:0016023,GO:0023052,GO:0030133,GO:0030135,GO:0030136,GO:0030140,GO:0031090,GO:…	K19367	K18169,K19367	NA	NA	PF00561
pdam_00000030	0.0578953	-0.0556699	0.0232763	0.803458	0.821613	0.88084	NA	NA	NA	KIAA0825	KIAA0825: Uncharacterized protein KIAA0825 (Homo sapiens)	NA	NA	NA	NA	NA	NA	PF14906
pdam_00000031	0.106928	0.159202	0.015457	0.654541	0.447468	0.931169	NA	NA	NA	TNFAIP8	TNFAIP8: Tumor necrosis factor alpha-induced protein 8 (Gallus gallus)	NA	GO:0002165,GO:0003674,GO:0004857,GO:0004866,GO:0004869,GO:0005575,GO:0005622,GO:0005623,GO:0005737,GO:0006915,GO:0007275,GO:0007431,GO:0007435,GO:0007552,GO:0007559,GO:0008150,GO:0008219,GO:0009653,GO:0009791,GO:0009886,GO:0009888,GO:0009987,GO:0010466,GO:0010941,GO:0010951,GO:0012501,GO:0016265,GO:0016271,GO:0019222,GO:0022612,GO:0030234,GO:0030414,GO:0032501,GO:0032502,GO:0035070,GO:0035071,GO:…	NA	NA	A	RNA processing and modification	PF05527
pdam_00000033	0.129216	0.0935255	-0.115951	0.670013	0.771625	0.577724	NA	NA	NA	NA	TRIM2: Tripartite motif-containing protein 2 (Homo sapiens)	NA	NA	NA	NA	O	Posttranslational modification, protein turnover, chaperones	PF136398
pdam_00000041	-0.0791903	-0.103603	-0.143906	0.828604	0.770428	0.520074	NA	NA	NA	NA	unknown function	NA	NA	NA	NA	NA	NA	NA
pdam_00000042	0.000455035	0.174323	0.433537	0.997897	0.337607	0.000590292	NA	NA	Upregulated	NDUFA6	NDUFA6: NADH dehydrogenase [ubiquinone] 1 alpha subcomplex subunit 6 (Pan troglodytes)	NA	GO:0002119,GO:0002164,GO:0003674,GO:0003824,GO:0003954,GO:0005575,GO:0005622,GO:0005623,GO:0005737,GO:0005739,GO:0005740,GO:0005743,GO:0005746,GO:0005747,GO:0006091,GO:0006119,GO:0006120,GO:0006793,GO:0006796,GO:0006950,GO:0006979,GO:0007275,GO:0007568,GO:0008137,GO:0008150,GO:0008152,GO:0008340,GO:0009790,GO:0009791,GO:0009792,GO:0009987,GO:0010259,GO:0015980,GO:0016020,GO:0016310,GO:0016491,GO:…	K03950	K03950	C	Energy production and conversion	PF05347
pdam_00000045	0.0897323	0.0424656	0.196155	0.380304	0.723115	0.00427455	NA	NA	Upregulated	NA	BSG: Basigin (Oryctolagus cuniculus)	NA	NA	NA	NA	T	Signal transduction mechanisms	PF07679
pdam_00000046	-1.09407	-0.76801	-1.75375	0.000138035	0.0100023	2.67391e-12	Downregulated	Downregulated	Downregulated	NA	unknown function	NA	NA	NA	NA	T	Signal transduction mechanisms	NA
pdam_00000047	-1.35149	-0.557699	-2.21497	0.00189507	0.286716	1.24384e-09	Downregulated	NA	Downregulated	NA	unknown function	NA	NA	NA	NA	NA	NA	PF07686
pdam_00000048	-1.14442	-0.399648	-2.01218	0.0139204	0.493266	5.94156e-08	Downregulated	NA	Downregulated	NA	unknown function	NA	NA	NA	NA	T	Signal transduction mechanisms	NA
pdam_00000050	-0.0954369	-0.0565378	0.518179	0.758451	0.871106	0.00300923	NA	NA	Upregulated	NA	unknown function	NA	NA	NA	NA	NA	NA	NA
pdam_00000051	-0.334977	0.187525	0.296407	0.300321	0.594105	0.200614	NA	NA	NA	NA	unknown function	NA	NA	NA	NA	NA	NA	NA
pdam_00000053	0.125277	0.111527	0.407198	0.633466	0.665748	0.00962159	NA	NA	Upregulated	FEM1B	FEM1B: Protein fem-1 homolog B (Gallus gallus)	GO:0005515	GO:0000003,GO:0001655,GO:0001763,GO:0002009,GO:0002064,GO:0002070,GO:0003006,GO:0003674,GO:0003824,GO:0004842,GO:0005102,GO:0005123,GO:0005126,GO:0005488,GO:0005515,GO:0005575,GO:0005622,GO:0005623,GO:0005634,GO:0005737,GO:0006464,GO:0006917,GO:0007275,GO:0008150,GO:0008152,GO:0009653,GO:0009887,GO:0009888,GO:0009987,GO:0010941,GO:0010942,GO:0012502,GO:0016567,GO:0016874,GO:0016879,GO:0016881,GO:…	NA	K10349	NA	NA	PF12796
pdam_00000054	0.212793	-0.0692949	-0.360159	0.248723	0.768259	0.00555504	NA	NA	Downregulated	DENND4C	DENND4A: C-myc promoter-binding protein (Homo sapiens)	GO:0000813	GO:0003674,GO:0003676,GO:0003677,GO:0005083,GO:0005085,GO:0005088,GO:0005488,GO:0005515,GO:0005516,GO:0005575,GO:0005622,GO:0005623,GO:0005634,GO:0005737,GO:0005768,GO:0005829,GO:0005886,GO:0005938,GO:0006355,GO:0007009,GO:0008104,GO:0008105,GO:0008150,GO:0009719,GO:0009725,GO:0009889,GO:0009987,GO:0010033,GO:0010243,GO:0010468,GO:0010556,GO:0012505,GO:0012506,GO:0016020,GO:0016023,GO:0016043,GO:…	K20163	NA	T	Signal transduction mechanisms	PF02141, PF03455, PF03456, PF10240, PF13812
pdam_00000056	-0.0832942	-0.0499197	0.0791711	0.470267	0.694677	0.330895	NA	NA	NA	GTF2A1	TfIIA-L: Transcription initiation factor IIA subunit 1 (Drosophila melanogaster)	GO:0005672, GO:0006367	GO:0000428,GO:0000988,GO:0000990,GO:0000991,GO:0003674,GO:0005575,GO:0005622,GO:0005623,GO:0005634,GO:0005654,GO:0005667,GO:0005672,GO:0005737,GO:0005829,GO:0006139,GO:0006351,GO:0006352,GO:0006366,GO:0006367,GO:0006725,GO:0006807,GO:0007275,GO:0008150,GO:0008152,GO:0009058,GO:0009059,GO:0009790,GO:0009792,GO:0009889,GO:0009987,GO:0010467,GO:0010556,GO:0016043,GO:0016070,GO:0016591,GO:0018130,GO:…	K03122	K03122	K	Transcription	PF03153
pdam_00000057	-0.574077	-0.0856043	-1.08667	0.184598	0.891381	0.000402873	NA	NA	Downregulated	CDH2	Fat4: Protocadherin Fat 4 (Mus musculus)	GO:0005509, GO:0007156, GO:0016020	GO:0001568,GO:0001944,GO:0005575,GO:0005623,GO:0005886,GO:0005911,GO:0005912,GO:0005913,GO:0005916,GO:0006461,GO:0006928,GO:0007155,GO:0007156,GO:0007157,GO:0007275,GO:0007399,GO:0007416,GO:0008150,GO:0009653,GO:0009966,GO:0009967,GO:0009968,GO:0009987,GO:0010627,GO:0010646,GO:0010647,GO:0010648,GO:0010740,GO:0010769,GO:0010975,GO:0014704,GO:0016020,GO:0016043,GO:0016324,GO:0016337,GO:0016339,GO:…	NA	K06736	T	Signal transduction mechanisms	PF00008, PF00028, PF00090
pdam_00000064	0.0930774	-0.0461797	-0.164523	0.560965	0.805726	0.119452	NA	NA	NA	MAU2	v1g174619: MAU2 chromatid cohesion factor homolog (Nematostella vectensis)	GO:0005515, GO:0007064	GO:0000003,GO:0000070,GO:0000278,GO:0000280,GO:0000785,GO:0000819,GO:0000902,GO:0000904,GO:0003674,GO:0005488,GO:0005515,GO:0005575,GO:0005622,GO:0005623,GO:0005634,GO:0005654,GO:0005694,GO:0005737,GO:0006928,GO:0006935,GO:0006996,GO:0007049,GO:0007059,GO:0007062,GO:0007064,GO:0007067,GO:0007275,GO:0007399,GO:0007409,GO:0007411,GO:0007610,GO:0008150,GO:0009605,GO:0009653,GO:0009790,GO:0009792,GO:…	K11266	K11266	NA	NA	PF10345
pdam_00000065	0.0230813	0.0108711	-0.0265524	0.863039	0.943103	0.747901	NA	NA	NA	GATAD2A	GATAD2A: Transcriptional repressor p66-alpha (Homo sapiens)	GO:0006355, GO:0008270	GO:0000003,GO:0000118,GO:0000122,GO:0001568,GO:0001701,GO:0001708,GO:0001838,GO:0001841,GO:0001842,GO:0001843,GO:0001944,GO:0002009,GO:0002119,GO:0002164,GO:0003006,GO:0003674,GO:0005488,GO:0005515,GO:0005575,GO:0005622,GO:0005623,GO:0005634,GO:0005654,GO:0006139,GO:0006259,GO:0006304,GO:0006305,GO:0006306,GO:0006355,GO:0006357,GO:0006725,GO:0006807,GO:0006810,GO:0006897,GO:0006898,GO:0007275,GO:…	K23194	K10310	NA	NA	PF16563
pdam_00000069	-0.326522	-0.176691	-0.830798	0.184573	0.514585	2.21811e-06	NA	NA	Downregulated	NA	unknown function	NA	NA	NA	NA	NA	NA	PF12705
pdam_00000070	-0.142361	-0.15318	-0.444833	0.503237	0.459706	0.00112797	NA	NA	Downregulated	NA	EHBP1: EH domain-binding protein 1 (Homo sapiens)	NA	NA	NA	NA	Z	Cytoskeleton	PF00169, PF10358
pdam_00000073	-0.49498	-0.562721	-1.0275	0.0966874	0.0331471	7.1159e-06	NA	Downregulated	Downregulated	NA	unknown function	GO:0005216, GO:0006811, GO:0016021	NA	NA	NA	NA	NA	NA
pdam_00000074	0.137427	0.0916264	0.157343	0.143346	0.344545	0.0232101	NA	NA	Upregulated	VPS45	Vps45: Vacuolar protein sorting-associated protein 45 (Mus musculus)	GO:0006904, GO:0016192	GO:0000003,GO:0000011,GO:0000139,GO:0000149,GO:0000325,GO:0001505,GO:0003001,GO:0003008,GO:0003674,GO:0005488,GO:0005515,GO:0005575,GO:0005622,GO:0005623,GO:0005634,GO:0005737,GO:0005768,GO:0005773,GO:0005774,GO:0005794,GO:0005802,GO:0005829,GO:0006461,GO:0006605,GO:0006623,GO:0006810,GO:0006836,GO:0006873,GO:0006885,GO:0006886,GO:0006887,GO:0006892,GO:0006895,GO:0006896,GO:0006897,GO:0006900,GO:…	K12479	K03495,K12479	U	Intracellular trafficking, secretion, and vesicular transport	PF00995
pdam_00000076	0.122482	0.282921	0.444759	0.610101	0.133068	0.00214095	NA	NA	Upregulated	EMC2	emc2: ER membrane protein complex subunit 2 (Danio rerio)	GO:0005515	GO:0000003,GO:0000922,GO:0003674,GO:0005488,GO:0005515,GO:0005575,GO:0005622,GO:0005623,GO:0005634,GO:0005737,GO:0005739,GO:0005783,GO:0005789,GO:0005794,GO:0005815,GO:0005816,GO:0005819,GO:0005829,GO:0005856,GO:0005875,GO:0006457,GO:0006810,GO:0006897,GO:0006898,GO:0006915,GO:0008150,GO:0008152,GO:0008219,GO:0009987,GO:0012501,GO:0012505,GO:0015630,GO:0016020,GO:0016021,GO:0016192,GO:0016265,GO:…	K23563	NA	NA	NA	PF13181, PF14559
pdam_00000081	0.0492954	0.0142316	-0.195217	0.797611	0.95322	0.0782384	NA	NA	NA	EVI5	EVI5L: EVI5-like protein (Homo sapiens)	GO:0005096, GO:0043087	GO:0000003,GO:0000131,GO:0001667,GO:0003006,GO:0003674,GO:0005083,GO:0005096,GO:0005097,GO:0005099,GO:0005575,GO:0005622,GO:0005623,GO:0005634,GO:0005737,GO:0005794,GO:0005798,GO:0005819,GO:0005829,GO:0005856,GO:0005886,GO:0005933,GO:0005934,GO:0005935,GO:0006140,GO:0006810,GO:0006888,GO:0006928,GO:0007275,GO:0007276,GO:0007292,GO:0007297,GO:0007298,GO:0008047,GO:0008150,GO:0008283,GO:0009118,GO:…	K20242	NA	K	Transcription	PF00566
pdam_00000083	-0.675383	0.333429	0.26191	0.0803565	0.39704	0.394067	NA	NA	NA	NA	unknown function	NA	NA	NA	NA	NA	NA	NA
pdam_00000087	-1.04657	0.00130377	-0.540224	0.00147289	0.998483	0.0617436	Downregulated	NA	NA	NA	unknown function	NA	NA	NA	NA	NA	NA	NA
pdam_00000088	-0.726099	0.217395	-0.187799	0.0566974	0.650411	0.570082	NA	NA	NA	NA	unknown function	NA	NA	NA	NA	NA	NA	NA
pdam_00000093	-0.140329	0.0530456	0.0585176	0.519522	0.844138	0.718441	NA	NA	NA	VAV1	Vav3: Guanine nucleotide exchange factor VAV3 (Mus musculus)	GO:0005085, GO:0005089, GO:0005515, GO:0035023, GO:0035556	GO:0000768,GO:0000902,GO:0000904,GO:0001071,GO:0001700,GO:0001775,GO:0002009,GO:0002252,GO:0002376,GO:0002520,GO:0002521,GO:0002682,GO:0002684,GO:0002694,GO:0002696,GO:0002764,GO:0002768,GO:0003674,GO:0003700,GO:0005083,GO:0005085,GO:0005088,GO:0005089,GO:0005488,GO:0005575,GO:0005622,GO:0005623,GO:0005737,GO:0005829,GO:0005886,GO:0006140,GO:0006355,GO:0006582,GO:0006725,GO:0006810,GO:0006897,GO:…	K05730	K05730	T	Signal transduction mechanisms	PF00017, PF00018, PF00130, PF00169, PF00307, PF00621
pdam_00000094	-0.337367	0.18214	0.397178	0.423078	0.703212	0.175479	NA	NA	NA	NA	DDB_G0267786: PH domain-containing protein DDB_G0267786 (Dictyostelium discoideum)	NA	NA	NA	NA	NA	NA	PF00169
pdam_00000095	0.0407898	0.0859668	0.433219	0.892971	0.755475	0.0047404	NA	NA	Upregulated	VPS52	VPS52: Vacuolar protein sorting-associated protein 52 homolog (Homo sapiens)	NA	GO:0000003,GO:0000138,GO:0000139,GO:0000149,GO:0000902,GO:0000904,GO:0000938,GO:0003006,GO:0003674,GO:0005488,GO:0005515,GO:0005575,GO:0005622,GO:0005623,GO:0005737,GO:0005768,GO:0005794,GO:0005795,GO:0005797,GO:0005802,GO:0006810,GO:0006886,GO:0006892,GO:0006896,GO:0007034,GO:0007275,GO:0007398,GO:0007439,GO:0008104,GO:0008150,GO:0009653,GO:0009790,GO:0009826,GO:0009856,GO:0009860,GO:0009888,GO:…	K20298	NA	U	Intracellular trafficking, secretion, and vesicular transport	PF04129
pdam_00000099	0.394853	0.0442535	-0.219488	0.12276	0.909742	0.280955	NA	NA	NA	RAD50	RAD50: DNA repair protein RAD50 (Homo sapiens)	GO:0000723, GO:0005634, GO:0006281, GO:0009143, GO:0016887, GO:0030870, GO:0047429	GO:0000003,GO:0000014,GO:0000018,GO:0000019,GO:0000075,GO:0000077,GO:0000166,GO:0000228,GO:0000706,GO:0000722,GO:0000723,GO:0000724,GO:0000725,GO:0000726,GO:0000727,GO:0000729,GO:0000731,GO:0000734,GO:0000738,GO:0000781,GO:0000784,GO:0000785,GO:0000790,GO:0000793,GO:0000794,GO:0001882,GO:0001883,GO:0001932,GO:0001934,GO:0002164,GO:0002165,GO:0002168,GO:0003006,GO:0003674,GO:0003676,GO:0003677,GO:…	K10866	K10866	L	Replication, recombination and repair	PF01725, PF04423, PF13476
pdam_00000102	-0.11353	0.846182	1.46027	0.894984	0.138102	0.000736026	NA	NA	Upregulated	LRP6	Lrp6: Low-density lipoprotein receptor-related protein 6 (Mus musculus)	GO:0005509	GO:0000003,GO:0000902,GO:0000904,GO:0001101,GO:0001501,GO:0001654,GO:0001667,GO:0001702,GO:0001745,GO:0001756,GO:0001763,GO:0001837,GO:0001838,GO:0001841,GO:0001843,GO:0001932,GO:0001933,GO:0001947,GO:0002009,GO:0002011,GO:0002053,GO:0003002,GO:0003006,GO:0003007,GO:0003008,GO:0003143,GO:0003306,GO:0003307,GO:0003308,GO:0003344,GO:0003401,GO:0003674,GO:0004857,GO:0004871,GO:0004872,GO:0004888,GO:…	NA	K03068	T	Signal transduction mechanisms	PF00008, PF00058, PF14670
pdam_00000104	0.0389361	-0.132717	-0.0319782	0.950594	0.816107	0.932116	NA	NA	NA	LRP1	DMBT1: Deleted in malignant brain tumors 1 protein (Homo sapiens)	GO:0005044, GO:0016020	GO:0001568,GO:0001944,GO:0003674,GO:0004872,GO:0005102,GO:0005215,GO:0005488,GO:0005509,GO:0005515,GO:0005575,GO:0005622,GO:0005623,GO:0005634,GO:0005737,GO:0005886,GO:0005887,GO:0005905,GO:0006810,GO:0006897,GO:0006909,GO:0007275,GO:0008104,GO:0008150,GO:0008565,GO:0009653,GO:0009966,GO:0009968,GO:0010517,GO:0010640,GO:0010642,GO:0010646,GO:0010648,GO:0010874,GO:0010875,GO:0012505,GO:0014910,GO:…	NA	K04550	NA	NA	PF00058, PF00530, PF14670
pdam_00000105	-0.15105	0.409706	0.773051	0.649691	0.095344	4.85923e-05	NA	NA	Upregulated	NA	unknown function	GO:0005515, GO:0007165	NA	NA	NA	NA	NA	NA
pdam_00000110	0.012117	0.355883	0.8792	0.981364	0.319331	0.000401601	NA	NA	Upregulated	LRP1	LRP1: Prolow-density lipoprotein receptor-related protein 1 (Homo sapiens)	GO:0005515, GO:0007165	GO:0001568,GO:0001944,GO:0003674,GO:0004872,GO:0005041,GO:0005102,GO:0005215,GO:0005488,GO:0005509,GO:0005515,GO:0005575,GO:0005622,GO:0005623,GO:0005634,GO:0005737,GO:0005768,GO:0005886,GO:0005887,GO:0005905,GO:0006066,GO:0006629,GO:0006810,GO:0006897,GO:0006898,GO:0006909,GO:0006928,GO:0007154,GO:0007165,GO:0007166,GO:0007186,GO:0007205,GO:0007275,GO:0007568,GO:0008104,GO:0008150,GO:0008152,GO:…	NA	K04550	T	Signal transduction mechanisms	PF00058, PF00531
pdam_00000115	0.0610261	-0.131033	-0.422443	0.810981	0.556707	0.00342685	NA	NA	Downregulated	NA	unknown function	NA	NA	NA	NA	NA	NA	NA
pdam_00000116	-0.467477	-0.891996	-2.86435	0.345109	0.0294692	1.77627e-18	NA	Downregulated	Downregulated	LRP1	LRP6: Low-density lipoprotein receptor-related protein 6 (Homo sapiens)	GO:0005044, GO:0016020	GO:0001568,GO:0001944,GO:0003674,GO:0004872,GO:0005102,GO:0005215,GO:0005488,GO:0005509,GO:0005515,GO:0005575,GO:0005622,GO:0005623,GO:0005634,GO:0005737,GO:0005886,GO:0005887,GO:0005905,GO:0006810,GO:0006897,GO:0006909,GO:0007275,GO:0008104,GO:0008150,GO:0008565,GO:0009653,GO:0009966,GO:0009968,GO:0010517,GO:0010640,GO:0010642,GO:0010646,GO:0010648,GO:0010874,GO:0010875,GO:0012505,GO:0014910,GO:…	NA	K04550	NA	NA	PF00058, PF00530, PF14670
pdam_00000117	0.41497	0.595586	0.796364	0.319037	0.105459	0.00532922	NA	NA	Upregulated	NA	unknown function	NA	NA	NA	NA	NA	NA	NA
pdam_00000118	0.0490315	0.151883	0.399725	0.780541	0.27386	4.62455e-05	NA	NA	Upregulated	NA	march5: E3 ubiquitin-protein ligase MARCH5 (Danio rerio)	GO:0008270	NA	NA	K03871	A	RNA processing and modification	PF12906
pdam_00000120	-0.038487	0.0275954	-0.364139	0.914505	0.945003	0.0583573	NA	NA	NA	NR4A2	rxrga: Retinoic acid receptor RXR-gamma-A (Danio rerio)	GO:0003677, GO:0003700, GO:0003707, GO:0005634, GO:0006355, GO:0008270, GO:0043401, GO:0043565	GO:0000003,GO:0000302,GO:0000902,GO:0000904,GO:0000975,GO:0000976,GO:0000977,GO:0000981,GO:0000982,GO:0001012,GO:0001067,GO:0001071,GO:0001077,GO:0001228,GO:0001525,GO:0001568,GO:0001666,GO:0001667,GO:0001704,GO:0001707,GO:0001764,GO:0001936,GO:0001938,GO:0001944,GO:0001975,GO:0002040,GO:0002042,GO:0002119,GO:0002164,GO:0003008,GO:0003674,GO:0003676,GO:0003677,GO:0003700,GO:0003707,GO:0004871,GO:…	K08558	K04465,K08558,K08559	K	Transcription	PF00104, PF00105
pdam_00000127	0.0972579	0.244691	0.383931	0.719751	0.252551	0.0142863	NA	NA	Upregulated	TIF35	v1g171563: Eukaryotic translation initiation factor 3 subunit G (Nematostella vectensis)	GO:0003676, GO:0003743, GO:0005737, GO:0005852	GO:0000003,GO:0000022,GO:0000139,GO:0000226,GO:0000278,GO:0000280,GO:0002119,GO:0002164,GO:0002181,GO:0002183,GO:0002188,GO:0003674,GO:0003676,GO:0003723,GO:0003729,GO:0003743,GO:0005488,GO:0005575,GO:0005622,GO:0005623,GO:0005634,GO:0005737,GO:0005794,GO:0005829,GO:0005852,GO:0005886,GO:0006412,GO:0006413,GO:0006996,GO:0007010,GO:0007017,GO:0007049,GO:0007051,GO:0007052,GO:0007067,GO:0007275,GO:…	K03248	K03248,K09594	J	Translation, ribosomal structure and biogenesis	PF00076, PF12353
pdam_00000130	-0.0202543	0.132776	0.184491	0.951997	0.589224	0.27817	NA	NA	NA	C9ORF114	C9orf114: Putative methyltransferase C9orf114 (Homo sapiens)	NA	GO:0002119,GO:0002164,GO:0003674,GO:0003824,GO:0005575,GO:0005622,GO:0005623,GO:0005634,GO:0005730,GO:0005737,GO:0005829,GO:0006810,GO:0006897,GO:0006898,GO:0007275,GO:0008150,GO:0008152,GO:0008168,GO:0009790,GO:0009791,GO:0009792,GO:0016192,GO:0016740,GO:0016741,GO:0031974,GO:0031981,GO:0032259,GO:0032501,GO:0032502,GO:0040007,GO:0040008,GO:0040009,GO:0040010,GO:0043226,GO:0043227,GO:0043228,GO:…	K09142	K09142	E	Amino acid transport and metabolism	PF02598
pdam_00000131	-0.052132	0.0450112	-0.185315	0.895066	NA	0.409586	NA	NA	NA	FAAH2	FAAH2: Fatty-acid amide hydrolase 2 (Homo sapiens)	NA	GO:0003674,GO:0003824,GO:0005575,GO:0005622,GO:0005623,GO:0005737,GO:0005811,GO:0008150,GO:0008152,GO:0016020,GO:0016787,GO:0016810,GO:0016811,GO:0017064,GO:0044424,GO:0044444,GO:0044464	NA	K19176	NA	NA	PF01425
pdam_00000132	0.104053	-0.0102434	0.229731	0.470562	0.964133	0.0153654	NA	NA	Upregulated	VARS	Vars: Valine--tRNA ligase (Mus musculus)	GO:0000166, GO:0002161, GO:0004812, GO:0004832, GO:0005524, GO:0005737, GO:0006418, GO:0006438	GO:0000003,GO:0000166,GO:0001882,GO:0001883,GO:0002119,GO:0002164,GO:0002181,GO:0003674,GO:0003824,GO:0004812,GO:0004818,GO:0004832,GO:0005488,GO:0005524,GO:0005575,GO:0005622,GO:0005623,GO:0005737,GO:0005739,GO:0005829,GO:0006082,GO:0006139,GO:0006399,GO:0006412,GO:0006414,GO:0006418,GO:0006438,GO:0006520,GO:0006725,GO:0006807,GO:0006810,GO:0006897,GO:0006898,GO:0006915,GO:0007275,GO:0007399,GO:…	K01873	K01873	J	Translation, ribosomal structure and biogenesis	PF00133, PF08264, PF10458
pdam_00000133	0.0291918	-0.106162	0.0706539	0.89375	0.544784	0.573848	NA	NA	NA	ABCA2	ABCA2: ATP-binding cassette sub-family A member 2 (Homo sapiens)	GO:0005215, GO:0005524, GO:0006810, GO:0016021, GO:0016887	GO:0000166,GO:0000323,GO:0001882,GO:0001883,GO:0003674,GO:0003824,GO:0005215,GO:0005488,GO:0005524,GO:0005575,GO:0005622,GO:0005623,GO:0005737,GO:0005764,GO:0005765,GO:0005768,GO:0005773,GO:0005774,GO:0005815,GO:0005856,GO:0006139,GO:0006152,GO:0006163,GO:0006195,GO:0006200,GO:0006355,GO:0006357,GO:0006629,GO:0006725,GO:0006753,GO:0006793,GO:0006796,GO:0006807,GO:0006810,GO:0008150,GO:0008152,GO:…	K05642	K05641,K05642,K05644	Q	Secondary metabolites biosynthesis, transport and catabolism	PF00005, PF12698, PF13304
pdam_00000135	0.132025	0.269083	0.427687	0.723786	0.394425	0.0520392	NA	NA	NA	SAPCD2	Sapcd2: Suppressor APC domain-containing protein 2 (Mus musculus)	NA	GO:0005575,GO:0005622,GO:0005623,GO:0005634,GO:0005730,GO:0005737,GO:0031974,GO:0031981,GO:0043226,GO:0043227,GO:0043228,GO:0043229,GO:0043231,GO:0043232,GO:0043233,GO:0044422,GO:0044424,GO:0044428,GO:0044446,GO:0044464,GO:0070013	NA	NA	NA	NA	PF11414
pdam_00000138	-0.498821	-0.208555	-1.02251	0.0849848	0.544576	1.8925e-06	NA	NA	Downregulated	DMGDH	Dmgdh: Dimethylglycine dehydrogenase%2C mitochondrial (Mus musculus)	GO:0016491, GO:0055114	GO:0000166,GO:0003674,GO:0003824,GO:0005488,GO:0005542,GO:0005575,GO:0005622,GO:0005623,GO:0005737,GO:0005739,GO:0005759,GO:0006066,GO:0006082,GO:0006520,GO:0006544,GO:0006576,GO:0006807,GO:0008150,GO:0008152,GO:0009055,GO:0009056,GO:0009069,GO:0009308,GO:0009310,GO:0009987,GO:0016491,GO:0016597,GO:0016645,GO:0019695,GO:0019752,GO:0019842,GO:0031406,GO:0031974,GO:0034641,GO:0036094,GO:0042402,GO:…	NA	K00301,K00314,K00315,K17509	E	Amino acid transport and metabolism	PF01266, PF01571, PF08669, PF16350, 0
pdam_00000140	-1.69759	-1.1282	-3.27205	0.00741322	0.0926138	1.64618e-10	Downregulated	NA	Downregulated	OIT3	Oit3: Oncoprotein-induced transcript 3 protein (Rattus norvegicus)	GO:0005509	GO:0005575,GO:0005622,GO:0005623,GO:0005634,GO:0005635,GO:0012505,GO:0031967,GO:0031975,GO:0043226,GO:0043227,GO:0043229,GO:0043231,GO:0044422,GO:0044424,GO:0044428,GO:0044446,GO:0044464	NA	NA	T	Signal transduction mechanisms	PF00100, PF12662, PF14670
pdam_00000142	-2.8684	0.831135	-0.539442	0.024749	0.617244	0.645318	Downregulated	NA	NA	NA	unknown function	NA	NA	NA	NA	NA	NA	NA
pdam_00000146	-1.86334	-0.202463	-0.909135	0.00244763	0.841057	0.0926989	Downregulated	NA	NA	NA	unknown function	NA	NA	NA	NA	NA	NA	NA
pdam_00000149	-0.0321414	-0.0892182	0.129429	0.866392	0.580012	0.224155	NA	NA	NA	NDUFS7	NDUFS7: NADH dehydrogenase [ubiquinone] iron-sulfur protein 7%2C mitochondrial (Bos taurus)	GO:0008137, GO:0048038, GO:0051536, GO:0051539, GO:0055114	GO:0000003,GO:0000302,GO:0002119,GO:0002164,GO:0003006,GO:0003674,GO:0003824,GO:0003954,GO:0005488,GO:0005575,GO:0005622,GO:0005623,GO:0005737,GO:0005739,GO:0005740,GO:0005743,GO:0005746,GO:0005747,GO:0006091,GO:0006119,GO:0006120,GO:0006461,GO:0006793,GO:0006796,GO:0006950,GO:0006979,GO:0006996,GO:0007005,GO:0007275,GO:0007548,GO:0007568,GO:0008137,GO:0008150,GO:0008152,GO:0008270,GO:0008340,GO:…	K00331	K03940	C	Energy production and conversion	PF01058
pdam_00000150	-0.575878	-0.0874635	-0.488312	0.0281988	0.814082	0.0199983	Downregulated	NA	Downregulated	NA	Matn4: Matrilin-4 (Mus musculus)	NA	GO:0000003,GO:0000578,GO:0003002,GO:0003006,GO:0007275,GO:0007276,GO:0007292,GO:0007304,GO:0007305,GO:0007350,GO:0007351,GO:0007354,GO:0007362,GO:0007389,GO:0008150,GO:0008595,GO:0009653,GO:0009790,GO:0009798,GO:0009880,GO:0009948,GO:0009952,GO:0009987,GO:0010927,GO:0016043,GO:0019953,GO:0022412,GO:0022414,GO:0022607,GO:0030154,GO:0030198,GO:0030703,GO:0030704,GO:0030707,GO:0032501,GO:0032502,GO:…	NA	K17495	NA	NA	PF00024, PF00092
pdam_00000154	-0.0752965	0.339646	0.653793	0.861343	0.270032	0.00327275	NA	NA	Upregulated	NA	CLN3: Battenin (Canis lupus familiaris)	GO:0016020	NA	NA	K12389	I	Lipid transport and metabolism	PF02487
pdam_00000156	0.250827	0.186071	0.491625	0.185636	0.33676	0.000240123	NA	NA	Upregulated	ZFYVE16	Zfyve16: Zinc finger FYVE domain-containing protein 16 (Mus musculus)	GO:0046872	GO:0003674,GO:0005102,GO:0005126,GO:0005160,GO:0005215,GO:0005488,GO:0005515,GO:0005543,GO:0005545,GO:0005547,GO:0005575,GO:0005622,GO:0005623,GO:0005737,GO:0005768,GO:0005769,GO:0006355,GO:0006357,GO:0006605,GO:0006622,GO:0006623,GO:0006810,GO:0006886,GO:0006996,GO:0007034,GO:0007041,GO:0007154,GO:0007165,GO:0007166,GO:0007167,GO:0007178,GO:0007179,GO:0008104,GO:0008150,GO:0008157,GO:0008289,GO:…	NA	K04679	V	Defense mechanisms	PF01363, PF11979
pdam_00000157	-0.549736	0.680705	1.13597	0.295797	0.152343	0.00159288	NA	NA	Upregulated	NA	unknown function	NA	NA	NA	NA	NA	NA	NA
pdam_00000158	0.178437	0.277824	0.187925	0.527637	0.2636	0.337898	NA	NA	NA	ZCCHC9	ZCCHC9: Zinc finger CCHC domain-containing protein 9 (Homo sapiens)	GO:0003676, GO:0008270	GO:0000003,GO:0003006,GO:0005575,GO:0005622,GO:0005623,GO:0005634,GO:0005730,GO:0006810,GO:0006897,GO:0006898,GO:0007275,GO:0007548,GO:0008150,GO:0010921,GO:0010923,GO:0016192,GO:0019220,GO:0019222,GO:0022414,GO:0031323,GO:0031974,GO:0031981,GO:0032501,GO:0032502,GO:0035303,GO:0040008,GO:0040009,GO:0040010,GO:0040011,GO:0040035,GO:0043086,GO:0043226,GO:0043227,GO:0043228,GO:0043229,GO:0043231,GO:…	K17578	K05765,K17578	O	Posttranslational modification, protein turnover, chaperones	PF00098
pdam_00000159	-0.0610356	-0.120647	-0.365664	0.749415	0.462391	0.000807045	NA	NA	Downregulated	PIK3C3	Pik3c3: Phosphatidylinositol 3-kinase catalytic subunit type 3 (Mus musculus)	GO:0005488, GO:0016301, GO:0046854, GO:0048015	GO:0000003,GO:0000045,GO:0000322,GO:0000323,GO:0000324,GO:0000329,GO:0000407,GO:0000910,GO:0001101,GO:0002119,GO:0002164,GO:0002376,GO:0003006,GO:0003674,GO:0003824,GO:0004672,GO:0005575,GO:0005622,GO:0005623,GO:0005634,GO:0005635,GO:0005640,GO:0005737,GO:0005768,GO:0005770,GO:0005773,GO:0005774,GO:0005777,GO:0005829,GO:0005942,GO:0006355,GO:0006357,GO:0006403,GO:0006464,GO:0006468,GO:0006605,GO:…	K00914	K00914,K02911	T	Signal transduction mechanisms	PF00454, PF00613, PF00792
pdam_00000160	0.121442	0.0023457	-0.121223	0.567214	0.995512	0.411545	NA	NA	NA	PMF1	PMF1: Polyamine-modulated factor 1 (Homo sapiens)	NA	GO:0000236,GO:0000444,GO:0000775,GO:0000776,GO:0000777,GO:0000779,GO:0000793,GO:0000988,GO:0000989,GO:0003674,GO:0003712,GO:0003713,GO:0005575,GO:0005622,GO:0005623,GO:0005634,GO:0005654,GO:0005667,GO:0005694,GO:0005737,GO:0005829,GO:0006139,GO:0006351,GO:0006366,GO:0006725,GO:0006807,GO:0007049,GO:0007059,GO:0008150,GO:0008152,GO:0009058,GO:0009059,GO:0009889,GO:0009987,GO:0010467,GO:0010556,GO:…	NA	K11546	K	Transcription	PF03980
pdam_00000161	-0.0900067	-0.141262	-0.160403	0.708714	0.508469	0.287885	NA	NA	NA	FG09902.1	At2g33255: Haloacid dehalogenase-like hydrolase domain-containing protein At2g33255 (Arabidopsis thaliana)	GO:0008152, GO:0016787	GO:0005575,GO:0005622,GO:0005623,GO:0005634,GO:0005737,GO:0009507,GO:0009536,GO:0043226,GO:0043227,GO:0043229,GO:0043231,GO:0044424,GO:0044444,GO:0044464	NA	NA	NA	NA	PF13419
pdam_00000162	0.0283712	-0.0113414	0.059214	0.906552	0.969659	0.67578	NA	NA	NA	SLC25A38	slc25a38: Solute carrier family 25 member 38 (Xenopus laevis)	GO:0005215, GO:0005739, GO:0006810, GO:0055085	GO:0002262,GO:0002376,GO:0002520,GO:0003674,GO:0005215,GO:0005575,GO:0005622,GO:0005623,GO:0005737,GO:0005739,GO:0005740,GO:0005743,GO:0006725,GO:0006778,GO:0006779,GO:0006783,GO:0006807,GO:0006810,GO:0006839,GO:0006950,GO:0007275,GO:0008150,GO:0008152,GO:0009058,GO:0009636,GO:0009987,GO:0010035,GO:0010038,GO:0016020,GO:0016021,GO:0018130,GO:0019438,GO:0019538,GO:0019866,GO:0020027,GO:0022857,GO:…	K15118	K15118	C	Energy production and conversion	PF001536
pdam_00000163	-0.00261438	0.190292	0.335293	0.992976	0.334402	0.0162384	NA	NA	Upregulated	PIAS2	Pias1: E3 SUMO-protein ligase PIAS1 (Mus musculus)	GO:0008270, GO:0019789	GO:0000003,GO:0000075,GO:0000077,GO:0000122,GO:0000715,GO:0000781,GO:0000988,GO:0000989,GO:0001085,GO:0001654,GO:0001817,GO:0001818,GO:0001959,GO:0001960,GO:0002376,GO:0002520,GO:0002682,GO:0003006,GO:0003674,GO:0003676,GO:0003677,GO:0003712,GO:0003713,GO:0003714,GO:0003824,GO:0005102,GO:0005488,GO:0005515,GO:0005575,GO:0005622,GO:0005623,GO:0005634,GO:0005652,GO:0005654,GO:0005694,GO:0005700,GO:…	K04706	K04706,K16063,K16064,K16065	K	Transcription	PF02891, PF14324
pdam_00000165	0.173901	0.0913109	-0.00209683	0.261055	0.603572	0.98768	NA	NA	NA	PDE8B	PDE8B: High affinity cAMP-specific and IBMX-insensitive 3'%2C5'-cyclic phosphodiesterase 8B (Homo sapiens)	GO:0004114, GO:0007165, GO:0008081	GO:0000902,GO:0000904,GO:0002791,GO:0002792,GO:0003674,GO:0003824,GO:0004112,GO:0004114,GO:0004115,GO:0005575,GO:0005622,GO:0005623,GO:0005737,GO:0005829,GO:0006139,GO:0006163,GO:0006725,GO:0006753,GO:0006793,GO:0006796,GO:0006807,GO:0006928,GO:0006935,GO:0007275,GO:0007399,GO:0007409,GO:0007411,GO:0007498,GO:0008081,GO:0008150,GO:0008152,GO:0009117,GO:0009150,GO:0009187,GO:0009259,GO:0009605,GO:…	K18437	K01120,K18437	T	Signal transduction mechanisms	PF00233, PF08629, PF134264
pdam_00000167	-0.559261	-0.109514	-0.272994	0.000537753	0.643205	0.0622873	Downregulated	NA	NA	SSR2	SSR2: Translocon-associated protein subunit beta (Canis lupus familiaris)	GO:0005783, GO:0016021	GO:0003674,GO:0005048,GO:0005488,GO:0005575,GO:0005622,GO:0005623,GO:0005737,GO:0005773,GO:0005774,GO:0005783,GO:0005786,GO:0005789,GO:0005794,GO:0005811,GO:0005856,GO:0005875,GO:0005911,GO:0006412,GO:0006605,GO:0006612,GO:0006613,GO:0006614,GO:0006621,GO:0006810,GO:0006886,GO:0007275,GO:0008104,GO:0008150,GO:0008152,GO:0009058,GO:0009059,GO:0009506,GO:0009790,GO:0009792,GO:0009987,GO:0010467,GO:…	K13250	K03521,K10841,K13250	U	Intracellular trafficking, secretion, and vesicular transport	PF05753
pdam_00000168	-0.117764	-0.084034	-0.0237762	0.473421	0.632306	0.851736	NA	NA	NA	GNB5	GNB5: Guanine nucleotide-binding protein subunit beta-5 (Pongo abelii)	GO:0005515, GO:0007165	GO:0003674,GO:0003824,GO:0003924,GO:0004871,GO:0005575,GO:0005622,GO:0005623,GO:0005634,GO:0005737,GO:0005829,GO:0005834,GO:0005886,GO:0006139,GO:0006152,GO:0006163,GO:0006184,GO:0006195,GO:0006725,GO:0006753,GO:0006793,GO:0006796,GO:0006807,GO:0007154,GO:0007165,GO:0007166,GO:0007186,GO:0007212,GO:0007213,GO:0007610,GO:0007631,GO:0008150,GO:0008152,GO:0008277,GO:0009056,GO:0009057,GO:0009116,GO:…	K04539	K04539	NA	NA	PF00400
pdam_00000170	-0.27557	-0.0193612	0.0192893	0.287968	0.964133	0.930827	NA	NA	NA	SPAG8	Spag8: Sperm-associated antigen 8 (Mus musculus)	GO:0008017	GO:0001669,GO:0005575,GO:0005622,GO:0005623,GO:0005634,GO:0005737,GO:0006355,GO:0006357,GO:0008150,GO:0009889,GO:0009891,GO:0009893,GO:0010468,GO:0010556,GO:0010557,GO:0010604,GO:0010628,GO:0016020,GO:0016023,GO:0019219,GO:0019222,GO:0030141,GO:0031323,GO:0031325,GO:0031326,GO:0031328,GO:0031410,GO:0031982,GO:0031988,GO:0032092,GO:0043226,GO:0043227,GO:0043229,GO:0043231,GO:0043393,GO:0044093,GO:…	NA	NA	NA	NA	NA
pdam_00000171	0.0417131	0.0453415	0.0735937	0.718859	0.683733	0.306731	NA	NA	NA	APBA1	APBA1: Amyloid beta A4 precursor protein-binding family A member 1 (Homo sapiens)	GO:0005515	GO:0000138,GO:0001505,GO:0001540,GO:0001654,GO:0001701,GO:0003001,GO:0003008,GO:0003674,GO:0004857,GO:0005488,GO:0005515,GO:0005543,GO:0005546,GO:0005575,GO:0005622,GO:0005623,GO:0005634,GO:0005737,GO:0005794,GO:0005795,GO:0005798,GO:0005886,GO:0006461,GO:0006810,GO:0006811,GO:0006820,GO:0006835,GO:0006836,GO:0006865,GO:0006886,GO:0006887,GO:0006903,GO:0006904,GO:0006928,GO:0007017,GO:0007018,GO:…	K04531	K04531,K20055	O	Posttranslational modification, protein turnover, chaperones	PF00595, PF00640
pdam_00000187	0.224064	0.185311	0.691065	0.331738	0.426994	6.79732e-06	NA	NA	Upregulated	GRPEL1	GRPEL1: GrpE protein homolog 1%2C mitochondrial (Pongo abelii)	GO:0000774, GO:0006457, GO:0042803, GO:0051087	GO:0000166,GO:0000774,GO:0001405,GO:0001882,GO:0001883,GO:0002119,GO:0002164,GO:0003674,GO:0005488,GO:0005507,GO:0005515,GO:0005524,GO:0005575,GO:0005622,GO:0005623,GO:0005737,GO:0005739,GO:0005740,GO:0005743,GO:0005744,GO:0005759,GO:0006457,GO:0006605,GO:0006626,GO:0006810,GO:0006839,GO:0006886,GO:0006897,GO:0006898,GO:0006950,GO:0006996,GO:0007005,GO:0007275,GO:0007399,GO:0008104,GO:0008150,GO:…	K03687	K03687	O	Posttranslational modification, protein turnover, chaperones	PF01025
pdam_00000188	0.285963	0.060804	-0.137536	0.272525	0.865531	0.499135	NA	NA	NA	SET	SET: Protein SET (Homo sapiens)	GO:0005634, GO:0006334	GO:0000228,GO:0000726,GO:0000785,GO:0000790,GO:0003674,GO:0004857,GO:0004864,GO:0005488,GO:0005515,GO:0005575,GO:0005622,GO:0005623,GO:0005634,GO:0005654,GO:0005694,GO:0005737,GO:0005783,GO:0005829,GO:0006139,GO:0006259,GO:0006260,GO:0006281,GO:0006302,GO:0006303,GO:0006323,GO:0006325,GO:0006333,GO:0006334,GO:0006337,GO:0006355,GO:0006725,GO:0006807,GO:0006810,GO:0006913,GO:0006950,GO:0006974,GO:…	K11290	K11290	L	Replication, recombination and repair	PF00956
pdam_00000189	-0.10301	-0.194665	-0.344089	0.237064	0.00430178	1.29855e-08	NA	Downregulated	Downregulated	KIF1B	unc-104: Kinesin-like protein unc-104 (Drosophila pseudoobscura pseudoobscura)	GO:0003777, GO:0005515, GO:0005524, GO:0007018, GO:0008017	GO:0000003,GO:0000166,GO:0000902,GO:0000904,GO:0001558,GO:0002119,GO:0002164,GO:0003008,GO:0003674,GO:0003774,GO:0003777,GO:0003824,GO:0004616,GO:0005102,GO:0005179,GO:0005184,GO:0005488,GO:0005515,GO:0005543,GO:0005546,GO:0005575,GO:0005576,GO:0005622,GO:0005623,GO:0005634,GO:0005737,GO:0005739,GO:0005768,GO:0005769,GO:0005783,GO:0005794,GO:0005856,GO:0005871,GO:0005874,GO:0005875,GO:0005881,GO:…	K10392	K10392,K17914	Z	Cytoskeleton	PF00225, PF12423, PF12473, PF16183
pdam_00000190	0.13328	0.0587604	-0.544683	0.744281	0.903508	0.0220423	NA	NA	Downregulated	GAPVD1	GAPVD1: GTPase-activating protein and VPS9 domain-containing protein 1 (Bos taurus)	GO:0007165, GO:0043087	GO:0003674,GO:0005083,GO:0005085,GO:0005088,GO:0005488,GO:0005515,GO:0005575,GO:0005622,GO:0005623,GO:0005737,GO:0005768,GO:0005769,GO:0005829,GO:0005886,GO:0006140,GO:0006810,GO:0006897,GO:0008150,GO:0009118,GO:0009894,GO:0009966,GO:0010646,GO:0016020,GO:0016023,GO:0016192,GO:0017016,GO:0017112,GO:0017137,GO:0018996,GO:0019219,GO:0019220,GO:0019222,GO:0019899,GO:0023051,GO:0030100,GO:0030135,GO:…	NA	NA	U	Intracellular trafficking, secretion, and vesicular transport	PF00616, PF022043
pdam_00000191	0.14521	0.18476	-0.0609934	0.338292	0.180295	0.607661	NA	NA	NA	PBX3	Pbx1: Pre-B-cell leukemia transcription factor 1 (Mus musculus)	GO:0003677, GO:0003700, GO:0005634, GO:0006355, GO:0043565	GO:0000003,GO:0000060,GO:0000803,GO:0000902,GO:0000904,GO:0000981,GO:0000982,GO:0000988,GO:0000989,GO:0001071,GO:0001077,GO:0001228,GO:0001501,GO:0001654,GO:0001655,GO:0001657,GO:0001658,GO:0001667,GO:0001704,GO:0001707,GO:0001708,GO:0001710,GO:0001741,GO:0001742,GO:0001755,GO:0001763,GO:0001764,GO:0001837,GO:0001944,GO:0002009,GO:0002087,GO:0002119,GO:0002164,GO:0002376,GO:0002520,GO:0002521,GO:…	K09355	K09355,K15609,K15610,K15611	K	Transcription	PF00046, PF03792
pdam_00000192	-0.112869	-0.321155	-0.133926	0.755967	0.259687	0.568223	NA	NA	NA	NA	Grm8: Metabotropic glutamate receptor 8 (Rattus norvegicus)	GO:0004930, GO:0007186, GO:0016021	NA	NA	NA	U	Intracellular trafficking, secretion, and vesicular transport	PF00003, PF01094, PF07562
pdam_00000196	-0.0745346	-0.119177	-0.227493	0.648736	0.40994	0.0219682	NA	NA	Downregulated	AKAP13	ARHGEF18: Rho guanine nucleotide exchange factor 18 (Homo sapiens)	GO:0005089, GO:0035023	GO:0000132,GO:0000226,GO:0000278,GO:0000902,GO:0000904,GO:0001726,GO:0001932,GO:0003674,GO:0005083,GO:0005085,GO:0005088,GO:0005089,GO:0005198,GO:0005488,GO:0005515,GO:0005575,GO:0005622,GO:0005623,GO:0005737,GO:0005794,GO:0005819,GO:0005829,GO:0005856,GO:0005874,GO:0005886,GO:0005911,GO:0005923,GO:0006355,GO:0006810,GO:0006886,GO:0006913,GO:0006915,GO:0006950,GO:0006970,GO:0006972,GO:0006996,GO:…	K21066	K12791,K16529	T	Signal transduction mechanisms	PF00621
pdam_00000197	-0.102385	-0.18959	0.0883378	0.771345	0.550787	0.704467	NA	NA	NA	NA	pigs: GAS2-like protein pickled eggs (Drosophila melanogaster)	GO:0005515, GO:0005856, GO:0008017, GO:0008093	NA	NA	NA	Z	Cytoskeleton	PF00307, PF021875
pdam_00000199	0.232399	0.048668	-0.500412	0.612967	0.936046	0.0857993	NA	NA	NA	NA	KLHDC1: Kelch domain-containing protein 1 (Homo sapiens)	GO:0005515	NA	NA	NA	NA	NA	PF01344, PF13418, PF138541
pdam_00000201	-0.0623375	0.110012	0.269661	0.839675	0.697698	0.118214	NA	NA	NA	MYO1E	Myo1e: Unconventional myosin-Ie (Mus musculus)	GO:0003774, GO:0005515, GO:0005524, GO:0016459	GO:0000003,GO:0000146,GO:0000147,GO:0000166,GO:0000282,GO:0000910,GO:0001568,GO:0001570,GO:0001655,GO:0001701,GO:0001822,GO:0001882,GO:0001883,GO:0001891,GO:0001944,GO:0002064,GO:0002376,GO:0002520,GO:0003006,GO:0003008,GO:0003014,GO:0003094,GO:0003674,GO:0003774,GO:0003779,GO:0003824,GO:0005488,GO:0005515,GO:0005516,GO:0005524,GO:0005543,GO:0005575,GO:0005622,GO:0005623,GO:0005628,GO:0005737,GO:…	K10356	K10356	Z	Cytoskeleton	PF00063, PF06017, PF14604
pdam_00000202	-0.0698875	-0.0272623	0.163157	0.736265	0.909742	0.188599	NA	NA	NA	CCDC112	CCDC112: Coiled-coil domain-containing protein 112 (Homo sapiens)	NA	NA	NA	NA	NA	NA	NA
pdam_00000203	0.118447	0.205034	0.590092	0.6866	0.424224	0.000536167	NA	NA	Upregulated	PSMA1	Psma1: Proteasome subunit alpha type-1 (Mus musculus)	GO:0004175, GO:0004298, GO:0005839, GO:0006511, GO:0019773, GO:0051603	GO:0000003,GO:0000075,GO:0000077,GO:0000082,GO:0000084,GO:0000209,GO:0000278,GO:0000502,GO:0001530,GO:0001673,GO:0001703,GO:0002064,GO:0002119,GO:0002164,GO:0002376,GO:0002474,GO:0002478,GO:0002479,GO:0002682,GO:0002683,GO:0002861,GO:0002862,GO:0003006,GO:0003674,GO:0003676,GO:0003723,GO:0003824,GO:0004175,GO:0005488,GO:0005515,GO:0005575,GO:0005622,GO:0005623,GO:0005634,GO:0005654,GO:0005737,GO:…	K02725	K02725,K13141	O	Posttranslational modification, protein turnover, chaperones	PF00227, PF10584
pdam_00000204	0.250584	0.101101	-0.250085	0.507075	0.828698	0.348731	NA	NA	NA	CCNB2	G2/mitotic-specific cyclin-B (Hydra viridissima)	GO:0005634	GO:0000003,GO:0000070,GO:0000075,GO:0000082,GO:0000086,GO:0000090,GO:0000092,GO:0000226,GO:0000228,GO:0000236,GO:0000278,GO:0000279,GO:0000280,GO:0000281,GO:0000307,GO:0000775,GO:0000776,GO:0000777,GO:0000778,GO:0000779,GO:0000780,GO:0000793,GO:0000794,GO:0000819,GO:0000902,GO:0000904,GO:0000910,GO:0000922,GO:0000940,GO:0000942,GO:0001556,GO:0001666,GO:0001700,GO:0001701,GO:0001776,GO:0001837,GO:…	K21770	K05868	D	Cell cycle control, cell division, chromosome partitioning	PF00134, PF02984
pdam_00000206	0.233841	0.250513	0.164373	0.317864	0.261	0.34946	NA	NA	NA	CSK	CSK: Tyrosine-protein kinase CSK (Gallus gallus)	GO:0004672, GO:0004713, GO:0005515, GO:0005524, GO:0006468	GO:0000003,GO:0000166,GO:0001775,GO:0001817,GO:0001818,GO:0001882,GO:0001883,GO:0001894,GO:0001932,GO:0001934,GO:0002009,GO:0002119,GO:0002164,GO:0002253,GO:0002376,GO:0002429,GO:0002682,GO:0002684,GO:0002694,GO:0002696,GO:0002757,GO:0002764,GO:0002768,GO:0003006,GO:0003674,GO:0003824,GO:0004672,GO:0004713,GO:0005488,GO:0005515,GO:0005524,GO:0005575,GO:0005622,GO:0005623,GO:0005634,GO:0005737,GO:…	K05728	K05728,K08888	T	Signal transduction mechanisms	PF00017, PF00018, PF07714
pdam_00000209	0.296391	0.218882	0.18726	0.3575	0.523802	0.443041	NA	NA	NA	NA	unknown function	NA	NA	NA	NA	U	Intracellular trafficking, secretion, and vesicular transport	NA
pdam_00000210	-0.0473546	-0.159256	-0.429362	0.865637	0.467638	0.00411679	NA	NA	Downregulated	NA	unknown function	NA	NA	NA	NA	NA	NA	NA
pdam_00000211	-0.104806	0.273485	-0.462348	0.857222	0.578237	0.156069	NA	NA	NA	SLFN11	SLFN13: Schlafen family member 13 (Homo sapiens)	GO:0005524	GO:0000049,GO:0002252,GO:0002376,GO:0003674,GO:0003676,GO:0003723,GO:0005488,GO:0005575,GO:0005622,GO:0005623,GO:0005634,GO:0006950,GO:0006952,GO:0008150,GO:0009607,GO:0009615,GO:0043226,GO:0043227,GO:0043229,GO:0043231,GO:0044424,GO:0044464,GO:0050896,GO:0051607,GO:0051704,GO:0051707,GO:0097159,GO:1901363	NA	NA	NA	NA	PF04326
pdam_00000216	-0.375097	-0.292116	-0.634792	0.1979	0.308308	0.00252358	NA	NA	Downregulated	NA	Hrh2: Histamine H2 receptor (Mus musculus)	GO:0004930, GO:0007186, GO:0016021	NA	NA	NA	U	Intracellular trafficking, secretion, and vesicular transport	PF00001
pdam_00000218	-0.844626	-1.5274	-2.68667	0.0949616	0.000157973	3.89415e-13	NA	Downregulated	Downregulated	NA	Acidic skeletal organic matrix protein (Acropora millepora)	NA	NA	NA	NA	NA	NA	NA
pdam_00000219	0.042748	-0.0840162	-0.061768	0.840791	0.656055	0.638884	NA	NA	NA	STK31	mrd1: Multiple RNA-binding domain-containing protein 1 (Neosartorya fumigata (strain ATCC MYA-4609 / Af293 / CBS 101355 / FGSC A1100))	GO:0003676	NA	NA	K16316	T	Signal transduction mechanisms	PF00076, PF00567, PF12872
pdam_00000220	0.00333627	0.185758	0.470322	0.99442	0.594625	0.0316278	NA	NA	Upregulated	HIS3	HIS3: Imidazoleglycerol-phosphate dehydratase (Candida glabrata (strain ATCC 2001 / CBS 138 / JCM 3761 / NBRC 0622 / NRRL Y-65))	GO:0000105, GO:0004424	GO:0000105,GO:0003674,GO:0003824,GO:0004424,GO:0005575,GO:0005622,GO:0005623,GO:0005634,GO:0005737,GO:0005829,GO:0006082,GO:0006520,GO:0006547,GO:0006725,GO:0006807,GO:0008150,GO:0008152,GO:0008652,GO:0009058,GO:0009987,GO:0016053,GO:0016829,GO:0016835,GO:0016836,GO:0018130,GO:0019438,GO:0019752,GO:0034641,GO:0043226,GO:0043227,GO:0043229,GO:0043231,GO:0043436,GO:0044237,GO:0044238,GO:0044249,GO:…	K01693	K01693,K01814,K14713	E	Amino acid transport and metabolism	PF00475
pdam_00000221	-0.0736693	0.152929	0.40963	0.76942	0.4858	0.0039852	NA	NA	Upregulated	CCDC11	cfap53: Cilia- and flagella-associated protein 53 (Danio rerio)	GO:0003341, GO:0060271	NA	NA	NA	NA	NA	PF13868
pdam_00000222	-0.0581821	0.131368	0.236031	0.930306	0.837138	0.522805	NA	NA	NA	NA	unknown function	NA	NA	NA	NA	NA	NA	NA
pdam_00000223	-0.267891	-0.174316	2.18088	0.816472	0.891752	0.000497843	NA	NA	Upregulated	NA	unknown function	NA	NA	NA	NA	NA	NA	NA
pdam_00000227	-0.121025	0.223378	0.373458	0.824734	NA	0.230893	NA	NA	NA	NA	unknown function	NA	NA	NA	NA	NA	NA	NA
pdam_00000228	0.447692	0.296162	0.155649	0.0669339	0.244767	0.457227	NA	NA	NA	NA	unknown function	NA	NA	NA	NA	NA	NA	NA
pdam_00000231	-0.536089	-0.455134	-0.193393	0.140673	0.189091	0.508612	NA	NA	NA	NA	asic-1: Degenerin-like protein asic-1 (Caenorhabditis elegans)	GO:0005272, GO:0006814, GO:0016020	NA	NA	NA	NA	NA	PF00858
pdam_00000233	0.0840756	0.263017	0.215583	0.665563	0.0683255	0.0702715	NA	NA	NA	BTBD1	BTBD2: BTB/POZ domain-containing protein 2 (Homo sapiens)	GO:0005515	GO:0000932,GO:0005575,GO:0005622,GO:0005623,GO:0005737,GO:0008150,GO:0030529,GO:0032991,GO:0035770,GO:0040011,GO:0043226,GO:0043228,GO:0043229,GO:0043232,GO:0043234,GO:0043393,GO:0044424,GO:0044444,GO:0044464,GO:0051098,GO:0065007,GO:0065009	K10477	K10477,K10478	NA	NA	PF00651, PF07707, PF08005
pdam_00000234	-0.12425	0.0792753	-0.0677731	0.610805	0.768914	0.695217	NA	NA	NA	SNAPC3	SNAPC3: snRNA-activating protein complex subunit 3 (Macaca fascicularis)	NA	GO:0000003,GO:0002009,GO:0002119,GO:0002164,GO:0003006,GO:0003674,GO:0003676,GO:0003677,GO:0003681,GO:0005488,GO:0005515,GO:0005575,GO:0005622,GO:0005623,GO:0005634,GO:0005654,GO:0005667,GO:0006139,GO:0006351,GO:0006366,GO:0006383,GO:0006725,GO:0006807,GO:0006810,GO:0006897,GO:0006898,GO:0007275,GO:0007548,GO:0008150,GO:0008152,GO:0009058,GO:0009059,GO:0009301,GO:0009653,GO:0009790,GO:0009791,GO:…	K15210	K15210	K	Transcription	PF12251
pdam_00000235	0.0918774	0.0591576	0.472709	0.693512	0.818818	0.000418761	NA	NA	Upregulated	LYSMD4	lysmd4: LysM and putative peptidoglycan-binding domain-containing protein 4 (Danio rerio)	NA	GO:0005575,GO:0016020	NA	NA	NA	NA	NA
pdam_00000236	0.121017	0.119317	0.273007	0.393259	0.388396	0.00390936	NA	NA	Upregulated	ATP8B1	ATP8B2: Phospholipid-transporting ATPase ID (Homo sapiens)	GO:0000166, GO:0000287, GO:0004012, GO:0005524, GO:0015914, GO:0016021	GO:0003674,GO:0003824,GO:0004012,GO:0005215,GO:0005319,GO:0005548,GO:0005575,GO:0005622,GO:0005623,GO:0005737,GO:0005783,GO:0005886,GO:0005887,GO:0006066,GO:0006139,GO:0006152,GO:0006163,GO:0006195,GO:0006200,GO:0006355,GO:0006629,GO:0006725,GO:0006753,GO:0006793,GO:0006796,GO:0006807,GO:0006810,GO:0006811,GO:0006820,GO:0006869,GO:0008150,GO:0008152,GO:0008202,GO:0009056,GO:0009116,GO:0009117,GO:…	K01530	K01530,K14802	P	Inorganic ion transport and metabolism	PF00122, PF13246, PF16209, PF16212
pdam_00000238	0.0888356	-0.00621979	0.0321192	0.626953	0.981074	0.806743	NA	NA	NA	NA	unknown function	NA	NA	NA	NA	NA	NA	NA
pdam_00000248	-0.0043949	-0.234208	-0.143178	0.991509	0.401146	0.505469	NA	NA	NA	ASRGL1	Asrgl1: Isoaspartyl peptidase/L-asparaginase (Rattus norvegicus)	GO:0004067, GO:0016787	GO:0002165,GO:0003674,GO:0003824,GO:0003948,GO:0004067,GO:0004175,GO:0004298,GO:0005575,GO:0005622,GO:0005623,GO:0005634,GO:0005737,GO:0005829,GO:0005856,GO:0006082,GO:0006520,GO:0006528,GO:0006530,GO:0006807,GO:0007275,GO:0007431,GO:0007435,GO:0007552,GO:0007559,GO:0008150,GO:0008152,GO:0008219,GO:0008233,GO:0008238,GO:0008242,GO:0008798,GO:0009056,GO:0009063,GO:0009064,GO:0009065,GO:0009066,GO:…	K13051	K01424,K08657,K13051	E	Amino acid transport and metabolism	PF01112
pdam_00000252	-0.964036	1.1868	-0.0286469	0.270099	0.132395	0.970224	NA	NA	NA	NA	Galaxin (Acropora millepora)	NA	GO:0007275,GO:0008150,GO:0009790,GO:0009792,GO:0032501,GO:0032502,GO:0044699,GO:0044707,GO:0044767,GO:0048856	NA	NA	T	Signal transduction mechanisms	NA
pdam_00000253	0.318737	-0.0339369	-0.00919081	0.111298	0.911761	0.96158	NA	NA	NA	ESCO1	ESCO1: N-acetyltransferase ESCO1 (Homo sapiens)	NA	GO:0000070,GO:0000226,GO:0000228,GO:0000278,GO:0000280,GO:0000785,GO:0000790,GO:0000819,GO:0003674,GO:0003824,GO:0005575,GO:0005622,GO:0005623,GO:0005634,GO:0005694,GO:0006275,GO:0006464,GO:0006473,GO:0006915,GO:0006996,GO:0007010,GO:0007017,GO:0007049,GO:0007051,GO:0007052,GO:0007059,GO:0007062,GO:0007064,GO:0007067,GO:0007275,GO:0007507,GO:0008150,GO:0008152,GO:0008219,GO:0009889,GO:0009987,GO:…	K11268	K11268	L	Replication, recombination and repair	PF13878, PF13880
pdam_00000254	0.442408	-0.351229	-0.837572	0.250807	0.37657	0.00258478	NA	NA	Downregulated	DNA2	Dna2: DNA replication ATP-dependent helicase/nuclease DNA2 (Rattus norvegicus)	GO:0017108, GO:0033567, GO:0043142	GO:0000002,GO:0000003,GO:0000014,GO:0000075,GO:0000076,GO:0000077,GO:0000084,GO:0000166,GO:0000228,GO:0000278,GO:0000706,GO:0000722,GO:0000723,GO:0000729,GO:0000733,GO:0000738,GO:0000781,GO:0000784,GO:0001302,GO:0001882,GO:0001883,GO:0003674,GO:0003676,GO:0003677,GO:0003678,GO:0003824,GO:0004003,GO:0004386,GO:0004518,GO:0004519,GO:0004520,GO:0004527,GO:0004536,GO:0005488,GO:0005524,GO:0005575,GO:…	K10742	K10742,K15376	L	Replication, recombination and repair	PF08696, PF13086, PF13087
pdam_00000256	-0.525408	-0.0152238	-0.474897	0.0271328	0.973265	0.0125349	Downregulated	NA	Downregulated	RPS12	RPS12: 40S ribosomal protein S12 (Gallus gallus)	GO:0003735, GO:0005622, GO:0005840, GO:0006412	GO:0000003,GO:0000184,GO:0000956,GO:0002119,GO:0002164,GO:0002181,GO:0003674,GO:0003735,GO:0005198,GO:0005575,GO:0005622,GO:0005623,GO:0005634,GO:0005737,GO:0005829,GO:0005840,GO:0006139,GO:0006401,GO:0006402,GO:0006412,GO:0006413,GO:0006414,GO:0006415,GO:0006605,GO:0006612,GO:0006613,GO:0006614,GO:0006725,GO:0006807,GO:0006810,GO:0006886,GO:0006950,GO:0006970,GO:0007275,GO:0008104,GO:0008150,GO:…	K02951	K02951	J	Translation, ribosomal structure and biogenesis	PF01248
pdam_00000257	-0.246819	0.342819	0.29882	0.258964	0.0679847	0.0535315	NA	NA	NA	NA	LITAF: Lipopolysaccharide-induced tumor necrosis factor-alpha factor homolog (Gallus gallus)	NA	NA	K19363	NA	NA	NA	PF10601
pdam_00000258	-0.0779114	0.0331412	0.597231	0.864162	0.950238	0.0130895	NA	NA	Upregulated	NA	Epb41l3: Band 4.1-like protein 3 (Mus musculus)	GO:0005856	NA	NA	K06107	T	Signal transduction mechanisms	PF00373, PF08736, PF09379, PF09380
pdam_00000259	0.130497	0.0783069	0.341882	0.424874	0.657871	0.00130936	NA	NA	Upregulated	PEX13	PEX13: Peroxisomal membrane protein PEX13 (Bos taurus)	GO:0005515, GO:0005777, GO:0016021, GO:0016560	GO:0000003,GO:0000268,GO:0001561,GO:0001764,GO:0001967,GO:0002119,GO:0002164,GO:0003674,GO:0005048,GO:0005488,GO:0005515,GO:0005575,GO:0005622,GO:0005623,GO:0005737,GO:0005777,GO:0005778,GO:0005779,GO:0006082,GO:0006461,GO:0006605,GO:0006625,GO:0006629,GO:0006631,GO:0006810,GO:0006886,GO:0006928,GO:0006996,GO:0007017,GO:0007031,GO:0007275,GO:0007276,GO:0007283,GO:0007399,GO:0007417,GO:0007420,GO:…	K13344	K13344	U	Intracellular trafficking, secretion, and vesicular transport	PF04088, PF14604
pdam_00000260	-0.127116	-0.0474762	-0.859221	0.802969	0.938395	0.00230014	NA	NA	Downregulated	RRM2B	Rrm2: Ribonucleoside-diphosphate reductase subunit M2 (Mus musculus)	GO:0009263, GO:0055114	GO:0000002,GO:0000003,GO:0000082,GO:0000083,GO:0000278,GO:0001655,GO:0001822,GO:0002009,GO:0003006,GO:0003008,GO:0003014,GO:0003674,GO:0003824,GO:0004748,GO:0005575,GO:0005622,GO:0005623,GO:0005634,GO:0005635,GO:0005654,GO:0005737,GO:0005739,GO:0005829,GO:0005971,GO:0006139,GO:0006206,GO:0006213,GO:0006259,GO:0006260,GO:0006261,GO:0006264,GO:0006275,GO:0006281,GO:0006355,GO:0006357,GO:0006461,GO:…	K10808	K00526,K10808	F	Nucleotide transport and metabolism	PF00268
pdam_00000261	-0.145029	-0.0150924	-0.155111	0.516032	0.965686	0.317892	NA	NA	NA	NA	unknown function	NA	NA	NA	NA	NA	NA	PF13385
pdam_00000264	-0.0397867	-0.0869101	-0.418228	0.907215	0.785311	0.0204874	NA	NA	Downregulated	THBS1	thbs3b: Thrombospondin-3b (Danio rerio)	GO:0005509, GO:0005576, GO:0007155, GO:0016020	GO:0000187,GO:0000902,GO:0001501,GO:0001503,GO:0001525,GO:0001568,GO:0001666,GO:0001775,GO:0001786,GO:0001817,GO:0001818,GO:0001819,GO:0001932,GO:0001934,GO:0001936,GO:0001937,GO:0001938,GO:0001944,GO:0001948,GO:0001952,GO:0001953,GO:0001968,GO:0002040,GO:0002376,GO:0002544,GO:0002576,GO:0002577,GO:0002578,GO:0002580,GO:0002581,GO:0002604,GO:0002605,GO:0002682,GO:0002683,GO:0002684,GO:0002685,GO:…	NA	K04659,K16857	W	Extracellular structures	PF00629, PF02412, PF057357
pdam_00000269	0.503634	0.44601	0.688461	0.0988903	0.131685	0.00236682	NA	NA	Upregulated	NA	unknown function	NA	NA	NA	NA	NA	NA	NA
pdam_00000270	0.426996	0.149154	-0.149298	0.152811	0.684016	0.542562	NA	NA	NA	KLF16	SP3: Transcription factor Sp3 (Homo sapiens)	GO:0003676	GO:0000080,GO:0000114,GO:0000278,GO:0000280,GO:0000975,GO:0000976,GO:0000977,GO:0000978,GO:0000980,GO:0000981,GO:0000982,GO:0000987,GO:0000988,GO:0000989,GO:0001010,GO:0001012,GO:0001067,GO:0001071,GO:0001077,GO:0001133,GO:0001134,GO:0001158,GO:0001159,GO:0001228,GO:0003674,GO:0003676,GO:0003677,GO:0003700,GO:0005488,GO:0005515,GO:0005575,GO:0005622,GO:0005623,GO:0005634,GO:0005737,GO:0005829,GO:…	NA	K09202,K09208,K09238	K	Transcription	PF00096
pdam_00000271	0.147909	-0.0125015	-0.507549	0.629138	0.97745	0.00654071	NA	NA	Downregulated	NA	unknown function	NA	NA	NA	NA	NA	NA	NA
pdam_00000272	0.258493	0.0865715	0.369477	0.165882	0.708383	0.00601439	NA	NA	Upregulated	NA	unknown function	NA	NA	NA	NA	NA	NA	NA
pdam_00000274	-0.124408	-0.276408	0.160484	0.82002	0.5634	0.638454	NA	NA	NA	NME6	nme6: Nucleoside diphosphate kinase 6 (Danio rerio)	GO:0004550, GO:0006165, GO:0006183, GO:0006228, GO:0006241	GO:0000166,GO:0000226,GO:0000278,GO:0001558,GO:0001882,GO:0001883,GO:0003674,GO:0003824,GO:0004550,GO:0005488,GO:0005524,GO:0005575,GO:0005622,GO:0005623,GO:0005737,GO:0005739,GO:0006139,GO:0006165,GO:0006725,GO:0006753,GO:0006793,GO:0006796,GO:0006807,GO:0006996,GO:0007010,GO:0007017,GO:0007049,GO:0007051,GO:0007052,GO:0007088,GO:0007275,GO:0007346,GO:0008150,GO:0008152,GO:0009058,GO:0009117,GO:…	K00940	K00940,K19868	F	Nucleotide transport and metabolism	PF00334
pdam_00000275	-0.312327	-0.323412	-0.520458	0.2458	0.201307	0.00599303	NA	NA	Downregulated	TGIF1	Homeobox protein AKR (Gallus gallus)	GO:0003677, GO:0006355	GO:0000122,GO:0000228,GO:0000785,GO:0000790,GO:0000975,GO:0000976,GO:0000977,GO:0000978,GO:0000987,GO:0000988,GO:0000989,GO:0001010,GO:0001012,GO:0001067,GO:0001071,GO:0001085,GO:0001103,GO:0001133,GO:0001134,GO:0001159,GO:0001654,GO:0001838,GO:0001841,GO:0001843,GO:0002009,GO:0003002,GO:0003674,GO:0003676,GO:0003677,GO:0003682,GO:0003700,GO:0003712,GO:0003714,GO:0005488,GO:0005515,GO:0005575,GO:…	K19383	K19383,K19553,K19554	K	Transcription	PF05920
pdam_00000276	-0.104986	-0.304699	-0.655442	0.520266	0.0118016	2.45624e-10	NA	Downregulated	Downregulated	UCKL1	UCKL1: Uridine-cytidine kinase-like 1 (Homo sapiens)	GO:0004849, GO:0005524, GO:0008152, GO:0009116, GO:0016301	GO:0000003,GO:0000922,GO:0003006,GO:0003674,GO:0003824,GO:0004845,GO:0004849,GO:0005575,GO:0005622,GO:0005623,GO:0005634,GO:0005737,GO:0005783,GO:0005815,GO:0005816,GO:0005819,GO:0005829,GO:0005856,GO:0006139,GO:0006206,GO:0006213,GO:0006220,GO:0006221,GO:0006222,GO:0006725,GO:0006753,GO:0006793,GO:0006796,GO:0006807,GO:0007275,GO:0007548,GO:0007568,GO:0008150,GO:0008152,GO:0008340,GO:0008655,GO:…	K00876	K00876	F	Nucleotide transport and metabolism	PF00485, PF14681
pdam_00000277	-0.00732674	-0.240491	-0.482052	0.982324	0.295283	0.00333037	NA	NA	Downregulated	UCKL1	UCKL1: Uridine-cytidine kinase-like 1 (Homo sapiens)	GO:0004849, GO:0005524	GO:0000003,GO:0000922,GO:0003006,GO:0003674,GO:0003824,GO:0004845,GO:0004849,GO:0005575,GO:0005622,GO:0005623,GO:0005634,GO:0005737,GO:0005783,GO:0005815,GO:0005816,GO:0005819,GO:0005829,GO:0005856,GO:0006139,GO:0006206,GO:0006213,GO:0006220,GO:0006221,GO:0006222,GO:0006725,GO:0006753,GO:0006793,GO:0006796,GO:0006807,GO:0007275,GO:0007548,GO:0007568,GO:0008150,GO:0008152,GO:0008340,GO:0008655,GO:…	NA	K00876	F	Nucleotide transport and metabolism	PF14681
pdam_00000279	0.0411267	0.140069	0.17136	0.825039	0.329744	0.102839	NA	NA	NA	LTV1	Ltv1: Protein LTV1 homolog (Mus musculus)	NA	GO:0000003,GO:0000054,GO:0000056,GO:0000166,GO:0001882,GO:0001883,GO:0002119,GO:0002164,GO:0003006,GO:0003674,GO:0005488,GO:0005524,GO:0005575,GO:0005622,GO:0005623,GO:0005634,GO:0005737,GO:0005768,GO:0005770,GO:0005829,GO:0006810,GO:0006913,GO:0006950,GO:0006970,GO:0006979,GO:0007275,GO:0007548,GO:0008150,GO:0009628,GO:0009790,GO:0009791,GO:0009792,GO:0009892,GO:0009987,GO:0010008,GO:0010468,GO:…	K14798	K05012,K14798	NA	NA	PF04180
pdam_00000280	0.147055	0.194283	0.24187	0.248877	0.0872197	0.00693735	NA	NA	Upregulated	SMAP2	Smap1: Stromal membrane-associated protein 1 (Mus musculus)	GO:0005096, GO:0005515	GO:0000003,GO:0000988,GO:0000989,GO:0001558,GO:0002119,GO:0002164,GO:0002682,GO:0003006,GO:0003674,GO:0005083,GO:0005096,GO:0005488,GO:0005515,GO:0005575,GO:0005622,GO:0005623,GO:0005634,GO:0005737,GO:0005768,GO:0005794,GO:0005802,GO:0005829,GO:0005856,GO:0005886,GO:0005938,GO:0006140,GO:0006355,GO:0006357,GO:0006810,GO:0006888,GO:0006891,GO:0006897,GO:0007275,GO:0007346,GO:0007624,GO:0008047,GO:…	K12486	K12486	T	Signal transduction mechanisms	PF01412
pdam_00000281	0.347718	0.235452	0.407803	0.184354	0.388806	0.0323222	NA	NA	Upregulated	NA	unknown function	GO:0003824	NA	NA	NA	NA	NA	NA
pdam_00000282	-0.147759	0.0591617	-0.229038	0.558036	0.844138	0.172496	NA	NA	NA	MRGBP	Mrgbp: MRG/MORF4L-binding protein (Mus musculus)	GO:0005634, GO:0006355, GO:0043189	GO:0000123,GO:0000228,GO:0000785,GO:0000790,GO:0002119,GO:0002164,GO:0005575,GO:0005622,GO:0005623,GO:0005634,GO:0005654,GO:0005694,GO:0006139,GO:0006259,GO:0006281,GO:0006325,GO:0006338,GO:0006355,GO:0006357,GO:0006464,GO:0006473,GO:0006475,GO:0006725,GO:0006807,GO:0006950,GO:0006974,GO:0006996,GO:0007275,GO:0007399,GO:0008150,GO:0008152,GO:0009791,GO:0009889,GO:0009892,GO:0009987,GO:0010468,GO:…	K11343	K11343,K11399	NA	NA	PF07904
pdam_00000284	-0.600165	-0.547728	-1.18721	0.125083	0.141447	3.32767e-05	NA	NA	Downregulated	ENPEP	ERAP1: Endoplasmic reticulum aminopeptidase 1 (Homo sapiens)	GO:0005789, GO:0006508, GO:0008217, GO:0008237, GO:0008270, GO:0019885, GO:0070006	GO:0001525,GO:0001568,GO:0001655,GO:0001822,GO:0001944,GO:0001990,GO:0001991,GO:0002002,GO:0002005,GO:0003008,GO:0003013,GO:0003044,GO:0003073,GO:0003081,GO:0003674,GO:0003824,GO:0004177,GO:0005488,GO:0005575,GO:0005622,GO:0005623,GO:0005737,GO:0005886,GO:0005887,GO:0005903,GO:0006403,GO:0006508,GO:0006725,GO:0006810,GO:0006928,GO:0007154,GO:0007267,GO:0007275,GO:0007586,GO:0008015,GO:0008150,GO:…	NA	K11141	NA	NA	PF01433, PF11838
pdam_00000285	-0.041639	-0.069342	0.893826	0.965329	0.946761	0.0623951	NA	NA	NA	NA	Hcrtr2: Orexin receptor type 2 (Mus musculus)	GO:0004930, GO:0007186, GO:0016021	NA	NA	NA	U	Intracellular trafficking, secretion, and vesicular transport	PF00001
pdam_00000286	-0.070997	0.173125	0.327799	0.76403	0.374855	0.0155644	NA	NA	Upregulated	TEKT1	TEKT1: Tektin-1 (Homo sapiens)	GO:0005515	GO:0003674,GO:0005488,GO:0005515,GO:0005575,GO:0005622,GO:0005623,GO:0005737,GO:0005856,GO:0005874,GO:0005875,GO:0005929,GO:0005930,GO:0007017,GO:0008017,GO:0008092,GO:0008150,GO:0009987,GO:0015630,GO:0015631,GO:0031514,GO:0032838,GO:0032991,GO:0035085,GO:0042995,GO:0043226,GO:0043227,GO:0043228,GO:0043229,GO:0043231,GO:0043232,GO:0043234,GO:0044422,GO:0044424,GO:0044430,GO:0044441,GO:0044444,GO:…	K18628	K18628	Z	Cytoskeleton	PF03148, PF09799, PF13176, PF13374, PF13424
pdam_00000288	0.0381398	0.0485233	0.346177	0.890035	0.860073	0.0137863	NA	NA	Upregulated	NDUFS8	Ndufs8: NADH dehydrogenase [ubiquinone] iron-sulfur protein 8%2C mitochondrial (Mus musculus)	GO:0016020, GO:0016651, GO:0051539, GO:0055114	GO:0002119,GO:0002164,GO:0003674,GO:0003824,GO:0003954,GO:0005575,GO:0005622,GO:0005623,GO:0005737,GO:0005739,GO:0005740,GO:0005743,GO:0005746,GO:0005747,GO:0006091,GO:0006119,GO:0006120,GO:0006461,GO:0006793,GO:0006796,GO:0006950,GO:0006979,GO:0006996,GO:0007005,GO:0007010,GO:0007275,GO:0007568,GO:0008137,GO:0008150,GO:0008152,GO:0008340,GO:0009507,GO:0009534,GO:0009535,GO:0009536,GO:0009579,GO:…	K03941	K03941,K05580	C	Energy production and conversion	PF12838
pdam_00000289	0.101197	-0.135178	-0.0901549	0.571814	0.41102	0.477598	NA	NA	NA	SLX1	v1g174298: Structure-specific endonuclease subunit SLX1 homolog (Nematostella vectensis)	GO:0006281, GO:0017108, GO:0033557	GO:0000075,GO:0000077,GO:0000228,GO:0000724,GO:0000725,GO:0000726,GO:0000729,GO:0000738,GO:0000785,GO:0000790,GO:0002119,GO:0002164,GO:0003674,GO:0003824,GO:0004518,GO:0004519,GO:0004520,GO:0004536,GO:0005488,GO:0005515,GO:0005575,GO:0005622,GO:0005623,GO:0005634,GO:0005694,GO:0005730,GO:0006139,GO:0006259,GO:0006260,GO:0006261,GO:0006281,GO:0006302,GO:0006308,GO:0006310,GO:0006725,GO:0006807,GO:…	K15078	K15078	L	Replication, recombination and repair	PF01541
pdam_00000293	0.404196	0.448794	0.220533	0.124493	NA	0.301865	NA	NA	NA	TMEM246	Tmem246: Transmembrane protein 246 (Rattus norvegicus)	NA	GO:0005575,GO:0016020	NA	NA	NA	NA	NA
pdam_00000294	0.00489844	0.172842	0.506588	0.9874	0.422976	0.000404536	NA	NA	Upregulated	TIMM22	Timm22: Mitochondrial import inner membrane translocase subunit Tim22 (Mus musculus)	NA	GO:0000003,GO:0003006,GO:0003674,GO:0005048,GO:0005215,GO:0005488,GO:0005575,GO:0005622,GO:0005623,GO:0005737,GO:0005739,GO:0005740,GO:0005743,GO:0005744,GO:0006605,GO:0006626,GO:0006810,GO:0006839,GO:0006886,GO:0006915,GO:0006996,GO:0007005,GO:0007006,GO:0007007,GO:0007275,GO:0008104,GO:0008150,GO:0008152,GO:0008219,GO:0008320,GO:0008565,GO:0009790,GO:0009791,GO:0009792,GO:0009793,GO:0009987,GO:…	K17790	K00387,K17790	U	Intracellular trafficking, secretion, and vesicular transport	PF02466
pdam_00000295	0.0160232	0.133428	0.165018	0.957627	0.544166	0.278479	NA	NA	NA	DERL2	DERL2: Derlin-2 (Pongo abelii)	GO:0004252, GO:0016021	GO:0000151,GO:0000153,GO:0000835,GO:0000836,GO:0000839,GO:0001558,GO:0001967,GO:0005575,GO:0005622,GO:0005623,GO:0005737,GO:0005768,GO:0005769,GO:0005770,GO:0005783,GO:0005789,GO:0005975,GO:0006464,GO:0006486,GO:0006487,GO:0006508,GO:0006511,GO:0006810,GO:0006886,GO:0006950,GO:0006952,GO:0006984,GO:0006986,GO:0007154,GO:0007165,GO:0007275,GO:0007610,GO:0007631,GO:0008104,GO:0008150,GO:0008152,GO:…	K13989	K13989,K19737	NA	NA	PF04511
pdam_00000296	-0.0354061	0.269678	0.231548	0.890854	0.109209	0.0864748	NA	NA	NA	VPS29	VPS29: Vacuolar protein sorting-associated protein 29 (Homo sapiens)	GO:0030904, GO:0042147	GO:0000003,GO:0003006,GO:0003674,GO:0003824,GO:0004842,GO:0005575,GO:0005622,GO:0005623,GO:0005634,GO:0005737,GO:0005768,GO:0005770,GO:0005771,GO:0005802,GO:0005829,GO:0006464,GO:0006508,GO:0006511,GO:0006605,GO:0006623,GO:0006810,GO:0006886,GO:0006892,GO:0006896,GO:0006950,GO:0007034,GO:0007049,GO:0008104,GO:0008150,GO:0008152,GO:0009056,GO:0009057,GO:0009636,GO:0009653,GO:0009987,GO:0010008,GO:…	K18467	K07095,K18467	U	Intracellular trafficking, secretion, and vesicular transport	PF12850
pdam_00000297	0.105273	0.0744296	0.0062095	0.535761	0.681977	0.964093	NA	NA	NA	SUDS3	SUDS3: Sin3 histone deacetylase corepressor complex component SDS3 (Bos taurus)	NA	GO:0000118,GO:0000122,GO:0000228,GO:0000785,GO:0000790,GO:0003674,GO:0005488,GO:0005515,GO:0005575,GO:0005622,GO:0005623,GO:0005634,GO:0005654,GO:0005694,GO:0005737,GO:0005829,GO:0006325,GO:0006338,GO:0006342,GO:0006355,GO:0006357,GO:0006464,GO:0006476,GO:0006950,GO:0006996,GO:0008150,GO:0008152,GO:0009266,GO:0009408,GO:0009628,GO:0009889,GO:0009890,GO:0009891,GO:0009892,GO:0009893,GO:0009987,GO:…	K19201	K19196,K19201	NA	NA	PF08598
pdam_00000298	0.0311975	0.00933243	0.175949	0.912848	0.979394	0.264902	NA	NA	NA	TAF15	EWSR1: RNA-binding protein EWS (Homo sapiens)	GO:0003676, GO:0003723, GO:0006355	NA	K14651	K13098	NA	NA	PF00076, PF00641
pdam_00000299	0.208596	-0.0640135	0.302891	0.429188	0.85084	0.0920807	NA	NA	NA	NA	unknown function	NA	NA	NA	NA	NA	NA	NA
pdam_00000300	0.159509	0.251541	0.306209	0.372158	0.0996686	0.0113161	NA	NA	Upregulated	RFFL	Rffl: E3 ubiquitin-protein ligase rififylin (Rattus norvegicus)	GO:0003676, GO:0046872	GO:0000278,GO:0000280,GO:0005575,GO:0005622,GO:0005623,GO:0005737,GO:0006810,GO:0006886,GO:0006996,GO:0007049,GO:0007067,GO:0008104,GO:0008150,GO:0009987,GO:0010941,GO:0015031,GO:0016020,GO:0016023,GO:0016043,GO:0022402,GO:0031410,GO:0031982,GO:0031988,GO:0033036,GO:0034613,GO:0042981,GO:0043066,GO:0043067,GO:0043069,GO:0043226,GO:0043227,GO:0043229,GO:0043231,GO:0044424,GO:0044444,GO:0044464,GO:…	K20804	NA	O	Posttranslational modification, protein turnover, chaperones	PF13920
pdam_00000302	0.0939037	0.0910765	0.308042	0.63983	0.642466	0.0102981	NA	NA	Upregulated	C17ORF85	NCBP3: Nuclear cap-binding protein subunit 3 (Gallus gallus)	GO:0000340, GO:0003729	NA	NA	NA	NA	NA	PF10309
pdam_00000303	0.153883	0.195274	0.572387	0.530784	0.390027	0.000181115	NA	NA	Upregulated	TXNL4A	Txnl4a: Thioredoxin-like protein 4A (Mus musculus)	GO:0000398, GO:0005681	GO:0000226,GO:0000245,GO:0000278,GO:0000280,GO:0000375,GO:0000377,GO:0000398,GO:0005575,GO:0005622,GO:0005623,GO:0005634,GO:0005654,GO:0005681,GO:0005682,GO:0005737,GO:0006139,GO:0006396,GO:0006397,GO:0006725,GO:0006807,GO:0006996,GO:0007010,GO:0007017,GO:0007049,GO:0007051,GO:0007052,GO:0007067,GO:0007275,GO:0007399,GO:0008150,GO:0008152,GO:0008380,GO:0009987,GO:0010467,GO:0016043,GO:0016070,GO:…	K12859	K12859	NA	NA	PF02966
pdam_00000304	0.245175	0.0677061	0.565664	0.438316	0.87005	0.00667468	NA	NA	Upregulated	CCDC64B	bicdl1: BICD family-like cargo adapter 1 (Xenopus tropicalis)	NA	GO:0003674,GO:0005488,GO:0005515,GO:0017016,GO:0017137,GO:0019899,GO:0031267,GO:0051020	K16756	K16756	NA	NA	PF04849
pdam_00000306	-0.00275046	0.138774	0.260256	0.988893	0.302163	0.00710527	NA	NA	Upregulated	SMARCB1	smarcb1: SWI/SNF-related matrix-associated actin-dependent regulator of chromatin subfamily B member 1 (Xenopus laevis)	GO:0000228, GO:0006338	GO:0000003,GO:0000122,GO:0000228,GO:0000278,GO:0000429,GO:0000436,GO:0000724,GO:0000725,GO:0000785,GO:0000790,GO:0000803,GO:0000902,GO:0000904,GO:0000988,GO:0000989,GO:0000990,GO:0000991,GO:0001085,GO:0001102,GO:0001700,GO:0001701,GO:0001741,GO:0001824,GO:0001835,GO:0002119,GO:0002164,GO:0002165,GO:0003002,GO:0003006,GO:0003674,GO:0003712,GO:0003713,GO:0005488,GO:0005515,GO:0005575,GO:0005622,GO:…	K11648	K11648	B	Chromatin structure and dynamics	PF04855
pdam_00000307	0.0196356	0.162334	-0.508542	0.972083	0.737755	0.0767561	NA	NA	NA	RASAL1	RASAL1: RasGAP-activating-like protein 1 (Homo sapiens)	GO:0007165, GO:0035556, GO:0043087	GO:0003674,GO:0005083,GO:0005096,GO:0005099,GO:0005488,GO:0005543,GO:0005575,GO:0005622,GO:0005623,GO:0005737,GO:0005886,GO:0006140,GO:0007154,GO:0007165,GO:0008047,GO:0008150,GO:0008289,GO:0009118,GO:0009894,GO:0009898,GO:0009966,GO:0009968,GO:0009987,GO:0010646,GO:0010648,GO:0016020,GO:0019219,GO:0019220,GO:0019222,GO:0023051,GO:0023052,GO:0023057,GO:0030234,GO:0030695,GO:0030811,GO:0031224,GO:…	K17632	K12380,K17630,K17632	T	Signal transduction mechanisms	PF00169, PF00616, PF00779
pdam_00000311	-0.269068	0.0613204	0.00417447	0.598447	0.926353	0.991521	NA	NA	NA	GBP1	GBP2: Guanylate-binding protein 2 (Homo sapiens)	GO:0003924, GO:0005525	GO:0000139,GO:0000166,GO:0001882,GO:0001883,GO:0002376,GO:0003674,GO:0005488,GO:0005525,GO:0005575,GO:0005576,GO:0005622,GO:0005623,GO:0005737,GO:0005794,GO:0005829,GO:0006950,GO:0006952,GO:0006955,GO:0007154,GO:0007165,GO:0007166,GO:0008150,GO:0009987,GO:0010033,GO:0012505,GO:0016020,GO:0017076,GO:0019001,GO:0019221,GO:0023052,GO:0031090,GO:0032549,GO:0032550,GO:0032553,GO:0032555,GO:0032561,GO:…	NA	NA	NA	NA	PF02263
pdam_00000313	0.104117	0.0392437	0.173091	0.558036	0.856341	0.138511	NA	NA	NA	NA	unknown function	NA	NA	NA	NA	NA	NA	NA
pdam_00000315	0.292801	0.036337	0.419554	0.250807	0.923517	0.0199534	NA	NA	Upregulated	NA	esiB: Secretory immunoglobulin A-binding protein EsiB (Escherichia coli O6:H1 (strain CFT073 / ATCC 700928 / UPEC))	NA	NA	K07126	K07126,K14026	NA	NA	PF08238
pdam_00000316	-0.0790566	0.0830422	0.438152	0.732306	0.709838	0.000615365	NA	NA	Upregulated	NA	RAB3A: Ras-related protein Rab-3A (Bos taurus)	GO:0003924, GO:0005525	NA	NA	NA	U	Intracellular trafficking, secretion, and vesicular transport	PF00071
pdam_00000317	-0.0574111	0.0844875	0.164594	0.660282	0.472916	0.037123	NA	NA	Upregulated	OSBP	Osbp2: Oxysterol-binding protein 2 (Mus musculus)	NA	GO:0000003,GO:0000138,GO:0000139,GO:0002064,GO:0003006,GO:0003674,GO:0005215,GO:0005319,GO:0005488,GO:0005496,GO:0005543,GO:0005545,GO:0005575,GO:0005622,GO:0005623,GO:0005634,GO:0005635,GO:0005737,GO:0005768,GO:0005769,GO:0005783,GO:0005794,GO:0005795,GO:0005829,GO:0005886,GO:0005933,GO:0005935,GO:0005938,GO:0006629,GO:0006810,GO:0006869,GO:0006886,GO:0006887,GO:0006897,GO:0006950,GO:0006996,GO:…	K20456	K06867,K17656	T	Signal transduction mechanisms	PF00169, PF012370
pdam_00000318	-0.484702	-0.0541781	0.549175	0.298691	0.937232	0.0954965	NA	NA	NA	TMEM45B	Tmem45b: Transmembrane protein 45B (Rattus norvegicus)	NA	GO:0005575,GO:0005623,GO:0005886,GO:0005887,GO:0016020,GO:0016021,GO:0031224,GO:0031226,GO:0044425,GO:0044459,GO:0044464,GO:0071944	NA	NA	NA	NA	PF04819
pdam_00000320	0.119343	-0.222514	-0.610333	0.693105	0.392008	0.000651894	NA	NA	Downregulated	SDS	Sdsl: Serine dehydratase-like (Mus musculus)	NA	GO:0001101,GO:0003674,GO:0003824,GO:0003941,GO:0004794,GO:0005488,GO:0005515,GO:0005575,GO:0005622,GO:0005623,GO:0005737,GO:0005739,GO:0005759,GO:0005975,GO:0005996,GO:0006006,GO:0006082,GO:0006090,GO:0006094,GO:0006520,GO:0006563,GO:0006565,GO:0006566,GO:0006567,GO:0006807,GO:0007584,GO:0008150,GO:0008152,GO:0009056,GO:0009058,GO:0009063,GO:0009066,GO:0009068,GO:0009069,GO:0009071,GO:0009295,GO:…	K17989	K17989	E	Amino acid transport and metabolism	PF00291
pdam_00000321	0.0612928	-0.0429002	-0.101285	0.760427	0.845551	0.428112	NA	NA	NA	PHF12	PHF12: PHD finger protein 12 (Homo sapiens)	GO:0005515	GO:0000118,GO:0000122,GO:0000228,GO:0000785,GO:0000790,GO:0000988,GO:0000989,GO:0001071,GO:0001076,GO:0001104,GO:0001106,GO:0001191,GO:0003674,GO:0003700,GO:0003712,GO:0003714,GO:0005488,GO:0005543,GO:0005575,GO:0005622,GO:0005623,GO:0005634,GO:0005654,GO:0005694,GO:0006139,GO:0006275,GO:0006325,GO:0006351,GO:0006354,GO:0006355,GO:0006357,GO:0006366,GO:0006368,GO:0006464,GO:0006476,GO:0006725,GO:…	NA	NA	NA	NA	PF00498, PF00628, PF16737
pdam_00000323	-0.191219	0.244219	0.928848	0.64481	0.530218	0.000137308	NA	NA	Upregulated	UNC119	UNC119B: Protein unc-119 homolog B (Homo sapiens)	NA	GO:0000003,GO:0000902,GO:0001558,GO:0002119,GO:0002164,GO:0003008,GO:0003674,GO:0005488,GO:0005515,GO:0005575,GO:0005622,GO:0005623,GO:0005737,GO:0005813,GO:0005815,GO:0005829,GO:0005856,GO:0005929,GO:0006810,GO:0006996,GO:0007154,GO:0007165,GO:0007267,GO:0007268,GO:0007275,GO:0007399,GO:0007600,GO:0007601,GO:0007602,GO:0007610,GO:0007631,GO:0007635,GO:0008104,GO:0008150,GO:0008152,GO:0008289,GO:…	K23539	NA	NA	NA	PF05351
pdam_00000324	0.237462	0.135424	0.221458	0.149615	0.451376	0.0722154	NA	NA	NA	PRPF19	PRPF19: Pre-mRNA-processing factor 19 (Homo sapiens)	GO:0004842, GO:0005515, GO:0016567	GO:0000003,GO:0000151,GO:0000209,GO:0000245,GO:0000349,GO:0000375,GO:0000377,GO:0000393,GO:0000398,GO:0000974,GO:0001701,GO:0001824,GO:0001832,GO:0001833,GO:0002009,GO:0002119,GO:0002164,GO:0003006,GO:0003674,GO:0003824,GO:0004842,GO:0005575,GO:0005618,GO:0005622,GO:0005623,GO:0005634,GO:0005635,GO:0005654,GO:0005681,GO:0005684,GO:0005730,GO:0005737,GO:0005739,GO:0005811,GO:0005819,GO:0005829,GO:…	K10599	K10599,K17609	A	RNA processing and modification	PF00400, PF08606
pdam_00000325	-0.117215	0.0986732	0.0266339	0.429377	0.511829	0.817306	NA	NA	NA	NA	CCDC92: Coiled-coil domain-containing protein 92 (Homo sapiens)	NA	NA	K16452	K16452	NA	NA	PF14916
pdam_00000326	-0.0264832	-0.0660998	-0.0368889	0.929602	0.812096	0.833408	NA	NA	NA	DTX2	DTX2: Probable E3 ubiquitin-protein ligase DTX2 (Homo sapiens)	GO:0008270, GO:0046872	GO:0003674,GO:0003824,GO:0004842,GO:0005102,GO:0005112,GO:0005488,GO:0005515,GO:0005575,GO:0005622,GO:0005623,GO:0005634,GO:0005635,GO:0005737,GO:0006464,GO:0006810,GO:0006897,GO:0007154,GO:0007165,GO:0007166,GO:0007219,GO:0007220,GO:0007275,GO:0007444,GO:0008150,GO:0008152,GO:0008593,GO:0009966,GO:0009967,GO:0009968,GO:0009987,GO:0010646,GO:0010647,GO:0010648,GO:0012505,GO:0016020,GO:0016055,GO:…	K06058	K06058	O	Posttranslational modification, protein turnover, chaperones	PF00097, PF028259
pdam_00000330	0.198741	-0.0014081	0.307899	0.546851	0.998001	0.159863	NA	NA	NA	DNAH10	DNAH10: Dynein heavy chain 10%2C axonemal (Homo sapiens)	GO:0003777, GO:0005524, GO:0007018, GO:0016887, GO:0030286	GO:0003674,GO:0003774,GO:0003777,GO:0003824,GO:0005575,GO:0005622,GO:0005623,GO:0005737,GO:0005856,GO:0005858,GO:0005875,GO:0005929,GO:0005930,GO:0006139,GO:0006152,GO:0006163,GO:0006195,GO:0006200,GO:0006725,GO:0006753,GO:0006793,GO:0006796,GO:0006807,GO:0006928,GO:0007017,GO:0007018,GO:0008150,GO:0008152,GO:0009056,GO:0009116,GO:0009117,GO:0009119,GO:0009123,GO:0009125,GO:0009126,GO:0009128,GO:…	K10408	K10408,K10413	Z	Cytoskeleton	PF03028, PF07728, PF08385, PF08393, PF12774, PF12775, PF12777, PF12780, PF12781
pdam_00000331	-0.408408	0.335535	0.231488	0.258964	0.33676	0.397837	NA	NA	NA	NA	PXDNL: Peroxidasin-like protein (Homo sapiens)	NA	GO:0005575,GO:0016020	NA	NA	NA	NA	PF00084, PF07679, PF13927
pdam_00000332	-0.0989245	0.105855	0.236394	0.763907	0.750651	0.23483	NA	NA	NA	NOL10	nol10: Nucleolar protein 10 (Xenopus laevis)	GO:0005515, GO:0005634	GO:0000003,GO:0002119,GO:0002164,GO:0005575,GO:0005622,GO:0005623,GO:0005634,GO:0005730,GO:0005737,GO:0005829,GO:0006139,GO:0006364,GO:0006396,GO:0006725,GO:0006807,GO:0007275,GO:0007610,GO:0008150,GO:0008152,GO:0009553,GO:0009561,GO:0009790,GO:0009791,GO:0009792,GO:0009987,GO:0010467,GO:0016070,GO:0016072,GO:0018991,GO:0019098,GO:0022414,GO:0022613,GO:0030529,GO:0030684,GO:0030686,GO:0031974,GO:…	K14788	K14788	NA	NA	PF08159
pdam_00000333	-0.190769	0.527927	0.690293	0.428573	0.00242971	7.09949e-06	NA	Upregulated	Upregulated	NA	unknown function	NA	NA	NA	NA	NA	NA	NA
pdam_00000335	-0.0616683	-0.114212	-0.0761408	0.772935	0.551623	0.582634	NA	NA	NA	RGS22	Rgs22: Regulator of G-protein signaling 22 (Mus musculus)	NA	GO:0003674,GO:0005096,GO:0005575,GO:0005622,GO:0005623,GO:0005737,GO:0005886,GO:0006140,GO:0008047,GO:0008150,GO:0009118,GO:0009894,GO:0016020,GO:0019219,GO:0019220,GO:0019222,GO:0030234,GO:0030695,GO:0030811,GO:0031323,GO:0031329,GO:0033121,GO:0033124,GO:0043085,GO:0043087,GO:0043547,GO:0044093,GO:0044424,GO:0044464,GO:0050789,GO:0050790,GO:0050794,GO:0051171,GO:0051174,GO:0051336,GO:0051345,GO:…	NA	NA	T	Signal transduction mechanisms	PF00615
pdam_00000336	0.109738	-0.0252638	0.137714	0.578194	0.922443	0.297574	NA	NA	NA	MECR	Mecr: Trans-2-enoyl-CoA reductase%2C mitochondrial (Mus musculus)	GO:0016491, GO:0055114	GO:0000166,GO:0001655,GO:0001822,GO:0001882,GO:0001883,GO:0003674,GO:0003824,GO:0004022,GO:0004024,GO:0005102,GO:0005488,GO:0005507,GO:0005515,GO:0005524,GO:0005575,GO:0005622,GO:0005623,GO:0005634,GO:0005737,GO:0005739,GO:0005759,GO:0005829,GO:0005856,GO:0005875,GO:0006082,GO:0006091,GO:0006629,GO:0006631,GO:0006633,GO:0006950,GO:0007275,GO:0007568,GO:0008150,GO:0008152,GO:0008270,GO:0008340,GO:…	K07512	K00344,K07512	Q	Secondary metabolites biosynthesis, transport and catabolism	PF00107, PF08240
pdam_00000337	-0.102464	-0.333823	-0.733104	0.758137	0.186963	9.17457e-05	NA	NA	Downregulated	NA	unknown function	NA	NA	NA	NA	NA	NA	PF05960
pdam_00000338	-0.188971	-0.146093	-0.485247	0.582816	0.682185	0.0268722	NA	NA	Downregulated	NA	unknown function	NA	NA	NA	NA	NA	NA	PF13820
pdam_00000339	0.189883	-0.102076	-0.181729	0.24443	0.579983	0.131857	NA	NA	NA	HERC2	Hectd3: E3 ubiquitin-protein ligase HECTD3 (Mus musculus)	GO:0004719, GO:0004842, GO:0006464	GO:0003674,GO:0003824,GO:0004842,GO:0005085,GO:0005575,GO:0005622,GO:0005623,GO:0005634,GO:0005737,GO:0006464,GO:0006508,GO:0006511,GO:0008150,GO:0008152,GO:0009056,GO:0009057,GO:0009987,GO:0016567,GO:0016874,GO:0016879,GO:0016881,GO:0019222,GO:0019538,GO:0019787,GO:0019941,GO:0030163,GO:0030234,GO:0030695,GO:0032446,GO:0036211,GO:0042787,GO:0043170,GO:0043226,GO:0043227,GO:0043229,GO:0043231,GO:…	NA	K10589,K10592,K10595,K12233	O	Posttranslational modification, protein turnover, chaperones	PF00632, PF01135
pdam_00000340	-0.156759	-0.0993041	-0.302168	0.439224	0.651915	0.0259306	NA	NA	Downregulated	SSH2	SSH2: Protein phosphatase Slingshot homolog 2 (Homo sapiens)	GO:0004725, GO:0006470, GO:0008138, GO:0016311, GO:0016791, GO:0030036	GO:0000188,GO:0000278,GO:0000902,GO:0001654,GO:0001932,GO:0001933,GO:0003674,GO:0003779,GO:0003824,GO:0004721,GO:0005488,GO:0005515,GO:0005575,GO:0005622,GO:0005623,GO:0005634,GO:0005737,GO:0005856,GO:0005886,GO:0005912,GO:0005924,GO:0005925,GO:0006464,GO:0006469,GO:0006470,GO:0006793,GO:0006796,GO:0006996,GO:0007010,GO:0007049,GO:0007275,GO:0007399,GO:0007417,GO:0007420,GO:0007423,GO:0008064,GO:…	K05766	K05766	V	Defense mechanisms	PF00782, PF08766
pdam_00000341	-0.272051	-0.608458	-1.59702	0.546263	0.0953301	1.19846e-08	NA	NA	Downregulated	NA	HMCN2: Hemicentin-2 (Homo sapiens)	NA	GO:0005575,GO:0016020	NA	NA	NA	NA	PF00084, PF01391, PF07679, PF13927
pdam_00000342	0.267783	0.2877	0.605642	0.269782	0.196486	0.00024657	NA	NA	Upregulated	BCS1L	BCS1L: Mitochondrial chaperone BCS1 (Bos taurus)	GO:0005524, GO:0034551	GO:0002119,GO:0002164,GO:0003674,GO:0003824,GO:0005215,GO:0005575,GO:0005622,GO:0005623,GO:0005737,GO:0005739,GO:0005740,GO:0005743,GO:0005746,GO:0005750,GO:0006139,GO:0006152,GO:0006163,GO:0006195,GO:0006200,GO:0006461,GO:0006725,GO:0006753,GO:0006793,GO:0006796,GO:0006807,GO:0006810,GO:0006897,GO:0006898,GO:0006996,GO:0007005,GO:0007006,GO:0007275,GO:0008104,GO:0008150,GO:0008152,GO:0008320,GO:…	K08900	K08900	O	Posttranslational modification, protein turnover, chaperones	PF00004, PF08740
pdam_00000345	0.133491	-1.0845	3.27275	0.950227	0.488997	0.00115236	NA	NA	Upregulated	DBLOX	PXDN: Peroxidasin homolog (Homo sapiens)	GO:0004601, GO:0006979, GO:0020037, GO:0055114	GO:0000003,GO:0003006,GO:0003674,GO:0003824,GO:0004601,GO:0007275,GO:0007548,GO:0008150,GO:0008152,GO:0016209,GO:0016491,GO:0016684,GO:0022414,GO:0032501,GO:0032502,GO:0040035,GO:0044699,GO:0044707,GO:0044710,GO:0044767,GO:0048513,GO:0048608,GO:0048731,GO:0048806,GO:0048856,GO:0055114,GO:0061458	NA	K19511	NA	NA	PF03098
pdam_00000348	-2.10786	0.615041	1.64645	0.0378075	0.641923	0.0429098	Downregulated	NA	Upregulated	NA	pxdn: Peroxidasin (Xenopus tropicalis)	GO:0004601, GO:0006979, GO:0020037, GO:0055114	GO:0000003,GO:0002119,GO:0002164,GO:0003006,GO:0007275,GO:0007548,GO:0008150,GO:0009790,GO:0009791,GO:0009792,GO:0022414,GO:0032501,GO:0032502,GO:0040007,GO:0040035,GO:0044699,GO:0044707,GO:0044767,GO:0048513,GO:0048608,GO:0048731,GO:0048806,GO:0048856,GO:0061458	NA	K00509,K19511	NA	NA	PF03098
pdam_00000349	-1.16968	0.738828	1.37491	0.324218	0.570092	0.103581	NA	NA	NA	DBLOX	PXDN: Peroxidasin homolog (Homo sapiens)	GO:0004601, GO:0006979, GO:0020037, GO:0055114	GO:0000003,GO:0003006,GO:0003674,GO:0003824,GO:0004601,GO:0007275,GO:0007548,GO:0008150,GO:0008152,GO:0016209,GO:0016491,GO:0016684,GO:0022414,GO:0032501,GO:0032502,GO:0040035,GO:0044699,GO:0044707,GO:0044710,GO:0044767,GO:0048513,GO:0048608,GO:0048731,GO:0048806,GO:0048856,GO:0055114,GO:0061458	NA	K19511	I	Lipid transport and metabolism	PF03098
pdam_00000351	0.944768	1.54069	2.47729	0.0753494	0.000402678	1.90412e-10	NA	Upregulated	Upregulated	NA	Pxd: Peroxidase (Drosophila melanogaster)	GO:0004601, GO:0006979, GO:0020037, GO:0055114	GO:0000003,GO:0002119,GO:0002164,GO:0003006,GO:0007275,GO:0007548,GO:0008150,GO:0009790,GO:0009791,GO:0009792,GO:0022414,GO:0032501,GO:0032502,GO:0040007,GO:0040035,GO:0044699,GO:0044707,GO:0044767,GO:0048513,GO:0048608,GO:0048731,GO:0048806,GO:0048856,GO:0061458	NA	K00509,K19511	NA	NA	PF03098
pdam_00000352	-0.701851	-0.458113	-0.204119	0.152811	0.374855	0.613743	NA	NA	NA	NA	ldlrap1-b: Low density lipoprotein receptor adapter protein 1-B (Xenopus laevis)	GO:0005515	NA	NA	NA	NA	NA	PF00640
pdam_00000353	0.516445	1.07546	1.46444	0.223842	NA	1.91863e-07	NA	NA	Upregulated	TMEM68	TMEM68: Transmembrane protein 68 (Bos taurus)	GO:0008152, GO:0016746	GO:0005575,GO:0016020	NA	NA	I	Lipid transport and metabolism	PF01553
pdam_00000355	-0.0530384	-0.0310124	-0.183474	0.921864	0.962554	0.554327	NA	NA	NA	NA	GAREM1: GRB2-associated and regulator of MAPK protein 1 (Homo sapiens)	GO:0005515	NA	NA	NA	NA	NA	PF00536, PF12736
pdam_00000356	0.314441	0.308951	0.21681	0.514696	0.524495	0.534605	NA	NA	NA	NA	unknown function	NA	NA	NA	NA	NA	NA	NA
pdam_00000357	-0.0128101	0.280886	0.432652	0.974522	0.310901	0.029323	NA	NA	Upregulated	NA	COX6C: Cytochrome c oxidase subunit 6C (Plecturocebus donacophilus)	GO:0004129	NA	NA	NA	NA	NA	PF02937
pdam_00000358	0.0322568	0.0634478	0.0451761	0.873906	0.729782	0.712822	NA	NA	NA	ASXL1	ASXL3: Putative Polycomb group protein ASXL3 (Homo sapiens)	GO:0003677, GO:0006351, GO:0006355	GO:0000122,GO:0000228,GO:0000785,GO:0000790,GO:0000988,GO:0000989,GO:0001501,GO:0003674,GO:0003712,GO:0003713,GO:0003714,GO:0005102,GO:0005488,GO:0005515,GO:0005575,GO:0005622,GO:0005623,GO:0005634,GO:0005694,GO:0006325,GO:0006355,GO:0006357,GO:0006464,GO:0006996,GO:0007275,GO:0008134,GO:0008150,GO:0008152,GO:0009889,GO:0009890,GO:0009891,GO:0009892,GO:0009893,GO:0009966,GO:0009967,GO:0009968,GO:…	K11471	K10394,K11471	K	Transcription	PF05066, PF13919, PF13922
pdam_00000359	-0.114865	-0.216169	-0.642347	0.764121	NA	0.00511799	NA	NA	Downregulated	NA	FPV244: Putative ankyrin repeat protein FPV244 (Fowlpox virus (strain NVSL))	GO:0005515	NA	NA	K15502,K15503,K18441	M	Cell wall/membrane/envelope biogenesis	PF00023, PF12796
pdam_00000360	0.182402	0.139177	0.602164	0.332883	0.470878	9.70494e-07	NA	NA	Upregulated	EEF1E1	EEF1E1: Eukaryotic translation elongation factor 1 epsilon-1 (Homo sapiens)	NA	GO:0000988,GO:0000989,GO:0002181,GO:0002182,GO:0003674,GO:0003676,GO:0003712,GO:0003713,GO:0003723,GO:0003746,GO:0003824,GO:0004364,GO:0005488,GO:0005509,GO:0005543,GO:0005575,GO:0005576,GO:0005622,GO:0005623,GO:0005634,GO:0005737,GO:0005739,GO:0005829,GO:0005840,GO:0005853,GO:0005856,GO:0005875,GO:0006082,GO:0006139,GO:0006259,GO:0006281,GO:0006355,GO:0006357,GO:0006399,GO:0006412,GO:0006414,GO:…	K15439	K03233,K15439	J	Translation, ribosomal structure and biogenesis	PF14497
pdam_00000361	0.0208632	0.301889	0.358758	0.956072	0.220479	0.0542281	NA	NA	NA	TSPAN9	CD53: Leukocyte surface antigen CD53 (Homo sapiens)	GO:0016021	GO:0005575,GO:0005623,GO:0005886,GO:0005887,GO:0016020,GO:0016021,GO:0031224,GO:0031226,GO:0044425,GO:0044459,GO:0044464,GO:0071944	NA	K17294,K17350	NA	NA	PF00335
pdam_00000362	0.104643	0.0407424	-0.0619752	0.633015	0.878701	0.685351	NA	NA	NA	KAT8	Kat8: Histone acetyltransferase KAT8 (Rattus norvegicus)	GO:0006355, GO:0016747	GO:0000123,GO:0000775,GO:0000776,GO:0000803,GO:0000805,GO:0001708,GO:0002376,GO:0002520,GO:0003674,GO:0003676,GO:0003682,GO:0003723,GO:0003729,GO:0003824,GO:0004402,GO:0004468,GO:0005488,GO:0005515,GO:0005575,GO:0005622,GO:0005623,GO:0005634,GO:0005654,GO:0005667,GO:0005694,GO:0005700,GO:0005705,GO:0006325,GO:0006355,GO:0006464,GO:0006473,GO:0006475,GO:0006996,GO:0007275,GO:0007549,GO:0008080,GO:…	K11308	K11308	B	Chromatin structure and dynamics	PF01853, PF11717
pdam_00000363	-0.158488	-0.263211	-0.410285	0.784377	NA	0.248979	NA	NA	NA	SLC16A2	slc16a10: Monocarboxylate transporter 10 (Danio rerio)	GO:0016021, GO:0055085	GO:0003333,GO:0003674,GO:0005215,GO:0005342,GO:0005488,GO:0005575,GO:0005623,GO:0005886,GO:0006810,GO:0006811,GO:0006820,GO:0006865,GO:0007275,GO:0007399,GO:0007417,GO:0008150,GO:0008509,GO:0008514,GO:0009790,GO:0009914,GO:0009987,GO:0010817,GO:0015075,GO:0015171,GO:0015291,GO:0015349,GO:0015711,GO:0015801,GO:0015849,GO:0016020,GO:0016323,GO:0022804,GO:0022857,GO:0022891,GO:0022892,GO:0032501,GO:…	NA	K08187,K08231	G	Carbohydrate transport and metabolism	PF07690
pdam_00000365	-0.269195	-0.18982	-0.52502	0.338217	0.527789	0.00690325	NA	NA	Downregulated	NA	unknown function	GO:0005515, GO:0007165	NA	NA	NA	NA	NA	PF07647, PF13676
pdam_00000366	0.115567	0.164768	0.187881	0.518748	0.305928	0.116105	NA	NA	NA	TCEA1	TCEA2: Transcription elongation factor A protein 2 (Homo sapiens)	GO:0003676, GO:0005634, GO:0006351, GO:0006355, GO:0008270	GO:0000975,GO:0000988,GO:0000990,GO:0000991,GO:0000993,GO:0001012,GO:0001067,GO:0001098,GO:0001099,GO:0001139,GO:0001192,GO:0001193,GO:0002262,GO:0002376,GO:0002520,GO:0003674,GO:0003676,GO:0003677,GO:0005488,GO:0005515,GO:0005575,GO:0005622,GO:0005623,GO:0005634,GO:0005654,GO:0005730,GO:0005813,GO:0005815,GO:0005856,GO:0006139,GO:0006259,GO:0006281,GO:0006283,GO:0006289,GO:0006351,GO:0006352,GO:…	K03145	K03145	K	Transcription	PF01096, PF07500, PF08711
pdam_00000367	-0.193638	0.0174752	-0.195987	0.46025	0.965318	0.292121	NA	NA	NA	NA	RGS17: Regulator of G-protein signaling 17 (Homo sapiens)	NA	NA	K16449	K16449	T	Signal transduction mechanisms	PF00615
pdam_00000369	-0.201453	0.425675	1.20403	0.709614	0.331262	6.52248e-05	NA	NA	Upregulated	BAI3	ADGRL3: Adhesion G protein-coupled receptor L3 (Homo sapiens)	GO:0004888, GO:0004930, GO:0005515, GO:0007166, GO:0007186, GO:0016021	GO:0000902,GO:0000904,GO:0003674,GO:0004871,GO:0004872,GO:0004888,GO:0004930,GO:0005575,GO:0005623,GO:0005886,GO:0005887,GO:0005911,GO:0007154,GO:0007155,GO:0007165,GO:0007166,GO:0007186,GO:0007275,GO:0007399,GO:0007409,GO:0007422,GO:0008150,GO:0008285,GO:0009653,GO:0009987,GO:0016020,GO:0016021,GO:0016043,GO:0016525,GO:0022008,GO:0022603,GO:0022610,GO:0023052,GO:0030030,GO:0030054,GO:0030154,GO:…	NA	K04596,K04597,K04598	W	Extracellular structures	PF00002, PF01825, PF07679, PF16489
pdam_00000370	-0.429219	0.267413	2.00983	0.590227	0.763206	2.98816e-05	NA	NA	Upregulated	NA	GHSR: Growth hormone secretagogue receptor type 1 (Homo sapiens)	GO:0004930, GO:0007186, GO:0016021	NA	NA	NA	U	Intracellular trafficking, secretion, and vesicular transport	PF00001
pdam_00000371	0.0301837	-0.0355031	-0.246081	0.9003	0.885946	0.0530532	NA	NA	NA	CHEK2	Chek2: Serine/threonine-protein kinase Chk2 (Mus musculus)	GO:0004672, GO:0005515, GO:0005524, GO:0006468	GO:0000003,GO:0000075,GO:0000077,GO:0000086,GO:0000226,GO:0000278,GO:0000280,GO:0000724,GO:0000725,GO:0003006,GO:0003674,GO:0003824,GO:0004672,GO:0004674,GO:0005488,GO:0005515,GO:0005575,GO:0005622,GO:0005623,GO:0005634,GO:0005654,GO:0005737,GO:0006139,GO:0006259,GO:0006260,GO:0006261,GO:0006275,GO:0006281,GO:0006282,GO:0006302,GO:0006310,GO:0006355,GO:0006461,GO:0006464,GO:0006468,GO:0006725,GO:…	K06641	K00924,K06641	D	Cell cycle control, cell division, chromosome partitioning	PF00069, PF00498
pdam_00000372	0.117408	0.494942	0.8013	0.668644	0.00768196	3.81333e-07	NA	Upregulated	Upregulated	RAB24	rab24: Ras-related protein Rab-24 (Dictyostelium discoideum)	GO:0003924, GO:0005525	GO:0005575,GO:0005622,GO:0005623,GO:0005737,GO:0005768,GO:0005783,GO:0005793,GO:0005794,GO:0016020,GO:0043226,GO:0043227,GO:0043229,GO:0043231,GO:0044424,GO:0044444,GO:0044464	NA	K07912	NA	NA	PF00071
pdam_00000373	0.358111	0.0354959	1.32416	0.648381	0.974757	0.00464281	NA	NA	Upregulated	NA	ZIFL2: Probable peptide/nitrate transporter At3g43790 (Arabidopsis thaliana)	GO:0016021, GO:0055085	NA	NA	NA	NA	NA	PF07690
pdam_00000375	-0.206447	-0.0577933	0.298955	0.582408	0.904287	0.224155	NA	NA	NA	GOLGA3	GOLGA3: Golgin subfamily A member 3 (Homo sapiens)	NA	GO:0000139,GO:0003674,GO:0005215,GO:0005575,GO:0005622,GO:0005623,GO:0005634,GO:0005737,GO:0005793,GO:0005794,GO:0005795,GO:0006810,GO:0006891,GO:0008150,GO:0009987,GO:0012505,GO:0016020,GO:0016192,GO:0017119,GO:0031090,GO:0031984,GO:0031985,GO:0032580,GO:0032991,GO:0043226,GO:0043227,GO:0043229,GO:0043231,GO:0043234,GO:0044422,GO:0044424,GO:0044431,GO:0044444,GO:0044446,GO:0044464,GO:0044699,GO:…	NA	NA	NA	NA	NA
pdam_00000377	-0.139552	-0.376273	-0.329099	0.664755	0.130255	0.097459	NA	NA	NA	GUSB	GUSB: Beta-glucuronidase (Canis lupus familiaris)	GO:0004553, GO:0005975	GO:0000003,GO:0000323,GO:0000902,GO:0000904,GO:0003674,GO:0003824,GO:0004553,GO:0004566,GO:0005488,GO:0005575,GO:0005576,GO:0005615,GO:0005622,GO:0005623,GO:0005737,GO:0005764,GO:0005773,GO:0005775,GO:0005783,GO:0005975,GO:0006022,GO:0006026,GO:0006027,GO:0006807,GO:0006928,GO:0006935,GO:0007275,GO:0007399,GO:0007409,GO:0007411,GO:0007413,GO:0008037,GO:0008038,GO:0008150,GO:0008152,GO:0009056,GO:…	K01195	K01195	G	Carbohydrate transport and metabolism	PF00703, PF02836, PF02837
pdam_00000378	0.126491	-0.106737	0.0410099	0.749961	0.800833	0.88034	NA	NA	NA	MED13L	MED13L: Mediator of RNA polymerase II transcription subunit 13-like (Homo sapiens)	GO:0001104, GO:0006357, GO:0016592	GO:0000003,GO:0000988,GO:0000989,GO:0001076,GO:0001104,GO:0001654,GO:0002009,GO:0002165,GO:0003002,GO:0003006,GO:0003674,GO:0003712,GO:0003713,GO:0004872,GO:0005102,GO:0005488,GO:0005515,GO:0005575,GO:0005622,GO:0005623,GO:0005634,GO:0005654,GO:0006139,GO:0006351,GO:0006352,GO:0006355,GO:0006357,GO:0006366,GO:0006367,GO:0006725,GO:0006807,GO:0006928,GO:0006935,GO:0006950,GO:0007154,GO:0007165,GO:…	K15164	K15164	K	Transcription	PF06333, PF11597
pdam_00000379	0.0988154	-0.128654	-0.275915	0.622407	0.488997	0.0326071	NA	NA	Downregulated	FMO4	FMO2: Dimethylaniline monooxygenase [N-oxide-forming] 2 (Gorilla gorilla gorilla)	GO:0004499, GO:0016491, GO:0050660, GO:0050661, GO:0055114	GO:0000003,GO:0000166,GO:0002237,GO:0003674,GO:0003824,GO:0004462,GO:0004497,GO:0004499,GO:0005488,GO:0005575,GO:0005622,GO:0005623,GO:0005737,GO:0005783,GO:0005788,GO:0005789,GO:0006082,GO:0006139,GO:0006725,GO:0006732,GO:0006733,GO:0006739,GO:0006753,GO:0006793,GO:0006796,GO:0006805,GO:0006807,GO:0006950,GO:0006970,GO:0007275,GO:0008150,GO:0008152,GO:0009117,GO:0009404,GO:0009410,GO:0009607,GO:…	NA	K00485	Q	Secondary metabolites biosynthesis, transport and catabolism	PF00743
pdam_00000380	0.0248311	-0.223255	-0.428467	0.922743	0.194675	0.00100958	NA	NA	Downregulated	NA	unknown function	NA	NA	NA	NA	NA	NA	NA
pdam_00000381	-0.11478	0.0238263	-0.0210116	0.659224	0.943103	0.91174	NA	NA	NA	NOS1	NOS1: Nitric oxide synthase%2C brain (Oryctolagus cuniculus)	GO:0004517, GO:0005506, GO:0005515, GO:0005516, GO:0006809, GO:0010181, GO:0016491, GO:0020037, GO:0050660, GO:0050661, GO:0055114	GO:0000003,GO:0000139,GO:0000166,GO:0000302,GO:0000323,GO:0000768,GO:0000902,GO:0000904,GO:0001101,GO:0001505,GO:0001525,GO:0001542,GO:0001568,GO:0001666,GO:0001667,GO:0001701,GO:0001910,GO:0001912,GO:0001917,GO:0001944,GO:0001974,GO:0001990,GO:0002026,GO:0002028,GO:0002227,GO:0002237,GO:0002251,GO:0002376,GO:0002385,GO:0002520,GO:0002791,GO:0002792,GO:0003006,GO:0003008,GO:0003012,GO:0003013,GO:…	K13240	K13240,K13241,K13242	C	Energy production and conversion	PF00175, PF00258, PF00595, PF00667, PF02898
pdam_00000383	0.422088	0.513466	0.536267	0.165868	0.0609456	0.015437	NA	NA	Upregulated	DRG1	drg1: Developmentally-regulated GTP-binding protein 1 (Xenopus laevis)	GO:0005525	GO:0000003,GO:0000166,GO:0001882,GO:0001883,GO:0002119,GO:0002164,GO:0002181,GO:0003006,GO:0003674,GO:0003824,GO:0003924,GO:0005488,GO:0005515,GO:0005525,GO:0005575,GO:0005622,GO:0005623,GO:0005634,GO:0005737,GO:0005829,GO:0005844,GO:0005856,GO:0006139,GO:0006152,GO:0006163,GO:0006184,GO:0006195,GO:0006351,GO:0006412,GO:0006725,GO:0006753,GO:0006793,GO:0006796,GO:0006807,GO:0007154,GO:0007165,GO:…	NA	K06944	T	Signal transduction mechanisms	PF01926, PF02824, PF16897
pdam_00000384	0.0848857	-0.0682713	0.200822	0.789464	0.844138	0.297786	NA	NA	NA	EFCAB5	EFCAB5: EF-hand calcium-binding domain-containing protein 5 (Homo sapiens)	GO:0005509	NA	NA	NA	NA	NA	NA
pdam_00000385	0.116213	0.17105	0.174848	0.704808	0.543394	0.369619	NA	NA	NA	NA	unknown function	NA	NA	NA	NA	NA	NA	NA
pdam_00000387	0.0237897	-0.290642	-0.468582	0.935373	0.120179	0.00116484	NA	NA	Downregulated	BRIP1	BRIP1: Fanconi anemia group J protein (Homo sapiens)	GO:0003676, GO:0003677, GO:0004003, GO:0005524, GO:0006139, GO:0008026, GO:0016818	GO:0000003,GO:0000018,GO:0000075,GO:0000077,GO:0000166,GO:0000723,GO:0001882,GO:0001883,GO:0003674,GO:0003676,GO:0003677,GO:0003678,GO:0003824,GO:0004003,GO:0004386,GO:0005488,GO:0005524,GO:0005575,GO:0005622,GO:0005623,GO:0005634,GO:0005635,GO:0005654,GO:0005737,GO:0005739,GO:0006139,GO:0006152,GO:0006163,GO:0006195,GO:0006200,GO:0006259,GO:0006275,GO:0006281,GO:0006282,GO:0006289,GO:0006302,GO:…	K15362	K11136,K11273,K15362	L	Replication, recombination and repair	PF06733, PF13307
pdam_00000393	0.262181	0.0855102	0.0844256	0.491255	0.860589	0.77243	NA	NA	NA	PITPNM1	rdgB: Protein retinal degeneration B (Drosophila melanogaster)	GO:0005622, GO:0006810, GO:0046872	GO:0000003,GO:0000139,GO:0001894,GO:0001895,GO:0003008,GO:0003674,GO:0003824,GO:0005215,GO:0005319,GO:0005388,GO:0005488,GO:0005509,GO:0005543,GO:0005548,GO:0005575,GO:0005622,GO:0005623,GO:0005737,GO:0005783,GO:0005789,GO:0005790,GO:0005794,GO:0005795,GO:0005811,GO:0005886,GO:0005887,GO:0005929,GO:0006139,GO:0006152,GO:0006163,GO:0006195,GO:0006200,GO:0006629,GO:0006644,GO:0006650,GO:0006725,GO:…	K24069	NA	NA	NA	PF02121, PF02862
pdam_00000394	0.0361392	0.0274249	0.715664	0.882671	0.916537	2.87838e-09	NA	NA	Upregulated	P2RX1	P2RX4: P2X purinoceptor 4 (Homo sapiens)	GO:0001614, GO:0004931, GO:0005887, GO:0033198, GO:0098655	GO:0000003,GO:0000166,GO:0001508,GO:0001614,GO:0001666,GO:0001775,GO:0001820,GO:0001882,GO:0001883,GO:0001894,GO:0002028,GO:0002351,GO:0002442,GO:0002532,GO:0002554,GO:0002576,GO:0003008,GO:0003012,GO:0003013,GO:0003018,GO:0003056,GO:0003674,GO:0004871,GO:0004872,GO:0004888,GO:0004931,GO:0005102,GO:0005215,GO:0005216,GO:0005230,GO:0005231,GO:0005261,GO:0005262,GO:0005488,GO:0005507,GO:0005515,GO:…	K05218	K05215,K05217,K05218,K05219,K05221	P	Inorganic ion transport and metabolism	PF00864
pdam_00000395	0.0713618	0.0179975	0.0832338	0.683262	0.934032	0.468785	NA	NA	NA	HEATR6	heatr6: HEAT repeat-containing protein 6 (Xenopus laevis)	GO:0005488	GO:0005575,GO:0005622,GO:0005623,GO:0005634,GO:0005737,GO:0005773,GO:0005774,GO:0016020,GO:0031090,GO:0043226,GO:0043227,GO:0043229,GO:0043231,GO:0044422,GO:0044424,GO:0044437,GO:0044444,GO:0044446,GO:0044464	NA	NA	NA	NA	NA
pdam_00000397	0.0991395	0.01016	0.118646	0.692969	0.976803	0.46812	NA	NA	NA	NA	B4galnt4: N-acetyl-beta-glucosaminyl-glycoprotein 4-beta-N-acetylgalactosaminyltransferase 1 (Mus musculus)	GO:0008376, GO:0032580	NA	NA	NA	G	Carbohydrate transport and metabolism	PF05679, PF07691
pdam_00000398	0.0803652	-0.214656	-0.120218	0.816095	0.456417	0.579848	NA	NA	NA	NA	B4GALNT4: N-acetyl-beta-glucosaminyl-glycoprotein 4-beta-N-acetylgalactosaminyltransferase 1 (Homo sapiens)	GO:0008376, GO:0032580	NA	NA	NA	G	Carbohydrate transport and metabolism	PF05679, PF07691
pdam_00000399	0.0658952	0.151781	0.258308	0.868293	0.66243	0.245512	NA	NA	NA	MYO1C	MYO1C: Unconventional myosin-Ic (Gallus gallus)	GO:0003774, GO:0005515, GO:0005524, GO:0016459	GO:0000003,GO:0000166,GO:0001882,GO:0001883,GO:0002165,GO:0003006,GO:0003674,GO:0003774,GO:0003779,GO:0003824,GO:0005488,GO:0005515,GO:0005516,GO:0005524,GO:0005543,GO:0005575,GO:0005576,GO:0005622,GO:0005623,GO:0005634,GO:0005635,GO:0005643,GO:0005654,GO:0005730,GO:0005737,GO:0005856,GO:0005884,GO:0005886,GO:0005902,GO:0005903,GO:0005938,GO:0006139,GO:0006152,GO:0006163,GO:0006195,GO:0006200,GO:…	K10356	K10356	Z	Cytoskeleton	PF00063, PF06017
pdam_00000401	0.0470785	0.245546	-0.459956	0.912848	0.450787	0.0521457	NA	NA	NA	NA	unknown function	GO:0005509	NA	NA	NA	NA	NA	NA
pdam_00000403	0.185456	-0.0123583	0.300149	0.311847	0.967978	0.0183019	NA	NA	Upregulated	HSD17B4	HSD17B4: Peroxisomal multifunctional enzyme type 2 (Homo sapiens)	GO:0016491	GO:0000003,GO:0000038,GO:0001676,GO:0002064,GO:0003006,GO:0003674,GO:0003824,GO:0003857,GO:0004300,GO:0005488,GO:0005515,GO:0005575,GO:0005622,GO:0005623,GO:0005737,GO:0005739,GO:0005777,GO:0005778,GO:0005782,GO:0006066,GO:0006082,GO:0006629,GO:0006631,GO:0006635,GO:0006637,GO:0006694,GO:0006699,GO:0006732,GO:0006793,GO:0006950,GO:0006952,GO:0007275,GO:0007548,GO:0007568,GO:0008150,GO:0008152,GO:…	K12405	K12405,K14729,K19658	I	Lipid transport and metabolism	PF00106, PF01575, PF02036, PF13452
pdam_00000404	0.234269	-0.0826611	-0.0293459	0.220456	0.726458	0.856065	NA	NA	NA	ACOX3	ACOX3: Peroxisomal acyl-coenzyme A oxidase 3 (Homo sapiens)	GO:0003997, GO:0005777, GO:0006631, GO:0006635, GO:0008152, GO:0016627, GO:0050660, GO:0055114, GO:0071949	GO:0000166,GO:0003674,GO:0003824,GO:0003997,GO:0005488,GO:0005504,GO:0005575,GO:0005622,GO:0005623,GO:0005737,GO:0005739,GO:0005777,GO:0005782,GO:0006082,GO:0006629,GO:0006631,GO:0006635,GO:0006810,GO:0006897,GO:0006909,GO:0008150,GO:0008152,GO:0008289,GO:0009056,GO:0009062,GO:0009987,GO:0016042,GO:0016054,GO:0016192,GO:0016402,GO:0016491,GO:0016627,GO:0016634,GO:0019395,GO:0019752,GO:0030258,GO:…	K00232	K00232	I	Lipid transport and metabolism	PF00441, PF01756, PF02770, PF14749
pdam_00000405	-0.0484833	-0.350284	-0.587638	0.91608	0.29039	0.014414	NA	NA	Downregulated	TRAF4	TRAF4: TNF receptor-associated factor 4 (Homo sapiens)	GO:0005515, GO:0007165, GO:0007250, GO:0008270, GO:0042981, GO:0046330	GO:0000902,GO:0000904,GO:0001654,GO:0001700,GO:0001703,GO:0001709,GO:0001932,GO:0001934,GO:0002009,GO:0002064,GO:0002164,GO:0002165,GO:0002168,GO:0003381,GO:0003382,GO:0003383,GO:0003384,GO:0003674,GO:0003676,GO:0003677,GO:0005488,GO:0005515,GO:0005575,GO:0005622,GO:0005623,GO:0005634,GO:0005737,GO:0005856,GO:0005886,GO:0005911,GO:0005923,GO:0005938,GO:0006810,GO:0006897,GO:0006909,GO:0006928,GO:…	K09848	K09848	T	Signal transduction mechanisms	PF02176
pdam_00000406	-0.191523	0.00885619	-0.0815221	0.2633	0.974998	0.545585	NA	NA	NA	NA	Traf4: TNF receptor-associated factor 4 (Mus musculus)	GO:0005515, GO:0007165, GO:0007250, GO:0008270, GO:0042981, GO:0046330	NA	K09848	K09848	T	Signal transduction mechanisms	PF02176, PF13923
pdam_00000408	-0.03928	0.158686	0.543079	0.899966	0.523173	0.000537302	NA	NA	Upregulated	NA	unknown function	NA	NA	NA	NA	NA	NA	PF09727
pdam_00000409	-0.192064	-0.0806961	-0.417253	0.141024	0.599132	8.42276e-06	NA	NA	Downregulated	BCKDK	BCKDK: [3-methyl-2-oxobutanoate dehydrogenase [lipoamide]] kinase%2C mitochondrial (Bos taurus)	NA	GO:0000166,GO:0001882,GO:0001883,GO:0003674,GO:0003824,GO:0004672,GO:0004674,GO:0004740,GO:0005488,GO:0005524,GO:0005575,GO:0005622,GO:0005623,GO:0005737,GO:0005739,GO:0005759,GO:0005947,GO:0006082,GO:0006464,GO:0006468,GO:0006520,GO:0006793,GO:0006796,GO:0006807,GO:0008150,GO:0008152,GO:0009056,GO:0009063,GO:0009081,GO:0009083,GO:0009987,GO:0015976,GO:0016054,GO:0016301,GO:0016310,GO:0016740,GO:…	K00905	K00905	T	Signal transduction mechanisms	PF02518, PF10436
pdam_00000410	0.0449973	0.0828259	0.401273	0.776602	0.557215	4.67531e-06	NA	NA	Upregulated	TNFAIP1	KCTD10: BTB/POZ domain-containing adapter for CUL3-mediated RhoA degradation protein 3 (Homo sapiens)	GO:0005515, GO:0051260	GO:0000003,GO:0000151,GO:0000902,GO:0000904,GO:0002376,GO:0003674,GO:0005488,GO:0005515,GO:0005575,GO:0005622,GO:0005623,GO:0005634,GO:0005737,GO:0005768,GO:0005929,GO:0006139,GO:0006259,GO:0006260,GO:0006275,GO:0006281,GO:0006355,GO:0006461,GO:0006464,GO:0006508,GO:0006511,GO:0006725,GO:0006807,GO:0006915,GO:0006928,GO:0006950,GO:0006955,GO:0006974,GO:0006996,GO:0007010,GO:0007015,GO:0007275,GO:…	K15074	K15074	P	Inorganic ion transport and metabolism	PF02214
pdam_00000411	-0.285426	0.0025497	0.162282	0.133923	0.99538	0.264218	NA	NA	NA	IFT20	ift20: Intraflagellar transport protein 20 homolog (Danio rerio)	NA	GO:0000902,GO:0005575,GO:0005622,GO:0005623,GO:0005737,GO:0005794,GO:0005801,GO:0005813,GO:0005814,GO:0005815,GO:0005856,GO:0005929,GO:0005930,GO:0005932,GO:0006810,GO:0006928,GO:0006996,GO:0007017,GO:0007018,GO:0008150,GO:0009653,GO:0009987,GO:0010927,GO:0010970,GO:0015630,GO:0016043,GO:0022607,GO:0030030,GO:0030031,GO:0030425,GO:0030705,GO:0030990,GO:0030992,GO:0032502,GO:0032989,GO:0032990,GO:…	K16473	K16473	U	Intracellular trafficking, secretion, and vesicular transport	PF14931
pdam_00000413	0.0110907	-0.360784	-0.738963	0.972542	0.071663	3.32293e-06	NA	NA	Downregulated	PIPOX	PIPOX: Peroxisomal sarcosine oxidase (Homo sapiens)	GO:0016491, GO:0055114	GO:0003674,GO:0003824,GO:0005575,GO:0005622,GO:0005623,GO:0005737,GO:0005777,GO:0006082,GO:0006084,GO:0006520,GO:0006553,GO:0006554,GO:0006637,GO:0006732,GO:0006793,GO:0006807,GO:0008115,GO:0008150,GO:0008152,GO:0009056,GO:0009063,GO:0009066,GO:0009068,GO:0009987,GO:0016054,GO:0016491,GO:0016645,GO:0016647,GO:0019474,GO:0019477,GO:0019752,GO:0033514,GO:0035383,GO:0042579,GO:0043226,GO:0043227,GO:…	K02846	K00301,K00306,K12896	E	Amino acid transport and metabolism	PF01266
pdam_00000437	0.287044	0.0636633	0.854196	0.525756	0.916537	0.0029155	NA	NA	Upregulated	FG01388.1	ABCG9: ABC transporter G family member 9 (Arabidopsis thaliana)	GO:0005524, GO:0016020, GO:0016887	GO:0000322,GO:0000323,GO:0000324,GO:0000329,GO:0003674,GO:0003824,GO:0005215,GO:0005575,GO:0005622,GO:0005623,GO:0005737,GO:0005773,GO:0005774,GO:0005783,GO:0006139,GO:0006152,GO:0006163,GO:0006195,GO:0006200,GO:0006725,GO:0006753,GO:0006793,GO:0006796,GO:0006807,GO:0006810,GO:0008150,GO:0008152,GO:0009056,GO:0009116,GO:0009117,GO:0009119,GO:0009123,GO:0009125,GO:0009126,GO:0009128,GO:0009141,GO:…	NA	K05681	Q	Secondary metabolites biosynthesis, transport and catabolism	PF00005, PF01061
pdam_00000444	-0.129047	0.0767179	0.345763	0.663075	0.819433	0.0548132	NA	NA	NA	NA	unknown function	NA	NA	NA	NA	NA	NA	NA
pdam_00000445	-0.194995	0.151762	0.418654	0.55032	0.653202	0.0445297	NA	NA	Upregulated	CIDEA	Dffa: DNA fragmentation factor subunit alpha (Mus musculus)	GO:0005622, GO:0006915	GO:0000003,GO:0000737,GO:0001659,GO:0001817,GO:0001818,GO:0003674,GO:0005488,GO:0005515,GO:0005575,GO:0005622,GO:0005623,GO:0005634,GO:0005737,GO:0005739,GO:0005740,GO:0005811,GO:0006139,GO:0006259,GO:0006308,GO:0006309,GO:0006629,GO:0006725,GO:0006807,GO:0006915,GO:0006921,GO:0006950,GO:0006974,GO:0007154,GO:0007165,GO:0007276,GO:0007292,GO:0008150,GO:0008152,GO:0008219,GO:0008630,GO:0009056,GO:…	NA	K02310	NA	NA	PF02017, PF09033
pdam_00000446	-0.0126643	0.390441	0.647031	0.976538	0.144577	0.00151104	NA	NA	Upregulated	WNT4	WNT4: Protein Wnt-4 (Homo sapiens)	GO:0005102, GO:0005576, GO:0007275, GO:0016055	GO:0000003,GO:0000122,GO:0000132,GO:0000226,GO:0000278,GO:0000902,GO:0000904,GO:0000988,GO:0000989,GO:0001655,GO:0001656,GO:0001657,GO:0001658,GO:0001664,GO:0001667,GO:0001704,GO:0001706,GO:0001708,GO:0001709,GO:0001711,GO:0001714,GO:0001763,GO:0001775,GO:0001822,GO:0001823,GO:0001837,GO:0001838,GO:0001889,GO:0001952,GO:0001954,GO:0002009,GO:0002064,GO:0002065,GO:0002067,GO:0002119,GO:0002164,GO:…	K00408	K00408,K00444,K01558,K03209	T	Signal transduction mechanisms	PF00110
pdam_00000447	0.0778689	0.503992	1.21351	0.889877	0.181453	1.21478e-05	NA	NA	Upregulated	MASP1	Masp1: Mannan-binding lectin serine protease 1 (Rattus norvegicus)	GO:0004252, GO:0005509, GO:0006508	GO:0001867,GO:0002250,GO:0002252,GO:0002253,GO:0002376,GO:0002443,GO:0002449,GO:0002455,GO:0002460,GO:0002673,GO:0002682,GO:0002683,GO:0002684,GO:0002697,GO:0002698,GO:0002920,GO:0002921,GO:0003674,GO:0003824,GO:0004175,GO:0004252,GO:0005488,GO:0005509,GO:0005515,GO:0005575,GO:0005576,GO:0005615,GO:0006508,GO:0006950,GO:0006952,GO:0006955,GO:0006956,GO:0006958,GO:0006959,GO:0007275,GO:0007399,GO:…	K03992	K01330,K01331,K03992,K03993	O	Posttranslational modification, protein turnover, chaperones	PF00084, PF00089, PF00431, PF14670
pdam_00000448	-0.00239159	0.0128082	-0.114556	0.9961	0.98165	0.67067	NA	NA	NA	DBLOX	PXDN: Peroxidasin homolog (Homo sapiens)	GO:0004601, GO:0005509, GO:0006979, GO:0016020, GO:0020037, GO:0055114	GO:0000003,GO:0003006,GO:0003674,GO:0003824,GO:0004601,GO:0007275,GO:0007548,GO:0008150,GO:0008152,GO:0016209,GO:0016491,GO:0016684,GO:0022414,GO:0032501,GO:0032502,GO:0040035,GO:0044699,GO:0044707,GO:0044710,GO:0044767,GO:0048513,GO:0048608,GO:0048731,GO:0048806,GO:0048856,GO:0055114,GO:0061458	NA	K19511	NA	NA	PF00431, PF00688, PF03098, PF07645, PF13330
pdam_00000451	-0.037522	0.030877	0.326723	0.830046	0.866337	0.000409915	NA	NA	Upregulated	DFFB	Dffb: DNA fragmentation factor subunit beta (Mus musculus)	GO:0005622, GO:0005634, GO:0005737, GO:0006309, GO:0006915, GO:0016787	GO:0000228,GO:0000737,GO:0000785,GO:0000790,GO:0003674,GO:0003676,GO:0003677,GO:0003824,GO:0004516,GO:0004518,GO:0004536,GO:0005488,GO:0005575,GO:0005622,GO:0005623,GO:0005634,GO:0005654,GO:0005694,GO:0005737,GO:0005829,GO:0006139,GO:0006259,GO:0006308,GO:0006309,GO:0006323,GO:0006725,GO:0006807,GO:0006915,GO:0006917,GO:0006921,GO:0006996,GO:0007154,GO:0007165,GO:0008150,GO:0008152,GO:0008219,GO:…	K02311	K02311	L	Replication, recombination and repair	PF02017, PF09230
pdam_00000453	0.310901	-0.223233	0.626524	0.503617	0.654318	0.0403263	NA	NA	Upregulated	NA	QRFPR: Pyroglutamylated RFamide peptide receptor (Homo sapiens)	GO:0004930, GO:0007186, GO:0016021	GO:0005575,GO:0005623,GO:0005886,GO:0016020,GO:0044464,GO:0071944	NA	NA	T	Signal transduction mechanisms	PF00001
pdam_00000454	0.235808	0.31197	0.694955	0.294922	0.117711	4.06137e-06	NA	NA	Upregulated	NA	unknown function	NA	NA	NA	NA	NA	NA	NA
pdam_00000455	0.114274	0.0693872	0.0651548	0.530501	0.73355	0.623749	NA	NA	NA	LSG1	Lsg1: Large subunit GTPase 1 homolog (Mus musculus)	GO:0005525	GO:0000003,GO:0000027,GO:0000054,GO:0000166,GO:0000746,GO:0000747,GO:0001882,GO:0001883,GO:0002119,GO:0002164,GO:0003006,GO:0003674,GO:0003824,GO:0003924,GO:0005488,GO:0005525,GO:0005575,GO:0005622,GO:0005623,GO:0005634,GO:0005654,GO:0005737,GO:0005783,GO:0005829,GO:0005840,GO:0005937,GO:0006139,GO:0006152,GO:0006163,GO:0006184,GO:0006195,GO:0006725,GO:0006753,GO:0006793,GO:0006796,GO:0006807,GO:…	K14539	K14539	NA	NA	PF01926
pdam_00000457	0.105881	-0.0940275	-0.306019	0.62688	0.670681	0.0240636	NA	NA	Downregulated	NOP2	NOP2: Probable 28S rRNA (cytosine(4447)-C(5))-methyltransferase (Homo sapiens)	GO:0003723, GO:0006364, GO:0008168, GO:0008757	GO:0000003,GO:0000154,GO:0000463,GO:0000470,GO:0001510,GO:0002119,GO:0002164,GO:0003674,GO:0003824,GO:0005575,GO:0005622,GO:0005623,GO:0005634,GO:0005730,GO:0005737,GO:0005829,GO:0006139,GO:0006364,GO:0006396,GO:0006725,GO:0006807,GO:0006928,GO:0007275,GO:0007568,GO:0008150,GO:0008152,GO:0008168,GO:0008173,GO:0008283,GO:0008284,GO:0008340,GO:0008757,GO:0009451,GO:0009653,GO:0009790,GO:0009791,GO:…	K14835	K14835	A	RNA processing and modification	PF01189, PF17125
pdam_00000458	0.22498	0.0614037	0.0107616	0.21052	0.794192	0.946162	NA	NA	NA	NA	TMEM26: Transmembrane protein 26 (Homo sapiens)	NA	NA	NA	NA	NA	NA	PF09772
pdam_00000459	0.127268	-0.168541	-0.310486	0.546606	0.38904	0.0229516	NA	NA	Downregulated	TRAIP	Traip: E3 ubiquitin-protein ligase TRAIP (Mus musculus)	NA	GO:0003674,GO:0004871,GO:0005057,GO:0005575,GO:0005622,GO:0005623,GO:0005737,GO:0005886,GO:0006917,GO:0006950,GO:0006952,GO:0006996,GO:0007154,GO:0007165,GO:0007346,GO:0008150,GO:0008283,GO:0009987,GO:0010941,GO:0010942,GO:0012502,GO:0016020,GO:0016043,GO:0023052,GO:0040008,GO:0040014,GO:0040018,GO:0042981,GO:0043065,GO:0043067,GO:0043068,GO:0044424,GO:0044444,GO:0044464,GO:0044699,GO:0044700,GO:…	K11985	K11985	O	Posttranslational modification, protein turnover, chaperones	NA
pdam_00000460	-0.0144767	0.235344	0.277356	0.963108	0.269916	0.0810593	NA	NA	NA	CCDC63	ODA1: Outer dynein arm protein 1 (Chlamydomonas reinhardtii)	NA	GO:0005575,GO:0005622,GO:0005623,GO:0005737,GO:0005929,GO:0005930,GO:0031514,GO:0032838,GO:0035085,GO:0042995,GO:0043226,GO:0043227,GO:0043229,GO:0043231,GO:0044422,GO:0044424,GO:0044441,GO:0044444,GO:0044446,GO:0044463,GO:0044464,GO:0097014	NA	NA	NA	NA	NA
pdam_00000462	0.0558879	0.222491	0.332347	0.863788	0.360197	0.0556773	NA	NA	NA	MRPL20	rplT: 50S ribosomal protein L20 (Orientia tsutsugamushi (strain Ikeda))	GO:0003735, GO:0005622, GO:0005840, GO:0006412, GO:0019843	GO:0000313,GO:0000315,GO:0003674,GO:0003735,GO:0005198,GO:0005575,GO:0005622,GO:0005623,GO:0005737,GO:0005739,GO:0005759,GO:0005761,GO:0005762,GO:0005840,GO:0006412,GO:0007275,GO:0008150,GO:0008152,GO:0009058,GO:0009059,GO:0009790,GO:0009792,GO:0009987,GO:0010467,GO:0015934,GO:0019538,GO:0030529,GO:0031974,GO:0032501,GO:0032502,GO:0032991,GO:0034645,GO:0043170,GO:0043226,GO:0043227,GO:0043228,GO:…	K02887	K02887	J	Translation, ribosomal structure and biogenesis	PF00453
pdam_00000463	0.272308	0.268714	0.208811	0.413739	0.414274	0.391734	NA	NA	NA	NCL	NSR1: Nuclear localization sequence-binding protein (Saccharomyces cerevisiae (strain ATCC 204508 / S288c))	GO:0003676	GO:0003674,GO:0003676,GO:0003677,GO:0003723,GO:0005488,GO:0005575,GO:0005622,GO:0005623,GO:0005634,GO:0005730,GO:0005737,GO:0005911,GO:0006417,GO:0008150,GO:0009506,GO:0009889,GO:0010468,GO:0010556,GO:0010608,GO:0019222,GO:0030054,GO:0030529,GO:0031323,GO:0031326,GO:0031974,GO:0031981,GO:0032268,GO:0032991,GO:0042162,GO:0043226,GO:0043227,GO:0043228,GO:0043229,GO:0043231,GO:0043232,GO:0043233,GO:…	K11294	K11294,K12891,K13126	NA	NA	PF00076
pdam_00000465	-2.04657	-0.388621	-4.30014	0.0171689	0.75518	1.78786e-10	Downregulated	NA	Downregulated	NA	unknown function	NA	NA	NA	NA	NA	NA	NA
pdam_00000467	-0.0634975	-0.149731	-0.381048	0.751828	0.367036	0.000853922	NA	NA	Downregulated	AHCTF1	ahctf1: Protein ELYS (Xenopus laevis)	GO:0005515	GO:0000236,GO:0000775,GO:0000776,GO:0000777,GO:0000779,GO:0000793,GO:0000910,GO:0001071,GO:0002376,GO:0002520,GO:0003674,GO:0003700,GO:0005575,GO:0005622,GO:0005623,GO:0005634,GO:0005635,GO:0005643,GO:0005654,GO:0005694,GO:0005737,GO:0005829,GO:0006355,GO:0006461,GO:0006996,GO:0006997,GO:0006999,GO:0007049,GO:0007275,GO:0008150,GO:0009889,GO:0009891,GO:0009893,GO:0009987,GO:0010468,GO:0010556,GO:…	NA	NA	K	Transcription	PF13934, PF16687
pdam_00000477	-0.0462101	-0.150677	-0.200855	0.845441	0.424207	0.129965	NA	NA	NA	XRN1	XRN1: 5'-3' exoribonuclease 1 (Homo sapiens)	GO:0000956, GO:0003676, GO:0004527, GO:0008409	GO:0000003,GO:0000184,GO:0000287,GO:0000288,GO:0000291,GO:0000723,GO:0000932,GO:0000956,GO:0001700,GO:0002009,GO:0002119,GO:0002164,GO:0002165,GO:0003674,GO:0003824,GO:0004518,GO:0004527,GO:0004532,GO:0004534,GO:0004536,GO:0004540,GO:0005488,GO:0005575,GO:0005622,GO:0005623,GO:0005737,GO:0005794,GO:0005829,GO:0005856,GO:0005886,GO:0006139,GO:0006259,GO:0006364,GO:0006396,GO:0006401,GO:0006402,GO:…	K12618	K12618,K12619	NA	NA	PF03159
pdam_00000479	-0.187842	-0.175793	-0.274256	0.177879	0.18394	0.00637894	NA	NA	Downregulated	PGUG_01708	Osbp2: Oxysterol-binding protein 2 (Mus musculus)	NA	GO:0000138,GO:0003674,GO:0005215,GO:0005319,GO:0005488,GO:0005496,GO:0005543,GO:0005545,GO:0005575,GO:0005622,GO:0005623,GO:0005634,GO:0005635,GO:0005737,GO:0005768,GO:0005769,GO:0005783,GO:0005794,GO:0005795,GO:0005829,GO:0005886,GO:0005933,GO:0005935,GO:0005938,GO:0006629,GO:0006810,GO:0006869,GO:0006887,GO:0006897,GO:0006950,GO:0007163,GO:0008142,GO:0008150,GO:0008152,GO:0008289,GO:0009987,GO:…	K20463	K06867,K17656	I	Lipid transport and metabolism	PF012370
pdam_00000498	-1.59369	-0.780181	-2.14733	5.59961e-06	0.0476765	7.05087e-12	Downregulated	Downregulated	Downregulated	NA	Insoluble matrix shell protein 1 (Fragment) (Ruditapes philippinarum)	NA	NA	NA	NA	NA	NA	NA
pdam_00000503	-1.21792	-0.656622	-1.75251	0.000138098	0.0694055	3.72702e-10	Downregulated	NA	Downregulated	NA	Insoluble matrix shell protein 1 (Fragment) (Ruditapes philippinarum)	NA	NA	NA	NA	NA	NA	NA
pdam_00000504	0.150448	0.117118	1.78696	0.860156	0.899171	4.523e-05	NA	NA	Upregulated	NA	unknown function	NA	NA	NA	NA	NA	NA	NA
pdam_00000505	0.363665	-0.0634575	0.220112	0.00686982	0.750208	0.0541957	Upregulated	NA	NA	PGUG_04978	Srsf4: Serine/arginine-rich splicing factor 4 (Mus musculus)	GO:0003676	GO:0000003,GO:0000245,GO:0000278,GO:0000280,GO:0000375,GO:0000377,GO:0000381,GO:0000398,GO:0000785,GO:0000993,GO:0001098,GO:0001099,GO:0001703,GO:0002009,GO:0002119,GO:0002164,GO:0003006,GO:0003674,GO:0003676,GO:0003723,GO:0003727,GO:0003729,GO:0005488,GO:0005515,GO:0005575,GO:0005622,GO:0005623,GO:0005634,GO:0005654,GO:0005681,GO:0005694,GO:0005700,GO:0005737,GO:0006139,GO:0006355,GO:0006357,GO:…	NA	K12893,K14651	A	RNA processing and modification	PF00076
pdam_00000506	0.117629	0.228878	0.617915	0.676124	0.33676	0.000167501	NA	NA	Upregulated	LAMTOR2	LAMTOR2: Ragulator complex protein LAMTOR2 (Homo sapiens)	NA	GO:0000186,GO:0000323,GO:0001101,GO:0001932,GO:0001934,GO:0005575,GO:0005622,GO:0005623,GO:0005737,GO:0005764,GO:0005765,GO:0005768,GO:0005770,GO:0005773,GO:0005774,GO:0005794,GO:0008104,GO:0008150,GO:0009719,GO:0009893,GO:0009966,GO:0009967,GO:0009987,GO:0010008,GO:0010033,GO:0010243,GO:0010562,GO:0010604,GO:0010627,GO:0010646,GO:0010647,GO:0016020,GO:0016049,GO:0019220,GO:0019222,GO:0023051,GO:…	K20398	NA	T	Signal transduction mechanisms	PF032596
pdam_00000507	0.030246	0.0880852	0.0763895	0.894984	0.64706	0.562797	NA	NA	NA	ARHGAP17	Arhgap44: Rho GTPase-activating protein 44 (Mus musculus)	GO:0005515, GO:0005737, GO:0007165	GO:0002165,GO:0003008,GO:0003674,GO:0005083,GO:0005096,GO:0005099,GO:0005100,GO:0005575,GO:0005622,GO:0005623,GO:0005737,GO:0005829,GO:0005911,GO:0005923,GO:0006140,GO:0006810,GO:0006887,GO:0006996,GO:0007010,GO:0007015,GO:0007154,GO:0007165,GO:0007264,GO:0007267,GO:0007268,GO:0007274,GO:0007275,GO:0007444,GO:0007478,GO:0007480,GO:0007552,GO:0007560,GO:0008047,GO:0008150,GO:0008582,GO:0009118,GO:…	K20638	K07758	T	Signal transduction mechanisms	PF00620, PF031147
pdam_00000508	-0.109221	-0.0600567	-0.194078	0.493843	0.739311	0.0693845	NA	NA	NA	NA	unknown function	NA	NA	NA	NA	NA	NA	NA
pdam_00000509	0.0479867	-0.158153	0.0427283	0.923779	0.720591	0.888608	NA	NA	NA	SLC25A10	SLC25A10: Mitochondrial dicarboxylate carrier (Homo sapiens)	GO:0055085	GO:0000096,GO:0000098,GO:0000313,GO:0000315,GO:0003674,GO:0005215,GO:0005310,GO:0005315,GO:0005342,GO:0005575,GO:0005622,GO:0005623,GO:0005634,GO:0005737,GO:0005739,GO:0005740,GO:0005743,GO:0005759,GO:0005761,GO:0005762,GO:0005840,GO:0005975,GO:0005996,GO:0006006,GO:0006082,GO:0006094,GO:0006520,GO:0006790,GO:0006807,GO:0006810,GO:0006811,GO:0006817,GO:0006820,GO:0006835,GO:0006839,GO:0008150,GO:…	K13577	K13577,K15104	C	Energy production and conversion	PF001536
pdam_00000511	0.151707	0.189279	0.307942	0.503237	0.357799	0.0370844	NA	NA	Upregulated	FG00457.1	SPAC25B8.10: Uncharacterized methyltransferase-like C25B8.10 (Schizosaccharomyces pombe (strain 972 / ATCC 24843))	GO:0008152, GO:0008168	GO:0003674,GO:0003824,GO:0005575,GO:0005622,GO:0005623,GO:0005634,GO:0005737,GO:0005829,GO:0005975,GO:0008150,GO:0008152,GO:0008168,GO:0008757,GO:0009987,GO:0016740,GO:0016741,GO:0032259,GO:0043226,GO:0043227,GO:0043229,GO:0043231,GO:0044237,GO:0044238,GO:0044262,GO:0044424,GO:0044444,GO:0044464,GO:0046547,GO:0071704	NA	K08143,K14300	NA	NA	PF08241
pdam_00000512	-0.991073	-0.642913	-0.805295	0.074011	0.270436	0.0619986	NA	NA	NA	NA	nog2: Noggin-2 (Danio rerio)	GO:0030514, GO:0045596	NA	NA	K04658	T	Signal transduction mechanisms	PF05806
pdam_00000513	0.112939	0.0126252	0.108625	0.558364	0.965926	0.417413	NA	NA	NA	UTP6	Utp6: U3 small nucleolar RNA-associated protein 6 homolog (Mus musculus)	GO:0000462, GO:0005515, GO:0006396, GO:0030515	GO:0000447,GO:0000460,GO:0000462,GO:0000466,GO:0000469,GO:0000472,GO:0000478,GO:0000479,GO:0000480,GO:0000922,GO:0000966,GO:0000967,GO:0003674,GO:0003676,GO:0003723,GO:0005488,GO:0005575,GO:0005622,GO:0005623,GO:0005634,GO:0005730,GO:0005732,GO:0005737,GO:0005815,GO:0005816,GO:0005819,GO:0005829,GO:0005856,GO:0006139,GO:0006364,GO:0006396,GO:0006725,GO:0006807,GO:0007275,GO:0007399,GO:0008150,GO:…	K14557	K14557	A	RNA processing and modification	PF08640
pdam_00000518	0.0364403	-0.0646949	-0.038329	0.880219	0.772478	0.796128	NA	NA	NA	DUS1L	DUS1L: tRNA-dihydrouridine(16/17) synthase [NAD(P)(+)]-like (Homo sapiens)	GO:0008033, GO:0017150, GO:0050660, GO:0055114	GO:0002943,GO:0003674,GO:0003824,GO:0005575,GO:0005622,GO:0005623,GO:0005634,GO:0005737,GO:0005739,GO:0006139,GO:0006396,GO:0006399,GO:0006400,GO:0006725,GO:0006807,GO:0008033,GO:0008150,GO:0008152,GO:0009451,GO:0009987,GO:0010467,GO:0016070,GO:0016491,GO:0016627,GO:0017150,GO:0034470,GO:0034641,GO:0034660,GO:0043170,GO:0043226,GO:0043227,GO:0043229,GO:0043231,GO:0043412,GO:0044237,GO:0044238,GO:…	NA	K05542,K05545	J	Translation, ribosomal structure and biogenesis	NA
pdam_00000519	-0.320528	0.0603059	-0.127756	0.165611	0.851597	0.489964	NA	NA	NA	NA	unknown function	NA	NA	NA	NA	NA	NA	NA
pdam_00000521	-0.588769	-0.217873	-0.385598	0.0276728	0.506017	0.0782255	Downregulated	NA	NA	NA	unknown function	NA	NA	NA	NA	NA	NA	NA
pdam_00000522	0.265465	-0.129553	0.303117	0.359252	NA	0.142686	NA	NA	NA	DUS1L	DUS1L: tRNA-dihydrouridine(16/17) synthase [NAD(P)(+)]-like (Homo sapiens)	GO:0003824, GO:0008033, GO:0017150, GO:0050660, GO:0055114	GO:0002943,GO:0003674,GO:0003824,GO:0005575,GO:0005622,GO:0005623,GO:0005634,GO:0005737,GO:0005739,GO:0006139,GO:0006396,GO:0006399,GO:0006400,GO:0006725,GO:0006807,GO:0008033,GO:0008150,GO:0008152,GO:0009451,GO:0009987,GO:0010467,GO:0016070,GO:0016491,GO:0016627,GO:0017150,GO:0034470,GO:0034641,GO:0034660,GO:0043170,GO:0043226,GO:0043227,GO:0043229,GO:0043231,GO:0043412,GO:0044237,GO:0044238,GO:…	K05542	K05542,K05545	J	Translation, ribosomal structure and biogenesis	PF01207
pdam_00000523	0.339945	0.115688	-0.0166724	0.100661	0.651405	0.931157	NA	NA	NA	ALYREF	alyref-a: THO complex subunit 4-A (Xenopus laevis)	GO:0003676	GO:0000003,GO:0000346,GO:0000375,GO:0000377,GO:0000398,GO:0000988,GO:0000989,GO:0003674,GO:0003676,GO:0003677,GO:0003697,GO:0003712,GO:0003713,GO:0003723,GO:0003729,GO:0005488,GO:0005575,GO:0005622,GO:0005623,GO:0005634,GO:0005635,GO:0005654,GO:0005681,GO:0005730,GO:0005737,GO:0005829,GO:0006139,GO:0006351,GO:0006353,GO:0006366,GO:0006369,GO:0006396,GO:0006397,GO:0006403,GO:0006405,GO:0006406,GO:…	K12881	K12881	A	RNA processing and modification	PF00076, PF07078, PF13865
pdam_00000524	-0.0932692	0.0665117	0.059882	0.64006	0.753533	0.663056	NA	NA	NA	TTC30A	ttc30a: Tetratricopeptide repeat protein 30A (Xenopus tropicalis)	GO:0005515	GO:0000902,GO:0003674,GO:0003824,GO:0005215,GO:0005575,GO:0005622,GO:0005623,GO:0005856,GO:0005874,GO:0005879,GO:0005929,GO:0005930,GO:0006464,GO:0006810,GO:0006928,GO:0006996,GO:0007017,GO:0007018,GO:0007275,GO:0007368,GO:0007389,GO:0008150,GO:0008152,GO:0009653,GO:0009799,GO:0009855,GO:0009987,GO:0010927,GO:0010970,GO:0015630,GO:0016043,GO:0016874,GO:0016879,GO:0016881,GO:0018095,GO:0018193,GO:…	K19683	K19683	NA	NA	PF13432
pdam_00000525	-0.259595	0.0838787	-0.288016	0.0741979	0.640225	0.00953285	NA	NA	Downregulated	NA	unknown function	NA	NA	NA	NA	NA	NA	NA
pdam_00000527	-0.43858	0.566875	0.338416	0.0244303	0.000814037	0.0322833	Downregulated	Upregulated	Upregulated	P4HB	pdi-2: Protein disulfide-isomerase 2 (Caenorhabditis elegans)	GO:0005783, GO:0016853, GO:0045454	GO:0001666,GO:0001703,GO:0002119,GO:0002164,GO:0003674,GO:0003756,GO:0003810,GO:0003824,GO:0004656,GO:0005575,GO:0005576,GO:0005615,GO:0005622,GO:0005623,GO:0005634,GO:0005635,GO:0005737,GO:0005783,GO:0005788,GO:0005791,GO:0005793,GO:0005811,GO:0005886,GO:0006082,GO:0006457,GO:0006464,GO:0006520,GO:0006575,GO:0006621,GO:0006629,GO:0006807,GO:0006915,GO:0006950,GO:0006984,GO:0006986,GO:0007154,GO:…	K09580	K08056,K09580,K09581,K09582	O	Posttranslational modification, protein turnover, chaperones	PF00085, PF13848
pdam_00000528	-0.125762	0.101929	0.106796	0.504253	0.606063	0.426175	NA	NA	NA	ARHGDIB	ARHGDIA: Rho GDP-dissociation inhibitor 1 (Macaca fascicularis)	GO:0005094, GO:0005737	GO:0000902,GO:0000910,GO:0001772,GO:0002376,GO:0003674,GO:0005083,GO:0005092,GO:0005094,GO:0005488,GO:0005515,GO:0005575,GO:0005622,GO:0005623,GO:0005634,GO:0005737,GO:0005829,GO:0005856,GO:0005886,GO:0005933,GO:0005934,GO:0005935,GO:0006810,GO:0006897,GO:0006907,GO:0006928,GO:0006955,GO:0006996,GO:0007010,GO:0007015,GO:0007049,GO:0007154,GO:0007162,GO:0007165,GO:0007166,GO:0007167,GO:0007169,GO:…	K12462	K12462	T	Signal transduction mechanisms	PF02115
pdam_00000530	0.0906626	0.061522	0.42935	0.727915	0.831054	0.00412233	NA	NA	Upregulated	TMEM184A	TMEM184B: Transmembrane protein 184B (Homo sapiens)	NA	GO:0000003,GO:0003006,GO:0003674,GO:0005215,GO:0005488,GO:0005575,GO:0005622,GO:0005623,GO:0005737,GO:0005768,GO:0005769,GO:0006810,GO:0006950,GO:0006952,GO:0007275,GO:0007399,GO:0007530,GO:0008037,GO:0008038,GO:0008039,GO:0008150,GO:0009607,GO:0009620,GO:0009987,GO:0010008,GO:0016020,GO:0016021,GO:0018992,GO:0022008,GO:0022414,GO:0022857,GO:0030154,GO:0030182,GO:0030246,GO:0031090,GO:0031224,GO:…	NA	NA	T	Signal transduction mechanisms	PF03619
pdam_00000532	-0.0866224	-0.15307	-0.0515104	0.760694	0.550627	0.787303	NA	NA	NA	NA	gxcJJ: Rac guanine nucleotide exchange factor JJ (Dictyostelium discoideum)	GO:0005085, GO:0005089, GO:0005515, GO:0035023, GO:0035556	NA	NA	NA	T	Signal transduction mechanisms	PF00621, PF14604
pdam_00000534	0.300855	0.0327634	0.332148	0.183825	0.924583	0.0447623	NA	NA	Upregulated	OSI_08151	LOG7: Cytokinin riboside 5'-monophosphate phosphoribohydrolase LOG7 (Arabidopsis thaliana)	NA	GO:0005575,GO:0005622,GO:0005623,GO:0005634,GO:0005737,GO:0005829,GO:0006725,GO:0006807,GO:0008150,GO:0008152,GO:0009058,GO:0009308,GO:0009690,GO:0009691,GO:0009719,GO:0009987,GO:0010033,GO:0010243,GO:0010817,GO:0014070,GO:0014074,GO:0034754,GO:0042221,GO:0042445,GO:0042446,GO:0043226,GO:0043227,GO:0043229,GO:0043231,GO:0044237,GO:0044249,GO:0044424,GO:0044444,GO:0044464,GO:0046483,GO:0048509,GO:…	K22522	K06966	NA	NA	PF03641
pdam_00000535	0.0979127	-0.0260042	0.0238	0.682345	0.931043	0.888608	NA	NA	NA	RNPS1	rnps1-a: RNA-binding protein with serine-rich domain 1-A (Xenopus laevis)	GO:0003676	GO:0000003,GO:0000184,GO:0000375,GO:0000377,GO:0000398,GO:0000956,GO:0002119,GO:0002164,GO:0003006,GO:0003674,GO:0003676,GO:0003677,GO:0003723,GO:0003729,GO:0003730,GO:0005488,GO:0005575,GO:0005622,GO:0005623,GO:0005634,GO:0005654,GO:0005681,GO:0005737,GO:0005829,GO:0006139,GO:0006351,GO:0006353,GO:0006355,GO:0006366,GO:0006369,GO:0006396,GO:0006397,GO:0006401,GO:0006402,GO:0006403,GO:0006405,GO:…	K14325	K12891,K14325	A	RNA processing and modification	PF00076
pdam_00000536	0.208056	0.212704	0.107326	0.394291	0.364612	0.563021	NA	NA	NA	FAM86A	EEF2KMT: Protein-lysine N-methyltransferase EEF2KMT (Homo sapiens)	NA	GO:0003674,GO:0003824,GO:0005575,GO:0005622,GO:0005623,GO:0005737,GO:0008150,GO:0008152,GO:0008168,GO:0008757,GO:0016740,GO:0016741,GO:0032259,GO:0044424,GO:0044464	K22696	NA	NA	NA	PF10294, PF14904
pdam_00000537	0.35042	0.152502	0.207069	0.0757591	0.510307	0.192965	NA	NA	NA	TEX2	TEX2: Testis-expressed protein 2 (Homo sapiens)	NA	GO:0003674,GO:0005488,GO:0005575,GO:0005622,GO:0005623,GO:0005737,GO:0005773,GO:0005783,GO:0005789,GO:0006629,GO:0006643,GO:0006665,GO:0006807,GO:0006950,GO:0007154,GO:0007165,GO:0008150,GO:0008152,GO:0008289,GO:0009987,GO:0012505,GO:0016020,GO:0016021,GO:0023052,GO:0031090,GO:0031224,GO:0033554,GO:0042175,GO:0043226,GO:0043227,GO:0043229,GO:0043231,GO:0044232,GO:0044237,GO:0044238,GO:0044255,GO:…	NA	NA	NA	NA	PF10296
pdam_00000538	-0.229861	0.00774427	-0.304753	0.192749	0.979575	0.0169197	NA	NA	Downregulated	ERN1	Ern2: Serine/threonine-protein kinase/endoribonuclease IRE2 (Mus musculus)	GO:0004540, GO:0004672, GO:0005524, GO:0006397, GO:0006468	GO:0000003,GO:0000166,GO:0000287,GO:0000394,GO:0001882,GO:0001883,GO:0001932,GO:0001934,GO:0002119,GO:0002164,GO:0003674,GO:0003824,GO:0004518,GO:0004519,GO:0004521,GO:0004540,GO:0004672,GO:0004674,GO:0005488,GO:0005515,GO:0005524,GO:0005575,GO:0005622,GO:0005623,GO:0005634,GO:0005635,GO:0005637,GO:0005737,GO:0005739,GO:0005783,GO:0005789,GO:0005975,GO:0006020,GO:0006066,GO:0006139,GO:0006355,GO:…	K08852	K08852,K11715	T	Signal transduction mechanisms	PF00069, PF06479
pdam_00000539	-0.124457	-0.167321	-0.244204	0.381364	0.188631	0.0113582	NA	NA	Downregulated	TNRC6B	Tnrc6a: Trinucleotide repeat-containing gene 6A protein (Mus musculus)	GO:0003676, GO:0005515, GO:0035278	GO:0000932,GO:0005575,GO:0005622,GO:0005623,GO:0005737,GO:0005829,GO:0007154,GO:0007165,GO:0007166,GO:0007219,GO:0008150,GO:0008152,GO:0009987,GO:0010467,GO:0023052,GO:0030529,GO:0032991,GO:0035770,GO:0043170,GO:0043226,GO:0043228,GO:0043229,GO:0043232,GO:0044424,GO:0044444,GO:0044464,GO:0044699,GO:0044700,GO:0044763,GO:0050789,GO:0050794,GO:0050896,GO:0051716,GO:0065007,GO:0071704	K18412	K18412	NA	NA	PF00226, PF00627
pdam_00000552	0.390307	-0.132769	-0.75825	0.314854	0.788629	0.0050801	NA	NA	Downregulated	LIG1	lig1: DNA ligase 1 (Xenopus laevis)	GO:0003677, GO:0003909, GO:0003910, GO:0005524, GO:0006281, GO:0006310, GO:0051103, GO:0071897	GO:0000012,GO:0000084,GO:0000228,GO:0000278,GO:0000302,GO:0000722,GO:0000723,GO:0000724,GO:0000725,GO:0000726,GO:0000910,GO:0003674,GO:0003676,GO:0003677,GO:0003824,GO:0003909,GO:0003910,GO:0005488,GO:0005575,GO:0005622,GO:0005623,GO:0005634,GO:0005654,GO:0005657,GO:0005694,GO:0005737,GO:0005739,GO:0006139,GO:0006259,GO:0006260,GO:0006261,GO:0006266,GO:0006271,GO:0006273,GO:0006281,GO:0006283,GO:…	K10747	K10747	L	Replication, recombination and repair	PF01068, PF04675, PF046798
pdam_00000553	0.244022	0.124792	0.134364	0.24443	0.602679	0.407527	NA	NA	NA	RAC1	Rac1: Ras-related C3 botulinum toxin substrate 1 (Rattus norvegicus)	GO:0003924, GO:0005525, GO:0005622, GO:0007264	GO:0000003,GO:0000139,GO:0000165,GO:0000166,GO:0000226,GO:0000578,GO:0000768,GO:0000902,GO:0000904,GO:0000910,GO:0000912,GO:0000915,GO:0001654,GO:0001667,GO:0001700,GO:0001704,GO:0001707,GO:0001726,GO:0001736,GO:0001737,GO:0001738,GO:0001745,GO:0001751,GO:0001754,GO:0001764,GO:0001775,GO:0001776,GO:0001780,GO:0001817,GO:0001818,GO:0001882,GO:0001883,GO:0001891,GO:0001894,GO:0002009,GO:0002064,GO:…	K04392	K04392,K07860,K07861	T	Signal transduction mechanisms	PF00071
pdam_00000554	-0.711201	-0.338909	-0.301142	0.00262752	0.214372	0.154954	Downregulated	NA	NA	TOB1	TOB2: Protein Tob2 (Homo sapiens)	NA	GO:0000003,GO:0000988,GO:0000989,GO:0001708,GO:0002064,GO:0003002,GO:0003006,GO:0003674,GO:0003712,GO:0003714,GO:0005070,GO:0005488,GO:0005515,GO:0005575,GO:0005622,GO:0005623,GO:0005634,GO:0005737,GO:0006355,GO:0006357,GO:0006605,GO:0006606,GO:0006810,GO:0006886,GO:0006897,GO:0006898,GO:0006913,GO:0007154,GO:0007165,GO:0007166,GO:0007167,GO:0007178,GO:0007184,GO:0007275,GO:0007276,GO:0007281,GO:…	K14443	K14443	T	Signal transduction mechanisms	PF077426
pdam_00000555	-0.0263039	-0.200421	-0.503835	0.895084	0.127024	5.82972e-07	NA	NA	Downregulated	RHOT2	rhot1a: Mitochondrial Rho GTPase 1-A (Danio rerio)	GO:0003924, GO:0005509, GO:0005525, GO:0005739, GO:0007005, GO:0007264, GO:0031307	GO:0000001,GO:0000003,GO:0000226,GO:0000902,GO:0000904,GO:0002119,GO:0002164,GO:0003006,GO:0003008,GO:0003674,GO:0003824,GO:0003924,GO:0005488,GO:0005509,GO:0005575,GO:0005622,GO:0005623,GO:0005634,GO:0005635,GO:0005737,GO:0005739,GO:0005740,GO:0005741,GO:0005743,GO:0005783,GO:0005789,GO:0005829,GO:0005886,GO:0006139,GO:0006152,GO:0006163,GO:0006184,GO:0006195,GO:0006725,GO:0006753,GO:0006793,GO:…	K07870	K06883,K07870,K07871	V	Defense mechanisms	PF00071, PF08355, PF08356
pdam_00000557	-0.235903	-0.00181794	-0.101901	0.161772	0.99556	0.45087	NA	NA	NA	RPS15A	RpS15Aa: 40S ribosomal protein S15a (Drosophila yakuba)	GO:0003735, GO:0005840, GO:0006412	GO:0000003,GO:0000022,GO:0000184,GO:0000226,GO:0000278,GO:0000956,GO:0002119,GO:0002164,GO:0002181,GO:0003674,GO:0003676,GO:0003723,GO:0003735,GO:0005198,GO:0005488,GO:0005575,GO:0005576,GO:0005615,GO:0005618,GO:0005622,GO:0005623,GO:0005634,GO:0005737,GO:0005773,GO:0005774,GO:0005829,GO:0005840,GO:0005886,GO:0005911,GO:0006139,GO:0006401,GO:0006402,GO:0006412,GO:0006413,GO:0006414,GO:0006415,GO:…	K02957	K02957,K07901,K10626	J	Translation, ribosomal structure and biogenesis	PF00410
pdam_00000558	0.242325	-0.0874192	-0.11788	0.0814343	0.608103	0.302845	NA	NA	NA	EML5	EML6: Echinoderm microtubule-associated protein-like 6 (Homo sapiens)	GO:0005515	GO:0005575,GO:0005622,GO:0005623,GO:0005856,GO:0043226,GO:0043228,GO:0043229,GO:0043232,GO:0044424,GO:0044464	NA	K18597,K18598	NA	NA	PF00400, PF03451, PF12894
pdam_00000559	-0.354981	0.15976	0.199636	0.292248	0.667249	0.426176	NA	NA	NA	WTRW	TRPA1: Transient receptor potential cation channel subfamily A member 1 (Homo sapiens)	GO:0005216, GO:0005515, GO:0006811, GO:0016020, GO:0055085	GO:0003008,GO:0003674,GO:0005215,GO:0005216,GO:0005261,GO:0005262,GO:0006810,GO:0006811,GO:0006812,GO:0006816,GO:0007600,GO:0007605,GO:0008150,GO:0008324,GO:0009270,GO:0009415,GO:0009628,GO:0009987,GO:0010035,GO:0015075,GO:0015085,GO:0015267,GO:0022803,GO:0022838,GO:0022857,GO:0022890,GO:0022891,GO:0022892,GO:0030001,GO:0032501,GO:0034220,GO:0042221,GO:0044699,GO:0044707,GO:0044763,GO:0044765,GO:…	NA	K02996	J	Translation, ribosomal structure and biogenesis	PF00023, PF00520, PF12796, PF13857
pdam_00000560	-0.173125	-0.173742	-0.713133	0.42319	0.410957	3.76165e-07	NA	NA	Downregulated	NA	WDR49: WD repeat-containing protein 49 (Homo sapiens)	GO:0005509, GO:0005515	NA	NA	NA	NA	NA	PF00400, PF13833
pdam_00000561	-0.197713	-0.334413	-0.57799	0.444901	0.128874	0.000675098	NA	NA	Downregulated	NA	TrpA1: Transient receptor potential cation channel subfamily A member 1 (Drosophila melanogaster)	GO:0005216, GO:0005515, GO:0006811, GO:0016020, GO:0055085	NA	NA	NA	J	Translation, ribosomal structure and biogenesis	PF00520, PF12796, PF13637
pdam_00000564	-0.0785647	-0.107836	-0.402428	0.707098	0.57962	0.000838789	NA	NA	Downregulated	PGUG_03144	SPAC637.09: Uncharacterized exonuclease C637.09 (Schizosaccharomyces pombe (strain 972 / ATCC 24843))	GO:0003676	GO:0000175,GO:0000459,GO:0000460,GO:0000466,GO:0000467,GO:0000469,GO:0000481,GO:0002107,GO:0003674,GO:0003824,GO:0004518,GO:0004527,GO:0004532,GO:0004540,GO:0005575,GO:0005622,GO:0005623,GO:0005634,GO:0005730,GO:0006139,GO:0006364,GO:0006396,GO:0006399,GO:0006725,GO:0006807,GO:0008033,GO:0008150,GO:0008152,GO:0008408,GO:0009987,GO:0010467,GO:0016070,GO:0016072,GO:0016073,GO:0016180,GO:0016787,GO:…	K14570	K14570	L	Replication, recombination and repair	PF00929
pdam_00000565	0.117179	-0.00199528	-0.0385963	0.649943	0.996058	0.833351	NA	NA	NA	SNX14	SNX14: Sorting nexin-14 (Homo sapiens)	GO:0035091	GO:0000003,GO:0005575,GO:0008150,GO:0016020	K17926	K17926	U	Intracellular trafficking, secretion, and vesicular transport	PF00615, PF00787, PF02194, PF08628
pdam_00000567	-0.316038	-0.12981	-0.486739	0.167999	0.617415	0.0037856	NA	NA	Downregulated	NA	Dop1R1: Dopamine receptor 1 (Drosophila melanogaster)	GO:0004930, GO:0007186, GO:0016021	NA	NA	NA	U	Intracellular trafficking, secretion, and vesicular transport	PF00001
pdam_00000568	0.205327	0.373711	0.814992	0.319037	0.0283691	2.52449e-09	NA	Upregulated	Upregulated	PMM1	PMM: Phosphomannomutase (Oryza sativa subsp. japonica)	GO:0004615, GO:0005737, GO:0009298	GO:0000902,GO:0000904,GO:0001501,GO:0001666,GO:0002062,GO:0002063,GO:0003674,GO:0003824,GO:0004615,GO:0005575,GO:0005622,GO:0005623,GO:0005634,GO:0005737,GO:0005829,GO:0005975,GO:0005996,GO:0006013,GO:0006082,GO:0006139,GO:0006464,GO:0006486,GO:0006487,GO:0006488,GO:0006605,GO:0006725,GO:0006753,GO:0006766,GO:0006767,GO:0006793,GO:0006796,GO:0006807,GO:0006810,GO:0006886,GO:0006888,GO:0006950,GO:…	K17497	K17497	G	Carbohydrate transport and metabolism	PF03332,
pdam_00000569	-0.13518	0.121956	0.147944	0.462767	0.512545	0.248393	NA	NA	NA	FUCA2	BRAFLDRAFT_56888: Alpha-L-fucosidase (Branchiostoma floridae)	GO:0004560, GO:0005975, GO:0006004	GO:0000323,GO:0003674,GO:0003824,GO:0004553,GO:0004560,GO:0005488,GO:0005575,GO:0005576,GO:0005615,GO:0005622,GO:0005623,GO:0005737,GO:0005764,GO:0005773,GO:0005975,GO:0005996,GO:0006004,GO:0006022,GO:0006026,GO:0006027,GO:0006807,GO:0006950,GO:0006952,GO:0008150,GO:0008152,GO:0009056,GO:0009057,GO:0009607,GO:0009617,GO:0015928,GO:0016137,GO:0016139,GO:0016787,GO:0016798,GO:0019318,GO:0030203,GO:…	K01206	K01206	G	Carbohydrate transport and metabolism	PF01120, PF16757
pdam_00000572	0.0767037	-0.17521	-0.163971	0.663075	0.216845	0.140927	NA	NA	NA	EME1	EME1: Crossover junction endonuclease EME1 (Pongo abelii)	GO:0003677, GO:0004518, GO:0005634, GO:0006281, GO:0048476	GO:0005575,GO:0005622,GO:0005623,GO:0005634,GO:0005730,GO:0031974,GO:0031981,GO:0043226,GO:0043227,GO:0043228,GO:0043229,GO:0043231,GO:0043232,GO:0043233,GO:0044422,GO:0044424,GO:0044428,GO:0044446,GO:0044464,GO:0070013	K10882	K10882	L	Replication, recombination and repair	PF02732
pdam_00000574	-0.00219066	0.361261	0.601682	0.996971	0.487484	0.0842148	NA	NA	NA	NA	unknown function	NA	NA	NA	NA	NA	NA	NA
pdam_00000578	-0.456745	-0.100131	-0.42754	0.164609	0.819602	0.0815866	NA	NA	NA	APP	U-actitoxin-Avd3m (Anemonia viridis)	GO:0004867	GO:0000003,GO:0000085,GO:0000278,GO:0000902,GO:0000904,GO:0001932,GO:0002009,GO:0003008,GO:0003674,GO:0003676,GO:0003677,GO:0005488,GO:0005575,GO:0005622,GO:0005623,GO:0005737,GO:0005794,GO:0005905,GO:0006139,GO:0006378,GO:0006396,GO:0006397,GO:0006417,GO:0006464,GO:0006468,GO:0006725,GO:0006793,GO:0006796,GO:0006807,GO:0006810,GO:0006873,GO:0006875,GO:0006878,GO:0006897,GO:0006917,GO:0006928,GO:…	NA	K04520	Z	Cytoskeleton	PF00014
pdam_00000581	-0.0449382	-0.085362	-0.151996	0.767585	0.527789	0.0901492	NA	NA	NA	2021-09-12	SEPT3: Neuronal-specific septin-3 (Bos taurus)	GO:0005525	GO:0000144,GO:0000166,GO:0000278,GO:0000280,GO:0000399,GO:0000910,GO:0000920,GO:0000921,GO:0001400,GO:0001725,GO:0001882,GO:0001883,GO:0003674,GO:0003824,GO:0003924,GO:0005198,GO:0005488,GO:0005515,GO:0005525,GO:0005543,GO:0005545,GO:0005575,GO:0005622,GO:0005623,GO:0005628,GO:0005634,GO:0005737,GO:0005819,GO:0005829,GO:0005856,GO:0005874,GO:0005876,GO:0005929,GO:0005933,GO:0005935,GO:0005937,GO:…	K16938	K16938,K16945	NA	NA	PF00735
pdam_00000583	-0.639867	-0.265109	-1.80416	0.12276	0.58584	3.71104e-09	NA	NA	Downregulated	NA	KCNA10: Potassium voltage-gated channel subfamily A member 10 (Gallus gallus)	GO:0004970, GO:0016020	NA	NA	NA	P	Inorganic ion transport and metabolism	PF00060, PF07885
pdam_00000584	0.169606	-0.0375468	0.0701002	0.323135	0.871205	0.604616	NA	NA	NA	RRS1	RRS1: Ribosome biogenesis regulatory protein homolog (Bos taurus)	GO:0005634, GO:0042254	GO:0000003,GO:0000054,GO:0000055,GO:0000070,GO:0000228,GO:0000278,GO:0000280,GO:0000447,GO:0000460,GO:0000462,GO:0000466,GO:0000469,GO:0000478,GO:0000479,GO:0000793,GO:0000794,GO:0000819,GO:0002119,GO:0002164,GO:0003006,GO:0005575,GO:0005622,GO:0005623,GO:0005634,GO:0005654,GO:0005694,GO:0005730,GO:0005737,GO:0005783,GO:0006139,GO:0006364,GO:0006396,GO:0006725,GO:0006807,GO:0006810,GO:0006913,GO:…	K14852	K14852	J	Translation, ribosomal structure and biogenesis	PF04939
pdam_00000585	0.123669	-0.199682	-0.323628	0.295797	0.0465864	6.06177e-05	NA	Downregulated	Downregulated	ZZEF1	ZZEF1: Zinc finger ZZ-type and EF-hand domain-containing protein 1 (Homo sapiens)	GO:0005509, GO:0008270	NA	NA	NA	NA	NA	PF00569, PF03256
pdam_00000586	0.114413	-0.373084	-0.281939	0.807496	0.31164	0.318036	NA	NA	NA	TPMT	TPMT: Thiopurine S-methyltransferase (Gorilla gorilla gorilla)	GO:0008119, GO:0008757	GO:0003674,GO:0003824,GO:0005575,GO:0005622,GO:0005623,GO:0005737,GO:0005829,GO:0006139,GO:0006725,GO:0006805,GO:0006807,GO:0008119,GO:0008150,GO:0008152,GO:0008168,GO:0008172,GO:0008757,GO:0009410,GO:0009987,GO:0016740,GO:0016741,GO:0032259,GO:0034641,GO:0042221,GO:0044237,GO:0044238,GO:0044281,GO:0044424,GO:0044444,GO:0044464,GO:0044699,GO:0044710,GO:0044763,GO:0046483,GO:0050896,GO:0051716,GO:…	K00569	K00569	NA	NA	PF05724
pdam_00000589	-0.11456	-0.10842	0.0651004	0.560441	0.583538	0.646107	NA	NA	NA	PLA2G6	Pla2g6: 85/88 kDa calcium-independent phospholipase A2 (Mus musculus)	GO:0005515, GO:0006629, GO:0008152	GO:0000003,GO:0001932,GO:0001934,GO:0002791,GO:0002793,GO:0003008,GO:0003012,GO:0003674,GO:0003824,GO:0004620,GO:0004623,GO:0005488,GO:0005515,GO:0005575,GO:0005622,GO:0005623,GO:0005737,GO:0005739,GO:0005740,GO:0005743,GO:0005813,GO:0005815,GO:0005829,GO:0005856,GO:0006066,GO:0006576,GO:0006629,GO:0006644,GO:0006650,GO:0006655,GO:0006793,GO:0006796,GO:0006807,GO:0006873,GO:0006874,GO:0006875,GO:…	K16343	K16343	I	Lipid transport and metabolism	PF12796, PF13857
pdam_00000590	0.149123	-0.108901	-0.292955	0.341667	0.51385	0.00853486	NA	NA	Downregulated	SCONB	FBXW7: F-box/WD repeat-containing protein 7 (Bos taurus)	GO:0005515	GO:0000151,GO:0005575,GO:0005622,GO:0005623,GO:0005634,GO:0006464,GO:0006508,GO:0006511,GO:0007346,GO:0008150,GO:0008152,GO:0009056,GO:0009057,GO:0009987,GO:0010035,GO:0010038,GO:0016567,GO:0019005,GO:0019538,GO:0019941,GO:0030163,GO:0031461,GO:0032446,GO:0032991,GO:0036211,GO:0042221,GO:0042787,GO:0043170,GO:0043226,GO:0043227,GO:0043229,GO:0043231,GO:0043234,GO:0043412,GO:0043632,GO:0044237,GO:…	NA	K10259,K10260	K	Transcription	PF00400
pdam_00000591	-0.0356922	0.278517	0.917861	0.959076	0.60505	0.00543108	NA	NA	Upregulated	FOXJ1	foxj1b: Forkhead box protein J1-B (Danio rerio)	GO:0003700, GO:0006355, GO:0043565	GO:0000003,GO:0000084,GO:0000115,GO:0000122,GO:0000226,GO:0000228,GO:0000278,GO:0000785,GO:0000790,GO:0000902,GO:0000904,GO:0000975,GO:0000976,GO:0000977,GO:0000978,GO:0000981,GO:0000982,GO:0000987,GO:0001012,GO:0001067,GO:0001071,GO:0001077,GO:0001159,GO:0001228,GO:0001655,GO:0001656,GO:0001657,GO:0001708,GO:0001817,GO:0001822,GO:0001947,GO:0002009,GO:0002052,GO:0002064,GO:0002093,GO:0002376,GO:…	K09402	K09402,K09403,K09413	K	Transcription	PF00250
pdam_00000592	0.226266	0.238852	0.665543	0.312347	0.264096	1.0513e-05	NA	NA	Upregulated	FAM82B	RMDN1: Regulator of microtubule dynamics protein 1 (Homo sapiens)	GO:0005515	GO:0000003,GO:0000922,GO:0005575,GO:0005622,GO:0005623,GO:0005737,GO:0005739,GO:0005813,GO:0005815,GO:0005819,GO:0005856,GO:0007049,GO:0007059,GO:0007126,GO:0008150,GO:0009987,GO:0015630,GO:0016023,GO:0022402,GO:0030139,GO:0031410,GO:0031982,GO:0031988,GO:0032991,GO:0043226,GO:0043227,GO:0043228,GO:0043229,GO:0043231,GO:0043232,GO:0043234,GO:0044422,GO:0044424,GO:0044430,GO:0044444,GO:0044446,GO:…	NA	NA	NA	NA	NA
pdam_00000593	0.110089	-0.103239	-0.0944306	0.594525	0.616172	0.513405	NA	NA	NA	RRN3	RRN3: RNA polymerase I-specific transcription initiation factor RRN3 (Homo sapiens)	NA	GO:0000003,GO:0000120,GO:0000428,GO:0000988,GO:0000989,GO:0000990,GO:0001042,GO:0001071,GO:0001082,GO:0001167,GO:0001169,GO:0001179,GO:0001180,GO:0001181,GO:0001701,GO:0003674,GO:0003700,GO:0005488,GO:0005515,GO:0005575,GO:0005622,GO:0005623,GO:0005634,GO:0005654,GO:0005667,GO:0005730,GO:0005736,GO:0005737,GO:0005829,GO:0006139,GO:0006351,GO:0006352,GO:0006355,GO:0006356,GO:0006360,GO:0006361,GO:…	K15216	K15216	K	Transcription	PF05327
pdam_00000594	-0.0793267	-0.35629	-0.244993	0.584181	0.00018852	0.00728577	NA	Downregulated	Downregulated	HAGH	HAGH: Hydroxyacylglutathione hydrolase%2C mitochondrial (Gallus gallus)	NA	GO:0000003,GO:0003674,GO:0003824,GO:0004416,GO:0005575,GO:0005622,GO:0005623,GO:0005634,GO:0005737,GO:0005739,GO:0005759,GO:0005829,GO:0005856,GO:0005875,GO:0005975,GO:0005996,GO:0006081,GO:0006082,GO:0006089,GO:0006518,GO:0006520,GO:0006575,GO:0006749,GO:0006750,GO:0006766,GO:0006767,GO:0006790,GO:0006807,GO:0006950,GO:0007276,GO:0007283,GO:0008150,GO:0008152,GO:0008652,GO:0009056,GO:0009058,GO:…	K01069	K01069,K15687,K16912	NA	NA	PF16123
pdam_00000595	0.417564	0.345422	-0.0443806	0.0852669	0.146586	0.843409	NA	NA	NA	USP1	Usp1: Ubiquitin carboxyl-terminal hydrolase 1 (Rattus norvegicus)	GO:0006511, GO:0016579, GO:0036459	GO:0003674,GO:0003824,GO:0004175,GO:0004197,GO:0004221,GO:0004843,GO:0005575,GO:0005622,GO:0005623,GO:0005634,GO:0005654,GO:0006139,GO:0006259,GO:0006281,GO:0006282,GO:0006464,GO:0006725,GO:0006807,GO:0006950,GO:0006974,GO:0008150,GO:0008152,GO:0008233,GO:0008234,GO:0009314,GO:0009411,GO:0009416,GO:0009628,GO:0009987,GO:0016579,GO:0016787,GO:0016788,GO:0016790,GO:0019219,GO:0019222,GO:0019538,GO:…	K11832	K11832	L	Replication, recombination and repair	PF00443
pdam_00000596	0.0998189	0.0139445	-0.119297	0.811597	0.979766	0.65384	NA	NA	NA	POLD2	POLD2: DNA polymerase delta subunit 2 (Homo sapiens)	GO:0003677, GO:0003887, GO:0006260	GO:0000003,GO:0000084,GO:0000226,GO:0000228,GO:0000278,GO:0000722,GO:0000723,GO:0000731,GO:0003006,GO:0003674,GO:0003824,GO:0003887,GO:0005575,GO:0005622,GO:0005623,GO:0005634,GO:0005654,GO:0005657,GO:0005694,GO:0005737,GO:0005829,GO:0005856,GO:0005875,GO:0006139,GO:0006259,GO:0006260,GO:0006261,GO:0006271,GO:0006272,GO:0006273,GO:0006278,GO:0006281,GO:0006283,GO:0006284,GO:0006289,GO:0006297,GO:…	K02328	K02328	L	Replication, recombination and repair	PF04042
pdam_00000597	0.15246	0.148764	-0.0018661	0.58374	0.592325	0.992978	NA	NA	NA	NA	KLHL5: Kelch-like protein 5 (Homo sapiens)	GO:0005515	NA	NA	NA	T	Signal transduction mechanisms	PF00651, PF01344, PF077071
pdam_00000598	-0.230271	0.172168	0.00594381	0.191772	0.340687	0.970224	NA	NA	NA	MAP2K6	MAP2K6: Dual specificity mitogen-activated protein kinase kinase 6 (Homo sapiens)	GO:0004672, GO:0005524, GO:0006468	GO:0000003,GO:0000165,GO:0000187,GO:0000578,GO:0001817,GO:0001932,GO:0001934,GO:0002218,GO:0002221,GO:0002224,GO:0002251,GO:0002253,GO:0002376,GO:0002385,GO:0002682,GO:0002684,GO:0002753,GO:0002755,GO:0002756,GO:0002757,GO:0002758,GO:0002764,GO:0003002,GO:0003006,GO:0003008,GO:0003012,GO:0003013,GO:0003015,GO:0003674,GO:0003824,GO:0004672,GO:0004674,GO:0004702,GO:0004708,GO:0004712,GO:0004871,GO:…	K04433	K04430,K04432,K04433	T	Signal transduction mechanisms	PF00069
pdam_00000599	0.349769	0.0065791	0.553774	0.12256	0.988054	0.000657573	NA	NA	Upregulated	GSTU1	Probable glutathione S-transferase (Nicotiana tabacum)	GO:0004364, GO:0005515, GO:0005737, GO:0008152	GO:0003674,GO:0003824,GO:0004364,GO:0005488,GO:0005575,GO:0005576,GO:0005622,GO:0005623,GO:0005634,GO:0005737,GO:0005773,GO:0005774,GO:0005829,GO:0005886,GO:0005911,GO:0006082,GO:0006518,GO:0006520,GO:0006575,GO:0006749,GO:0006790,GO:0006807,GO:0006950,GO:0006970,GO:0006979,GO:0007154,GO:0007275,GO:0008150,GO:0008152,GO:0009056,GO:0009266,GO:0009314,GO:0009404,GO:0009407,GO:0009409,GO:0009414,GO:…	K00799	K00799	O	Posttranslational modification, protein turnover, chaperones	PF13409
pdam_00000602	-0.230359	-0.420507	-0.212692	0.589943	NA	0.472231	NA	NA	NA	NA	unknown function	NA	NA	NA	NA	NA	NA	PF08378
pdam_00000603	0.143393	0.0444305	0.137865	0.234183	0.771625	0.119658	NA	NA	NA	BFAR	Bfar: Bifunctional apoptosis regulator (Rattus norvegicus)	GO:0005515, GO:0046872	GO:0003674,GO:0005198,GO:0005575,GO:0005622,GO:0005623,GO:0005737,GO:0005783,GO:0005789,GO:0005886,GO:0005887,GO:0008150,GO:0010941,GO:0012505,GO:0016020,GO:0016021,GO:0031090,GO:0031224,GO:0031226,GO:0042175,GO:0042981,GO:0043066,GO:0043067,GO:0043069,GO:0043226,GO:0043227,GO:0043229,GO:0043231,GO:0044422,GO:0044424,GO:0044425,GO:0044432,GO:0044444,GO:0044446,GO:0044459,GO:0044464,GO:0048519,GO:…	K15684	K09506,K15684	O	Posttranslational modification, protein turnover, chaperones	PF00097, PF07647
pdam_00000604	-0.00321509	-0.0670279	-0.0951599	0.987109	0.666352	0.359417	NA	NA	NA	LRRC47	Lrrc47: Leucine-rich repeat-containing protein 47 (Mus musculus)	GO:0003723, GO:0004826, GO:0005515	NA	NA	NA	J	Translation, ribosomal structure and biogenesis	PF03483, PF13855
pdam_00000605	-0.290257	0.271673	0.192173	0.310275	0.304915	0.358587	NA	NA	NA	DNAJC22	Dnajc22: DnaJ homolog subfamily C member 22 (Rattus norvegicus)	NA	GO:0005575,GO:0005622,GO:0005623,GO:0005737,GO:0005768,GO:0005769,GO:0005886,GO:0006810,GO:0006897,GO:0007275,GO:0007424,GO:0008150,GO:0009987,GO:0016020,GO:0016043,GO:0016192,GO:0030198,GO:0031410,GO:0031982,GO:0032501,GO:0032502,GO:0035002,GO:0035150,GO:0035151,GO:0035152,GO:0035159,GO:0042044,GO:0042045,GO:0043062,GO:0043226,GO:0043227,GO:0043229,GO:0043231,GO:0044424,GO:0044444,GO:0044464,GO:…	K19370	K09510,K09518,K19370	O	Posttranslational modification, protein turnover, chaperones	PF00226
pdam_00000606	-0.126312	0.0374944	-0.14138	0.664886	NA	0.46812	NA	NA	NA	PEX12	PEX12: Peroxisome assembly protein 12 (Cricetulus longicaudatus)	GO:0005779, GO:0006625, GO:0008022, GO:0008270	GO:0000003,GO:0002064,GO:0002119,GO:0002164,GO:0003006,GO:0003674,GO:0003824,GO:0004842,GO:0005488,GO:0005515,GO:0005575,GO:0005622,GO:0005623,GO:0005737,GO:0005777,GO:0005778,GO:0005779,GO:0006082,GO:0006464,GO:0006605,GO:0006625,GO:0006629,GO:0006631,GO:0006635,GO:0006810,GO:0006886,GO:0006996,GO:0007031,GO:0007275,GO:0007276,GO:0007281,GO:0007283,GO:0007286,GO:0008104,GO:0008150,GO:0008152,GO:…	K13345	K06653,K13345	O	Posttranslational modification, protein turnover, chaperones	PF04757
pdam_00000607	-0.111994	-0.220723	-0.099729	0.729362	0.422928	0.640033	NA	NA	NA	NA	dnajc27: DnaJ homolog subfamily C member 27 (Danio rerio)	GO:0003924, GO:0005525	GO:0005575,GO:0005623,GO:0005886,GO:0016020,GO:0044464,GO:0071944	NA	K07877,K19372	U	Intracellular trafficking, secretion, and vesicular transport	PF00071
pdam_00000608	0.140506	0.0802564	0.0140675	0.507986	0.739111	0.935171	NA	NA	NA	FAM133B	FAM133B: Protein FAM133B (Homo sapiens)	NA	NA	NA	NA	NA	NA	NA
pdam_00000609	0.255852	-0.163034	1.13457	0.707374	0.830129	0.0039984	NA	NA	Upregulated	HSPA8	Hspa8: Heat shock cognate 71 kDa protein (Rattus norvegicus)	GO:0005515	GO:0000003,GO:0000166,GO:0000228,GO:0000375,GO:0000377,GO:0000398,GO:0000785,GO:0000790,GO:0000902,GO:0000904,GO:0000974,GO:0001505,GO:0001700,GO:0001882,GO:0001883,GO:0002119,GO:0002164,GO:0003001,GO:0003008,GO:0003674,GO:0003824,GO:0005488,GO:0005515,GO:0005524,GO:0005575,GO:0005576,GO:0005622,GO:0005623,GO:0005634,GO:0005681,GO:0005694,GO:0005726,GO:0005730,GO:0005737,GO:0005739,GO:0005811,GO:…	K03283	K03283,K09490	O	Posttranslational modification, protein turnover, chaperones	PF00012, PF000180
pdam_00000612	0.339404	0.221528	0.755525	0.0178413	0.138499	6.01609e-12	Upregulated	NA	Upregulated	NA	btrR: L-glutamine:2-deoxy-scyllo-inosose aminotransferase (Bacillus circulans)	GO:0003824	NA	K13010	NA	E	Amino acid transport and metabolism	PF01041
pdam_00000613	0.080597	-0.167844	-0.174656	0.7793	0.510476	0.32733	NA	NA	NA	CCDC108	CFAP65: Cilia- and flagella-associated protein 65 (Gallus gallus)	NA	GO:0005575,GO:0016020	NA	NA	NA	NA	NA
pdam_00000616	0.0375842	0.0822938	0.33082	0.874307	0.690326	0.00705088	NA	NA	Upregulated	TMX2	tmx2b: Thioredoxin-related transmembrane protein 2-B (Danio rerio)	GO:0045454	GO:0005575,GO:0016020	NA	NA	O	Posttranslational modification, protein turnover, chaperones	PF00085
pdam_00000618	-0.0103582	-0.16198	0.272079	0.978787	0.587832	0.161127	NA	NA	NA	FG09103.1	SPCC1494.01: UPF0676 protein C1494.01 (Schizosaccharomyces pombe (strain 972 / ATCC 24843))	GO:0016491, GO:0055114	GO:0003674,GO:0003824,GO:0005575,GO:0005622,GO:0005623,GO:0005634,GO:0005737,GO:0005829,GO:0008150,GO:0008152,GO:0016491,GO:0016705,GO:0016706,GO:0043226,GO:0043227,GO:0043229,GO:0043231,GO:0044424,GO:0044444,GO:0044464,GO:0044710,GO:0045544,GO:0051213,GO:0055114	NA	K04125	Q	Secondary metabolites biosynthesis, transport and catabolism	PF03171, PF14226
pdam_00000619	0.0331542	0.0642584	0.945517	0.962199	0.927915	0.00478881	NA	NA	Upregulated	NA	KIF13B: Kinesin-like protein KIF13B (Homo sapiens)	NA	NA	NA	NA	NA	NA	PF01302
pdam_00000620	-0.114711	0.0113812	0.0591101	0.525519	0.966712	0.651533	NA	NA	NA	NA	eif2a: Eukaryotic translation initiation factor 2A (Dictyostelium discoideum)	NA	NA	NA	NA	NA	NA	NA
pdam_00000621	0.178685	0.0774167	0.205553	0.713801	0.891608	0.514306	NA	NA	NA	NA	notch1: Neurogenic locus notch homolog protein 1 (Xenopus laevis)	GO:0004252, GO:0005509, GO:0006508	NA	NA	K02599,K10104	NA	NA	PF00008
pdam_00000622	-0.0908315	0.230921	0.437409	0.800513	0.443658	0.0316381	NA	NA	Upregulated	TUB1	Tuba1a: Tubulin alpha-1A chain (Rattus norvegicus)	GO:0003924, GO:0005200, GO:0005525, GO:0005874, GO:0007017	GO:0000003,GO:0000070,GO:0000226,GO:0000235,GO:0000278,GO:0000280,GO:0000743,GO:0000746,GO:0000747,GO:0000819,GO:0000922,GO:0003674,GO:0005198,GO:0005200,GO:0005575,GO:0005622,GO:0005623,GO:0005634,GO:0005737,GO:0005815,GO:0005816,GO:0005818,GO:0005819,GO:0005827,GO:0005828,GO:0005829,GO:0005856,GO:0005874,GO:0005876,GO:0005880,GO:0005881,GO:0006810,GO:0006928,GO:0006996,GO:0007005,GO:0007010,GO:…	K07374	K07374	Z	Cytoskeleton	PF00091, PF03953
pdam_00000623	-0.0547101	0.186688	0.244126	0.843834	0.39374	0.115041	NA	NA	NA	TUB1	Tuba1a: Tubulin alpha-1A chain (Rattus norvegicus)	GO:0003924, GO:0005200, GO:0005525, GO:0005874, GO:0007017	GO:0000003,GO:0000070,GO:0000075,GO:0000166,GO:0000226,GO:0000235,GO:0000278,GO:0000280,GO:0000743,GO:0000746,GO:0000747,GO:0000819,GO:0000922,GO:0001882,GO:0001883,GO:0001966,GO:0003674,GO:0005198,GO:0005200,GO:0005488,GO:0005525,GO:0005575,GO:0005622,GO:0005623,GO:0005634,GO:0005737,GO:0005815,GO:0005816,GO:0005818,GO:0005819,GO:0005827,GO:0005828,GO:0005829,GO:0005856,GO:0005874,GO:0005876,GO:…	K07374	K07374	Z	Cytoskeleton	PF00091, PF03953
pdam_00000624	-0.265466	0.0103242	0.041663	0.312381	0.980595	0.845275	NA	NA	NA	NA	Npffr2: Neuropeptide FF receptor 2 (Rattus norvegicus)	GO:0004930, GO:0007186, GO:0016021	GO:0005575,GO:0005623,GO:0005886,GO:0016020,GO:0044464,GO:0071944	NA	NA	T	Signal transduction mechanisms	PF00001
pdam_00000625	-0.693472	-0.912757	-2.75551	0.152685	0.0318261	3.88166e-15	NA	Downregulated	Downregulated	NA	GALT3: Hydroxyproline O-galactosyltransferase GALT3 (Arabidopsis thaliana)	GO:0006486, GO:0008378, GO:0016020	NA	NA	NA	NA	NA	PF01762
pdam_00000626	0.131435	0.283595	0.365606	0.525476	0.0856263	0.00539931	NA	NA	Upregulated	ZNF330	Znf330: Zinc finger protein 330 (Mus musculus)	GO:0004930, GO:0005634, GO:0007186, GO:0008270, GO:0016021	GO:0000775,GO:0003674,GO:0005488,GO:0005575,GO:0005622,GO:0005623,GO:0005634,GO:0005694,GO:0005730,GO:0030496,GO:0031974,GO:0031981,GO:0043167,GO:0043169,GO:0043226,GO:0043227,GO:0043228,GO:0043229,GO:0043231,GO:0043232,GO:0043233,GO:0044422,GO:0044424,GO:0044427,GO:0044428,GO:0044446,GO:0044464,GO:0046872,GO:0070013	NA	NA	NA	NA	PF00001, PF06524
pdam_00000628	-0.0100509	0.0366112	0.220493	0.977578	0.918178	0.223468	NA	NA	NA	C5ORF48	TEX43: Testis-expressed protein 43 (Bos taurus)	NA	NA	NA	NA	NA	NA	PF14983
pdam_00000629	-0.286851	-0.0334658	-0.229135	0.220216	0.919172	0.189047	NA	NA	NA	NA	opn4b: Melanopsin-B (Xenopus laevis)	GO:0004930, GO:0007186, GO:0007601, GO:0016021	GO:0003674,GO:0004871,GO:0004872,GO:0007154,GO:0007165,GO:0008150,GO:0009881,GO:0009987,GO:0023052,GO:0038023,GO:0044699,GO:0044700,GO:0044763,GO:0050789,GO:0050794,GO:0050896,GO:0051716,GO:0060089,GO:0065007	K04255	K04256	T	Signal transduction mechanisms	PF00001
pdam_00000630	0.216	0.00854601	0.201142	0.078125	0.970014	0.0328763	NA	NA	Upregulated	CNPPD1	CNPPD1: Protein CNPPD1 (Gallus gallus)	GO:0000079, GO:0019901	GO:0000003,GO:0000079,GO:0000080,GO:0000082,GO:0000083,GO:0000131,GO:0000278,GO:0000307,GO:0000910,GO:0000911,GO:0000912,GO:0000914,GO:0000920,GO:0001932,GO:0003674,GO:0005575,GO:0005622,GO:0005623,GO:0005634,GO:0005737,GO:0005856,GO:0005875,GO:0005933,GO:0005934,GO:0005935,GO:0006355,GO:0006357,GO:0006950,GO:0006996,GO:0007010,GO:0007049,GO:0007089,GO:0007108,GO:0007154,GO:0007165,GO:0007346,GO:…	NA	K06656,K06657,K18636	NA	NA	PF08613
pdam_00000631	0.204621	-0.074591	0.140886	0.469816	0.833863	0.493724	NA	NA	NA	SIPA1L2	SIPA1L1: Signal-induced proliferation-associated 1-like protein 1 (Homo sapiens)	GO:0005096, GO:0005515, GO:0031532, GO:0043087, GO:0048814, GO:0051056	GO:0001558,GO:0003674,GO:0003779,GO:0005083,GO:0005096,GO:0005099,GO:0005488,GO:0005515,GO:0005575,GO:0005622,GO:0005623,GO:0005634,GO:0005737,GO:0005829,GO:0005856,GO:0006140,GO:0006950,GO:0006996,GO:0007010,GO:0007154,GO:0007162,GO:0007165,GO:0007166,GO:0007167,GO:0007169,GO:0007275,GO:0007399,GO:0008047,GO:0008092,GO:0008150,GO:0008283,GO:0009118,GO:0009414,GO:0009415,GO:0009605,GO:0009628,GO:…	K17701	K08013,K17701,K17702,K17703	T	Signal transduction mechanisms	PF021457
pdam_00000632	-0.357024	0.0189531	-0.422349	0.0123611	0.939298	0.000251485	Downregulated	NA	Downregulated	NA	KCNF1: Potassium voltage-gated channel subfamily F member 1 (Homo sapiens)	GO:0004970, GO:0005249, GO:0006813, GO:0008076, GO:0016020	NA	NA	NA	P	Inorganic ion transport and metabolism	PF00060, PF07885
pdam_00000635	-0.14874	0.0449037	0.538817	0.823075	0.95728	0.156679	NA	NA	NA	NA	unknown function	NA	NA	NA	NA	NA	NA	NA
pdam_00000636	-0.0276998	0.464887	0.0931832	0.954741	0.121826	0.732351	NA	NA	NA	WNT10A	wnt10a: Protein Wnt-10a (Danio rerio)	GO:0005102, GO:0005576, GO:0007275, GO:0016055	GO:0000003,GO:0000086,GO:0000122,GO:0000278,GO:0001501,GO:0001654,GO:0001664,GO:0001736,GO:0001737,GO:0001738,GO:0001745,GO:0001942,GO:0002009,GO:0002062,GO:0002165,GO:0002376,GO:0002520,GO:0003002,GO:0003006,GO:0003008,GO:0003674,GO:0005102,GO:0005109,GO:0005488,GO:0005515,GO:0005575,GO:0005576,GO:0005578,GO:0005615,GO:0005623,GO:0005886,GO:0006355,GO:0006357,GO:0006629,GO:0006950,GO:0007049,GO:…	K01357	K01357	T	Signal transduction mechanisms	PF00110
pdam_00000637	0.211812	-0.517883	-1.6777	0.494025	0.0365395	5.96878e-16	NA	Downregulated	Downregulated	WNT6	Wnt6: Protein Wnt-6 (Mus musculus)	GO:0005102, GO:0005576, GO:0007275, GO:0016055	GO:0000122,GO:0001654,GO:0001655,GO:0001657,GO:0001658,GO:0001664,GO:0001763,GO:0001822,GO:0001838,GO:0002009,GO:0003002,GO:0003674,GO:0005102,GO:0005109,GO:0005488,GO:0005515,GO:0005575,GO:0005576,GO:0005578,GO:0005615,GO:0005623,GO:0005886,GO:0006355,GO:0006357,GO:0007154,GO:0007165,GO:0007166,GO:0007267,GO:0007275,GO:0007389,GO:0007399,GO:0007423,GO:0008150,GO:0009653,GO:0009790,GO:0009798,GO:…	K00445	K00445	T	Signal transduction mechanisms	PF00110
pdam_00000638	0.0827296	0.571945	0.865403	0.897463	0.178932	0.0073119	NA	NA	Upregulated	WNT1	WNT-1: Protein Wnt-1 (Ambystoma mexicanum)	GO:0005102, GO:0005576, GO:0007275, GO:0016055	GO:0000003,GO:0000122,GO:0000578,GO:0000768,GO:0000902,GO:0000975,GO:0001067,GO:0001654,GO:0001655,GO:0001657,GO:0001658,GO:0001664,GO:0001700,GO:0001708,GO:0001709,GO:0001736,GO:0001738,GO:0001745,GO:0001763,GO:0001775,GO:0001822,GO:0001838,GO:0001889,GO:0001932,GO:0001934,GO:0002009,GO:0002164,GO:0002165,GO:0002168,GO:0002376,GO:0002520,GO:0002521,GO:0002682,GO:0002683,GO:0002684,GO:0003002,GO:…	K03209	K00408,K00444,K01558,K03209	T	Signal transduction mechanisms	PF00110
pdam_00000640	0.490443	0.106746	0.803985	0.177858	0.832151	0.00193196	NA	NA	Upregulated	ZFP106	ZNF106: Zinc finger protein 106 (Homo sapiens)	GO:0003676, GO:0005515	GO:0003674,GO:0005488,GO:0005515,GO:0005575,GO:0005622,GO:0005623,GO:0005634,GO:0005730,GO:0005737,GO:0005829,GO:0007154,GO:0007165,GO:0007166,GO:0007167,GO:0007169,GO:0008150,GO:0008286,GO:0009719,GO:0009725,GO:0009987,GO:0010033,GO:0010243,GO:0016020,GO:0017124,GO:0019904,GO:0023052,GO:0031974,GO:0031981,GO:0032868,GO:0032869,GO:0032870,GO:0042221,GO:0043226,GO:0043227,GO:0043228,GO:0043229,GO:…	NA	NA	NA	NA	PF00400
pdam_00000645	-0.393181	-0.337172	-0.654744	0.13915	0.185319	0.000746368	NA	NA	Downregulated	GSC	Gsc: Homeobox protein goosecoid (Drosophila melanogaster)	GO:0003677	GO:0000122,GO:0000981,GO:0000982,GO:0001071,GO:0001078,GO:0001085,GO:0001103,GO:0001227,GO:0001501,GO:0003002,GO:0003674,GO:0003676,GO:0003677,GO:0003700,GO:0005488,GO:0005515,GO:0005575,GO:0005622,GO:0005623,GO:0005634,GO:0005654,GO:0005667,GO:0006139,GO:0006351,GO:0006355,GO:0006357,GO:0006366,GO:0006725,GO:0006807,GO:0007154,GO:0007165,GO:0007275,GO:0007369,GO:0007389,GO:0007399,GO:0007417,GO:…	K09324	K09324	K	Transcription	PF00046
pdam_00000646	-0.0917942	-0.052822	0.0628262	0.651332	0.815321	0.650485	NA	NA	NA	PHF10	phf10: PHD finger protein 10 (Xenopus laevis)	NA	GO:0000003,GO:0000785,GO:0000791,GO:0000792,GO:0002165,GO:0003674,GO:0003682,GO:0005488,GO:0005575,GO:0005622,GO:0005623,GO:0005634,GO:0005694,GO:0005700,GO:0006355,GO:0007275,GO:0007276,GO:0007292,GO:0007399,GO:0007444,GO:0007478,GO:0007480,GO:0007552,GO:0007560,GO:0008150,GO:0009653,GO:0009791,GO:0009886,GO:0009887,GO:0009889,GO:0009890,GO:0009891,GO:0009892,GO:0009893,GO:0009966,GO:0009967,GO:…	K22197	NA	NA	NA	PF00628
pdam_00000647	-0.412945	-0.542642	-0.348897	0.368991	0.188631	0.297367	NA	NA	NA	OTX	otx2-a: Homeobox protein OTX2-A (Xenopus laevis)	GO:0003677, GO:0006355, GO:0043565	GO:0000122,GO:0000578,GO:0000981,GO:0000982,GO:0001071,GO:0001077,GO:0001228,GO:0001654,GO:0001700,GO:0001745,GO:0001751,GO:0001754,GO:0002165,GO:0003002,GO:0003674,GO:0003700,GO:0005488,GO:0005515,GO:0005575,GO:0005622,GO:0005623,GO:0005634,GO:0006139,GO:0006351,GO:0006355,GO:0006357,GO:0006366,GO:0006725,GO:0006807,GO:0006996,GO:0007275,GO:0007350,GO:0007351,GO:0007354,GO:0007355,GO:0007389,GO:…	K09326	K09326,K18490	K	Transcription	PF00046
pdam_00000648	-0.0863085	-0.309456	-0.909288	0.853557	0.396858	0.000212938	NA	NA	Downregulated	OTX	otx5-b: Homeobox protein otx5-B (Xenopus laevis)	GO:0003677, GO:0006355, GO:0043565	GO:0000122,GO:0000228,GO:0000578,GO:0000723,GO:0000781,GO:0000784,GO:0000981,GO:0000982,GO:0001071,GO:0001077,GO:0001228,GO:0001654,GO:0001700,GO:0001708,GO:0001745,GO:0001751,GO:0001754,GO:0002165,GO:0003002,GO:0003008,GO:0003674,GO:0003676,GO:0003677,GO:0003700,GO:0005488,GO:0005515,GO:0005575,GO:0005622,GO:0005623,GO:0005634,GO:0005694,GO:0006139,GO:0006259,GO:0006351,GO:0006355,GO:0006357,GO:…	K18490	K09326,K18490	K	Transcription	PF00046
pdam_00000649	-0.151313	-0.197496	-0.0241234	0.736586	0.643342	0.93986	NA	NA	NA	OTX	otx1b: Homeobox protein OTX1 B (Danio rerio)	GO:0003677, GO:0006355, GO:0043565	GO:0000122,GO:0000228,GO:0000578,GO:0000723,GO:0000781,GO:0000784,GO:0000981,GO:0000982,GO:0001071,GO:0001077,GO:0001228,GO:0001654,GO:0001700,GO:0001708,GO:0001745,GO:0001751,GO:0001754,GO:0002165,GO:0003002,GO:0003008,GO:0003674,GO:0003676,GO:0003677,GO:0003700,GO:0005488,GO:0005515,GO:0005575,GO:0005622,GO:0005623,GO:0005634,GO:0005694,GO:0006139,GO:0006259,GO:0006351,GO:0006355,GO:0006357,GO:…	K09326	K09326,K18490	K	Transcription	PF00046
pdam_00000650	-0.00452506	-0.13007	-0.121297	0.995176	0.837018	0.751035	NA	NA	NA	NA	OTX1: Homeobox protein OTX1 (Homo sapiens)	GO:0003677, GO:0006355, GO:0043565	GO:0000902,GO:0000904,GO:0001071,GO:0001558,GO:0003674,GO:0003700,GO:0005488,GO:0005515,GO:0005575,GO:0005622,GO:0005623,GO:0005634,GO:0006355,GO:0006928,GO:0006935,GO:0007275,GO:0007399,GO:0007409,GO:0007411,GO:0008150,GO:0008361,GO:0009605,GO:0009653,GO:0009889,GO:0009987,GO:0010468,GO:0010556,GO:0010769,GO:0010975,GO:0016043,GO:0019219,GO:0019222,GO:0022008,GO:0022603,GO:0022604,GO:0030030,GO:…	K09326	K09330,K18490	K	Transcription	PF00046
pdam_00000651	-0.212192	-0.141734	-0.472524	0.505691	0.681791	0.0239046	NA	NA	Downregulated	VAC8	Armc4: Armadillo repeat-containing protein 4 (Mus musculus)	GO:0005488, GO:0005515	GO:0000011,GO:0000139,GO:0000322,GO:0000323,GO:0000324,GO:0000329,GO:0003674,GO:0005488,GO:0005515,GO:0005575,GO:0005622,GO:0005623,GO:0005737,GO:0005773,GO:0005774,GO:0005794,GO:0006605,GO:0006623,GO:0006810,GO:0006886,GO:0006914,GO:0006944,GO:0006950,GO:0006996,GO:0007033,GO:0007034,GO:0007154,GO:0008104,GO:0008150,GO:0008152,GO:0009056,GO:0009267,GO:0009605,GO:0009987,GO:0009991,GO:0010324,GO:…	K24125	K08332	U	Intracellular trafficking, secretion, and vesicular transport	PF00514
pdam_00000652	-0.00100995	-0.0821994	-0.21307	0.997484	0.844138	0.374626	NA	NA	NA	FBXO11	dre-1: F-box protein dre-1 (Caenorhabditis elegans)	NA	GO:0000003,GO:0000151,GO:0001667,GO:0001704,GO:0001707,GO:0002009,GO:0002119,GO:0002164,GO:0003006,GO:0003008,GO:0003674,GO:0003824,GO:0004842,GO:0005488,GO:0005515,GO:0005575,GO:0005622,GO:0005623,GO:0005634,GO:0005730,GO:0005737,GO:0006342,GO:0006355,GO:0006464,GO:0006479,GO:0006508,GO:0006511,GO:0006928,GO:0007275,GO:0007369,GO:0007498,GO:0007509,GO:0007548,GO:0007600,GO:0007605,GO:0007610,GO:…	NA	K10297	NA	NA	PF13229
pdam_00000654	0.178238	0.116742	0.0414902	0.215856	0.438017	0.728923	NA	NA	NA	NA	Zfp26: Zinc finger protein 26 (Mus musculus)	GO:0003676	NA	NA	NA	NA	NA	PF00096
pdam_00000656	-0.191658	0.162135	-0.0929162	0.541632	0.599582	0.685328	NA	NA	NA	NA	unknown function	NA	NA	NA	NA	NA	NA	NA
pdam_00000657	-0.21465	-0.194604	-0.381899	0.492973	0.541892	0.0689761	NA	NA	NA	TNS4	TNS3: Tensin-3 (Homo sapiens)	GO:0005515	GO:0002165,GO:0003674,GO:0003779,GO:0005488,GO:0005515,GO:0005575,GO:0005622,GO:0005623,GO:0005737,GO:0005912,GO:0005924,GO:0005925,GO:0006996,GO:0007010,GO:0007016,GO:0007275,GO:0007444,GO:0007472,GO:0007475,GO:0007476,GO:0007552,GO:0007560,GO:0008092,GO:0008104,GO:0008150,GO:0008587,GO:0009653,GO:0009791,GO:0009886,GO:0009887,GO:0009987,GO:0016043,GO:0030016,GO:0030017,GO:0030054,GO:0030055,GO:…	K18080	K00106,K18080	NA	NA	PF00017, PF08416
pdam_00000658	0.180142	-0.120292	-0.263183	0.506883	0.684183	0.155692	NA	NA	NA	TNS3	TNS1: Tensin-1 (Homo sapiens)	GO:0003676, GO:0004725, GO:0006470, GO:0016311, GO:0035556	GO:0001655,GO:0001667,GO:0001822,GO:0003674,GO:0003779,GO:0005488,GO:0005515,GO:0005575,GO:0005622,GO:0005623,GO:0005856,GO:0005886,GO:0005912,GO:0005924,GO:0005925,GO:0006928,GO:0007044,GO:0007275,GO:0008092,GO:0008150,GO:0008152,GO:0008284,GO:0008285,GO:0009987,GO:0010761,GO:0014823,GO:0014850,GO:0016020,GO:0016043,GO:0016477,GO:0019725,GO:0022607,GO:0030054,GO:0030055,GO:0030323,GO:0030324,GO:…	K18080	K01110,K18080	T	Signal transduction mechanisms	PF00102, PF10409
pdam_00000659	0.544811	0.409546	2.00186	0.18146	0.325273	1.2184e-12	NA	NA	Upregulated	NA	Cathepsin L (Sarcophaga peregrina)	GO:0006508, GO:0008234	GO:0000323,GO:0002165,GO:0003674,GO:0003824,GO:0004175,GO:0004197,GO:0005575,GO:0005622,GO:0005623,GO:0005737,GO:0005764,GO:0005773,GO:0007275,GO:0007431,GO:0007435,GO:0007552,GO:0007559,GO:0008150,GO:0008152,GO:0008219,GO:0008233,GO:0008234,GO:0009056,GO:0009057,GO:0009653,GO:0009790,GO:0009791,GO:0009792,GO:0009886,GO:0009888,GO:0009987,GO:0012501,GO:0016265,GO:0016271,GO:0016787,GO:0019538,GO:…	K01365	K01365,K15621	O	Posttranslational modification, protein turnover, chaperones	PF00112, PF08246
pdam_00000660	0.0494218	0.129511	0.820199	0.862582	0.594625	1.73907e-08	NA	NA	Upregulated	NA	Cathepsin L (Sarcophaga peregrina)	GO:0006508, GO:0008234	GO:0000323,GO:0002165,GO:0003674,GO:0003824,GO:0004175,GO:0004197,GO:0005575,GO:0005622,GO:0005623,GO:0005737,GO:0005764,GO:0005773,GO:0007275,GO:0007431,GO:0007435,GO:0007552,GO:0007559,GO:0008150,GO:0008152,GO:0008219,GO:0008233,GO:0008234,GO:0009056,GO:0009057,GO:0009653,GO:0009791,GO:0009886,GO:0009888,GO:0009987,GO:0012501,GO:0016265,GO:0016271,GO:0016787,GO:0019538,GO:0022612,GO:0030163,GO:…	NA	K01365	O	Posttranslational modification, protein turnover, chaperones	PF00112, PF08246
pdam_00000664	0.0388992	0.152054	0.680182	0.910137	0.601201	0.000111102	NA	NA	Upregulated	PSMB3	psmb3: Proteasome subunit beta type-3 (Oncorhynchus mykiss)	GO:0004175, GO:0004298, GO:0005839, GO:0019774, GO:0043161, GO:0051603	GO:0000003,GO:0000075,GO:0000077,GO:0000082,GO:0000084,GO:0000209,GO:0000278,GO:0000502,GO:0002119,GO:0002164,GO:0002376,GO:0002474,GO:0002478,GO:0002479,GO:0003674,GO:0003824,GO:0004175,GO:0005488,GO:0005515,GO:0005575,GO:0005622,GO:0005623,GO:0005634,GO:0005654,GO:0005737,GO:0005773,GO:0005774,GO:0005783,GO:0005789,GO:0005829,GO:0005839,GO:0006139,GO:0006464,GO:0006508,GO:0006511,GO:0006521,GO:…	K02735	K02735	O	Posttranslational modification, protein turnover, chaperones	PF00227
pdam_00000665	-0.126619	0.00567241	0.278739	0.602718	0.988156	0.0670222	NA	NA	NA	TMEM50A	TMEM50A: Transmembrane protein 50A (Homo sapiens)	NA	GO:0000322,GO:0000323,GO:0000324,GO:0000329,GO:0003674,GO:0003824,GO:0004553,GO:0004563,GO:0005575,GO:0005622,GO:0005623,GO:0005737,GO:0005739,GO:0005768,GO:0005773,GO:0005774,GO:0005783,GO:0005794,GO:0005886,GO:0006605,GO:0006623,GO:0006810,GO:0006886,GO:0007034,GO:0008104,GO:0008150,GO:0008152,GO:0009987,GO:0010008,GO:0015031,GO:0015929,GO:0016020,GO:0016021,GO:0016197,GO:0016482,GO:0016787,GO:…	NA	NA	NA	NA	PF05255
pdam_00000666	0.179046	-0.0303502	-0.0238157	0.170353	0.870624	0.831309	NA	NA	NA	NA	sconB: Probable E3 ubiquitin ligase complex SCF subunit sconB (Arthroderma otae (strain ATCC MYA-4605 / CBS 113480))	GO:0005515	NA	NA	K10259,K10260	NA	NA	PF00400, PF00646
pdam_00000667	0.363046	0.362628	-0.156159	0.250807	0.226678	0.535302	NA	NA	NA	NA	SLC16A10: Monocarboxylate transporter 10 (Homo sapiens)	GO:0016021, GO:0055085	NA	NA	NA	G	Carbohydrate transport and metabolism	PF076903
pdam_00000668	0.105035	-0.0455849	-0.396897	0.763583	0.911761	0.052357	NA	NA	NA	GLY-2	Mgat5: Alpha-1%2C6-mannosylglycoprotein 6-beta-N-acetylglucosaminyltransferase A (Rattus norvegicus)	GO:0006487, GO:0030144	GO:0003674,GO:0003824,GO:0005488,GO:0005515,GO:0005516,GO:0005575,GO:0005622,GO:0005623,GO:0005634,GO:0005737,GO:0005794,GO:0005795,GO:0005975,GO:0006464,GO:0006486,GO:0006487,GO:0007275,GO:0008150,GO:0008152,GO:0009058,GO:0009059,GO:0009100,GO:0009101,GO:0009790,GO:0009792,GO:0009987,GO:0016740,GO:0016757,GO:0016758,GO:0019538,GO:0032501,GO:0032502,GO:0034645,GO:0036211,GO:0043170,GO:0043226,GO:…	K00744	K00744,K09661	G	Carbohydrate transport and metabolism	PF15024, PF15027
pdam_00000670	-0.00807778	0.309685	0.619364	0.981364	0.155955	0.000166781	NA	NA	Upregulated	NA	B3galt6: Beta-1%2C3-galactosyltransferase 6 (Mus musculus)	GO:0006486, GO:0008378, GO:0016020	NA	NA	NA	NA	NA	PF01762
pdam_00000672	0.0971935	0.0554216	0.192153	0.737433	0.865531	0.282914	NA	NA	NA	NA	unknown function	GO:0005102	NA	NA	NA	NA	NA	PF14722
pdam_00000674	-0.0766024	0.265866	0.260723	0.89074	0.550767	0.400893	NA	NA	NA	FIBCD1	Techylectin-5A (Tachypleus tridentatus)	GO:0016020	GO:0003674,GO:0005488,GO:0005575,GO:0005576,GO:0005578,GO:0008061,GO:0016020,GO:0031012,GO:0044421,GO:0097367	NA	NA	NA	NA	PF00147, PF00812
pdam_00000675	-0.111234	-0.296645	-0.394689	0.744506	0.274549	0.0512293	NA	NA	NA	NA	unknown function	NA	NA	NA	K00907,K13412	Z	Cytoskeleton	NA
pdam_00000679	0.116099	0.111905	0.327043	0.558055	0.573774	0.00877349	NA	NA	Upregulated	ENTPD5	ENTPD5: Ectonucleoside triphosphate diphosphohydrolase 5 (Gallus gallus)	GO:0016787	GO:0000003,GO:0000139,GO:0003674,GO:0003824,GO:0004382,GO:0004551,GO:0005575,GO:0005576,GO:0005622,GO:0005623,GO:0005737,GO:0005768,GO:0005783,GO:0005789,GO:0005794,GO:0005802,GO:0005975,GO:0005996,GO:0006006,GO:0006007,GO:0006091,GO:0006096,GO:0006139,GO:0006163,GO:0006213,GO:0006220,GO:0006457,GO:0006458,GO:0006464,GO:0006486,GO:0006487,GO:0006725,GO:0006753,GO:0006793,GO:0006796,GO:0006807,GO:…	K01511	K01511,K01526,K14641	F	Nucleotide transport and metabolism	PF01150
pdam_00000680	-0.0728299	0.679191	-0.159885	0.88566	0.0273415	0.586771	NA	Upregulated	NA	NA	unknown function	NA	NA	NA	NA	NA	NA	NA
pdam_00000681	-0.627672	-0.531133	-0.98998	0.157531	0.218708	0.00214469	NA	NA	Downregulated	NA	unknown function	NA	NA	NA	NA	NA	NA	NA
pdam_00000682	-1.25815	-0.585917	-1.75766	0.000352008	0.153127	8.35233e-09	Downregulated	NA	Downregulated	NA	unknown function	NA	NA	NA	NA	NA	NA	NA
pdam_00000683	-0.444234	-0.304075	-0.882283	0.0411096	0.178932	1.26963e-07	Downregulated	NA	Downregulated	NA	unknown function	NA	NA	NA	NA	NA	NA	NA
pdam_00000684	-0.894019	-0.483197	-1.31028	0.00091155	0.111757	1.06488e-08	Downregulated	NA	Downregulated	NA	unknown function	NA	NA	NA	NA	NA	NA	NA
pdam_00000686	-0.034169	0.0440841	0.833916	0.950182	0.936473	0.000986428	NA	NA	Upregulated	TRAK2	Trak1: Trafficking kinesin-binding protein 1 (Mus musculus)	NA	GO:0000003,GO:0002064,GO:0003006,GO:0003674,GO:0005102,GO:0005488,GO:0005515,GO:0005575,GO:0005622,GO:0005623,GO:0005634,GO:0005737,GO:0005739,GO:0005768,GO:0005769,GO:0005886,GO:0005975,GO:0006355,GO:0006357,GO:0006464,GO:0006486,GO:0006493,GO:0006605,GO:0006810,GO:0006836,GO:0006886,GO:0006928,GO:0006996,GO:0007005,GO:0007017,GO:0007018,GO:0007034,GO:0007041,GO:0007276,GO:0007281,GO:0007283,GO:…	K15369	K15369,K15374	U	Intracellular trafficking, secretion, and vesicular transport	PF04849
pdam_00000688	-0.266661	0.258886	0.219439	0.154002	0.138883	0.117857	NA	NA	NA	ERP44	ERP44: Endoplasmic reticulum resident protein 44 (Homo sapiens)	GO:0045454	GO:0000003,GO:0003006,GO:0003674,GO:0003756,GO:0003824,GO:0005575,GO:0005622,GO:0005623,GO:0005737,GO:0005783,GO:0005788,GO:0005789,GO:0005793,GO:0006457,GO:0006810,GO:0006897,GO:0006898,GO:0006950,GO:0006986,GO:0007275,GO:0007548,GO:0008150,GO:0008152,GO:0009100,GO:0009986,GO:0009987,GO:0010033,GO:0010876,GO:0012505,GO:0015036,GO:0015037,GO:0016020,GO:0016192,GO:0016491,GO:0016667,GO:0016853,GO:…	K17264	K17264	O	Posttranslational modification, protein turnover, chaperones	PF00085, PF13848
pdam_00000691	-0.433808	-0.287381	-0.775775	0.14887	0.354407	0.000387911	NA	NA	Downregulated	NA	unknown function	NA	NA	NA	NA	NA	NA	NA
pdam_00000693	0.0881541	0.144348	0.524373	0.535183	0.237609	1.60778e-09	NA	NA	Upregulated	SEC9	Snap25: Synaptosomal-associated protein 25 (Rattus norvegicus)	NA	GO:0000003,GO:0001505,GO:0003001,GO:0003006,GO:0003008,GO:0003674,GO:0005483,GO:0005484,GO:0005488,GO:0005515,GO:0005575,GO:0005622,GO:0005623,GO:0005628,GO:0005737,GO:0005886,GO:0006461,GO:0006810,GO:0006836,GO:0006887,GO:0006892,GO:0006893,GO:0006904,GO:0007049,GO:0007154,GO:0007267,GO:0007268,GO:0007269,GO:0007271,GO:0007275,GO:0008150,GO:0009653,GO:0009987,GO:0010646,GO:0010927,GO:0016020,GO:…	K18211	K06115,K08508,K18211,K18212,K19950	U	Intracellular trafficking, secretion, and vesicular transport	PF00835
pdam_00000695	0.0407167	0.175075	0.274605	0.862378	0.310901	0.0275741	NA	NA	Upregulated	DNAJC7	Dnajc7: DnaJ homolog subfamily C member 7 (Mus musculus)	GO:0005515	GO:0003674,GO:0005488,GO:0005515,GO:0005575,GO:0005622,GO:0005623,GO:0005634,GO:0005737,GO:0005829,GO:0005856,GO:0006457,GO:0008150,GO:0008152,GO:0009987,GO:0016023,GO:0019538,GO:0030139,GO:0030544,GO:0031072,GO:0031410,GO:0031982,GO:0031988,GO:0032991,GO:0042026,GO:0043170,GO:0043226,GO:0043227,GO:0043228,GO:0043229,GO:0043231,GO:0043232,GO:0043234,GO:0044237,GO:0044238,GO:0044260,GO:0044267,GO:…	K09527	K09527	O	Posttranslational modification, protein turnover, chaperones	PF00515, PF13174, PF13432
pdam_00000696	-0.225986	0.0315429	-0.10491	0.346408	0.92621	0.571712	NA	NA	NA	UBE2E3	Ube2e3: Ubiquitin-conjugating enzyme E2 E3 (Mus musculus)	NA	GO:0000209,GO:0003674,GO:0003824,GO:0004842,GO:0005575,GO:0005622,GO:0005623,GO:0005634,GO:0005737,GO:0006464,GO:0008150,GO:0008152,GO:0009987,GO:0010099,GO:0010876,GO:0016567,GO:0016874,GO:0016879,GO:0016881,GO:0019538,GO:0019787,GO:0019915,GO:0032446,GO:0033036,GO:0036211,GO:0043170,GO:0043226,GO:0043227,GO:0043229,GO:0043231,GO:0043412,GO:0044237,GO:0044238,GO:0044260,GO:0044267,GO:0044424,GO:…	K20217	K06689	O	Posttranslational modification, protein turnover, chaperones	PF00179
pdam_00000697	0.188845	0.197541	0.0784213	0.386469	0.345246	0.642152	NA	NA	NA	MALSU1	MALSU1: Mitochondrial assembly of ribosomal large subunit protein 1 (Homo sapiens)	NA	GO:0005575,GO:0005622,GO:0005623,GO:0005737,GO:0005739,GO:0005759,GO:0006417,GO:0008150,GO:0009889,GO:0009890,GO:0009892,GO:0010468,GO:0010556,GO:0010558,GO:0010605,GO:0010608,GO:0010639,GO:0010821,GO:0010823,GO:0017148,GO:0019222,GO:0022613,GO:0031323,GO:0031324,GO:0031326,GO:0031327,GO:0031974,GO:0032268,GO:0032269,GO:0033043,GO:0042254,GO:0042273,GO:0043226,GO:0043227,GO:0043229,GO:0043231,GO:…	NA	NA	NA	NA	PF02410
pdam_00000698	-0.350102	-0.224366	-0.619358	0.170105	0.398216	0.000796492	NA	NA	Downregulated	NA	Npffr2: Neuropeptide FF receptor 2 (Rattus norvegicus)	GO:0004930, GO:0004983, GO:0007186, GO:0016021	GO:0005575,GO:0005623,GO:0005886,GO:0016020,GO:0044464,GO:0071944	K14071	K04231,K04239,K08375	T	Signal transduction mechanisms	PF00001
pdam_00000699	0.209977	0.102765	0.36256	0.271938	0.637729	0.00634367	NA	NA	Upregulated	DDHD1	DDHD1: Phospholipase DDHD1 (Bos taurus)	GO:0046872	GO:0000325,GO:0001786,GO:0003674,GO:0003824,GO:0004620,GO:0004623,GO:0005488,GO:0005515,GO:0005543,GO:0005546,GO:0005575,GO:0005622,GO:0005623,GO:0005634,GO:0005737,GO:0005773,GO:0005774,GO:0005783,GO:0005829,GO:0005911,GO:0006066,GO:0006461,GO:0006576,GO:0006629,GO:0006644,GO:0006650,GO:0006793,GO:0006796,GO:0006807,GO:0006996,GO:0008150,GO:0008152,GO:0008289,GO:0008970,GO:0009056,GO:0009308,GO:…	K13619	K13619	NA	NA	PF02862
pdam_00000700	0.118817	0.163909	0.45053	0.530325	0.332386	0.000133522	NA	NA	Upregulated	FG03177.1	FGF4: Fibroblast growth factor 4 (Gallus gallus)	GO:0008083	NA	NA	K14541,K15528	J	Translation, ribosomal structure and biogenesis	PF00167
pdam_00000701	-0.142709	-0.265719	-0.236876	0.383473	0.0495346	0.0353047	NA	Downregulated	Downregulated	UBE2E3	Ubc2: Ubiquitin-conjugating enzyme E2-24 kDa (Drosophila melanogaster)	NA	GO:0000075,GO:0000151,GO:0000209,GO:0000278,GO:0003674,GO:0003824,GO:0004842,GO:0005575,GO:0005622,GO:0005623,GO:0005634,GO:0005654,GO:0005737,GO:0005829,GO:0006325,GO:0006464,GO:0006508,GO:0006511,GO:0006513,GO:0006996,GO:0007049,GO:0007088,GO:0007093,GO:0007094,GO:0007154,GO:0007165,GO:0007166,GO:0007346,GO:0008150,GO:0008152,GO:0009056,GO:0009057,GO:0009892,GO:0009893,GO:0009987,GO:0010033,GO:…	K20217	K06689	O	Posttranslational modification, protein turnover, chaperones	PF00179
pdam_00000702	-0.176619	-0.0689173	-0.067463	0.425728	0.796676	0.690785	NA	NA	NA	UBE2E3	UBE2E2: Ubiquitin-conjugating enzyme E2 E2 (Homo sapiens)	NA	GO:0000075,GO:0000151,GO:0000209,GO:0000278,GO:0003674,GO:0003824,GO:0004842,GO:0005575,GO:0005622,GO:0005623,GO:0005634,GO:0005654,GO:0005737,GO:0005829,GO:0006325,GO:0006464,GO:0006508,GO:0006511,GO:0006513,GO:0006996,GO:0007049,GO:0007088,GO:0007093,GO:0007094,GO:0007154,GO:0007165,GO:0007166,GO:0007346,GO:0008150,GO:0008152,GO:0009056,GO:0009057,GO:0009892,GO:0009893,GO:0009987,GO:0010033,GO:…	K20217	K06689	O	Posttranslational modification, protein turnover, chaperones	PF00179
pdam_00000704	-0.104973	-0.0950603	0.446542	0.560965	0.605188	5.63053e-05	NA	NA	Upregulated	CHMP2A	chmp2a: Charged multivesicular body protein 2a (Danio rerio)	GO:0007034	GO:0000003,GO:0000815,GO:0005575,GO:0005622,GO:0005623,GO:0005737,GO:0005768,GO:0005770,GO:0005771,GO:0005829,GO:0006508,GO:0006511,GO:0006605,GO:0006623,GO:0006810,GO:0006886,GO:0006900,GO:0006996,GO:0007034,GO:0007275,GO:0008104,GO:0008150,GO:0008152,GO:0009056,GO:0009057,GO:0009653,GO:0009790,GO:0009792,GO:0009987,GO:0010008,GO:0015031,GO:0016020,GO:0016043,GO:0016044,GO:0016050,GO:0016192,GO:…	K12191	K12191	U	Intracellular trafficking, secretion, and vesicular transport	PF03357
pdam_00000708	0.267066	0.272805	0.232038	0.481015	0.46583	0.391887	NA	NA	NA	CTDSP2	Ctdsp1: Carboxy-terminal domain RNA polymerase II polypeptide A small phosphatase 1 (Mus musculus)	GO:0016791	GO:0000003,GO:0001932,GO:0001934,GO:0003674,GO:0003824,GO:0004721,GO:0004722,GO:0005488,GO:0005515,GO:0005575,GO:0005622,GO:0005623,GO:0005634,GO:0005654,GO:0005737,GO:0005886,GO:0006355,GO:0006357,GO:0006464,GO:0006470,GO:0006793,GO:0006796,GO:0006950,GO:0006970,GO:0006972,GO:0006984,GO:0006986,GO:0006987,GO:0007154,GO:0007165,GO:0007275,GO:0007399,GO:0007610,GO:0008150,GO:0008152,GO:0008420,GO:…	K15731	K15731	K	Transcription	PF03031
pdam_00000709	0.225578	0.350355	0.525845	0.372053	0.111099	0.00191131	NA	NA	Upregulated	PA2G4	Pa2g4: Proliferation-associated protein 2G4 (Mus musculus)	NA	GO:0001071,GO:0003674,GO:0003676,GO:0003677,GO:0003700,GO:0003824,GO:0004177,GO:0005488,GO:0005575,GO:0005622,GO:0005623,GO:0005634,GO:0005730,GO:0005737,GO:0005829,GO:0006355,GO:0007049,GO:0007050,GO:0008150,GO:0008152,GO:0008233,GO:0008237,GO:0008238,GO:0008283,GO:0009889,GO:0009890,GO:0009892,GO:0009987,GO:0010468,GO:0010556,GO:0010558,GO:0010605,GO:0010629,GO:0016787,GO:0019219,GO:0019222,GO:…	NA	K01265,K14813	J	Translation, ribosomal structure and biogenesis	PF00557
pdam_00000710	0.292463	0.383877	0.730656	0.13002	0.0223633	9.41554e-08	NA	Upregulated	Upregulated	GMPPA	gmppaa: Mannose-1-phosphate guanyltransferase alpha-A (Danio rerio)	GO:0009058, GO:0016779	GO:0003674,GO:0003824,GO:0004475,GO:0005575,GO:0005622,GO:0005623,GO:0005634,GO:0005737,GO:0005777,GO:0005829,GO:0005975,GO:0006139,GO:0006464,GO:0006486,GO:0006487,GO:0006488,GO:0006725,GO:0006753,GO:0006793,GO:0006796,GO:0006807,GO:0008150,GO:0008152,GO:0008905,GO:0009058,GO:0009059,GO:0009100,GO:0009101,GO:0009117,GO:0009165,GO:0009225,GO:0009226,GO:0009298,GO:0009987,GO:0010035,GO:0010038,GO:…	K00966	K00966,K14000	M	Cell wall/membrane/envelope biogenesis	PF00132, PF00483
pdam_00000711	-0.703295	-0.446129	-1.1711	0.138509	0.370304	0.000733522	NA	NA	Downregulated	NA	DRD1: D(1A) dopamine receptor (Macaca mulatta)	GO:0004930, GO:0007186, GO:0016021	NA	NA	K04136	T	Signal transduction mechanisms	PF00001
pdam_00000713	-0.0405291	-0.0290202	-0.118866	0.830415	0.888271	0.281659	NA	NA	NA	VPS39	Vps39: Vam6/Vps39-like protein (Mus musculus)	GO:0005515, GO:0006886, GO:0016192, GO:0030897, GO:0097576	GO:0000322,GO:0000323,GO:0000324,GO:0000329,GO:0000902,GO:0001654,GO:0002009,GO:0003674,GO:0005083,GO:0005085,GO:0005088,GO:0005575,GO:0005622,GO:0005623,GO:0005634,GO:0005737,GO:0005764,GO:0005765,GO:0005768,GO:0005770,GO:0005773,GO:0005774,GO:0005829,GO:0005911,GO:0006810,GO:0006914,GO:0006944,GO:0006950,GO:0006995,GO:0006996,GO:0007033,GO:0007154,GO:0007163,GO:0007275,GO:0007399,GO:0007423,GO:…	K20183	NA	U	Intracellular trafficking, secretion, and vesicular transport	PF00780, PF10366, PF10367
pdam_00000714	-0.262089	0.102134	0.220399	0.0566974	0.541145	0.0408996	NA	NA	Upregulated	EIF1	CG17737: Protein translation factor SUI1 homolog (Drosophila melanogaster)	GO:0003743, GO:0006413	GO:0000003,GO:0001666,GO:0002119,GO:0002164,GO:0002181,GO:0002183,GO:0003006,GO:0003674,GO:0003676,GO:0003723,GO:0003743,GO:0005488,GO:0005515,GO:0005575,GO:0005622,GO:0005623,GO:0005634,GO:0005737,GO:0005829,GO:0006412,GO:0006413,GO:0006417,GO:0006446,GO:0006915,GO:0006928,GO:0006950,GO:0007275,GO:0007548,GO:0007549,GO:0007568,GO:0008135,GO:0008150,GO:0008152,GO:0008219,GO:0008340,GO:0008406,GO:…	K03113	K03113,K03352	J	Translation, ribosomal structure and biogenesis	PF01253
pdam_00000717	0.0141188	0.134492	-0.253086	0.969466	0.643342	0.181017	NA	NA	NA	NA	unknown function	NA	NA	NA	NA	NA	NA	NA
pdam_00000721	-0.0825097	-0.292757	-0.444077	0.812329	0.272755	0.0224481	NA	NA	Downregulated	FSTL4	Fstl5: Follistatin-related protein 5 (Mus musculus)	GO:0005509, GO:0005515	GO:0005575,GO:0005576	K23915	NA	NA	NA	PF07648, PF076795
pdam_00000722	-0.210825	-0.19702	-0.146689	0.510964	0.544784	0.526133	NA	NA	NA	LRPAP1	Lrpap1: Alpha-2-macroglobulin receptor-associated protein (Mus musculus)	GO:0005783, GO:0008201, GO:0050750	GO:0003674,GO:0004872,GO:0004873,GO:0005102,GO:0005488,GO:0005515,GO:0005539,GO:0005575,GO:0005576,GO:0005622,GO:0005623,GO:0005737,GO:0005783,GO:0005788,GO:0005791,GO:0005856,GO:0005875,GO:0005886,GO:0006457,GO:0006810,GO:0006897,GO:0006898,GO:0008150,GO:0008152,GO:0008201,GO:0009966,GO:0009968,GO:0009986,GO:0009987,GO:0010469,GO:0010646,GO:0010648,GO:0010915,GO:0010916,GO:0010984,GO:0010985,GO:…	K22290	NA	NA	NA	PF06400, PF06401
pdam_00000723	0.167947	-0.0332519	0.0160509	0.402408	0.905287	0.923201	NA	NA	NA	NA	unknown function	GO:0005215, GO:0016021, GO:0055085	NA	NA	NA	G	Carbohydrate transport and metabolism	PF07690, PF133473
pdam_00000724	-0.0545122	-0.105501	0.194823	0.829561	0.642968	0.178447	NA	NA	NA	PKP4	CTNND2: Catenin delta-2 (Homo sapiens)	GO:0005488, GO:0005515, GO:0005913, GO:0010172, GO:0016337, GO:0032956, GO:0045296	GO:0000922,GO:0001654,GO:0001667,GO:0001704,GO:0001707,GO:0001738,GO:0001745,GO:0001763,GO:0002009,GO:0003008,GO:0003674,GO:0005488,GO:0005515,GO:0005575,GO:0005622,GO:0005623,GO:0005634,GO:0005737,GO:0005813,GO:0005815,GO:0005819,GO:0005829,GO:0005856,GO:0005886,GO:0005911,GO:0005912,GO:0005913,GO:0005915,GO:0006140,GO:0006928,GO:0007043,GO:0007154,GO:0007155,GO:0007158,GO:0007165,GO:0007267,GO:…	K23491	K05690	NA	NA	PF00514, PF01477
pdam_00000727	0.181282	0.0147118	0.267637	0.28342	0.956028	0.0236243	NA	NA	Upregulated	DNAAF3	dnaaf3: Dynein assembly factor 3%2C axonemal (Xenopus laevis)	NA	GO:0000902,GO:0003341,GO:0005575,GO:0005622,GO:0005623,GO:0005737,GO:0006461,GO:0006928,GO:0006996,GO:0007017,GO:0007018,GO:0008150,GO:0009653,GO:0009987,GO:0010927,GO:0016043,GO:0022607,GO:0030030,GO:0030031,GO:0032502,GO:0032989,GO:0032990,GO:0034622,GO:0042384,GO:0043623,GO:0043933,GO:0044085,GO:0044424,GO:0044458,GO:0044464,GO:0044699,GO:0044763,GO:0044767,GO:0044782,GO:0048646,GO:0048856,GO:…	K19752	K19752	NA	NA	PF14737, PF14740
pdam_00000728	-0.0617344	0.118996	0.170554	0.843834	0.666942	0.347802	NA	NA	NA	NA	unknown function	GO:0005739, GO:0005747	NA	NA	NA	NA	NA	PF15880
pdam_00000730	-0.0569016	-0.0255213	0.455354	0.839713	0.938283	0.00250033	NA	NA	Upregulated	PPP1R2	Ppp1r2: Protein phosphatase inhibitor 2 (Rattus norvegicus)	GO:0004864, GO:0009966, GO:0043666	GO:0003674,GO:0004857,GO:0004864,GO:0004865,GO:0005488,GO:0005515,GO:0006091,GO:0007275,GO:0008150,GO:0008152,GO:0008157,GO:0009790,GO:0009792,GO:0009892,GO:0009987,GO:0010563,GO:0010605,GO:0019208,GO:0019212,GO:0019220,GO:0019222,GO:0019888,GO:0019899,GO:0019902,GO:0019903,GO:0030234,GO:0031323,GO:0031324,GO:0031399,GO:0031400,GO:0032268,GO:0032269,GO:0032501,GO:0032502,GO:0035303,GO:0035304,GO:…	K16833	K16833	T	Signal transduction mechanisms	PF04979
pdam_00000731	0.406188	0.0519832	0.493094	0.0431649	0.867346	0.001526	Upregulated	NA	Upregulated	GCAT	GCAT: 2-amino-3-ketobutyrate coenzyme A ligase%2C mitochondrial (Homo sapiens)	GO:0003824, GO:0006567, GO:0008152, GO:0008890, GO:0009058, GO:0016740, GO:0030170	GO:0003674,GO:0003824,GO:0005575,GO:0005622,GO:0005623,GO:0005634,GO:0005737,GO:0005739,GO:0005740,GO:0005743,GO:0005886,GO:0006082,GO:0006520,GO:0006807,GO:0008150,GO:0008152,GO:0008890,GO:0009987,GO:0016020,GO:0016407,GO:0016408,GO:0016453,GO:0016740,GO:0016746,GO:0016747,GO:0019752,GO:0019866,GO:0031090,GO:0031966,GO:0031967,GO:0031975,GO:0043226,GO:0043227,GO:0043229,GO:0043231,GO:0043436,GO:…	K00639	K00639,K00652	E	Amino acid transport and metabolism	PF00155
pdam_00000732	-0.0444345	0.826902	0.93539	0.87987	5.72508e-09	5.44044e-11	NA	Upregulated	Upregulated	BET1	Bet1: BET1 homolog (Mus musculus)	NA	GO:0000139,GO:0000322,GO:0000323,GO:0000324,GO:0000329,GO:0003674,GO:0005484,GO:0005488,GO:0005515,GO:0005575,GO:0005622,GO:0005623,GO:0005634,GO:0005737,GO:0005773,GO:0005774,GO:0005783,GO:0005789,GO:0005794,GO:0005795,GO:0005801,GO:0005886,GO:0006810,GO:0006886,GO:0006888,GO:0006890,GO:0006906,GO:0006944,GO:0006996,GO:0007275,GO:0007399,GO:0008104,GO:0008150,GO:0009987,GO:0012505,GO:0015031,GO:…	K08504	K08504	U	Intracellular trafficking, secretion, and vesicular transport	NA
pdam_00000735	0.209568	0.000286539	-0.313054	0.243077	0.999172	0.0170408	NA	NA	Downregulated	B3GNT1	b4gat1: Beta-1%2C4-glucuronyltransferase 1 (Danio rerio)	NA	GO:0000139,GO:0000271,GO:0003674,GO:0003824,GO:0005575,GO:0005622,GO:0005623,GO:0005737,GO:0005794,GO:0005975,GO:0005976,GO:0006022,GO:0006023,GO:0006024,GO:0006082,GO:0006790,GO:0006807,GO:0008150,GO:0008152,GO:0008194,GO:0008375,GO:0008532,GO:0009058,GO:0009059,GO:0009987,GO:0012505,GO:0016020,GO:0016021,GO:0016051,GO:0016740,GO:0016757,GO:0016758,GO:0018146,GO:0030173,GO:0030203,GO:0030309,GO:…	K21032	K00741	G	Carbohydrate transport and metabolism	PF13896
pdam_00000736	-0.0664345	-0.155144	-0.32924	0.700383	0.265033	0.000996416	NA	NA	Downregulated	EPS8	Eps8: Epidermal growth factor receptor kinase substrate 8 (Rattus norvegicus)	GO:0005515	GO:0000003,GO:0001726,GO:0002119,GO:0002164,GO:0003008,GO:0003674,GO:0003779,GO:0005070,GO:0005488,GO:0005515,GO:0005575,GO:0005622,GO:0005623,GO:0005737,GO:0005856,GO:0005886,GO:0005887,GO:0005902,GO:0005903,GO:0005938,GO:0006810,GO:0006897,GO:0006898,GO:0006996,GO:0007010,GO:0007015,GO:0007154,GO:0007165,GO:0007166,GO:0007167,GO:0007169,GO:0007173,GO:0007264,GO:0007265,GO:0007267,GO:0007268,GO:…	K17277	K17277	T	Signal transduction mechanisms	PF00018, PF08416
pdam_00000737	0.0918807	0.054494	-0.0141918	0.79615	0.891	0.954781	NA	NA	NA	NA	Lrrd1: Leucine-rich repeat and death domain-containing protein 1 (Mus musculus)	GO:0005515	NA	NA	NA	T	Signal transduction mechanisms	PF13855
pdam_00000738	-0.228161	0.236423	0.302042	0.206066	0.158868	0.0193331	NA	NA	Upregulated	PLS1	PLS3: Plastin-3 (Cricetulus griseus)	GO:0005509, GO:0005515	GO:0000003,GO:0000902,GO:0000904,GO:0000910,GO:0000912,GO:0000915,GO:0000916,GO:0001411,GO:0001726,GO:0001775,GO:0001891,GO:0002252,GO:0002263,GO:0002285,GO:0002286,GO:0002366,GO:0002376,GO:0003006,GO:0003674,GO:0003779,GO:0005198,GO:0005200,GO:0005488,GO:0005509,GO:0005515,GO:0005575,GO:0005618,GO:0005622,GO:0005623,GO:0005737,GO:0005773,GO:0005826,GO:0005829,GO:0005856,GO:0005884,GO:0005886,GO:…	K17336	K15423,K17275,K17276,K17336	Z	Cytoskeleton	PF00307, PF13499
pdam_00000740	-0.031235	-0.105156	-0.271982	0.854893	0.433877	0.00271632	NA	NA	Downregulated	PLCL2	PLCL2: Inactive phospholipase C-like protein 2 (Homo sapiens)	GO:0004435, GO:0006629, GO:0007165, GO:0008081, GO:0035556	GO:0000003,GO:0003674,GO:0003824,GO:0004620,GO:0004629,GO:0005102,GO:0005488,GO:0005515,GO:0005575,GO:0005622,GO:0005623,GO:0005737,GO:0007097,GO:0007154,GO:0007165,GO:0007338,GO:0007610,GO:0008081,GO:0008150,GO:0008152,GO:0009566,GO:0009987,GO:0016298,GO:0016787,GO:0016788,GO:0019953,GO:0022414,GO:0023052,GO:0035046,GO:0035556,GO:0040023,GO:0042578,GO:0044424,GO:0044464,GO:0044699,GO:0044700,GO:…	K15375	K05857,K15370,K15375	I	Lipid transport and metabolism	PF00168, PF00387, PF00388, PF09279, PF16457
pdam_00000741	-0.183018	0.0174433	0.303477	0.60261	0.973265	0.181488	NA	NA	NA	NA	B4GALNT4: N-acetyl-beta-glucosaminyl-glycoprotein 4-beta-N-acetylgalactosaminyltransferase 1 (Homo sapiens)	GO:0008376, GO:0032580	NA	NA	NA	G	Carbohydrate transport and metabolism	PF05679, PF07691
pdam_00000743	0.109923	0.179809	0.240098	0.603779	0.32314	0.0721473	NA	NA	NA	UGT8	UGT2C1: UDP-glucuronosyltransferase 2C1 (Fragment) (Oryctolagus cuniculus)	GO:0003677, GO:0008152, GO:0016758	GO:0000003,GO:0000902,GO:0001508,GO:0001523,GO:0001889,GO:0001972,GO:0002175,GO:0002237,GO:0002526,GO:0003006,GO:0003008,GO:0003674,GO:0003824,GO:0004857,GO:0005488,GO:0005496,GO:0005501,GO:0005515,GO:0005575,GO:0005622,GO:0005623,GO:0005737,GO:0005739,GO:0005740,GO:0005743,GO:0005783,GO:0005789,GO:0005886,GO:0005887,GO:0005975,GO:0005996,GO:0006063,GO:0006066,GO:0006082,GO:0006629,GO:0006643,GO:…	K00699	K00699,K00967,K04628,K05841	NA	NA	PF00201, PF15963
pdam_00000746	0.210334	0.357258	0.280019	0.443757	0.127854	0.138649	NA	NA	NA	NA	ZNF431: Zinc finger protein 431 (Homo sapiens)	GO:0003676	NA	NA	NA	K	Transcription	PF00096
pdam_00000747	0.169563	0.114307	0.647859	0.470267	0.644761	1.0638e-05	NA	NA	Upregulated	NA	unknown function	NA	NA	NA	NA	NA	NA	NA
pdam_00000748	0.229337	-0.165831	-0.870267	0.573949	0.705685	0.000688958	NA	NA	Downregulated	NCAPD3	NCAPD3: Condensin-2 complex subunit D3 (Homo sapiens)	GO:0005488, GO:0007076	GO:0000003,GO:0000070,GO:0000226,GO:0000228,GO:0000278,GO:0000280,GO:0000775,GO:0000779,GO:0000785,GO:0000790,GO:0000792,GO:0000793,GO:0000794,GO:0000796,GO:0000799,GO:0000819,GO:0001674,GO:0002119,GO:0002164,GO:0003006,GO:0003674,GO:0005488,GO:0005515,GO:0005575,GO:0005622,GO:0005623,GO:0005634,GO:0005654,GO:0005694,GO:0005720,GO:0005721,GO:0006139,GO:0006259,GO:0006323,GO:0006725,GO:0006807,GO:…	K11491	K09518,K11491	NA	NA	PF12717, PF12765
pdam_00000749	0.112029	-0.050164	0.2399	0.622407	0.851589	0.0923202	NA	NA	NA	TMEM101	TMEM101: Transmembrane protein 101 (Homo sapiens)	NA	GO:0003674,GO:0004871,GO:0005575,GO:0007154,GO:0007165,GO:0008150,GO:0009966,GO:0009967,GO:0009987,GO:0010627,GO:0010646,GO:0010647,GO:0010740,GO:0016020,GO:0023051,GO:0023052,GO:0023056,GO:0043122,GO:0043123,GO:0044699,GO:0044700,GO:0044763,GO:0048518,GO:0048522,GO:0048583,GO:0048584,GO:0050789,GO:0050794,GO:0050896,GO:0051716,GO:0060089,GO:0065007	NA	NA	NA	NA	PF15111
pdam_00000751	-0.112282	0.0227823	-0.462082	0.818742	0.972272	0.10009	NA	NA	NA	ENC1	Ipp: Actin-binding protein IPP (Mus musculus)	GO:0005515	GO:0005575,GO:0005622,GO:0005623,GO:0005634,GO:0005737,GO:0005856,GO:0007275,GO:0007399,GO:0008150,GO:0016363,GO:0031974,GO:0031981,GO:0032501,GO:0032502,GO:0034399,GO:0043226,GO:0043227,GO:0043228,GO:0043229,GO:0043231,GO:0043232,GO:0043233,GO:0043581,GO:0044422,GO:0044424,GO:0044428,GO:0044446,GO:0044464,GO:0044699,GO:0044707,GO:0044767,GO:0048731,GO:0048856,GO:0070013	NA	K10447,K10461,K10462,K13959	T	Signal transduction mechanisms	PF00651, PF077071
pdam_00000754	-0.191779	-0.0912441	-0.525631	0.532633	0.801367	0.00767556	NA	NA	Downregulated	KLHL20	KLHL12: Kelch-like protein 12 (Homo sapiens)	GO:0005515	GO:0000151,GO:0000902,GO:0003008,GO:0003674,GO:0003779,GO:0003824,GO:0004842,GO:0005488,GO:0005515,GO:0005575,GO:0005622,GO:0005623,GO:0005634,GO:0005654,GO:0005737,GO:0005794,GO:0005856,GO:0006464,GO:0006508,GO:0006511,GO:0006996,GO:0007010,GO:0007154,GO:0007267,GO:0007268,GO:0007275,GO:0007399,GO:0008092,GO:0008150,GO:0008152,GO:0009056,GO:0009057,GO:0009653,GO:0009986,GO:0009987,GO:0010033,GO:…	NA	K10457	T	Signal transduction mechanisms	PF00651, PF01344, PF077071
pdam_00000756	0.0143362	0.613174	1.0669	0.970395	0.00242971	1.36056e-09	NA	Upregulated	Upregulated	NA	unknown function	NA	NA	NA	NA	NA	NA	PF15136
pdam_00000757	-0.0495527	-0.335098	-0.772965	0.907226	0.266985	0.000412629	NA	NA	Downregulated	MSH3	MSH3: DNA mismatch repair protein Msh3 (Homo sapiens)	GO:0005524, GO:0006298, GO:0030983, GO:0045454	GO:0000003,GO:0000018,GO:0000166,GO:0000217,GO:0000228,GO:0000403,GO:0000404,GO:0000406,GO:0000710,GO:0000735,GO:0000737,GO:0001882,GO:0001883,GO:0002200,GO:0002376,GO:0002377,GO:0002440,GO:0002520,GO:0002562,GO:0003006,GO:0003674,GO:0003676,GO:0003677,GO:0003684,GO:0003690,GO:0003824,GO:0005488,GO:0005524,GO:0005575,GO:0005622,GO:0005623,GO:0005634,GO:0005694,GO:0005737,GO:0006139,GO:0006152,GO:…	K08736	K08736	L	Replication, recombination and repair	PF00085, PF00488, PF01624, PF05188, PF05190, PF05192
pdam_00000759	-0.0368297	-0.0450953	0.0203307	0.896365	0.875308	0.907852	NA	NA	NA	GLA	NAGA: Alpha-N-acetylgalactosaminidase (Gallus gallus)	GO:0003824, GO:0004553, GO:0005975	GO:0000323,GO:0003674,GO:0003824,GO:0004553,GO:0004557,GO:0005102,GO:0005488,GO:0005515,GO:0005575,GO:0005576,GO:0005622,GO:0005623,GO:0005737,GO:0005764,GO:0005773,GO:0005775,GO:0005794,GO:0005975,GO:0006629,GO:0006643,GO:0006644,GO:0006664,GO:0006665,GO:0006672,GO:0006677,GO:0006687,GO:0006793,GO:0006796,GO:0006807,GO:0008150,GO:0008152,GO:0008456,GO:0009056,GO:0009311,GO:0009889,GO:0009890,GO:…	K01204	K01189,K01204	G	Carbohydrate transport and metabolism	PF16499, PF17450
pdam_00000760	0.111445	-0.0175313	0.214557	0.381919	0.922523	0.0127423	NA	NA	Upregulated	NAGA	NAGA: Alpha-N-acetylgalactosaminidase (Gallus gallus)	GO:0003824, GO:0004553, GO:0005975	GO:0000323,GO:0003674,GO:0003824,GO:0004553,GO:0004557,GO:0005575,GO:0005622,GO:0005623,GO:0005737,GO:0005764,GO:0005773,GO:0005975,GO:0006629,GO:0006643,GO:0006664,GO:0006665,GO:0006672,GO:0006677,GO:0006687,GO:0006807,GO:0008150,GO:0008152,GO:0008456,GO:0009056,GO:0009311,GO:0009987,GO:0015925,GO:0015929,GO:0016042,GO:0016052,GO:0016137,GO:0016139,GO:0016787,GO:0016798,GO:0019377,GO:0030149,GO:…	K01204	K01189,K01204	G	Carbohydrate transport and metabolism	PF16499, PF17450
pdam_00000761	-0.023651	-0.234982	-0.870705	0.958672	0.47917	6.53178e-05	NA	NA	Downregulated	NA	unknown function	NA	NA	NA	NA	NA	NA	NA
pdam_00000762	-0.250459	-0.260983	-0.88044	0.397464	0.360806	6.02496e-06	NA	NA	Downregulated	RGMB	RGMB: RGM domain family member B (Homo sapiens)	NA	GO:0000902,GO:0000904,GO:0001704,GO:0001707,GO:0001708,GO:0001710,GO:0001838,GO:0001841,GO:0001843,GO:0001932,GO:0001934,GO:0002009,GO:0003674,GO:0004871,GO:0004872,GO:0005488,GO:0005515,GO:0005575,GO:0005576,GO:0005615,GO:0005622,GO:0005623,GO:0005737,GO:0005783,GO:0005793,GO:0005886,GO:0006355,GO:0006357,GO:0006928,GO:0006935,GO:0007154,GO:0007155,GO:0007165,GO:0007166,GO:0007167,GO:0007178,GO:…	K23096	K06847	O	Posttranslational modification, protein turnover, chaperones	PF06534, PF06535
pdam_00000763	-0.620123	0.758513	0.423316	0.00262752	3.11456e-05	0.0166745	Downregulated	Upregulated	Upregulated	PDIA3	PDIA3: Protein disulfide-isomerase A3 (Pongo abelii)	GO:0005783, GO:0016853, GO:0045454	GO:0000003,GO:0002376,GO:0002474,GO:0002478,GO:0002479,GO:0003674,GO:0003756,GO:0003810,GO:0003824,GO:0004175,GO:0004197,GO:0004620,GO:0004629,GO:0005575,GO:0005622,GO:0005623,GO:0005737,GO:0005783,GO:0005788,GO:0005811,GO:0005856,GO:0005875,GO:0005975,GO:0006457,GO:0006464,GO:0006486,GO:0006487,GO:0006605,GO:0006606,GO:0006621,GO:0006810,GO:0006886,GO:0006913,GO:0007154,GO:0007165,GO:0007275,GO:…	K08056	K08056,K09580,K09582	O	Posttranslational modification, protein turnover, chaperones	PF00085, PF13848
pdam_00000765	0.071484	0.110492	0.358608	0.722245	0.547605	0.00186582	NA	NA	Upregulated	ARNT	Arnt: Aryl hydrocarbon receptor nuclear translocator (Mus musculus)	GO:0003700, GO:0005634, GO:0005667, GO:0005737, GO:0006355, GO:0046983	GO:0000003,GO:0000122,GO:0000902,GO:0000904,GO:0000981,GO:0000988,GO:0000989,GO:0001071,GO:0001085,GO:0001666,GO:0001701,GO:0001708,GO:0001709,GO:0001817,GO:0001819,GO:0001890,GO:0001892,GO:0001936,GO:0001938,GO:0002682,GO:0003674,GO:0003676,GO:0003677,GO:0003700,GO:0003712,GO:0003713,GO:0004871,GO:0004872,GO:0004874,GO:0005488,GO:0005515,GO:0005575,GO:0005622,GO:0005623,GO:0005634,GO:0005654,GO:…	K09097	K09097,K15589	K	Transcription	PF00010, PF00989, PF14598
pdam_00000766	0.0766196	-0.00351433	0.379345	0.753432	0.993505	0.00637917	NA	NA	Upregulated	USP3	Usp3: Ubiquitin carboxyl-terminal hydrolase 3 (Mus musculus)	GO:0006511, GO:0008270, GO:0016579, GO:0036459	GO:0000228,GO:0000278,GO:0000785,GO:0000790,GO:0003674,GO:0003824,GO:0004221,GO:0004843,GO:0005575,GO:0005622,GO:0005623,GO:0005634,GO:0005694,GO:0006139,GO:0006259,GO:0006281,GO:0006325,GO:0006464,GO:0006725,GO:0006807,GO:0006950,GO:0006974,GO:0006996,GO:0007049,GO:0008150,GO:0008152,GO:0008233,GO:0008234,GO:0009987,GO:0010468,GO:0010608,GO:0016043,GO:0016568,GO:0016569,GO:0016570,GO:0016578,GO:…	K11986	K11366,K11855,K11986	O	Posttranslational modification, protein turnover, chaperones	PF00443, PF02148
pdam_00000767	-0.13945	0.324535	-0.180937	0.660222	0.19723	0.382238	NA	NA	NA	SLC24A2	SLC24A2: Sodium/potassium/calcium exchanger 2 (Gallus gallus)	GO:0016021, GO:0055085	GO:0000902,GO:0001654,GO:0003008,GO:0003674,GO:0005215,GO:0005216,GO:0005261,GO:0005262,GO:0005488,GO:0005509,GO:0005515,GO:0005575,GO:0005623,GO:0005886,GO:0005887,GO:0006810,GO:0006811,GO:0006812,GO:0006813,GO:0006814,GO:0006816,GO:0006873,GO:0006874,GO:0006875,GO:0007275,GO:0007399,GO:0007423,GO:0007600,GO:0007601,GO:0007610,GO:0007611,GO:0007612,GO:0007613,GO:0008150,GO:0008273,GO:0008324,GO:…	K13750	K13749,K13750	P	Inorganic ion transport and metabolism	PF01699
pdam_00000768	-0.606673	-0.0941199	-0.145757	0.0539679	0.841261	0.598203	NA	NA	NA	HOMER2	HOMER2: Homer protein homolog 2 (Homo sapiens)	NA	GO:0001894,GO:0003008,GO:0003009,GO:0003012,GO:0003674,GO:0003779,GO:0005102,GO:0005198,GO:0005488,GO:0005515,GO:0005575,GO:0005622,GO:0005623,GO:0005737,GO:0005783,GO:0005856,GO:0005886,GO:0005887,GO:0006936,GO:0006941,GO:0006950,GO:0007154,GO:0007165,GO:0007166,GO:0007186,GO:0007200,GO:0007206,GO:0007215,GO:0007216,GO:0007267,GO:0007268,GO:0007275,GO:0007517,GO:0007519,GO:0007610,GO:0007622,GO:…	K15010	K15010	T	Signal transduction mechanisms	PF00568
pdam_00000769	0.209479	0.158808	0.301098	0.0636438	0.162294	0.000430912	NA	NA	Upregulated	IL16	IL16: Pro-interleukin-16 (Homo sapiens)	GO:0005515	GO:0002376,GO:0003674,GO:0005102,GO:0005125,GO:0005488,GO:0005515,GO:0005575,GO:0005576,GO:0005615,GO:0005622,GO:0005623,GO:0005634,GO:0005737,GO:0005886,GO:0006928,GO:0006935,GO:0006955,GO:0008150,GO:0009605,GO:0009987,GO:0016020,GO:0016477,GO:0030595,GO:0032101,GO:0032103,GO:0040011,GO:0040012,GO:0040017,GO:0042221,GO:0042330,GO:0043226,GO:0043227,GO:0043229,GO:0043231,GO:0044421,GO:0044424,GO:…	K22628	NA	O	Posttranslational modification, protein turnover, chaperones	PF00595
pdam_00000771	-0.477195	-0.108017	-0.354247	0.000905657	0.596488	0.00477957	Downregulated	NA	Downregulated	RPL17	Rpl17: 60S ribosomal protein L17 (Rattus norvegicus)	GO:0003735, GO:0005622, GO:0005840, GO:0006412, GO:0015934	GO:0000003,GO:0000022,GO:0000184,GO:0000226,GO:0000278,GO:0000956,GO:0002119,GO:0002164,GO:0002181,GO:0003674,GO:0003735,GO:0005198,GO:0005575,GO:0005576,GO:0005622,GO:0005623,GO:0005634,GO:0005730,GO:0005737,GO:0005773,GO:0005774,GO:0005829,GO:0005840,GO:0005886,GO:0005911,GO:0006139,GO:0006401,GO:0006402,GO:0006412,GO:0006413,GO:0006414,GO:0006415,GO:0006605,GO:0006612,GO:0006613,GO:0006614,GO:…	K02880	K02880	J	Translation, ribosomal structure and biogenesis	_APF00237
pdam_00000772	0.108687	0.0462655	0.118446	0.337355	0.730226	0.14688	NA	NA	NA	FPR4	FKBP46: 46 kDa FK506-binding nuclear protein (Spodoptera frugiperda)	NA	GO:0000003,GO:0000075,GO:0000183,GO:0000279,GO:0000412,GO:0000413,GO:0000414,GO:0000415,GO:0000975,GO:0001067,GO:0001775,GO:0002376,GO:0003674,GO:0003676,GO:0003677,GO:0003755,GO:0003824,GO:0005488,GO:0005515,GO:0005527,GO:0005528,GO:0005575,GO:0005622,GO:0005623,GO:0005634,GO:0005730,GO:0005737,GO:0005783,GO:0005789,GO:0005829,GO:0005856,GO:0005875,GO:0006139,GO:0006259,GO:0006323,GO:0006325,GO:…	NA	K01802,K14826	O	Posttranslational modification, protein turnover, chaperones	PF00254
pdam_00000774	0.066889	0.031703	0.0279197	0.873856	0.947747	0.917455	NA	NA	NA	PFKFB3	6-phosphofructo-2-kinase/fructose-2%2C6-bisphosphatase (Lithobates catesbeiana)	GO:0003824, GO:0003873, GO:0005524, GO:0006000, GO:0006003, GO:0008152	GO:0000166,GO:0001882,GO:0001883,GO:0002165,GO:0002791,GO:0002793,GO:0003674,GO:0003824,GO:0003873,GO:0004331,GO:0005488,GO:0005515,GO:0005524,GO:0005575,GO:0005622,GO:0005623,GO:0005634,GO:0005737,GO:0005829,GO:0005975,GO:0005996,GO:0006000,GO:0006003,GO:0006006,GO:0006007,GO:0006082,GO:0006089,GO:0006090,GO:0006091,GO:0006094,GO:0006096,GO:0006109,GO:0006112,GO:0006793,GO:0006796,GO:0006950,GO:…	K19029	K00900,K01103,K19028,K19029,K19030	G	Carbohydrate transport and metabolism	PF00300, PF01591
pdam_00000776	0.216634	0.00306676	-0.0639681	0.31352	0.994974	0.711867	NA	NA	NA	MAP2K1	MAP2K2: Dual specificity mitogen-activated protein kinase kinase 2 (Gallus gallus)	GO:0004672, GO:0005524, GO:0006468	GO:0000003,GO:0000165,GO:0000166,GO:0000186,GO:0000187,GO:0000278,GO:0000280,GO:0000578,GO:0000902,GO:0000904,GO:0001568,GO:0001654,GO:0001667,GO:0001701,GO:0001703,GO:0001745,GO:0001751,GO:0001752,GO:0001754,GO:0001882,GO:0001883,GO:0001890,GO:0001892,GO:0001932,GO:0001934,GO:0001944,GO:0002009,GO:0002119,GO:0002164,GO:0002218,GO:0002221,GO:0002224,GO:0002253,GO:0002376,GO:0002682,GO:0002684,GO:…	K04368	K04368,K04369	T	Signal transduction mechanisms	PF00069
pdam_00000777	-0.593919	-0.601399	-2.08377	0.151549	0.121227	1.06117e-12	NA	NA	Downregulated	NA	unknown function	GO:0005515	NA	NA	NA	NA	NA	NA
pdam_00000778	-0.0842554	-0.0719139	0.684461	0.919271	0.937561	0.118279	NA	NA	NA	NA	Kinesin light chain (Doryteuthis pealeii)	GO:0005515	NA	NA	NA	NA	NA	PF13374, PF13424
pdam_00000783	-0.599092	-0.986855	-3.02749	0.29543	0.0425349	4.76279e-15	NA	Downregulated	Downregulated	NA	PAO: Polyamine oxidase (Zea mays)	GO:0016491, GO:0055114	GO:0000166,GO:0003674,GO:0003824,GO:0005488,GO:0006576,GO:0006595,GO:0006598,GO:0006807,GO:0008150,GO:0008152,GO:0009056,GO:0009308,GO:0009310,GO:0009987,GO:0016491,GO:0016645,GO:0016647,GO:0034641,GO:0036094,GO:0042402,GO:0043167,GO:0043168,GO:0044106,GO:0044237,GO:0044710,GO:0046592,GO:0048037,GO:0050660,GO:0050662,GO:0055114,GO:0071704,GO:0097159,GO:1901265,GO:1901363,GO:1901564,GO:1901565,GO:…	K13367	K13366	Q	Secondary metabolites biosynthesis, transport and catabolism	PF01593
pdam_00000786	0.0601656	0.155774	0.436304	0.89334	0.686416	0.0616631	NA	NA	NA	MAP3K2	MAP3K2: Mitogen-activated protein kinase kinase kinase 2 (Homo sapiens)	GO:0004672, GO:0005524, GO:0006468	GO:0000003,GO:0000161,GO:0000165,GO:0000186,GO:0000187,GO:0000196,GO:0000746,GO:0000747,GO:0000749,GO:0000750,GO:0000751,GO:0000909,GO:0000910,GO:0000912,GO:0000915,GO:0001402,GO:0001403,GO:0001411,GO:0001932,GO:0001934,GO:0003006,GO:0003674,GO:0003824,GO:0004672,GO:0004674,GO:0004702,GO:0004709,GO:0004871,GO:0005057,GO:0005488,GO:0005515,GO:0005575,GO:0005622,GO:0005623,GO:0005634,GO:0005635,GO:…	NA	K04420,K04421,K08867,K11228	T	Signal transduction mechanisms	PF00069
pdam_00000787	0.189602	0.327582	0.828636	0.275495	0.0223999	7.55304e-13	NA	Upregulated	Upregulated	MTX3	MTX1: Metaxin-1 (Sus scrofa)	GO:0005741, GO:0006626	GO:0000003,GO:0003674,GO:0005488,GO:0005515,GO:0005575,GO:0005622,GO:0005623,GO:0005737,GO:0005739,GO:0005740,GO:0005741,GO:0005743,GO:0006605,GO:0006626,GO:0006810,GO:0006839,GO:0006886,GO:0006996,GO:0007005,GO:0008104,GO:0008150,GO:0008152,GO:0009536,GO:0009987,GO:0015031,GO:0016020,GO:0016021,GO:0016043,GO:0016482,GO:0019538,GO:0019866,GO:0019867,GO:0031090,GO:0031224,GO:0031966,GO:0031967,GO:…	K17776	K17776	U	Intracellular trafficking, secretion, and vesicular transport	PF10568, PF17171,
pdam_00000788	0.178337	-0.155703	-0.398023	0.416404	0.489354	0.00651261	NA	NA	Downregulated	LMNB1	LMNB1: Lamin-B1 (Homo sapiens)	GO:0005198, GO:0005882	GO:0000003,GO:0000079,GO:0000086,GO:0000226,GO:0000278,GO:0000280,GO:0000910,GO:0001654,GO:0001666,GO:0001745,GO:0001763,GO:0001932,GO:0001934,GO:0002009,GO:0002119,GO:0002164,GO:0003006,GO:0003008,GO:0003013,GO:0003015,GO:0003674,GO:0005198,GO:0005488,GO:0005515,GO:0005575,GO:0005622,GO:0005623,GO:0005634,GO:0005635,GO:0005637,GO:0005638,GO:0005652,GO:0005654,GO:0005737,GO:0005811,GO:0005813,GO:…	K07611	K07611,K12641	NA	NA	PF00038, PF00932
pdam_00000790	0.0776976	0.0314399	0.309657	0.703211	0.893082	0.00855559	NA	NA	Upregulated	CDK7	CDK7: Cyclin-dependent kinase 7 (Homo sapiens)	GO:0004672, GO:0005524, GO:0006468	GO:0000079,GO:0000080,GO:0000082,GO:0000084,GO:0000086,GO:0000278,GO:0000280,GO:0000307,GO:0000428,GO:0000718,GO:0000988,GO:0000989,GO:0001109,GO:0001111,GO:0001932,GO:0001934,GO:0003674,GO:0003712,GO:0003713,GO:0003824,GO:0004672,GO:0004674,GO:0004693,GO:0005102,GO:0005488,GO:0005509,GO:0005515,GO:0005575,GO:0005622,GO:0005623,GO:0005634,GO:0005654,GO:0005667,GO:0005675,GO:0005737,GO:0005739,GO:…	K02202	K02202,K08817	D	Cell cycle control, cell division, chromosome partitioning	PF00069
pdam_00000791	-0.0249918	0.0754154	0.0616793	0.809774	0.358343	0.31953	NA	NA	NA	UBAP2L	FXN: Frataxin%2C mitochondrial (Homo sapiens)	GO:0004322, GO:0005515, GO:0005739, GO:0008199, GO:0016226, GO:0055114	GO:0000003,GO:0007338,GO:0007339,GO:0008037,GO:0008150,GO:0009566,GO:0009987,GO:0009988,GO:0019953,GO:0022414,GO:0032501,GO:0035036,GO:0044699,GO:0044702,GO:0044707,GO:0044763,GO:0048610	K19054	NA	O	Posttranslational modification, protein turnover, chaperones	PF01491, PF12478
pdam_00000794	-0.0749681	-0.0466191	-0.212272	0.572997	0.752955	0.0111296	NA	NA	Downregulated	HNRNPK	PCBP3: Poly(rC)-binding protein 3 (Homo sapiens)	GO:0003676, GO:0003723	GO:0000003,GO:0000228,GO:0000375,GO:0000377,GO:0000398,GO:0000785,GO:0000790,GO:0000975,GO:0000976,GO:0000977,GO:0000978,GO:0000981,GO:0000982,GO:0000987,GO:0001012,GO:0001067,GO:0001071,GO:0001077,GO:0001159,GO:0001228,GO:0003674,GO:0003676,GO:0003677,GO:0003697,GO:0003700,GO:0003723,GO:0005488,GO:0005515,GO:0005575,GO:0005622,GO:0005623,GO:0005634,GO:0005654,GO:0005681,GO:0005694,GO:0005737,GO:…	K12886	K00733,K12886	A	RNA processing and modification	PF00013
pdam_00000795	0.0207619	0.171187	0.366081	0.950182	0.470878	0.0201993	NA	NA	Upregulated	HMGCR	HMGCR: 3-hydroxy-3-methylglutaryl-coenzyme A reductase (Bos taurus)	GO:0004420, GO:0005789, GO:0008299, GO:0015936, GO:0016021, GO:0016616, GO:0050661, GO:0050662, GO:0055114	GO:0000003,GO:0000166,GO:0001568,GO:0001932,GO:0001933,GO:0001944,GO:0001955,GO:0002119,GO:0002164,GO:0002791,GO:0002792,GO:0003006,GO:0003007,GO:0003008,GO:0003674,GO:0003824,GO:0004420,GO:0005488,GO:0005515,GO:0005575,GO:0005622,GO:0005623,GO:0005634,GO:0005635,GO:0005737,GO:0005777,GO:0005778,GO:0005783,GO:0005789,GO:0006066,GO:0006084,GO:0006461,GO:0006469,GO:0006629,GO:0006637,GO:0006644,GO:…	K00021	K00021	I	Lipid transport and metabolism	PF00368, PF12349
pdam_00000796	0.0373386	-0.167196	-0.186822	0.803337	0.117098	0.0297412	NA	NA	Downregulated	TUBGCP4	Tubgcp4: Gamma-tubulin complex component 4 (Mus musculus)	GO:0000226, GO:0000922, GO:0005815, GO:0007020, GO:0043015	GO:0000003,GO:0000086,GO:0000212,GO:0000226,GO:0000278,GO:0000280,GO:0000578,GO:0000910,GO:0000930,GO:0000931,GO:0003002,GO:0003006,GO:0003674,GO:0005198,GO:0005200,GO:0005488,GO:0005515,GO:0005575,GO:0005622,GO:0005623,GO:0005737,GO:0005813,GO:0005815,GO:0005829,GO:0005856,GO:0005911,GO:0006403,GO:0006461,GO:0006996,GO:0007010,GO:0007017,GO:0007020,GO:0007049,GO:0007051,GO:0007052,GO:0007056,GO:…	K16571	K16571	Z	Cytoskeleton	PF04130
pdam_00000797	-0.430613	-0.0990119	-0.187945	0.00717812	0.652742	0.179369	Downregulated	NA	NA	RPS6	RPS6: 40S ribosomal protein S6 (Gallus gallus)	GO:0003735, GO:0005622, GO:0005840, GO:0006412	GO:0000003,GO:0000022,GO:0000028,GO:0000184,GO:0000226,GO:0000278,GO:0000462,GO:0000956,GO:0002119,GO:0002164,GO:0002181,GO:0002376,GO:0003674,GO:0003735,GO:0005198,GO:0005575,GO:0005622,GO:0005623,GO:0005634,GO:0005730,GO:0005737,GO:0005829,GO:0005840,GO:0005886,GO:0005911,GO:0006139,GO:0006364,GO:0006396,GO:0006401,GO:0006402,GO:0006412,GO:0006413,GO:0006414,GO:0006415,GO:0006605,GO:0006612,GO:…	K02991	K02991	J	Translation, ribosomal structure and biogenesis	PF01092
pdam_00000798	0.0559921	0.0888818	0.208109	0.766466	0.603572	0.0575611	NA	NA	NA	DET1	DET1: DET1 homolog (Homo sapiens)	NA	GO:0000003,GO:0000122,GO:0001708,GO:0003006,GO:0003674,GO:0003682,GO:0005488,GO:0005575,GO:0005622,GO:0005623,GO:0005634,GO:0005694,GO:0005700,GO:0006139,GO:0006259,GO:0006281,GO:0006355,GO:0006357,GO:0006725,GO:0006807,GO:0006950,GO:0006974,GO:0007275,GO:0007276,GO:0007292,GO:0008150,GO:0008152,GO:0008283,GO:0009605,GO:0009889,GO:0009890,GO:0009892,GO:0009987,GO:0009991,GO:0010468,GO:0010556,GO:…	K10571	K10571	K	Transcription	PF09737
pdam_00000799	-0.129372	0.371774	0.964419	0.648355	0.0829242	3.6549e-09	NA	NA	Upregulated	KRTCAP2	Protein KRTCAP2 homolog (Ixodes scapularis)	NA	GO:0005575,GO:0005576,GO:0005615,GO:0005622,GO:0005623,GO:0005737,GO:0005783,GO:0005975,GO:0006464,GO:0006486,GO:0006487,GO:0008150,GO:0008152,GO:0009058,GO:0009059,GO:0009100,GO:0009101,GO:0009987,GO:0016020,GO:0018193,GO:0018196,GO:0018279,GO:0019538,GO:0034645,GO:0036211,GO:0043170,GO:0043226,GO:0043227,GO:0043229,GO:0043231,GO:0043412,GO:0043413,GO:0044237,GO:0044238,GO:0044249,GO:0044260,GO:…	NA	NA	NA	NA	PF09775
pdam_00000803	-0.0122246	0.0413027	0.782993	0.980688	0.93663	0.000999608	NA	NA	Upregulated	NA	abhd8: Protein ABHD8 (Xenopus laevis)	GO:0003824	NA	K13701	K13701	NA	NA	PF00561
pdam_00000804	0.0851148	-0.0906632	-0.110366	0.749579	0.734568	0.520125	NA	NA	NA	POLR3C	POLR3C: DNA-directed RNA polymerase III subunit RPC3 (Bos taurus)	GO:0003677, GO:0003899, GO:0006351	GO:0000003,GO:0000428,GO:0000922,GO:0001817,GO:0001819,GO:0002119,GO:0002164,GO:0002682,GO:0002684,GO:0003674,GO:0003824,GO:0003899,GO:0005575,GO:0005622,GO:0005623,GO:0005634,GO:0005654,GO:0005666,GO:0005815,GO:0005816,GO:0005819,GO:0005856,GO:0006139,GO:0006351,GO:0006353,GO:0006354,GO:0006355,GO:0006359,GO:0006383,GO:0006385,GO:0006386,GO:0006725,GO:0006807,GO:0007275,GO:0008150,GO:0008152,GO:…	K03023	K03023	K	Transcription	PF05645, PF08221
pdam_00000805	0.059235	-0.137795	-0.448007	0.749391	0.368051	2.03137e-05	NA	NA	Downregulated	MOCS2	Mocs2: Molybdopterin synthase sulfur carrier subunit (Drosophila ananassae)	NA	GO:0000123,GO:0003674,GO:0003824,GO:0005575,GO:0005622,GO:0005623,GO:0005634,GO:0005654,GO:0005671,GO:0005694,GO:0005700,GO:0005737,GO:0005829,GO:0006325,GO:0006338,GO:0006464,GO:0006473,GO:0006475,GO:0006732,GO:0006766,GO:0006767,GO:0006777,GO:0006793,GO:0006796,GO:0006807,GO:0006996,GO:0007154,GO:0007165,GO:0008150,GO:0008152,GO:0009058,GO:0009108,GO:0009719,GO:0009725,GO:0009733,GO:0009734,GO:…	K21232	K03635	C	Energy production and conversion	PF02597
pdam_00000806	-0.0967616	-0.0300442	0.0105672	0.474102	0.860675	0.922551	NA	NA	NA	NA	Sodium channel protein 1 brain (Heterololigo bleekeri)	GO:0001518, GO:0005216, GO:0005248, GO:0006811, GO:0006814, GO:0016020, GO:0055085	GO:0003674,GO:0005215,GO:0005216,GO:0005244,GO:0005248,GO:0005261,GO:0005272,GO:0005575,GO:0005623,GO:0005886,GO:0006810,GO:0006811,GO:0006812,GO:0006814,GO:0007610,GO:0007635,GO:0008150,GO:0008324,GO:0009987,GO:0015075,GO:0015077,GO:0015081,GO:0015267,GO:0015672,GO:0016020,GO:0022803,GO:0022832,GO:0022836,GO:0022838,GO:0022839,GO:0022843,GO:0022857,GO:0022890,GO:0022891,GO:0022892,GO:0030001,GO:…	K21862	K04834	P	Inorganic ion transport and metabolism	PF00520
pdam_00000807	-0.554592	-0.59625	0.181258	0.346938	0.293436	0.697648	NA	NA	NA	FST	FST: Follistatin (Equus caballus)	GO:0005515	GO:0005575,GO:0005576	K04661	NA	W	Extracellular structures	PF076485
pdam_00000808	-0.0282725	0.159323	0.77585	0.892119	0.266801	3.88166e-15	NA	NA	Upregulated	NA	KDM8: Lysine-specific demethylase 8 (Homo sapiens)	GO:0005509	NA	NA	K10277	NA	NA	PF13621
pdam_00000809	0.134246	0.0924424	0.297397	0.483674	0.653271	0.0180283	NA	NA	Upregulated	KLP2	KIN14I: Kinesin-like protein KIN-14I (Oryza sativa subsp. japonica)	GO:0003777, GO:0005524, GO:0007018, GO:0008017	GO:0000003,GO:0000022,GO:0000070,GO:0000166,GO:0000226,GO:0000228,GO:0000278,GO:0000280,GO:0000741,GO:0000742,GO:0000743,GO:0000746,GO:0000747,GO:0000775,GO:0000776,GO:0000777,GO:0000778,GO:0000779,GO:0000780,GO:0000793,GO:0000794,GO:0000819,GO:0000902,GO:0000904,GO:0000922,GO:0001882,GO:0001883,GO:0003674,GO:0003774,GO:0003777,GO:0003824,GO:0005488,GO:0005509,GO:0005515,GO:0005516,GO:0005524,GO:…	NA	K10405	Z	Cytoskeleton	PF00225
pdam_00000811	-0.225294	-0.00280918	0.202461	0.203447	0.994374	0.122279	NA	NA	NA	TPM1	Tropomyosin (Trichinella pseudospiralis)	NA	GO:0000003,GO:0000302,GO:0000578,GO:0000902,GO:0000904,GO:0000910,GO:0001701,GO:0001725,GO:0001726,GO:0001993,GO:0001996,GO:0002027,GO:0002102,GO:0002119,GO:0002164,GO:0003002,GO:0003006,GO:0003007,GO:0003008,GO:0003012,GO:0003013,GO:0003015,GO:0003044,GO:0003062,GO:0003065,GO:0003073,GO:0003205,GO:0003206,GO:0003208,GO:0003229,GO:0003231,GO:0003321,GO:0003674,GO:0003779,GO:0005198,GO:0005200,GO:…	K10373	K09290,K10373,K10374,K10375	Z	Cytoskeleton	PF00261
pdam_00000814	-0.321995	-0.667843	-1.36037	0.40401	0.0326932	5.99153e-08	NA	Downregulated	Downregulated	TPM1	Tropomyosin (Trichinella pseudospiralis)	NA	GO:0000003,GO:0000302,GO:0000578,GO:0000902,GO:0000904,GO:0000910,GO:0001701,GO:0001725,GO:0001726,GO:0001993,GO:0001996,GO:0002027,GO:0002102,GO:0002119,GO:0002164,GO:0003002,GO:0003006,GO:0003007,GO:0003008,GO:0003012,GO:0003013,GO:0003015,GO:0003044,GO:0003062,GO:0003065,GO:0003073,GO:0003205,GO:0003206,GO:0003208,GO:0003229,GO:0003231,GO:0003321,GO:0003674,GO:0003779,GO:0005198,GO:0005200,GO:…	NA	K09290,K10373,K10374,K10375	Z	Cytoskeleton	PF00261
pdam_00000815	0.278969	0.264768	0.110131	0.364255	0.372607	0.650863	NA	NA	NA	DAZL	bol: Protein boule (Drosophila melanogaster)	GO:0003676	GO:0000003,GO:0003006,GO:0003674,GO:0003676,GO:0003677,GO:0003723,GO:0003729,GO:0003730,GO:0005488,GO:0005575,GO:0005622,GO:0005623,GO:0005634,GO:0005737,GO:0005844,GO:0006417,GO:0006446,GO:0006928,GO:0007276,GO:0007281,GO:0008150,GO:0008354,GO:0008494,GO:0009889,GO:0009891,GO:0009893,GO:0009987,GO:0010468,GO:0010556,GO:0010557,GO:0010564,GO:0010604,GO:0010608,GO:0010628,GO:0016477,GO:0019222,GO:…	NA	NA	A	RNA processing and modification	PF00076
pdam_00000816	-0.0306946	0.146425	0.461417	0.912975	0.505031	0.00111426	NA	NA	Upregulated	POLR2J	POLR2J: DNA-directed RNA polymerase II subunit RPB11-a (Homo sapiens)	GO:0003677, GO:0003899, GO:0006351, GO:0046983	GO:0000003,GO:0000375,GO:0000377,GO:0000398,GO:0000428,GO:0002119,GO:0002164,GO:0003006,GO:0003674,GO:0003824,GO:0003899,GO:0005575,GO:0005622,GO:0005623,GO:0005634,GO:0005654,GO:0005665,GO:0005666,GO:0005737,GO:0005768,GO:0005829,GO:0005856,GO:0005886,GO:0005938,GO:0006139,GO:0006259,GO:0006281,GO:0006283,GO:0006289,GO:0006351,GO:0006352,GO:0006353,GO:0006354,GO:0006366,GO:0006367,GO:0006368,GO:…	K03008	K03008	K	Transcription	PF13656
pdam_00000817	0.392493	0.0850097	-0.506996	0.327462	0.87862	0.0805598	NA	NA	NA	CHAF1A	chaf1a-a: Chromatin assembly factor 1 subunit A-A (Xenopus laevis)	NA	GO:0000724,GO:0000725,GO:0003674,GO:0003682,GO:0005488,GO:0005515,GO:0005575,GO:0005622,GO:0005623,GO:0005634,GO:0006139,GO:0006259,GO:0006260,GO:0006261,GO:0006281,GO:0006302,GO:0006310,GO:0006323,GO:0006325,GO:0006333,GO:0006334,GO:0006335,GO:0006461,GO:0006725,GO:0006807,GO:0006950,GO:0006974,GO:0006996,GO:0007049,GO:0007275,GO:0007444,GO:0008150,GO:0008152,GO:0009058,GO:0009059,GO:0009314,GO:…	K10750	K10750	B	Chromatin structure and dynamics	PF11600, PF12253
pdam_00000818	0.116189	0.147034	0.387334	0.440206	0.288413	6.76183e-05	NA	NA	Upregulated	RNF115	Rnf115: E3 ubiquitin-protein ligase RNF115 (Mus musculus)	NA	GO:0003674,GO:0003824,GO:0004842,GO:0005575,GO:0005622,GO:0005623,GO:0005737,GO:0005829,GO:0005886,GO:0006464,GO:0007275,GO:0008150,GO:0008152,GO:0009987,GO:0016020,GO:0016567,GO:0016874,GO:0016879,GO:0016881,GO:0019538,GO:0019787,GO:0022622,GO:0032446,GO:0032501,GO:0032502,GO:0036211,GO:0043170,GO:0043412,GO:0044237,GO:0044238,GO:0044260,GO:0044267,GO:0044424,GO:0044444,GO:0044464,GO:0044699,GO:…	K11982	K11982	O	Posttranslational modification, protein turnover, chaperones	PF13639, PF14369
pdam_00000819	-0.110632	0.142689	0.367136	0.555291	0.412772	0.00167866	NA	NA	Upregulated	UNC13A	Unc13b: Protein unc-13 homolog B (Mus musculus)	GO:0007268, GO:0019992, GO:0035556	GO:0000149,GO:0000902,GO:0000904,GO:0001505,GO:0001956,GO:0003001,GO:0003008,GO:0003674,GO:0005488,GO:0005515,GO:0005516,GO:0005575,GO:0005622,GO:0005623,GO:0005737,GO:0005886,GO:0006461,GO:0006518,GO:0006807,GO:0006810,GO:0006836,GO:0006887,GO:0006897,GO:0006904,GO:0006928,GO:0006935,GO:0006996,GO:0007154,GO:0007267,GO:0007268,GO:0007269,GO:0007270,GO:0007275,GO:0007399,GO:0007409,GO:0007411,GO:…	K15293	K15293	NA	NA	PF00130, PF00168
pdam_00000820	-0.219597	-0.129203	-0.332652	0.121593	0.395184	0.0013461	NA	NA	Downregulated	DDA1	dda1: DET1- and DDB1-associated protein 1 (Xenopus tropicalis)	GO:0032434	NA	K11792	K11792	NA	NA	PF10172
pdam_00000821	0.118866	0.164487	0.110437	0.52197	0.323634	0.398151	NA	NA	NA	EFCAB2	Efcab2: EF-hand calcium-binding domain-containing protein 2 (Mus musculus)	GO:0005509	GO:0003674,GO:0005488,GO:0005509,GO:0043167,GO:0043169,GO:0046872	NA	K14401	T	Signal transduction mechanisms	PF09447, PF13499
pdam_00000822	0.125689	0.146904	0.106754	0.298384	0.174599	0.230776	NA	NA	NA	NA	unknown function	NA	NA	NA	NA	NA	NA	NA
pdam_00000823	0.188106	-0.117165	-0.53574	0.484985	0.695298	0.00252915	NA	NA	Downregulated	CEP120	CEP120: Centrosomal protein of 120 kDa (Bos taurus)	NA	GO:0000226,GO:0005575,GO:0005622,GO:0005623,GO:0005813,GO:0005815,GO:0005856,GO:0006996,GO:0007010,GO:0007017,GO:0007049,GO:0007051,GO:0007275,GO:0007399,GO:0007417,GO:0007420,GO:0008150,GO:0008283,GO:0009987,GO:0015630,GO:0016043,GO:0021537,GO:0021543,GO:0021846,GO:0021987,GO:0022008,GO:0022027,GO:0022402,GO:0030154,GO:0030900,GO:0030953,GO:0031122,GO:0032501,GO:0032502,GO:0032879,GO:0032880,GO:…	K16459	K16459	Z	Cytoskeleton	PF12416
pdam_00000824	-0.876324	-0.884955	-0.234743	0.233766	0.202792	0.694913	NA	NA	NA	PRDM6	Prdm6: Putative histone-lysine N-methyltransferase PRDM6 (Mus musculus)	GO:0003676, GO:0005515	GO:0003674,GO:0005488,GO:0005515,GO:0005575,GO:0005622,GO:0005623,GO:0005634,GO:0006355,GO:0007275,GO:0007399,GO:0008150,GO:0009889,GO:0009890,GO:0009892,GO:0009987,GO:0010468,GO:0010556,GO:0010558,GO:0010605,GO:0010629,GO:0019219,GO:0019222,GO:0022008,GO:0030154,GO:0031323,GO:0031324,GO:0031326,GO:0031327,GO:0032501,GO:0032502,GO:0042802,GO:0042803,GO:0043226,GO:0043227,GO:0043229,GO:0043231,GO:…	NA	NA	K	Transcription	PF00096, PF00856
pdam_00000825	0.367154	0.234638	0.411497	0.566159	0.739674	0.346314	NA	NA	NA	PRDM6	Prdm9: Histone-lysine N-methyltransferase PRDM9 (Rattus norvegicus)	GO:0003676, GO:0005515	GO:0003674,GO:0005488,GO:0005515,GO:0005575,GO:0005622,GO:0005623,GO:0005634,GO:0006355,GO:0007275,GO:0007399,GO:0008150,GO:0009889,GO:0009890,GO:0009892,GO:0009987,GO:0010468,GO:0010556,GO:0010558,GO:0010605,GO:0010629,GO:0019219,GO:0019222,GO:0022008,GO:0030154,GO:0031323,GO:0031324,GO:0031326,GO:0031327,GO:0032501,GO:0032502,GO:0042802,GO:0042803,GO:0043226,GO:0043227,GO:0043229,GO:0043231,GO:…	NA	NA	K	Transcription	PF00096, PF00856, PF13894
pdam_00000826	0.0291161	0.219702	-0.00532996	0.950182	0.52175	0.984282	NA	NA	NA	PRDM6	Prdm6: Putative histone-lysine N-methyltransferase PRDM6 (Mus musculus)	GO:0003676, GO:0005515	GO:0005575,GO:0005622,GO:0005623,GO:0005634,GO:0043226,GO:0043227,GO:0043229,GO:0043231,GO:0044424,GO:0044464	NA	NA	K	Transcription	PF00096, PF00856
pdam_00000827	0.298856	0.837359	0.703397	0.329839	0.000186901	0.00072094	NA	Upregulated	Upregulated	PRDM6	PRDM6: Putative histone-lysine N-methyltransferase PRDM6 (Homo sapiens)	GO:0003676, GO:0005515	GO:0003674,GO:0005488,GO:0005515,GO:0005575,GO:0005622,GO:0005623,GO:0005634,GO:0006355,GO:0007275,GO:0007399,GO:0008150,GO:0009889,GO:0009890,GO:0009892,GO:0009987,GO:0010468,GO:0010556,GO:0010558,GO:0010605,GO:0010629,GO:0019219,GO:0019222,GO:0022008,GO:0030154,GO:0031323,GO:0031324,GO:0031326,GO:0031327,GO:0032501,GO:0032502,GO:0042802,GO:0042803,GO:0043226,GO:0043227,GO:0043229,GO:0043231,GO:…	NA	NA	K	Transcription	PF00096, PF00856, PF13894
pdam_00000829	0.0355658	-0.274971	0.727228	0.961578	0.642428	0.0452152	NA	NA	Upregulated	PRDM6	PRDM6: Putative histone-lysine N-methyltransferase PRDM6 (Homo sapiens)	GO:0003676, GO:0005515	NA	NA	NA	K	Transcription	PF00096, PF00856
pdam_00000830	0.0325359	0.0486817	0.453668	0.95934	0.941177	0.154788	NA	NA	NA	PRDM6	PRDM6: Putative histone-lysine N-methyltransferase PRDM6 (Homo sapiens)	GO:0005515	GO:0005575,GO:0005622,GO:0005623,GO:0005634,GO:0043226,GO:0043227,GO:0043229,GO:0043231,GO:0044424,GO:0044464	NA	NA	K	Transcription	PF00856
pdam_00000831	-0.352431	0.34295	0.393731	0.358145	0.358343	0.148346	NA	NA	NA	PRDM6	PRDM6: Putative histone-lysine N-methyltransferase PRDM6 (Bos taurus)	GO:0003676, GO:0005515	GO:0003674,GO:0005488,GO:0005515,GO:0005575,GO:0005622,GO:0005623,GO:0005634,GO:0006355,GO:0007275,GO:0007399,GO:0008150,GO:0009889,GO:0009890,GO:0009892,GO:0009987,GO:0010468,GO:0010556,GO:0010558,GO:0010605,GO:0010629,GO:0019219,GO:0019222,GO:0022008,GO:0030154,GO:0031323,GO:0031324,GO:0031326,GO:0031327,GO:0032501,GO:0032502,GO:0042802,GO:0042803,GO:0043226,GO:0043227,GO:0043229,GO:0043231,GO:…	K20795	NA	K	Transcription	PF00096, PF00856, PF13894
pdam_00000832	-0.0824251	-0.0705526	0.102664	0.541059	0.609793	0.261376	NA	NA	NA	PAM	pam-a: Peptidyl-glycine alpha-amidating monooxygenase A (Xenopus laevis)	GO:0003824, GO:0004497, GO:0005507, GO:0005515, GO:0006518, GO:0016020, GO:0016715, GO:0055114	GO:0000003,GO:0000070,GO:0000228,GO:0000278,GO:0000280,GO:0000785,GO:0000790,GO:0000793,GO:0000819,GO:0001519,GO:0001666,GO:0001676,GO:0003008,GO:0003674,GO:0003682,GO:0003824,GO:0004497,GO:0004504,GO:0004598,GO:0005488,GO:0005507,GO:0005509,GO:0005575,GO:0005576,GO:0005615,GO:0005622,GO:0005623,GO:0005634,GO:0005694,GO:0005737,GO:0005802,GO:0005829,GO:0005886,GO:0005887,GO:0006082,GO:0006139,GO:…	K24006	K00504,K18200	O	Posttranslational modification, protein turnover, chaperones	PF01082, PF01436, PF037128
pdam_00000833	0.254362	0.298432	0.608803	0.24443	0.128224	4.33649e-05	NA	NA	Upregulated	PPIE	PPIE: Peptidyl-prolyl cis-trans isomerase E (Bos taurus)	GO:0000413, GO:0003676, GO:0003723, GO:0003755, GO:0006457	GO:0000184,GO:0000375,GO:0000377,GO:0000398,GO:0000413,GO:0000737,GO:0000956,GO:0003674,GO:0003676,GO:0003723,GO:0003729,GO:0003755,GO:0003824,GO:0004518,GO:0005488,GO:0005515,GO:0005575,GO:0005622,GO:0005623,GO:0005634,GO:0005654,GO:0005681,GO:0005737,GO:0005829,GO:0006139,GO:0006259,GO:0006308,GO:0006309,GO:0006351,GO:0006353,GO:0006355,GO:0006366,GO:0006369,GO:0006396,GO:0006397,GO:0006401,GO:…	K09564	K01802,K09564	O	Posttranslational modification, protein turnover, chaperones	PF00076, PF00160
pdam_00000834	0.159733	0.0832097	0.0874189	0.439928	0.726088	0.57108	NA	NA	NA	SMG5	Smg5: Protein SMG5 (Mus musculus)	GO:0005515	GO:0000184,GO:0000956,GO:0003674,GO:0005488,GO:0005515,GO:0005575,GO:0005622,GO:0005623,GO:0005634,GO:0005737,GO:0005829,GO:0006139,GO:0006401,GO:0006402,GO:0006403,GO:0006405,GO:0006406,GO:0006725,GO:0006807,GO:0006810,GO:0006913,GO:0008150,GO:0008152,GO:0009056,GO:0009057,GO:0009987,GO:0010467,GO:0015931,GO:0016070,GO:0016071,GO:0016482,GO:0019220,GO:0019222,GO:0019439,GO:0019899,GO:0019902,GO:…	K11125	K11125	A	RNA processing and modification	PF10373, PF10374, PF13638
pdam_00000835	-0.0624704	-0.131825	-0.324685	0.758842	0.450787	0.00526618	NA	NA	Downregulated	TLE1	TLE1: Transducin-like enhancer protein 1 (Homo sapiens)	GO:0005515, GO:0005634, GO:0006355	GO:0000003,GO:0000122,GO:0000902,GO:0000904,GO:0000981,GO:0000988,GO:0000989,GO:0001071,GO:0001076,GO:0001104,GO:0001106,GO:0001191,GO:0001501,GO:0001505,GO:0002009,GO:0002119,GO:0002164,GO:0002376,GO:0002520,GO:0003006,GO:0003008,GO:0003674,GO:0003682,GO:0003700,GO:0003705,GO:0003712,GO:0003714,GO:0005488,GO:0005515,GO:0005575,GO:0005622,GO:0005623,GO:0005634,GO:0005654,GO:0005667,GO:0005737,GO:…	NA	K04497	B	Chromatin structure and dynamics	PF00400, PF03920
pdam_00000836	0.0291729	0.0872879	0.219308	0.905109	0.668661	0.0869026	NA	NA	NA	NA	mrpl54: 39S ribosomal protein L54%2C mitochondrial (Danio rerio)	NA	NA	NA	K17435	NA	NA	PF08561
pdam_00000837	0.260111	-0.230314	-0.343589	0.259157	0.324155	0.0454393	NA	NA	Downregulated	SPATA5L1	SPATA5L1: Spermatogenesis-associated protein 5-like protein 1 (Bos taurus)	GO:0005524	GO:0003674,GO:0003824,GO:0005575,GO:0005622,GO:0005623,GO:0005634,GO:0005737,GO:0005783,GO:0006139,GO:0006152,GO:0006163,GO:0006195,GO:0006200,GO:0006725,GO:0006753,GO:0006793,GO:0006796,GO:0006807,GO:0008150,GO:0008152,GO:0009056,GO:0009116,GO:0009117,GO:0009119,GO:0009123,GO:0009125,GO:0009126,GO:0009128,GO:0009141,GO:0009143,GO:0009144,GO:0009146,GO:0009150,GO:0009154,GO:0009158,GO:0009161,GO:…	NA	NA	O	Posttranslational modification, protein turnover, chaperones	PF00004
pdam_00000838	0.164515	0.095203	0.103469	0.684223	NA	0.709975	NA	NA	NA	NA	unknown function	NA	NA	NA	NA	NA	NA	NA
pdam_00000841	0.148593	0.131342	0.0936804	0.404296	0.459518	0.48123	NA	NA	NA	NA	POLR2M: DNA-directed RNA polymerase II subunit GRINL1A (Bos taurus)	GO:0016591	NA	NA	NA	NA	NA	PF15328
pdam_00000842	0.0698474	-0.0175371	-0.0190467	0.632894	0.9245	0.856812	NA	NA	NA	C1ORF43	Uncharacterized protein C1orf43 homolog (Mus musculus)	NA	GO:0005575,GO:0016020	NA	NA	NA	NA	PF07406
pdam_00000844	0.140355	0.0658327	-0.0599179	0.525424	0.801608	0.71732	NA	NA	NA	PPCDC	Ppcdc: Phosphopantothenoylcysteine decarboxylase (Mus musculus)	GO:0003824	GO:0000003,GO:0000166,GO:0002119,GO:0002164,GO:0003674,GO:0003824,GO:0004633,GO:0004799,GO:0004857,GO:0004864,GO:0005488,GO:0005575,GO:0005622,GO:0005623,GO:0005634,GO:0005737,GO:0005829,GO:0006082,GO:0006139,GO:0006163,GO:0006164,GO:0006220,GO:0006221,GO:0006231,GO:0006520,GO:0006575,GO:0006725,GO:0006732,GO:0006753,GO:0006766,GO:0006767,GO:0006793,GO:0006796,GO:0006807,GO:0006810,GO:0006873,GO:…	K01598	K00560,K00652,K01598,K18172	NA	NA	PF02441
pdam_00000845	-0.556193	-0.143169	-0.220252	0.0512493	0.687098	0.350655	NA	NA	NA	RAB10	RAB10: Ras-related protein Rab-10 (Gallus gallus)	GO:0003924, GO:0005525	GO:0000003,GO:0000131,GO:0000166,GO:0000282,GO:0000902,GO:0000904,GO:0000910,GO:0001738,GO:0001881,GO:0001882,GO:0001883,GO:0002009,GO:0002119,GO:0002164,GO:0003006,GO:0003674,GO:0003824,GO:0003924,GO:0005488,GO:0005515,GO:0005525,GO:0005575,GO:0005622,GO:0005623,GO:0005634,GO:0005737,GO:0005739,GO:0005740,GO:0005741,GO:0005768,GO:0005769,GO:0005783,GO:0005789,GO:0005794,GO:0005795,GO:0005797,GO:…	NA	K07901,K07903,K18158	U	Intracellular trafficking, secretion, and vesicular transport	PF00071, PF03036
pdam_00000846	-0.0479536	0.140576	0.107389	0.906648	0.691634	0.653702	NA	NA	NA	NA	unknown function	NA	NA	NA	NA	NA	NA	NA
pdam_00000848	0.0919871	-0.0625533	-0.228237	0.724949	0.82816	0.151975	NA	NA	NA	NA	unknown function	NA	NA	NA	NA	NA	NA	PF02437
pdam_00000849	0.196069	-0.214675	-0.36716	0.306592	0.235173	0.00683761	NA	NA	Downregulated	IKBKAP	Ikbkap: Elongator complex protein 1 (Rattus norvegicus)	GO:0002098, GO:0005515, GO:0006355, GO:0033588	GO:0000003,GO:0000166,GO:0000428,GO:0001172,GO:0001882,GO:0001883,GO:0001932,GO:0002097,GO:0002098,GO:0002119,GO:0002164,GO:0002376,GO:0003006,GO:0003008,GO:0003674,GO:0003824,GO:0003968,GO:0004402,GO:0004672,GO:0004871,GO:0005488,GO:0005524,GO:0005575,GO:0005622,GO:0005623,GO:0005634,GO:0005654,GO:0005730,GO:0005737,GO:0005829,GO:0006139,GO:0006213,GO:0006325,GO:0006351,GO:0006354,GO:0006355,GO:…	K11373	K11373	K	Transcription	PF04762
pdam_00000851	0.173205	0.179403	0.279011	0.331738	0.293436	0.0242047	NA	NA	Upregulated	NA	gpr54: G-protein coupled receptor 54 (Oreochromis niloticus)	GO:0004930, GO:0007186, GO:0016021	GO:0005575,GO:0005623,GO:0005886,GO:0016020,GO:0044464,GO:0071944	NA	NA	T	Signal transduction mechanisms	PF00001
pdam_00000852	0.158098	0.158931	0.36832	0.646601	0.625228	0.0798379	NA	NA	NA	NA	Cxcr2: C-X-C chemokine receptor type 2 (Rattus norvegicus)	GO:0004930, GO:0007186, GO:0016021	GO:0005575,GO:0005623,GO:0005886,GO:0016020,GO:0044464,GO:0071944	NA	NA	T	Signal transduction mechanisms	PF00001
pdam_00000853	0.109669	0.330298	0.507952	0.740843	0.191792	0.00763287	NA	NA	Upregulated	TRIM71	TRIM2: Tripartite motif-containing protein 2 (Bos taurus)	GO:0046872	GO:0000003,GO:0000082,GO:0000278,GO:0000932,GO:0001708,GO:0001838,GO:0001841,GO:0001843,GO:0002009,GO:0002119,GO:0002164,GO:0003674,GO:0003676,GO:0003723,GO:0003824,GO:0004842,GO:0005488,GO:0005515,GO:0005575,GO:0005622,GO:0005623,GO:0005737,GO:0005912,GO:0005924,GO:0005927,GO:0006139,GO:0006417,GO:0006464,GO:0006508,GO:0006511,GO:0006725,GO:0006807,GO:0006810,GO:0006897,GO:0006898,GO:0006915,GO:…	NA	K12035	O	Posttranslational modification, protein turnover, chaperones	PF00097
pdam_00000854	0.63552	0.307166	1.1318	0.540299	0.803578	0.0966413	NA	NA	NA	RCN3	RCN3: Reticulocalbin-3 (Homo sapiens)	GO:0005509	GO:0002119,GO:0002164,GO:0003674,GO:0005488,GO:0005509,GO:0005575,GO:0005622,GO:0005623,GO:0005737,GO:0005783,GO:0005788,GO:0007275,GO:0007568,GO:0008150,GO:0008340,GO:0009791,GO:0010259,GO:0018996,GO:0031974,GO:0032501,GO:0032502,GO:0040007,GO:0040011,GO:0042303,GO:0043167,GO:0043169,GO:0043226,GO:0043227,GO:0043229,GO:0043231,GO:0043233,GO:0044422,GO:0044424,GO:0044432,GO:0044444,GO:0044446,GO:…	NA	NA	T	Signal transduction mechanisms	PF13202, PF13499
pdam_00000855	0.420294	0.92773	1.69598	0.230843	0.000530684	1.03408e-12	NA	Upregulated	Upregulated	NA	calua: Calumenin-A (Salmo salar)	GO:0005509	NA	NA	NA	NA	NA	PF13202, PF13833
pdam_00000856	0.213743	-0.193498	-0.471763	0.548638	0.596488	0.0416494	NA	NA	Downregulated	HLTF	HLTF: Helicase-like transcription factor (Homo sapiens)	GO:0000209, GO:0005524, GO:0006301, GO:0006357, GO:0016887, GO:0061630	GO:0003674,GO:0003676,GO:0003677,GO:0005488,GO:0005575,GO:0005622,GO:0005623,GO:0005634,GO:0005737,GO:0006355,GO:0008150,GO:0009889,GO:0010468,GO:0010556,GO:0019219,GO:0019222,GO:0031323,GO:0031326,GO:0043226,GO:0043227,GO:0043229,GO:0043231,GO:0044424,GO:0044464,GO:0050789,GO:0050794,GO:0051171,GO:0051252,GO:0060255,GO:0065007,GO:0080090,GO:0097159,GO:1901363,GO:2000112,GO:2001141	K15505	K15173,K15711	K	Transcription	PF00176, PF00271, PF13923
pdam_00000858	-0.0716217	-0.0125775	0.274735	0.875091	NA	0.269014	NA	NA	NA	OSTF1	ostf1: Osteoclast-stimulating factor 1 (Xenopus laevis)	GO:0005515	GO:0000003,GO:0001503,GO:0003674,GO:0005488,GO:0005515,GO:0005575,GO:0005622,GO:0005623,GO:0005737,GO:0007154,GO:0007165,GO:0008150,GO:0009987,GO:0017124,GO:0019904,GO:0023052,GO:0032501,GO:0044424,GO:0044464,GO:0044699,GO:0044700,GO:0044707,GO:0044763,GO:0050789,GO:0050794,GO:0050896,GO:0051716,GO:0065007	NA	NA	T	Signal transduction mechanisms	PF00018, PF12796
pdam_00000860	0.281799	0.177324	0.178664	0.104408	0.328382	0.197054	NA	NA	NA	LINS	LINS1: Protein Lines homolog 1 (Homo sapiens)	GO:0005488	GO:0000578,GO:0003002,GO:0005575,GO:0005622,GO:0005623,GO:0005634,GO:0005737,GO:0006355,GO:0006357,GO:0007154,GO:0007165,GO:0007166,GO:0007167,GO:0007169,GO:0007275,GO:0007350,GO:0007351,GO:0007354,GO:0007362,GO:0007389,GO:0007424,GO:0007440,GO:0007442,GO:0007444,GO:0008150,GO:0008293,GO:0008544,GO:0008595,GO:0009653,GO:0009790,GO:0009798,GO:0009880,GO:0009888,GO:0009889,GO:0009891,GO:0009893,GO:…	NA	K04710	NA	NA	PF14694
pdam_00000861	0.0321208	0.322732	0.17598	0.935153	0.219018	0.410479	NA	NA	NA	MEF2A	MEF2A: Myocyte-specific enhancer factor 2A (Bos taurus)	GO:0000977, GO:0003677, GO:0045944, GO:0046983	GO:0000002,GO:0000003,GO:0000122,GO:0000165,GO:0000228,GO:0000768,GO:0000785,GO:0000790,GO:0000902,GO:0000904,GO:0000975,GO:0000976,GO:0000977,GO:0000978,GO:0000981,GO:0000982,GO:0000983,GO:0000987,GO:0000988,GO:0000989,GO:0001012,GO:0001046,GO:0001047,GO:0001067,GO:0001071,GO:0001076,GO:0001077,GO:0001104,GO:0001105,GO:0001159,GO:0001190,GO:0001228,GO:0001501,GO:0001503,GO:0001568,GO:0001649,GO:…	K09260	K04454,K09260,K09262,K09263,K09265	K	Transcription	PF00319, PF12347
pdam_00000864	0.698585	0.605149	0.906819	0.0761995	0.116155	0.00221454	NA	NA	Upregulated	SYT4	SYT7: Synaptotagmin-7 (Homo sapiens)	GO:0006887	GO:0001505,GO:0003001,GO:0003008,GO:0003674,GO:0005488,GO:0005509,GO:0005515,GO:0005543,GO:0005544,GO:0005575,GO:0005622,GO:0005623,GO:0005634,GO:0005737,GO:0005886,GO:0005887,GO:0006810,GO:0006836,GO:0006887,GO:0007154,GO:0007267,GO:0007268,GO:0007269,GO:0008021,GO:0008150,GO:0008289,GO:0009987,GO:0010646,GO:0012506,GO:0016020,GO:0016021,GO:0016023,GO:0016079,GO:0016192,GO:0017156,GO:0017157,GO:…	NA	K17287,K19904,K19911,K19914	NA	NA	PF00168
pdam_00000865	-0.537513	-0.0619973	0.409429	0.144464	0.910661	0.142319	NA	NA	NA	NA	SYT3: Synaptotagmin-3 (Homo sapiens)	NA	NA	NA	NA	NA	NA	PF00168
pdam_00000866	-0.0235277	0.151218	0.289124	0.909619	0.304447	0.00630055	NA	NA	Upregulated	DTWD2	DTWD2: DTW domain-containing protein 2 (Homo sapiens)	NA	NA	NA	NA	NA	NA	PF03942
pdam_00000868	0.284154	0.0636021	0.449102	0.13885	0.80939	0.00121591	NA	NA	Upregulated	DMXL2	DMXL2: DmX-like protein 2 (Homo sapiens)	GO:0005515	GO:0003674,GO:0005488,GO:0005515,GO:0005575,GO:0005622,GO:0005623,GO:0005634,GO:0005737,GO:0005768,GO:0005829,GO:0006461,GO:0006810,GO:0006873,GO:0006885,GO:0006950,GO:0007034,GO:0007035,GO:0007275,GO:0007424,GO:0008021,GO:0008150,GO:0008593,GO:0009636,GO:0009966,GO:0009987,GO:0010008,GO:0010035,GO:0010038,GO:0010043,GO:0010646,GO:0012505,GO:0012506,GO:0016020,GO:0016023,GO:0016043,GO:0016192,GO:…	K24155	NA	NA	NA	PF00400, PF12234
pdam_00000869	0.363856	0.289592	1.07681	0.469011	0.5835	0.00088194	NA	NA	Upregulated	PEX11A	Pex11a: Peroxisomal membrane protein 11A (Rattus norvegicus)	GO:0005779, GO:0016559	GO:0003674,GO:0005488,GO:0005515,GO:0005575,GO:0005622,GO:0005623,GO:0005737,GO:0005739,GO:0005777,GO:0005778,GO:0005779,GO:0005911,GO:0006461,GO:0006629,GO:0006996,GO:0007031,GO:0007154,GO:0007165,GO:0007623,GO:0008150,GO:0008152,GO:0009506,GO:0009507,GO:0009536,GO:0009987,GO:0016020,GO:0016021,GO:0016043,GO:0016557,GO:0016559,GO:0022607,GO:0023052,GO:0030054,GO:0030154,GO:0031090,GO:0031224,GO:…	K13352	K13351,K13352	U	Intracellular trafficking, secretion, and vesicular transport	PF05648
pdam_00000870	0.0778348	-0.0593865	0.0739228	0.768453	0.837872	0.669875	NA	NA	NA	WDR93	WDR93: WD repeat-containing protein 93 (Homo sapiens)	GO:0005515, GO:0016651, GO:0022900	NA	NA	NA	NA	NA	NA
pdam_00000873	0.0290094	0.000359626	-0.027239	0.893646	0.998863	0.835721	NA	NA	NA	KXD1	kxd1: KxDL motif-containing protein 1 (Danio rerio)	NA	GO:0003674,GO:0005488,GO:0005515,GO:0006810,GO:0007275,GO:0008150,GO:0009790,GO:0009792,GO:0016192,GO:0032501,GO:0032502,GO:0044699,GO:0044707,GO:0044767,GO:0048856,GO:0051179,GO:0051234	K20818	K02927	A	RNA processing and modification	PF10241
pdam_00000874	0.272778	-0.0558771	-0.0870013	0.237235	0.862007	0.644913	NA	NA	NA	FAN1	fan1: Fanconi-associated nuclease 1 (Danio rerio)	GO:0004518, GO:0005515, GO:0016788, GO:0036297	GO:0000287,GO:0000724,GO:0000725,GO:0003674,GO:0003824,GO:0004518,GO:0004519,GO:0004520,GO:0004527,GO:0004536,GO:0005488,GO:0005515,GO:0005575,GO:0005622,GO:0005623,GO:0005634,GO:0006139,GO:0006259,GO:0006281,GO:0006289,GO:0006302,GO:0006310,GO:0006725,GO:0006807,GO:0006950,GO:0006974,GO:0008150,GO:0008152,GO:0008409,GO:0009987,GO:0016787,GO:0016788,GO:0016888,GO:0016893,GO:0017108,GO:0032182,GO:…	K15363	K01265,K15363	L	Replication, recombination and repair	PF08774
pdam_00000875	0.0140399	0.0981977	0.474661	0.963872	0.695833	0.00142476	NA	NA	Upregulated	BRE-2	b3gnt5: Lactosylceramide 1%2C3-N-acetyl-beta-D-glucosaminyltransferase (Xenopus tropicalis)	GO:0006486, GO:0008378, GO:0016020	GO:0000139,GO:0003674,GO:0003824,GO:0005575,GO:0005622,GO:0005623,GO:0005737,GO:0005794,GO:0005795,GO:0008150,GO:0008152,GO:0008194,GO:0008376,GO:0008378,GO:0008499,GO:0009653,GO:0012505,GO:0016020,GO:0016740,GO:0016757,GO:0016758,GO:0031090,GO:0031984,GO:0031985,GO:0032502,GO:0032580,GO:0035250,GO:0043226,GO:0043227,GO:0043229,GO:0043231,GO:0044111,GO:0044115,GO:0044403,GO:0044419,GO:0044422,GO:…	NA	K00734,K07819,K07820,K09654,K09664	G	Carbohydrate transport and metabolism	PF01762
pdam_00000877	0.107311	0.194485	0.270482	0.744506	0.505454	0.173345	NA	NA	NA	SCNN1B	scnn1a: Amiloride-sensitive sodium channel subunit alpha (Neoceratodus forsteri)	GO:0005272, GO:0006814, GO:0016020	GO:0001101,GO:0001666,GO:0002009,GO:0002011,GO:0002028,GO:0003008,GO:0003674,GO:0005215,GO:0005216,GO:0005261,GO:0005272,GO:0005488,GO:0005515,GO:0005575,GO:0005623,GO:0005886,GO:0005887,GO:0006810,GO:0006811,GO:0006812,GO:0006814,GO:0006928,GO:0006950,GO:0007588,GO:0007610,GO:0007638,GO:0008150,GO:0008324,GO:0009605,GO:0009611,GO:0009612,GO:0009628,GO:0009653,GO:0009719,GO:0009888,GO:0009897,GO:…	K04824	K03440,K04824,K04825,K04827	P	Inorganic ion transport and metabolism	PF00858
pdam_00000878	-0.258319	-0.556472	-1.16813	0.471783	0.0533676	1.54881e-06	NA	NA	Downregulated	SCNN1G	scnn1a: Amiloride-sensitive sodium channel subunit alpha (Neoceratodus forsteri)	GO:0005272, GO:0006814, GO:0016020	GO:0001666,GO:0002009,GO:0002011,GO:0003008,GO:0003674,GO:0005215,GO:0005216,GO:0005261,GO:0005272,GO:0005575,GO:0005623,GO:0005886,GO:0005887,GO:0006810,GO:0006811,GO:0006812,GO:0006814,GO:0006928,GO:0006950,GO:0007588,GO:0007610,GO:0007638,GO:0008150,GO:0008324,GO:0009605,GO:0009611,GO:0009612,GO:0009628,GO:0009653,GO:0009888,GO:0009897,GO:0009986,GO:0009987,GO:0015075,GO:0015077,GO:0015081,GO:…	NA	K04824,K04827	P	Inorganic ion transport and metabolism	PF00858
pdam_00000881	-0.38016	-0.166377	-1.01269	0.332107	0.7189	0.000176021	NA	NA	Downregulated	SCNN1G	SCNN1A: Amiloride-sensitive sodium channel subunit alpha (Cavia porcellus)	GO:0005272, GO:0006814, GO:0016020	GO:0001666,GO:0002009,GO:0002011,GO:0003008,GO:0003674,GO:0005215,GO:0005216,GO:0005261,GO:0005272,GO:0005575,GO:0005623,GO:0005886,GO:0005887,GO:0006810,GO:0006811,GO:0006812,GO:0006814,GO:0006928,GO:0006950,GO:0007588,GO:0007610,GO:0007638,GO:0008150,GO:0008324,GO:0009605,GO:0009611,GO:0009612,GO:0009628,GO:0009653,GO:0009888,GO:0009897,GO:0009986,GO:0009987,GO:0015075,GO:0015077,GO:0015081,GO:…	K04824	K04824,K04827	P	Inorganic ion transport and metabolism	PF00858
pdam_00000888	0.322457	-0.269748	-0.216134	0.17199	0.260949	0.259288	NA	NA	NA	NA	unknown function	NA	NA	NA	NA	NA	NA	NA
pdam_00000889	0.241664	0.0066815	0.0186861	0.0982271	0.979766	0.887052	NA	NA	NA	HTATIP2	Htatip2: Oxidoreductase HTATIP2 (Mus musculus)	NA	GO:0000988,GO:0000989,GO:0003674,GO:0003712,GO:0003713,GO:0005575,GO:0005622,GO:0005623,GO:0005634,GO:0005635,GO:0005737,GO:0005739,GO:0005740,GO:0005741,GO:0005783,GO:0006355,GO:0006357,GO:0006810,GO:0006913,GO:0006917,GO:0008150,GO:0009889,GO:0009987,GO:0010468,GO:0010556,GO:0010941,GO:0010942,GO:0012502,GO:0012505,GO:0016020,GO:0016023,GO:0016482,GO:0019219,GO:0019222,GO:0019867,GO:0022603,GO:…	K17290	K17290	T	Signal transduction mechanisms	PF13460
pdam_00000890	-0.261596	-0.544708	-1.45559	0.466337	0.0626631	1.30192e-10	NA	NA	Downregulated	NR2F2	NR2F2: COUP transcription factor 2 (Bos taurus)	GO:0003677, GO:0003700, GO:0003707, GO:0004879, GO:0005634, GO:0006355, GO:0008270, GO:0043401, GO:0043565	GO:0000003,GO:0000079,GO:0000122,GO:0000975,GO:0000981,GO:0000982,GO:0000988,GO:0000989,GO:0001067,GO:0001071,GO:0001078,GO:0001227,GO:0001568,GO:0001654,GO:0001655,GO:0001700,GO:0001701,GO:0001709,GO:0001736,GO:0001738,GO:0001745,GO:0001751,GO:0001752,GO:0001754,GO:0001764,GO:0001890,GO:0001892,GO:0001893,GO:0001932,GO:0001933,GO:0001936,GO:0001937,GO:0001944,GO:0001945,GO:0001946,GO:0001972,GO:…	K08547	K08547,K08548,K08549,K08702,K14032	K	Transcription	PF00104, PF00105
pdam_00000891	0.13504	-0.282728	-0.302743	0.585307	0.169287	0.0641795	NA	NA	NA	NA	unknown function	NA	NA	NA	NA	NA	NA	NA
pdam_00000892	0.447338	0.0573692	0.792269	0.100661	0.888704	7.32299e-05	NA	NA	Upregulated	YPT1	ypt1: GTP-binding protein ypt1 (Schizosaccharomyces pombe (strain 972 / ATCC 24843))	GO:0003824, GO:0003924, GO:0005525, GO:0005975, GO:0016853, GO:0030246	GO:0000003,GO:0000131,GO:0000139,GO:0000149,GO:0000166,GO:0000282,GO:0000407,GO:0000902,GO:0000904,GO:0000910,GO:0001882,GO:0001883,GO:0003006,GO:0003674,GO:0003824,GO:0003924,GO:0005488,GO:0005515,GO:0005525,GO:0005575,GO:0005622,GO:0005623,GO:0005634,GO:0005737,GO:0005739,GO:0005740,GO:0005741,GO:0005773,GO:0005783,GO:0005789,GO:0005794,GO:0005795,GO:0005802,GO:0005811,GO:0005829,GO:0005856,GO:…	K01792	K07874	NA	NA	PF00071, PF01263
pdam_00000893	0.216004	-0.0763495	0.172952	0.39887	0.811825	0.359029	NA	NA	NA	UBL7	UBL7: Ubiquitin-like protein 7 (Homo sapiens)	GO:0005515	NA	NA	NA	O	Posttranslational modification, protein turnover, chaperones	PF00240, PF00627
pdam_00000894	0.0608609	-0.241341	-0.55717	0.74639	0.0765201	1.88578e-07	NA	NA	Downregulated	NA	Mum1: PWWP domain-containing protein MUM1 (Mus musculus)	NA	NA	NA	NA	NA	NA	PF00855
pdam_00000896	-0.00526002	-0.174381	-0.541878	0.992335	0.690326	0.0453814	NA	NA	Downregulated	NA	roco4: Probable serine/threonine-protein kinase roco4 (Dictyostelium discoideum)	GO:0005525, GO:0007264	NA	NA	NA	M	Cell wall/membrane/envelope biogenesis	PF08477, PF16095
pdam_00000897	0.205639	-0.109587	-0.0572253	0.220456	0.559286	0.676174	NA	NA	NA	CAPN6	CAPN5: Calpain-5 (Homo sapiens)	GO:0004198, GO:0005622, GO:0006508	GO:0000003,GO:0000226,GO:0001541,GO:0001553,GO:0001578,GO:0003006,GO:0003674,GO:0003824,GO:0004175,GO:0004197,GO:0004198,GO:0005488,GO:0005515,GO:0005575,GO:0005622,GO:0005623,GO:0005737,GO:0005819,GO:0005856,GO:0005874,GO:0005876,GO:0006508,GO:0006996,GO:0007010,GO:0007017,GO:0007154,GO:0007165,GO:0007275,GO:0007530,GO:0007538,GO:0007542,GO:0007548,GO:0008017,GO:0008092,GO:0008150,GO:0008152,GO:…	K08574	K08574,K08575,K08576	NA	NA	PF00168, PF00648, PF01067
pdam_00000898	-0.152864	-0.148121	-0.166418	0.42483	0.427639	0.216776	NA	NA	NA	ANKRD42	Ankrd42: Ankyrin repeat domain-containing protein 42 (Mus musculus)	GO:0005515	GO:0001817,GO:0001819,GO:0005575,GO:0005622,GO:0005623,GO:0005634,GO:0006355,GO:0008150,GO:0009889,GO:0010468,GO:0010556,GO:0019219,GO:0019222,GO:0031323,GO:0031326,GO:0031347,GO:0032101,GO:0043226,GO:0043227,GO:0043229,GO:0043231,GO:0044093,GO:0044424,GO:0044464,GO:0048518,GO:0048583,GO:0050727,GO:0050789,GO:0050794,GO:0051090,GO:0051091,GO:0051092,GO:0051171,GO:0051239,GO:0051240,GO:0051252,GO:…	K17593	K10380,K17593	O	Posttranslational modification, protein turnover, chaperones	PF12796, PF13857
pdam_00000914	0.198257	0.306633	0.941372	0.389417	0.126799	2.88583e-10	NA	NA	Upregulated	ACADVL	Acadvl: Very long-chain specific acyl-CoA dehydrogenase%2C mitochondrial (Mus musculus)	GO:0003995, GO:0008152, GO:0016627, GO:0050660, GO:0055114	GO:0000038,GO:0000062,GO:0000166,GO:0001659,GO:0001932,GO:0001934,GO:0003674,GO:0003824,GO:0003995,GO:0004466,GO:0005488,GO:0005575,GO:0005622,GO:0005623,GO:0005737,GO:0005739,GO:0005740,GO:0005743,GO:0005759,GO:0005811,GO:0005856,GO:0005875,GO:0006082,GO:0006091,GO:0006629,GO:0006631,GO:0006635,GO:0006950,GO:0006984,GO:0006986,GO:0006987,GO:0007154,GO:0007165,GO:0007275,GO:0008150,GO:0008152,GO:…	K09479	K09479,K15980	I	Lipid transport and metabolism	PF00441, PF02770, PF02771
pdam_00000919	-1.39868	-0.750052	-1.82784	0.00879663	0.203906	2.46615e-05	Downregulated	NA	Downregulated	CTRL	CTRB2: Chymotrypsinogen B2 (Homo sapiens)	GO:0004252, GO:0006508	GO:0000323,GO:0003674,GO:0003824,GO:0004175,GO:0004252,GO:0005575,GO:0005576,GO:0005615,GO:0005622,GO:0005623,GO:0005737,GO:0005764,GO:0005773,GO:0006508,GO:0007584,GO:0007586,GO:0008150,GO:0008152,GO:0008233,GO:0008236,GO:0009056,GO:0009057,GO:0009605,GO:0009636,GO:0009719,GO:0009725,GO:0009987,GO:0009991,GO:0010033,GO:0010243,GO:0010941,GO:0010942,GO:0016043,GO:0016787,GO:0017171,GO:0019538,GO:…	K01310	K01310,K01312,K09632	E	Amino acid transport and metabolism	PF00089
pdam_00000922	-0.475785	-0.973636	-1.05209	0.257284	0.00332299	0.000385625	NA	Downregulated	Downregulated	MGAT4C	MGAT4C: Alpha-1%2C3-mannosyl-glycoprotein 4-beta-N-acetylglucosaminyltransferase C (Sus scrofa)	GO:0005975, GO:0016020, GO:0016758	GO:0000139,GO:0005575,GO:0005622,GO:0005623,GO:0005737,GO:0005794,GO:0005975,GO:0006464,GO:0006486,GO:0006487,GO:0008150,GO:0008152,GO:0009058,GO:0009059,GO:0009100,GO:0009101,GO:0009987,GO:0012505,GO:0016020,GO:0018193,GO:0018196,GO:0018279,GO:0019538,GO:0031090,GO:0034645,GO:0036211,GO:0043170,GO:0043226,GO:0043227,GO:0043229,GO:0043231,GO:0043412,GO:0043413,GO:0043687,GO:0044237,GO:0044238,GO:…	K13748	K13748	G	Carbohydrate transport and metabolism	PF04666
pdam_00000923	0.263789	-0.0946618	0.264598	0.382759	0.804458	0.221111	NA	NA	NA	GPX4	GPX1: Glutathione peroxidase (Schistosoma mansoni)	GO:0004602, GO:0006979, GO:0055114	GO:0000003,GO:0000302,GO:0000303,GO:0002119,GO:0002164,GO:0003674,GO:0003824,GO:0004601,GO:0004602,GO:0005488,GO:0005575,GO:0005622,GO:0005623,GO:0005634,GO:0005635,GO:0005737,GO:0005739,GO:0005740,GO:0005741,GO:0005743,GO:0005758,GO:0005777,GO:0005782,GO:0005829,GO:0006082,GO:0006325,GO:0006518,GO:0006520,GO:0006575,GO:0006629,GO:0006644,GO:0006749,GO:0006790,GO:0006793,GO:0006796,GO:0006801,GO:…	K00432	K00432,K05361	O	Posttranslational modification, protein turnover, chaperones	PF00255
pdam_00000924	-0.186356	-0.0483119	0.211821	0.439694	0.878701	0.203968	NA	NA	NA	XRRA1	Xrra1: X-ray radiation resistance-associated protein 1 (Mus musculus)	GO:0005515	GO:0003674,GO:0004871,GO:0004872,GO:0004888,GO:0005575,GO:0005622,GO:0005623,GO:0005634,GO:0005737,GO:0007154,GO:0007165,GO:0008150,GO:0009314,GO:0009628,GO:0009987,GO:0010165,GO:0010212,GO:0023052,GO:0038023,GO:0043226,GO:0043227,GO:0043229,GO:0043231,GO:0044424,GO:0044464,GO:0044699,GO:0044700,GO:0044763,GO:0050789,GO:0050794,GO:0050896,GO:0051716,GO:0060089,GO:0065007	NA	NA	T	Signal transduction mechanisms	PF12799
pdam_00000925	0.505015	0.0943403	0.87439	0.0233416	0.77129	3.98027e-07	Upregulated	NA	Upregulated	OSI_10950	dapk-1: Death-associated protein kinase dapk-1 (Caenorhabditis elegans)	GO:0005515, GO:0007165	NA	NA	K08803	NA	NA	PF12796, PF16095
pdam_00000926	0.10707	-0.0864812	-0.419347	0.745772	0.807022	0.0320615	NA	NA	Downregulated	MGAT4C	MGAT4C: Alpha-1%2C3-mannosyl-glycoprotein 4-beta-N-acetylglucosaminyltransferase C (Gallus gallus)	GO:0005975, GO:0016020, GO:0016758	GO:0000139,GO:0005575,GO:0005622,GO:0005623,GO:0005737,GO:0005794,GO:0005975,GO:0006464,GO:0006486,GO:0006487,GO:0008150,GO:0008152,GO:0009058,GO:0009059,GO:0009100,GO:0009101,GO:0009987,GO:0012505,GO:0016020,GO:0018193,GO:0018196,GO:0018279,GO:0019538,GO:0031090,GO:0034645,GO:0036211,GO:0043170,GO:0043226,GO:0043227,GO:0043229,GO:0043231,GO:0043412,GO:0043413,GO:0043687,GO:0044237,GO:0044238,GO:…	K13748	K13748	G	Carbohydrate transport and metabolism	PF04666
pdam_00000931	0.242384	-0.10268	-0.000239339	0.409445	NA	0.999299	NA	NA	NA	NA	unknown function	NA	NA	NA	NA	NA	NA	NA
pdam_00000932	0.271882	-0.267204	-0.126869	0.0980941	0.0877816	0.345705	NA	NA	NA	ABCC1	ABCC1: Multidrug resistance-associated protein 1 (Gallus gallus)	GO:0005524, GO:0005887, GO:0006810, GO:0008514, GO:0016021, GO:0016887, GO:0042626, GO:0055085	GO:0000041,GO:0000166,GO:0000322,GO:0000323,GO:0000324,GO:0000329,GO:0001882,GO:0001883,GO:0002119,GO:0002164,GO:0002237,GO:0003333,GO:0003674,GO:0003824,GO:0004409,GO:0005215,GO:0005216,GO:0005217,GO:0005224,GO:0005253,GO:0005254,GO:0005260,GO:0005310,GO:0005319,GO:0005324,GO:0005342,GO:0005488,GO:0005515,GO:0005524,GO:0005575,GO:0005622,GO:0005623,GO:0005634,GO:0005737,GO:0005768,GO:0005769,GO:…	NA	K02021,K05031,K05665,K05666,K05667,K05669	Q	Secondary metabolites biosynthesis, transport and catabolism	PF00005, PF00664
pdam_00000934	0.0874093	0.00652386	0.00235913	0.502162	0.973774	0.982469	NA	NA	NA	UVRAG	Uvrag: UV radiation resistance associated protein (Mus musculus)	GO:0010508	GO:0000003,GO:0000322,GO:0000323,GO:0000324,GO:0000329,GO:0000407,GO:0002165,GO:0003006,GO:0005575,GO:0005622,GO:0005623,GO:0005737,GO:0005764,GO:0005768,GO:0005769,GO:0005770,GO:0005773,GO:0005774,GO:0005829,GO:0005942,GO:0006139,GO:0006259,GO:0006281,GO:0006508,GO:0006511,GO:0006605,GO:0006623,GO:0006725,GO:0006807,GO:0006810,GO:0006886,GO:0006914,GO:0006950,GO:0006974,GO:0007034,GO:0007154,GO:…	K21249	NA	NA	NA	PF10186
pdam_00000935	-0.03486	-0.158753	-0.209098	0.83491	0.184818	0.0232818	NA	NA	Downregulated	MED14	MED14: Mediator of RNA polymerase II transcription subunit 14 (Aedes aegypti)	GO:0001104, GO:0006357, GO:0016592	GO:0000003,GO:0000122,GO:0000428,GO:0000988,GO:0000989,GO:0001076,GO:0001085,GO:0001103,GO:0001104,GO:0002119,GO:0002164,GO:0003674,GO:0003712,GO:0003713,GO:0004872,GO:0005102,GO:0005488,GO:0005515,GO:0005575,GO:0005622,GO:0005623,GO:0005634,GO:0005654,GO:0005737,GO:0005829,GO:0005886,GO:0006139,GO:0006351,GO:0006352,GO:0006355,GO:0006357,GO:0006366,GO:0006367,GO:0006725,GO:0006807,GO:0007154,GO:…	K15156	K15156	K	Transcription	PF08638
pdam_00000937	-0.400617	-0.261214	-0.965963	0.372158	0.593632	0.00142562	NA	NA	Downregulated	NA	eprA1: Extracellular protease (Aeromonas hydrophila)	GO:0004222, GO:0008237	NA	NA	K08646	NA	NA	PF14521
pdam_00000941	0.173144	0.163196	0.12113	0.459702	0.4858	0.47882	NA	NA	NA	UGGT2	Uggt1: UDP-glucose:glycoprotein glucosyltransferase 1 (Mus musculus)	GO:0003980, GO:0006486	GO:0000003,GO:0000271,GO:0003006,GO:0003674,GO:0003824,GO:0003980,GO:0005488,GO:0005509,GO:0005515,GO:0005537,GO:0005575,GO:0005622,GO:0005623,GO:0005634,GO:0005635,GO:0005737,GO:0005783,GO:0005788,GO:0005791,GO:0005793,GO:0005975,GO:0005976,GO:0006011,GO:0006073,GO:0006077,GO:0006078,GO:0006139,GO:0006457,GO:0006458,GO:0006464,GO:0006486,GO:0006487,GO:0006725,GO:0006753,GO:0006793,GO:0006796,GO:…	K11718	K11718	G	Carbohydrate transport and metabolism	PF06427
pdam_00000944	0.0360812	-0.0256655	0.208532	0.773198	0.851811	0.0031988	NA	NA	Upregulated	NA	unknown function	NA	NA	NA	NA	NA	NA	NA
pdam_00000945	0.859606	1.70314	2.38964	0.131935	7.83791e-05	1.53429e-09	NA	Upregulated	Upregulated	DMRTA1	dmrta2: Doublesex- and mab-3-related transcription factor A2 (Xenopus tropicalis)	GO:0003700, GO:0005515, GO:0005634, GO:0006355, GO:0043565	GO:0000003,GO:0001541,GO:0002009,GO:0003006,GO:0003674,GO:0003676,GO:0003677,GO:0005488,GO:0005515,GO:0005575,GO:0005622,GO:0005623,GO:0005634,GO:0006810,GO:0006897,GO:0006898,GO:0007275,GO:0007548,GO:0007610,GO:0007617,GO:0007618,GO:0008150,GO:0008406,GO:0008585,GO:0009653,GO:0009888,GO:0016192,GO:0018991,GO:0018996,GO:0019098,GO:0022414,GO:0022602,GO:0032501,GO:0032502,GO:0032504,GO:0033057,GO:…	NA	K19491	K	Transcription	PF00751, PF03474
pdam_00000946	0.308977	0.281721	0.803569	0.10057	0.119838	3.09414e-09	NA	NA	Upregulated	RRAGB	Rraga: Ras-related GTP-binding protein A (Rattus norvegicus)	GO:0005525	GO:0000003,GO:0000166,GO:0000322,GO:0000323,GO:0000324,GO:0000329,GO:0001101,GO:0001558,GO:0001882,GO:0001883,GO:0003674,GO:0003824,GO:0003924,GO:0005488,GO:0005515,GO:0005525,GO:0005575,GO:0005622,GO:0005623,GO:0005634,GO:0005737,GO:0005764,GO:0005768,GO:0005770,GO:0005773,GO:0005774,GO:0005794,GO:0005829,GO:0006139,GO:0006152,GO:0006163,GO:0006184,GO:0006195,GO:0006342,GO:0006348,GO:0006351,GO:…	K16185	K16185	U	Intracellular trafficking, secretion, and vesicular transport	PF04670
pdam_00000947	-0.171144	-0.0492802	0.0894049	0.259313	0.801994	0.44548	NA	NA	NA	NCEH1	AADAC: Arylacetamide deacetylase (Oryctolagus cuniculus)	GO:0003676, GO:0008152, GO:0016787	GO:0000003,GO:0003674,GO:0003824,GO:0005488,GO:0005575,GO:0006464,GO:0006470,GO:0006793,GO:0006796,GO:0006805,GO:0006915,GO:0007275,GO:0007610,GO:0008150,GO:0008152,GO:0008219,GO:0009410,GO:0009790,GO:0009792,GO:0009987,GO:0012501,GO:0016020,GO:0016265,GO:0016311,GO:0016787,GO:0017171,GO:0018991,GO:0019098,GO:0019538,GO:0022414,GO:0032501,GO:0032502,GO:0032504,GO:0033057,GO:0036211,GO:0042221,GO:…	K14350	K13616,K14349,K17680	V	Defense mechanisms	PF03467, PF07859
pdam_00000949	0.404689	0.482246	0.774806	0.0508718	0.0081293	5.2085e-07	NA	Upregulated	Upregulated	AADACL4	Aadacl4: Arylacetamide deacetylase-like 4 (Mus musculus)	GO:0008152, GO:0016787	GO:0000003,GO:0005575,GO:0006915,GO:0007275,GO:0007610,GO:0008150,GO:0008219,GO:0009790,GO:0009792,GO:0009987,GO:0012501,GO:0016020,GO:0016265,GO:0018991,GO:0019098,GO:0022414,GO:0032501,GO:0032502,GO:0032504,GO:0033057,GO:0044699,GO:0044706,GO:0044707,GO:0044763,GO:0044767,GO:0048609,GO:0048856,GO:0050896,GO:0051704	NA	K13616,K14349,K14351,K17680	V	Defense mechanisms	PF07859
pdam_00000953	-0.0482518	-0.0968219	0.0103085	0.772155	0.505784	0.930768	NA	NA	NA	BRCC3	brcc3: Lys-63-specific deubiquitinase BRCC36 (Xenopus tropicalis)	GO:0004843, GO:0005515, GO:0006281, GO:0070531, GO:0070536, GO:0070552	GO:0000075,GO:0000077,GO:0000151,GO:0000152,GO:0003674,GO:0003824,GO:0004221,GO:0004843,GO:0005488,GO:0005515,GO:0005575,GO:0005622,GO:0005623,GO:0005634,GO:0006139,GO:0006259,GO:0006281,GO:0006282,GO:0006302,GO:0006310,GO:0006325,GO:0006464,GO:0006725,GO:0006807,GO:0006950,GO:0006974,GO:0006996,GO:0008150,GO:0008152,GO:0008233,GO:0008234,GO:0008237,GO:0009314,GO:0009628,GO:0009893,GO:0009987,GO:…	K11864	K00901,K11864	O	Posttranslational modification, protein turnover, chaperones	PF013982
pdam_00000954	0.0237502	0.0740101	0.852572	0.949606	0.822451	3.4529e-07	NA	NA	Upregulated	NA	AWAT1: Acyl-CoA wax alcohol acyltransferase 1 (Homo sapiens)	GO:0016747	NA	NA	K14457,K14458	NA	NA	PF03982
pdam_00000956	-0.180861	-0.0292284	0.207114	0.233766	0.889726	0.05511	NA	NA	NA	NA	dgat2: Diacylglycerol O-acyltransferase 2 (Danio rerio)	GO:0016747	NA	NA	NA	NA	NA	PF03982
pdam_00000958	-0.0154287	0.0869733	0.342849	0.959877	0.73465	0.0205286	NA	NA	Upregulated	RHBDD1	RHBDD1: Rhomboid-related protein 4 (Homo sapiens)	GO:0004252, GO:0016021	GO:0000003,GO:0003006,GO:0003674,GO:0003824,GO:0004175,GO:0004252,GO:0005575,GO:0005622,GO:0005623,GO:0005737,GO:0005739,GO:0005783,GO:0005789,GO:0005886,GO:0006464,GO:0006508,GO:0006511,GO:0006950,GO:0006986,GO:0007276,GO:0007283,GO:0008150,GO:0008152,GO:0008233,GO:0008236,GO:0009056,GO:0009057,GO:0009314,GO:0009411,GO:0009416,GO:0009628,GO:0009893,GO:0009894,GO:0009896,GO:0009987,GO:0010033,GO:…	K09651	K09651	T	Signal transduction mechanisms	PF01694
pdam_00000959	0.084416	-0.343675	-0.649612	0.768453	0.102063	8.24535e-05	NA	NA	Downregulated	XRCC1	Xrcc1: DNA repair protein XRCC1 (Mus musculus)	GO:0000012, GO:0003684, GO:0005634	GO:0001666,GO:0003674,GO:0003676,GO:0003677,GO:0003690,GO:0005488,GO:0005575,GO:0005622,GO:0005623,GO:0005634,GO:0005654,GO:0006139,GO:0006259,GO:0006266,GO:0006281,GO:0006284,GO:0006285,GO:0006289,GO:0006304,GO:0006308,GO:0006725,GO:0006807,GO:0006950,GO:0006974,GO:0007154,GO:0007267,GO:0007275,GO:0007399,GO:0007417,GO:0007420,GO:0008150,GO:0008152,GO:0009056,GO:0009057,GO:0009628,GO:0009987,GO:…	K10803	K00670,K10803	L	Replication, recombination and repair	PF01834, PF12738, PF16589
pdam_00000960	0.0953433	0.0786521	0.5707	0.884565	0.909742	0.0987757	NA	NA	NA	FG05738.1	tatD: 3'-5' ssDNA/RNA exonuclease TatD (Edwardsiella tarda (strain EIB202))	GO:0003676, GO:0016788	GO:0000737,GO:0003674,GO:0003824,GO:0004518,GO:0004519,GO:0004527,GO:0004529,GO:0004536,GO:0005575,GO:0005622,GO:0005623,GO:0005634,GO:0005737,GO:0005829,GO:0006139,GO:0006259,GO:0006308,GO:0006309,GO:0006725,GO:0006807,GO:0006810,GO:0006897,GO:0006909,GO:0006915,GO:0006921,GO:0006950,GO:0006979,GO:0008150,GO:0008152,GO:0008219,GO:0008296,GO:0008408,GO:0009056,GO:0009057,GO:0009987,GO:0012501,GO:…	K03424	K03424	L	Replication, recombination and repair	PF01026
pdam_00000962	-0.221571	-0.197278	-0.339061	0.0844374	0.113346	0.000401423	NA	NA	Downregulated	U2SURP	U2SURP: U2 snRNP-associated SURP motif-containing protein (Homo sapiens)	GO:0003676, GO:0003723, GO:0006396	GO:0000375,GO:0000377,GO:0000398,GO:0003674,GO:0003676,GO:0003723,GO:0003729,GO:0005488,GO:0005575,GO:0005622,GO:0005623,GO:0005634,GO:0005686,GO:0005737,GO:0005829,GO:0006139,GO:0006396,GO:0006397,GO:0006725,GO:0006807,GO:0007275,GO:0008150,GO:0008152,GO:0008380,GO:0009790,GO:0009792,GO:0009987,GO:0010467,GO:0016070,GO:0016071,GO:0030529,GO:0030532,GO:0032501,GO:0032502,GO:0032991,GO:0034641,GO:…	K12842	K12842	A	RNA processing and modification	PF00076, PF01805, PF083125
pdam_00000963	0.0165253	-0.285468	-0.495299	0.950182	0.065626	6.95199e-05	NA	NA	Downregulated	FBXL18	FBXL18: F-box/LRR-repeat protein 18 (Homo sapiens)	GO:0005515	NA	K10284	K10284	NA	NA	PF12937
pdam_00000964	0.142214	0.0921281	0.3101	0.449116	0.647712	0.0118493	NA	NA	Upregulated	WRAP53	Wrap53: Telomerase Cajal body protein 1 (Mus musculus)	GO:0005515	GO:0000166,GO:0003674,GO:0003676,GO:0003723,GO:0005488,GO:0005575,GO:0005622,GO:0005623,GO:0005634,GO:0005654,GO:0005697,GO:0005730,GO:0005737,GO:0005829,GO:0005834,GO:0005886,GO:0006139,GO:0006259,GO:0006725,GO:0006807,GO:0006996,GO:0007154,GO:0007165,GO:0008150,GO:0008152,GO:0008277,GO:0009898,GO:0009966,GO:0009968,GO:0009987,GO:0010646,GO:0010648,GO:0010969,GO:0015030,GO:0016020,GO:0016043,GO:…	K23314	K15361	NA	NA	PF00400
pdam_00000965	0.0698485	0.123186	0.277317	0.677733	0.395893	0.00510828	NA	NA	Upregulated	EIF2A	eif2a: Eukaryotic translation initiation factor 2A (Xenopus laevis)	GO:0003743, GO:0005515, GO:0006413	GO:0000049,GO:0002181,GO:0002183,GO:0003674,GO:0003676,GO:0003723,GO:0003743,GO:0005488,GO:0005575,GO:0005622,GO:0005623,GO:0005737,GO:0005829,GO:0005840,GO:0005850,GO:0005886,GO:0006355,GO:0006357,GO:0006412,GO:0006413,GO:0006417,GO:0006464,GO:0006468,GO:0006793,GO:0006796,GO:0006950,GO:0006984,GO:0006991,GO:0006996,GO:0007154,GO:0007165,GO:0007275,GO:0008135,GO:0008150,GO:0008152,GO:0009058,GO:…	K15026	K15026,K15076	J	Translation, ribosomal structure and biogenesis	PF08662
pdam_00000966	0.10168	0.194769	0.313565	0.721798	0.422596	0.0625767	NA	NA	NA	SPRYD7	SPRYD7: SPRY domain-containing protein 7 (Homo sapiens)	GO:0005515	NA	NA	NA	NA	NA	PF00622
pdam_00000967	0.00526878	-0.0419392	-0.0181724	0.984172	0.864507	0.90615	NA	NA	NA	PEX1	PEX1: Peroxisome biogenesis factor 1 (Homo sapiens)	GO:0005524, GO:0005777, GO:0005778, GO:0006625, GO:0007031, GO:0042623	GO:0000003,GO:0000166,GO:0001881,GO:0001882,GO:0001883,GO:0003674,GO:0003824,GO:0005488,GO:0005515,GO:0005524,GO:0005575,GO:0005622,GO:0005623,GO:0005634,GO:0005694,GO:0005737,GO:0005777,GO:0005778,GO:0005783,GO:0005829,GO:0005975,GO:0006082,GO:0006139,GO:0006152,GO:0006163,GO:0006195,GO:0006200,GO:0006259,GO:0006281,GO:0006301,GO:0006302,GO:0006464,GO:0006486,GO:0006487,GO:0006508,GO:0006511,GO:…	K13338	K13338	O	Posttranslational modification, protein turnover, chaperones	PF00004, PF09262, PF09263
pdam_00000968	-0.668731	-0.217763	-0.238958	0.084105	0.651405	0.459692	NA	NA	NA	TUB2	TUBB4B: Tubulin beta-4B chain (Fragments) (Mesocricetus auratus)	GO:0003924, GO:0005200, GO:0005525, GO:0005874, GO:0007017	GO:0000003,GO:0000070,GO:0000166,GO:0000226,GO:0000235,GO:0000278,GO:0000280,GO:0000743,GO:0000746,GO:0000747,GO:0000819,GO:0000922,GO:0001882,GO:0001883,GO:0002009,GO:0002119,GO:0002164,GO:0003006,GO:0003008,GO:0003674,GO:0005198,GO:0005200,GO:0005488,GO:0005525,GO:0005575,GO:0005622,GO:0005623,GO:0005634,GO:0005737,GO:0005815,GO:0005816,GO:0005818,GO:0005819,GO:0005827,GO:0005828,GO:0005829,GO:…	NA	K07375	Z	Cytoskeleton	PF00091
pdam_00000969	0.115564	0.0855427	0.0753493	0.712098	0.798524	0.721288	NA	NA	NA	PCID2	PCID2: PCI domain-containing protein 2 (Homo sapiens)	GO:0005515	GO:0000003,GO:0000160,GO:0000338,GO:0000375,GO:0000377,GO:0000398,GO:0000746,GO:0000747,GO:0000749,GO:0000754,GO:0002119,GO:0002164,GO:0002376,GO:0002520,GO:0002682,GO:0002684,GO:0002694,GO:0002696,GO:0003674,GO:0003824,GO:0004620,GO:0004623,GO:0005575,GO:0005622,GO:0005623,GO:0005634,GO:0005737,GO:0005829,GO:0006139,GO:0006355,GO:0006396,GO:0006397,GO:0006403,GO:0006405,GO:0006406,GO:0006464,GO:…	NA	NA	D	Cell cycle control, cell division, chromosome partitioning	PF01399
pdam_00000972	-1.81012	-1.56885	-3.33361	0.0343495	0.062437	3.92313e-07	Downregulated	NA	Downregulated	NA	unknown function	NA	NA	NA	NA	NA	NA	PF00030
pdam_00000973	0.516363	0.444492	-0.160574	0.590846	0.652346	0.819816	NA	NA	NA	NA	unknown function	NA	NA	NA	NA	NA	NA	NA
pdam_00000976	0.0979211	0.10261	0.260944	0.741214	0.732591	0.143678	NA	NA	NA	ERG	Erg: Transcriptional regulator ERG (Mus musculus)	GO:0003700, GO:0005634, GO:0006355, GO:0043565	GO:0000003,GO:0000902,GO:0000904,GO:0000975,GO:0000976,GO:0000977,GO:0000980,GO:0001012,GO:0001067,GO:0001071,GO:0001158,GO:0001525,GO:0001568,GO:0001704,GO:0001707,GO:0001944,GO:0002119,GO:0002164,GO:0002376,GO:0002520,GO:0003008,GO:0003013,GO:0003674,GO:0003676,GO:0003677,GO:0003682,GO:0003700,GO:0004871,GO:0005488,GO:0005575,GO:0005622,GO:0005623,GO:0005634,GO:0005737,GO:0006355,GO:0006357,GO:…	K09435	K09435,K09436,K09443	K	Transcription	PF00178, PF02198
pdam_00000977	-0.0249921	-0.0759773	0.0395075	0.900287	0.649019	0.739061	NA	NA	NA	TBRG1	Tbrg1: Transforming growth factor beta regulator 1 (Rattus norvegicus)	GO:0005634	GO:0005575,GO:0005622,GO:0005623,GO:0005634,GO:0006139,GO:0006259,GO:0006260,GO:0006725,GO:0006807,GO:0006810,GO:0007049,GO:0007050,GO:0007275,GO:0007399,GO:0008150,GO:0008152,GO:0008285,GO:0009058,GO:0009059,GO:0009987,GO:0010468,GO:0010608,GO:0019222,GO:0022008,GO:0022402,GO:0030154,GO:0031647,GO:0032066,GO:0032501,GO:0032502,GO:0034641,GO:0034645,GO:0042127,GO:0043170,GO:0043226,GO:0043227,GO:…	NA	NA	K	Transcription	PF05964, PF05965
pdam_00000978	0.148179	0.251888	0.528565	0.576669	0.271361	0.00123618	NA	NA	Upregulated	NA	Slc16a10: Monocarboxylate transporter 10 (Rattus norvegicus)	GO:0016021, GO:0055085	GO:0003674,GO:0005215,GO:0005575,GO:0005622,GO:0005623,GO:0005737,GO:0005739,GO:0005783,GO:0006810,GO:0008150,GO:0016020,GO:0016021,GO:0031224,GO:0043226,GO:0043227,GO:0043229,GO:0043231,GO:0044424,GO:0044425,GO:0044444,GO:0044464,GO:0051179,GO:0051234	K08187	K08183	G	Carbohydrate transport and metabolism	PF076903
pdam_00000979	0.0662118	-0.263871	-0.454502	0.846401	0.308308	0.0159678	NA	NA	Downregulated	CEP63	cep63: Centrosomal protein of 63 kDa (Danio rerio)	NA	GO:0000075,GO:0000077,GO:0000086,GO:0000226,GO:0000278,GO:0000922,GO:0005575,GO:0005622,GO:0005623,GO:0005737,GO:0005813,GO:0005815,GO:0005819,GO:0005829,GO:0005856,GO:0006461,GO:0006950,GO:0006974,GO:0006996,GO:0007010,GO:0007017,GO:0007049,GO:0007051,GO:0007154,GO:0007165,GO:0008150,GO:0009987,GO:0010564,GO:0010948,GO:0015630,GO:0016043,GO:0022402,GO:0022607,GO:0023052,GO:0031570,GO:0032991,GO:…	K16763	K16763	Z	Cytoskeleton	PF17045
pdam_00000980	-0.0275746	-0.0826286	-0.118887	0.898205	0.646693	0.319995	NA	NA	NA	NA	unknown function	NA	NA	NA	NA	NA	NA	NA
pdam_00000982	0.0459472	-0.051057	-0.00523265	0.844157	0.830742	0.973878	NA	NA	NA	ZNHIT1	Znhit1: Zinc finger HIT domain-containing protein 1 (Mus musculus)	GO:0003824	GO:0000122,GO:0000228,GO:0000785,GO:0000790,GO:0000812,GO:0000902,GO:0002682,GO:0002694,GO:0003674,GO:0003682,GO:0005488,GO:0005575,GO:0005622,GO:0005623,GO:0005634,GO:0005694,GO:0005700,GO:0005737,GO:0006325,GO:0006338,GO:0006355,GO:0006357,GO:0006605,GO:0006623,GO:0006810,GO:0006886,GO:0006950,GO:0006952,GO:0006996,GO:0007034,GO:0007275,GO:0007399,GO:0008104,GO:0008150,GO:0009607,GO:0009617,GO:…	K11663	K11663	NA	NA	NA
pdam_00000983	-0.0958657	-0.0760199	-0.532039	0.769916	0.830074	0.00535458	NA	NA	Downregulated	NA	unknown function	GO:0004672, GO:0005524, GO:0006468	NA	NA	NA	T	Signal transduction mechanisms	PF00350, PF07714
pdam_00000988	0.401747	-0.0213937	0.138224	0.157182	0.965973	0.561002	NA	NA	NA	NA	unknown function	NA	NA	NA	NA	NA	NA	NA
pdam_00000991	-0.2422	-0.124998	-0.547622	0.314854	0.64665	0.000955568	NA	NA	Downregulated	NA	STY46: Serine/threonine-protein kinase STY46 (Arabidopsis thaliana)	GO:0004672, GO:0005524, GO:0006468	NA	NA	K01292,K01294	E	Amino acid transport and metabolism	PF00350, PF07714
pdam_00000992	-0.180697	-0.144961	-0.574148	0.576437	0.666169	0.00445331	NA	NA	Downregulated	NA	shkA: Dual specificity protein kinase shkA (Dictyostelium discoideum)	GO:0004672, GO:0005524, GO:0006468	NA	NA	NA	T	Signal transduction mechanisms	PF00069, PF00350, PF07714
pdam_00000993	-0.0883319	-0.0713758	-0.107595	0.781183	0.834435	0.604671	NA	NA	NA	ROCO6	STY46: Serine/threonine-protein kinase STY46 (Arabidopsis thaliana)	GO:0004672, GO:0005524, GO:0006468	GO:0005575,GO:0016020	NA	NA	T	Signal transduction mechanisms	PF00069
pdam_00000998	-0.250593	-0.467946	-1.44716	0.38226	0.0491799	1.12918e-13	NA	Downregulated	Downregulated	NA	shkA: Dual specificity protein kinase shkA (Dictyostelium discoideum)	GO:0004672, GO:0005524, GO:0006468	NA	NA	NA	T	Signal transduction mechanisms	PF07714
pdam_00001001	-0.452258	0.520149	2.48373	0.727187	0.680188	0.000784799	NA	NA	Upregulated	NA	ADAMTS7: A disintegrin and metalloproteinase with thrombospondin motifs 7 (Homo sapiens)	GO:0004222, GO:0005509, GO:0006508, GO:0008237, GO:0008270	NA	NA	NA	NA	NA	PF00008, PF00090, PF01562, PF01822, PF05986
pdam_00001002	0.449677	0.939006	3.59285	0.76427	0.473243	1.87553e-05	NA	NA	Upregulated	NA	ADAMTS7: A disintegrin and metalloproteinase with thrombospondin motifs 7 (Homo sapiens)	GO:0004222, GO:0006508, GO:0008237, GO:0008270	NA	NA	NA	NA	NA	PF01562, PF01822, PF13582
pdam_00001003	-0.393456	-0.139788	-0.414627	0.370252	0.800255	0.186214	NA	NA	NA	NA	ADAMTS6: A disintegrin and metalloproteinase with thrombospondin motifs 6 (Homo sapiens)	GO:0003951, GO:0004222, GO:0006508, GO:0008152, GO:0008237, GO:0008270	NA	NA	NA	NA	NA	PF00090, PF01421, PF01562, PF05986, PF13688
pdam_00001004	0.0334674	0.0635271	-0.0311625	0.83329	0.655226	0.758736	NA	NA	NA	FNDC3A	Fndc3a: Fibronectin type-III domain-containing protein 3A (Mus musculus)	GO:0005515	GO:0000003,GO:0000139,GO:0001669,GO:0002064,GO:0003006,GO:0005575,GO:0005622,GO:0005623,GO:0005737,GO:0005794,GO:0005829,GO:0007155,GO:0007275,GO:0007276,GO:0007281,GO:0007283,GO:0007286,GO:0007548,GO:0008150,GO:0008406,GO:0008584,GO:0009566,GO:0009888,GO:0009987,GO:0012505,GO:0012506,GO:0016020,GO:0016023,GO:0016337,GO:0019953,GO:0022412,GO:0022414,GO:0022610,GO:0030141,GO:0030154,GO:0030855,GO:…	NA	NA	NA	NA	PF00041
pdam_00001005	0.219444	0.255807	0.156806	0.453333	0.349942	0.464368	NA	NA	NA	NA	SPAC824.03c: Uncharacterized protein C824.03c%2C mitochondrial (Schizosaccharomyces pombe (strain 972 / ATCC 24843))	GO:0003677, GO:0004519, GO:0009307	NA	NA	NA	NA	NA	PF04471
pdam_00001006	-0.126118	-0.169519	-0.114931	0.51051	0.331216	0.397535	NA	NA	NA	RYK	Ryk: Tyrosine-protein kinase RYK (Mus musculus)	GO:0004672, GO:0005524, GO:0006468	GO:0000003,GO:0000902,GO:0000904,GO:0001501,GO:0001558,GO:0001667,GO:0001709,GO:0002009,GO:0003002,GO:0003006,GO:0003008,GO:0003401,GO:0003674,GO:0003824,GO:0004672,GO:0004713,GO:0004714,GO:0004716,GO:0004871,GO:0004872,GO:0004888,GO:0005057,GO:0005488,GO:0005515,GO:0005575,GO:0005622,GO:0005623,GO:0005634,GO:0005737,GO:0005886,GO:0005887,GO:0006464,GO:0006468,GO:0006793,GO:0006796,GO:0006810,GO:…	K05128	K05128,K08252	T	Signal transduction mechanisms	PF02019, PF07714
pdam_00001007	-0.303424	-0.15429	-0.242278	0.401041	0.711003	0.359032	NA	NA	NA	SRCRB4D	lgals3bpb: Galectin-3-binding protein B (Danio rerio)	GO:0005044, GO:0016020	GO:0001817,GO:0005575,GO:0005576,GO:0005622,GO:0005623,GO:0005737,GO:0006950,GO:0006952,GO:0008150,GO:0032677,GO:0032879,GO:0032880,GO:0040008,GO:0040009,GO:0040010,GO:0044424,GO:0044464,GO:0045927,GO:0048518,GO:0050707,GO:0050708,GO:0050789,GO:0050794,GO:0050896,GO:0051046,GO:0051049,GO:0051223,GO:0051239,GO:0060341,GO:0065007,GO:0070201,GO:2000482	NA	K13912	NA	NA	PF00530
pdam_00001008	0.124486	0.230682	0.564752	0.514696	0.149367	2.33287e-06	NA	NA	Upregulated	MFSD1	Mfsd1: Major facilitator superfamily domain-containing protein 1 (Mus musculus)	GO:0016021, GO:0055085	GO:0005575,GO:0016020	NA	NA	G	Carbohydrate transport and metabolism	PF07690
pdam_00001009	0.106599	0.0720746	0.175345	0.606542	0.750208	0.191626	NA	NA	NA	MEGF8	Megf8: Multiple epidermal growth factor-like domains protein 8 (Rattus norvegicus)	GO:0005509, GO:0005515	GO:0001667,GO:0001702,GO:0002009,GO:0002011,GO:0003140,GO:0003674,GO:0005198,GO:0005488,GO:0005509,GO:0005575,GO:0005622,GO:0005623,GO:0005634,GO:0006355,GO:0006357,GO:0006928,GO:0007154,GO:0007165,GO:0007166,GO:0007167,GO:0007178,GO:0007275,GO:0007368,GO:0007369,GO:0007389,GO:0007498,GO:0007507,GO:0008150,GO:0009653,GO:0009790,GO:0009799,GO:0009855,GO:0009888,GO:0009889,GO:0009987,GO:0010468,GO:…	K23664	NA	T	Signal transduction mechanisms	PF00053, PF00431, PF01437, PF07645, PF134181
pdam_00001011	-0.0947359	-0.0965237	-0.135947	0.660916	0.643342	0.331919	NA	NA	NA	EI24	Ei24: Etoposide-induced protein 2.4 homolog (Rattus norvegicus)	NA	GO:0001558,GO:0002119,GO:0002164,GO:0005575,GO:0005622,GO:0005623,GO:0005634,GO:0005635,GO:0005737,GO:0005783,GO:0005789,GO:0006917,GO:0007275,GO:0008150,GO:0009790,GO:0009791,GO:0009792,GO:0010941,GO:0010942,GO:0012502,GO:0012505,GO:0016020,GO:0030308,GO:0031090,GO:0031965,GO:0031967,GO:0031975,GO:0032501,GO:0032502,GO:0040007,GO:0040008,GO:0042175,GO:0042221,GO:0042493,GO:0042981,GO:0043065,GO:…	K10134	K10134	NA	NA	PF07264
pdam_00001012	0.118939	-0.039581	0.124755	0.637531	0.897444	0.459692	NA	NA	NA	CYP46A1	CYP46A1: Cholesterol 24-hydroxylase (Homo sapiens)	GO:0005506, GO:0016705, GO:0020037, GO:0055114	GO:0003674,GO:0003824,GO:0004497,GO:0005575,GO:0005622,GO:0005623,GO:0005737,GO:0005783,GO:0005789,GO:0006066,GO:0006082,GO:0006629,GO:0006694,GO:0006699,GO:0006706,GO:0006707,GO:0006805,GO:0007275,GO:0007399,GO:0008150,GO:0008152,GO:0008202,GO:0008203,GO:0008206,GO:0008395,GO:0008610,GO:0009056,GO:0009058,GO:0009410,GO:0009987,GO:0012505,GO:0016020,GO:0016042,GO:0016053,GO:0016125,GO:0016127,GO:…	NA	K07428,K07440,K12795,K14338	Q	Secondary metabolites biosynthesis, transport and catabolism	PF00067
pdam_00001013	0.0752635	-0.0500515	0.0854888	0.750598	0.847691	0.578573	NA	NA	NA	NA	B4galnt4: N-acetyl-beta-glucosaminyl-glycoprotein 4-beta-N-acetylgalactosaminyltransferase 1 (Mus musculus)	GO:0008376, GO:0032580	NA	NA	NA	G	Carbohydrate transport and metabolism	PF05679, PF07691
pdam_00001014	-0.666796	-0.111556	-1.01496	0.0949986	0.842448	0.00078577	NA	NA	Downregulated	NA	unknown function	NA	NA	NA	NA	NA	NA	NA
pdam_00001015	0.313214	-0.00431954	-0.325327	0.19743	0.993505	0.0697013	NA	NA	NA	POLE	Pole: DNA polymerase epsilon catalytic subunit A (Mus musculus)	GO:0000166, GO:0003676, GO:0003677, GO:0003887, GO:0005634, GO:0006260, GO:0006281, GO:0008270, GO:0008408, GO:0008622	GO:0000003,GO:0000070,GO:0000075,GO:0000076,GO:0000077,GO:0000082,GO:0000084,GO:0000109,GO:0000228,GO:0000278,GO:0000280,GO:0000722,GO:0000723,GO:0000726,GO:0000731,GO:0000819,GO:0001701,GO:0002009,GO:0003006,GO:0003674,GO:0003676,GO:0003677,GO:0003682,GO:0003690,GO:0003697,GO:0003824,GO:0003887,GO:0004518,GO:0004527,GO:0004529,GO:0004536,GO:0005488,GO:0005575,GO:0005622,GO:0005623,GO:0005634,GO:…	K02324	K02148,K02324	L	Replication, recombination and repair	PF00136, PF03104, PF08490
pdam_00001017	0.273076	0.253686	0.282188	0.399681	0.429162	0.219814	NA	NA	NA	NA	Lrrc74a: Leucine-rich repeat-containing protein 74A (Rattus norvegicus)	GO:0005509, GO:0005515	GO:0005575,GO:0005622,GO:0005623,GO:0005737,GO:0005739,GO:0009507,GO:0009526,GO:0009536,GO:0009941,GO:0031967,GO:0031975,GO:0043226,GO:0043227,GO:0043229,GO:0043231,GO:0044422,GO:0044424,GO:0044434,GO:0044435,GO:0044444,GO:0044446,GO:0044464	NA	NA	NA	NA	PF13202, PF13499, PF13516
pdam_00001018	0.331288	-0.244118	-0.639481	0.36921	0.535343	0.0108042	NA	NA	Downregulated	NA	Myosin heavy chain%2C striated muscle (Argopecten irradians)	NA	GO:0000003,GO:0000226,GO:0000922,GO:0003006,GO:0005575,GO:0005622,GO:0005623,GO:0005815,GO:0005816,GO:0005819,GO:0005856,GO:0006996,GO:0007010,GO:0007017,GO:0007049,GO:0008104,GO:0008150,GO:0009653,GO:0009987,GO:0010927,GO:0015630,GO:0016043,GO:0019953,GO:0022402,GO:0022413,GO:0022414,GO:0030154,GO:0030435,GO:0030437,GO:0031023,GO:0031321,GO:0031322,GO:0032502,GO:0032505,GO:0032989,GO:0032991,GO:…	NA	NA	NA	NA	NA
pdam_00001019	0.284558	-0.0514461	-0.432973	0.433599	0.91837	0.0810767	NA	NA	NA	NA	unknown function	NA	GO:0000003,GO:0000226,GO:0000922,GO:0003006,GO:0005575,GO:0005622,GO:0005623,GO:0005815,GO:0005816,GO:0005819,GO:0005856,GO:0006996,GO:0007010,GO:0007017,GO:0007049,GO:0008104,GO:0008150,GO:0009653,GO:0009987,GO:0010927,GO:0015630,GO:0016043,GO:0019953,GO:0022402,GO:0022413,GO:0022414,GO:0030154,GO:0030435,GO:0030437,GO:0031023,GO:0031321,GO:0031322,GO:0032502,GO:0032505,GO:0032989,GO:0032991,GO:…	NA	NA	NA	NA	NA
pdam_00001020	0.298753	-0.671316	-1.1888	0.601329	0.144606	0.000645799	NA	NA	Downregulated	NA	unknown function	NA	GO:0000003,GO:0000226,GO:0000922,GO:0003006,GO:0005575,GO:0005622,GO:0005623,GO:0005815,GO:0005816,GO:0005819,GO:0005856,GO:0006996,GO:0007010,GO:0007017,GO:0007049,GO:0008104,GO:0008150,GO:0009653,GO:0009987,GO:0010927,GO:0015630,GO:0016043,GO:0019953,GO:0022402,GO:0022413,GO:0022414,GO:0030154,GO:0030435,GO:0030437,GO:0031023,GO:0031321,GO:0031322,GO:0032502,GO:0032505,GO:0032989,GO:0032991,GO:…	NA	NA	NA	NA	NA
pdam_00001022	-0.22428	-0.065923	-1.10018	0.647596	0.913662	0.000149776	NA	NA	Downregulated	NA	unknown function	NA	GO:0000003,GO:0000226,GO:0000922,GO:0003006,GO:0005575,GO:0005622,GO:0005623,GO:0005815,GO:0005816,GO:0005819,GO:0005856,GO:0006996,GO:0007010,GO:0007017,GO:0007049,GO:0008104,GO:0008150,GO:0009653,GO:0009987,GO:0010927,GO:0015630,GO:0016043,GO:0019953,GO:0022402,GO:0022413,GO:0022414,GO:0030154,GO:0030435,GO:0030437,GO:0031023,GO:0031321,GO:0031322,GO:0032502,GO:0032505,GO:0032989,GO:0032991,GO:…	NA	NA	NA	NA	NA
pdam_00001025	0.00362048	-0.110466	-0.160924	0.985463	0.4423	0.107764	NA	NA	NA	IP6K1	Ip6k1: Inositol hexakisphosphate kinase 1 (Rattus norvegicus)	GO:0008440	GO:0001558,GO:0002376,GO:0005575,GO:0005622,GO:0005623,GO:0005634,GO:0005654,GO:0005730,GO:0005737,GO:0005856,GO:0005975,GO:0006020,GO:0006066,GO:0006629,GO:0006644,GO:0006650,GO:0006793,GO:0006796,GO:0006810,GO:0006811,GO:0006817,GO:0006820,GO:0006950,GO:0006952,GO:0006955,GO:0007154,GO:0007165,GO:0007166,GO:0007224,GO:0007227,GO:0008150,GO:0008152,GO:0008589,GO:0009058,GO:0009966,GO:0009967,GO:…	K07756	K07756	T	Signal transduction mechanisms	PF03770
pdam_00001026	0.151382	0.167126	0.0166229	0.372485	0.30115	0.905774	NA	NA	NA	NUDT4	NUDT3: Diphosphoinositol polyphosphate phosphohydrolase 1 (Homo sapiens)	GO:0016787	GO:0000287,GO:0003674,GO:0003676,GO:0003723,GO:0003824,GO:0005488,GO:0005575,GO:0005622,GO:0005623,GO:0005634,GO:0005737,GO:0006066,GO:0006139,GO:0006725,GO:0006753,GO:0006793,GO:0006796,GO:0006807,GO:0006810,GO:0007154,GO:0007165,GO:0007267,GO:0008150,GO:0008152,GO:0008486,GO:0009056,GO:0009117,GO:0009166,GO:0009187,GO:0009507,GO:0009536,GO:0009987,GO:0015959,GO:0015961,GO:0016462,GO:0016787,GO:…	K07766	K07766	L	Replication, recombination and repair	PF00293
pdam_00001027	0.322252	0.239273	0.545602	0.113854	0.240935	0.000235025	NA	NA	Upregulated	TMEM164	Tmem164: Transmembrane protein 164 (Mus musculus)	NA	GO:0005575,GO:0016020	NA	NA	NA	NA	PF14808
pdam_00001028	0.196518	-0.0903223	-0.263198	0.327414	0.702168	0.063806	NA	NA	NA	NA	ZNF727: Putative zinc finger protein 727 (Homo sapiens)	GO:0003676	NA	NA	K09228	K	Transcription	PF00096
pdam_00001030	-0.395453	-0.731635	-1.71354	0.381364	0.0514173	9.06961e-09	NA	NA	Downregulated	WNT11	WNT5A: Protein Wnt-5a (Homo sapiens)	GO:0005102, GO:0005576, GO:0007275, GO:0016055	GO:0000122,GO:0000132,GO:0000226,GO:0000278,GO:0000975,GO:0001067,GO:0001501,GO:0001503,GO:0001558,GO:0001568,GO:0001649,GO:0001654,GO:0001655,GO:0001657,GO:0001664,GO:0001667,GO:0001702,GO:0001704,GO:0001707,GO:0001743,GO:0001755,GO:0001816,GO:0001817,GO:0001818,GO:0001819,GO:0001822,GO:0001823,GO:0001839,GO:0001840,GO:0001932,GO:0001934,GO:0001944,GO:0001947,GO:0002009,GO:0002065,GO:0003002,GO:…	NA	K01384	O	Posttranslational modification, protein turnover, chaperones	PF00110
pdam_00001031	-0.369863	-0.189589	-0.673708	0.062678	0.384051	8.96885e-06	NA	NA	Downregulated	NA	Nca: Neurocalcin homolog (Drosophila melanogaster)	GO:0005509	NA	NA	NA	T	Signal transduction mechanisms	PF13202, PF13499
pdam_00001032	0.0177747	-0.417948	-0.680128	0.940072	0.000834981	1.30147e-09	NA	Downregulated	Downregulated	NA	arglu1a: Arginine and glutamate-rich protein 1-A (Danio rerio)	NA	NA	K13173	K13173	NA	NA	PF15346
pdam_00001033	0.100558	-0.170876	-0.133487	0.725846	0.505764	0.467975	NA	NA	NA	DNAH2	Dnah2: Dynein heavy chain 2%2C axonemal (Mus musculus)	GO:0003777, GO:0005524, GO:0007018, GO:0016887, GO:0030286	GO:0001539,GO:0003674,GO:0003774,GO:0003777,GO:0003824,GO:0005575,GO:0005622,GO:0005623,GO:0005737,GO:0005856,GO:0005858,GO:0005875,GO:0005929,GO:0005930,GO:0006139,GO:0006152,GO:0006163,GO:0006195,GO:0006200,GO:0006725,GO:0006753,GO:0006793,GO:0006796,GO:0006807,GO:0006928,GO:0008150,GO:0008152,GO:0009056,GO:0009116,GO:0009117,GO:0009119,GO:0009123,GO:0009125,GO:0009126,GO:0009128,GO:0009141,GO:…	K10408	K10408	Z	Cytoskeleton	PF03028, PF07728, PF08385, PF08393, PF12774, PF12775, PF12777, PF12780, PF12781
pdam_00001035	-0.0774431	0.0916714	0.4026	0.782065	0.741666	0.0112542	NA	NA	Upregulated	NA	unknown function	NA	NA	NA	NA	NA	NA	PF15879
pdam_00001036	0.0796212	0.0521496	1.6798	0.912848	0.950228	4.64524e-06	NA	NA	Upregulated	TSTD1	Tstd3: Thiosulfate sulfurtransferase/rhodanese-like domain-containing protein 3 (Mus musculus)	NA	GO:0003674,GO:0003824,GO:0004792,GO:0005488,GO:0005515,GO:0005575,GO:0005622,GO:0005623,GO:0005737,GO:0005739,GO:0005740,GO:0005741,GO:0005783,GO:0006457,GO:0006950,GO:0006979,GO:0007568,GO:0008150,GO:0008152,GO:0009266,GO:0009408,GO:0009507,GO:0009536,GO:0009579,GO:0009611,GO:0009628,GO:0009719,GO:0009725,GO:0009753,GO:0009987,GO:0010033,GO:0016020,GO:0016740,GO:0016782,GO:0016783,GO:0019538,GO:…	K01013	K01011	P	Inorganic ion transport and metabolism	PF00581
pdam_00001037	-0.00884779	-0.0845207	-0.222589	0.96338	0.581736	0.0218867	NA	NA	Downregulated	INTS6	ints6-b: Integrator complex subunit 6-B (Xenopus laevis)	NA	GO:0000003,GO:0000428,GO:0002119,GO:0002164,GO:0003006,GO:0003674,GO:0004871,GO:0004872,GO:0004888,GO:0005575,GO:0005622,GO:0005623,GO:0005634,GO:0005654,GO:0005856,GO:0006139,GO:0006396,GO:0006725,GO:0006807,GO:0006810,GO:0006897,GO:0006898,GO:0006915,GO:0007154,GO:0007165,GO:0007275,GO:0007276,GO:0007281,GO:0007292,GO:0007568,GO:0008150,GO:0008152,GO:0008219,GO:0008340,GO:0009790,GO:0009791,GO:…	K13143	K13143,K13180	NA	NA	PF13519, PF15300
pdam_00001038	0.398645	0.188722	0.0211813	0.294904	NA	0.949663	NA	NA	NA	PPP1R35	Ppp1r35: Protein phosphatase 1 regulatory subunit 35 (Mus musculus)	NA	GO:0003674,GO:0005488,GO:0005515,GO:0008150,GO:0010921,GO:0010923,GO:0019220,GO:0019222,GO:0019899,GO:0019902,GO:0031323,GO:0035303,GO:0043086,GO:0044092,GO:0050789,GO:0050790,GO:0050794,GO:0051174,GO:0051336,GO:0051346,GO:0065007,GO:0065009	NA	K17574	T	Signal transduction mechanisms	PF15503
pdam_00001040	-0.0465093	-0.35643	-0.681728	0.868293	0.0494261	4.22015e-06	NA	Downregulated	Downregulated	TMPRSS9	TMPRSS9: Transmembrane protease serine 9 (Homo sapiens)	GO:0004252, GO:0006508	GO:0000902,GO:0003008,GO:0003674,GO:0003824,GO:0004175,GO:0004252,GO:0005575,GO:0005576,GO:0005578,GO:0005615,GO:0005622,GO:0005623,GO:0005737,GO:0005886,GO:0006508,GO:0006950,GO:0007154,GO:0007267,GO:0007268,GO:0007275,GO:0007399,GO:0007610,GO:0007611,GO:0007613,GO:0008150,GO:0008152,GO:0008219,GO:0008233,GO:0008236,GO:0008283,GO:0008544,GO:0009611,GO:0009653,GO:0009888,GO:0009987,GO:0010646,GO:…	K09640	K01312,K08664,K08668,K09626,K09628,K09629,K09630,K09640	O	Posttranslational modification, protein turnover, chaperones	PF00089, PF00754
pdam_00001041	0.285936	-0.219055	-0.124202	0.259731	0.410445	0.539109	NA	NA	NA	KLK8	Tmprss9: Transmembrane protease serine 9 (Mus musculus)	GO:0004252, GO:0006508	GO:0000902,GO:0003008,GO:0003674,GO:0003824,GO:0004175,GO:0004252,GO:0005575,GO:0005576,GO:0005615,GO:0005622,GO:0005623,GO:0005737,GO:0006508,GO:0006950,GO:0007154,GO:0007267,GO:0007268,GO:0007275,GO:0007399,GO:0007610,GO:0007611,GO:0007613,GO:0008150,GO:0008152,GO:0008219,GO:0008233,GO:0008236,GO:0008283,GO:0008544,GO:0009611,GO:0009653,GO:0009790,GO:0009792,GO:0009888,GO:0009987,GO:0010646,GO:…	NA	K08650,K08668,K09618	O	Posttranslational modification, protein turnover, chaperones	PF00089
pdam_00001045	-0.0538562	0.0292605	0.194387	0.938249	0.972043	0.612095	NA	NA	NA	NA	loxl3b: Lysyl oxidase homolog 3B (Danio rerio)	GO:0005044, GO:0016020	NA	NA	NA	NA	NA	PF00530
pdam_00001047	-0.117531	0.0742533	0.0562941	0.823993	0.900325	0.869733	NA	NA	NA	CD163	SSC5D: Soluble scavenger receptor cysteine-rich domain-containing protein SSC5D (Homo sapiens)	GO:0005044, GO:0016020	GO:0003674,GO:0004872,GO:0005044,GO:0005575,GO:0005576,GO:0005623,GO:0005886,GO:0005887,GO:0006810,GO:0006897,GO:0006898,GO:0008150,GO:0016020,GO:0016021,GO:0016192,GO:0031224,GO:0031226,GO:0038024,GO:0040008,GO:0040009,GO:0040010,GO:0044425,GO:0044459,GO:0044464,GO:0045927,GO:0048518,GO:0050789,GO:0051179,GO:0051234,GO:0065007,GO:0071944	NA	K06545	NA	NA	PF00530
pdam_00001052	-0.130694	-0.283845	-0.430016	0.605011	0.163604	0.00589982	NA	NA	Downregulated	NA	unknown function	NA	NA	NA	NA	U	Intracellular trafficking, secretion, and vesicular transport	NA
pdam_00001053	0.115534	-0.341793	-0.582066	0.537669	0.014769	9.48857e-07	NA	Downregulated	Downregulated	ANO3	ANO5: Anoctamin-5 (Homo sapiens)	NA	GO:0002526,GO:0002543,GO:0003674,GO:0005215,GO:0005216,GO:0005227,GO:0005244,GO:0005253,GO:0005254,GO:0005261,GO:0005575,GO:0005622,GO:0005623,GO:0005737,GO:0005783,GO:0005789,GO:0005886,GO:0006810,GO:0006811,GO:0006812,GO:0006820,GO:0006821,GO:0006950,GO:0006952,GO:0006954,GO:0007009,GO:0007596,GO:0007599,GO:0008150,GO:0008324,GO:0008509,GO:0009611,GO:0009987,GO:0012505,GO:0015075,GO:0015103,GO:…	NA	K19480,K19496,K19498,K19499,K19500,K19501	U	Intracellular trafficking, secretion, and vesicular transport	PF04547
pdam_00001055	0.287019	-0.202218	-0.34724	0.303334	0.500304	0.0853755	NA	NA	NA	ANO3	ANO5: Anoctamin-5 (Homo sapiens)	GO:0046983	GO:0002526,GO:0002543,GO:0003674,GO:0005215,GO:0005216,GO:0005227,GO:0005244,GO:0005253,GO:0005254,GO:0005261,GO:0005575,GO:0005622,GO:0005623,GO:0005737,GO:0005783,GO:0005789,GO:0005886,GO:0006810,GO:0006811,GO:0006812,GO:0006820,GO:0006821,GO:0006950,GO:0006952,GO:0006954,GO:0007009,GO:0007596,GO:0007599,GO:0008150,GO:0008324,GO:0008509,GO:0009611,GO:0009987,GO:0012505,GO:0015075,GO:0015103,GO:…	NA	K19480,K19496,K19498,K19499,K19500,K19501	U	Intracellular trafficking, secretion, and vesicular transport	PF16178
pdam_00001056	-0.276704	-0.170669	-0.602642	0.46757	0.6827	0.0165582	NA	NA	Downregulated	CNP	Cnp: 2'%2C3'-cyclic-nucleotide 3'-phosphodiesterase (Rattus norvegicus)	GO:0004113, GO:0009214, GO:0016020	GO:0000166,GO:0000226,GO:0000902,GO:0000904,GO:0002237,GO:0003008,GO:0003674,GO:0003824,GO:0004112,GO:0004113,GO:0005488,GO:0005575,GO:0005576,GO:0005615,GO:0005622,GO:0005623,GO:0005737,GO:0005739,GO:0005740,GO:0005741,GO:0005743,GO:0005829,GO:0005856,GO:0005874,GO:0005886,GO:0005902,GO:0006810,GO:0006839,GO:0006950,GO:0006996,GO:0007005,GO:0007006,GO:0007010,GO:0007017,GO:0007154,GO:0007267,GO:…	K01121	K01121	L	Replication, recombination and repair	PF05881, PF13671
pdam_00001058	-0.0570193	-0.0501824	-0.0196953	0.674921	0.715514	0.837111	NA	NA	NA	NA	Ggt1: Gamma-glutamyltranspeptidase 1 (Rattus norvegicus)	GO:0006751, GO:0036374	NA	K00681	K00681,K18592	E	Amino acid transport and metabolism	PF01019
pdam_00001059	0.0493722	-0.0437008	-0.0384952	0.758137	0.795741	0.71825	NA	NA	NA	CAMK2D	CAMK2D: Calcium/calmodulin-dependent protein kinase type II subunit delta (Bos taurus)	GO:0004672, GO:0004683, GO:0005516, GO:0005524, GO:0006468	GO:0000003,GO:0000082,GO:0000166,GO:0000278,GO:0000280,GO:0001558,GO:0001655,GO:0001666,GO:0001775,GO:0001822,GO:0001882,GO:0001883,GO:0002009,GO:0002028,GO:0002029,GO:0002030,GO:0002376,GO:0002790,GO:0003001,GO:0003007,GO:0003008,GO:0003012,GO:0003013,GO:0003015,GO:0003143,GO:0003146,GO:0003674,GO:0003824,GO:0004672,GO:0004674,GO:0004683,GO:0004721,GO:0004722,GO:0004723,GO:0005488,GO:0005515,GO:…	K04515	K04515,K06103,K06641	T	Signal transduction mechanisms	PF00069, PF08332
pdam_00001060	0.0965184	-0.0509769	0.110038	0.264688	0.603792	0.0783445	NA	NA	NA	ERLIN2	Erlin1: Erlin-1 (Mus musculus)	GO:0005783, GO:0030433, GO:0031625	GO:0005575,GO:0005622,GO:0005623,GO:0005634,GO:0005730,GO:0005737,GO:0005773,GO:0005774,GO:0005783,GO:0005789,GO:0005794,GO:0005886,GO:0005911,GO:0006508,GO:0006511,GO:0008150,GO:0008152,GO:0009056,GO:0009057,GO:0009506,GO:0009987,GO:0010498,GO:0012505,GO:0016020,GO:0019538,GO:0019941,GO:0030054,GO:0030163,GO:0030433,GO:0031090,GO:0031974,GO:0031981,GO:0032991,GO:0040011,GO:0042175,GO:0043161,GO:…	K23341	NA	B	Chromatin structure and dynamics	PF01145
pdam_00001063	-0.170387	0.0326715	0.17317	0.602099	0.93854	0.426423	NA	NA	NA	NA	TACR2: Substance-K receptor (Homo sapiens)	GO:0004930, GO:0007186, GO:0016021	GO:0005575,GO:0005623,GO:0005886,GO:0016020,GO:0044464,GO:0071944	NA	K04223,K04225	T	Signal transduction mechanisms	PF00001
pdam_00001071	-0.474395	-0.15164	-1.32667	0.255066	0.774195	4.14898e-06	NA	NA	Downregulated	CHRNA3	CHRNA3: Neuronal acetylcholine receptor subunit alpha-3 (Homo sapiens)	GO:0005216, GO:0005230, GO:0006811, GO:0016021	GO:0000003,GO:0000187,GO:0000902,GO:0000904,GO:0001501,GO:0001505,GO:0001508,GO:0001540,GO:0001558,GO:0001661,GO:0001666,GO:0001775,GO:0001817,GO:0001818,GO:0001932,GO:0001934,GO:0001941,GO:0001976,GO:0001978,GO:0001982,GO:0001988,GO:0002009,GO:0002027,GO:0002119,GO:0002164,GO:0002376,GO:0002682,GO:0002684,GO:0002694,GO:0002696,GO:0003008,GO:0003009,GO:0003012,GO:0003013,GO:0003014,GO:0003025,GO:…	NA	K04803,K04804,K04805,K04806,K04807,K04808,K04809,K04812,K04813,K04814,K04815,K04816,K04817,K04818,K05312	T	Signal transduction mechanisms	PF02931, PF02932
pdam_00001073	-0.293829	-0.162062	-0.364371	0.22948	0.548532	0.0387531	NA	NA	Downregulated	NA	unknown function	GO:0003676, GO:0008270	NA	NA	NA	NA	NA	NA
pdam_00001074	0.181809	0.183206	0.29061	0.424792	0.408436	0.0597517	NA	NA	NA	GSKIP	gskip: GSK3-beta interaction protein (Danio rerio)	NA	GO:0003674,GO:0005488,GO:0005515,GO:0005575,GO:0005622,GO:0005623,GO:0005737,GO:0007275,GO:0008150,GO:0009790,GO:0009792,GO:0032501,GO:0032502,GO:0043226,GO:0043228,GO:0043229,GO:0043232,GO:0043292,GO:0044422,GO:0044424,GO:0044444,GO:0044449,GO:0044464,GO:0044699,GO:0044707,GO:0044767,GO:0048471,GO:0048856,GO:0055120	NA	NA	NA	NA	PF053037
pdam_00001076	-0.132313	0.144427	0.32079	0.690104	0.652722	0.111724	NA	NA	NA	NA	unknown function	NA	NA	NA	NA	NA	NA	NA
pdam_00001077	-0.276388	0.34343	2.31735	0.736265	0.661951	4.22086e-07	NA	NA	Upregulated	SQRDL	SQRDL: Sulfide:quinone oxidoreductase%2C mitochondrial (Homo sapiens)	GO:0016491, GO:0055114	GO:0000096,GO:0000098,GO:0000166,GO:0003674,GO:0003824,GO:0005488,GO:0005575,GO:0005622,GO:0005623,GO:0005737,GO:0005739,GO:0005740,GO:0005743,GO:0006082,GO:0006518,GO:0006520,GO:0006575,GO:0006749,GO:0006750,GO:0006790,GO:0006807,GO:0006873,GO:0006950,GO:0008150,GO:0008152,GO:0008652,GO:0009056,GO:0009058,GO:0009063,GO:0009636,GO:0009987,GO:0010035,GO:0010038,GO:0016020,GO:0016053,GO:0016054,GO:…	K22470	K17218	C	Energy production and conversion	PF07992
pdam_00001078	-0.163709	-0.34846	-0.625374	0.559714	0.124642	0.000491231	NA	NA	Downregulated	CERS1	Cers1: Ceramide synthase 1 (Mus musculus)	GO:0005783, GO:0016021	GO:0000038,GO:0000139,GO:0001676,GO:0002238,GO:0003674,GO:0003824,GO:0005575,GO:0005622,GO:0005623,GO:0005634,GO:0005737,GO:0005783,GO:0005789,GO:0005794,GO:0005886,GO:0006082,GO:0006629,GO:0006631,GO:0006633,GO:0006643,GO:0006644,GO:0006665,GO:0006672,GO:0006793,GO:0006796,GO:0006807,GO:0008150,GO:0008152,GO:0008610,GO:0009058,GO:0009607,GO:0009620,GO:0009987,GO:0010033,GO:0010876,GO:0012505,GO:…	NA	K04710,K17087	I	Lipid transport and metabolism	PF03798
pdam_00001079	-0.121593	-0.137885	-0.014169	0.395811	0.303634	0.903547	NA	NA	NA	BLOC1S6	BLOC1S6: Biogenesis of lysosome-related organelles complex 1 subunit 6 (Bos taurus)	NA	GO:0000149,GO:0001505,GO:0002065,GO:0002682,GO:0002684,GO:0002694,GO:0002696,GO:0003001,GO:0003008,GO:0003674,GO:0003779,GO:0005488,GO:0005515,GO:0005575,GO:0005622,GO:0005623,GO:0005737,GO:0005768,GO:0005829,GO:0006810,GO:0006836,GO:0006887,GO:0006892,GO:0006904,GO:0006906,GO:0006928,GO:0006944,GO:0006950,GO:0006996,GO:0007017,GO:0007018,GO:0007154,GO:0007267,GO:0007268,GO:0007269,GO:0007275,GO:…	K20188	NA	U	Intracellular trafficking, secretion, and vesicular transport	PF14712
pdam_00001080	0.12856	-0.0098081	-0.109224	0.732306	0.985953	0.661799	NA	NA	NA	DPP8	Dpp8: Dipeptidyl peptidase 8 (Mus musculus)	GO:0006508, GO:0008236	GO:0002376,GO:0003674,GO:0003824,GO:0005575,GO:0005622,GO:0005623,GO:0005634,GO:0005737,GO:0005829,GO:0006508,GO:0006955,GO:0008150,GO:0008152,GO:0008233,GO:0008238,GO:0008239,GO:0016787,GO:0019538,GO:0043170,GO:0043226,GO:0043227,GO:0043229,GO:0043231,GO:0044238,GO:0044424,GO:0044444,GO:0044464,GO:0050896,GO:0070011,GO:0071704	K08656	K01278,K08655,K08656	O	Posttranslational modification, protein turnover, chaperones	PF00326, PF00930
pdam_00001081	0.00695754	-0.0374457	0.221524	0.978839	0.882855	0.0874667	NA	NA	NA	ISOC1	isoc1: Isochorismatase domain-containing protein 1 (Salmo salar)	GO:0003824, GO:0008152	GO:0005575,GO:0005622,GO:0005623,GO:0005737,GO:0005777,GO:0042579,GO:0043226,GO:0043227,GO:0043229,GO:0043231,GO:0044424,GO:0044444,GO:0044464	NA	NA	Q	Secondary metabolites biosynthesis, transport and catabolism	PF00857
pdam_00001082	-0.702564	-0.491094	-0.21562	0.0241424	0.127854	0.4323	Downregulated	NA	NA	NA	unknown function	NA	NA	NA	NA	NA	NA	NA
pdam_00001083	-0.11571	-0.0684761	0.662473	0.732306	0.856341	0.00051755	NA	NA	Upregulated	NA	unknown function	NA	NA	NA	NA	NA	NA	NA
pdam_00001087	-0.026672	0.0737347	0.23401	0.874801	0.603572	0.00774872	NA	NA	Upregulated	TDRKH	Tdrkh: Tudor and KH domain-containing protein (Mus musculus)	GO:0003676, GO:0003723	GO:0003674,GO:0005488,GO:0005515,GO:0005575,GO:0005622,GO:0005623,GO:0005634,GO:0005635,GO:0005694,GO:0005737,GO:0005739,GO:0005829,GO:0012505,GO:0016020,GO:0030529,GO:0031090,GO:0031965,GO:0031967,GO:0031975,GO:0032991,GO:0035770,GO:0043186,GO:0043226,GO:0043227,GO:0043228,GO:0043229,GO:0043231,GO:0043232,GO:0044422,GO:0044424,GO:0044428,GO:0044444,GO:0044446,GO:0044464,GO:0045495,GO:0060293	K18406	K18406,K18409	T	Signal transduction mechanisms	PF00013, PF00567
pdam_00001088	-0.0240399	0.258753	0.671673	0.954402	0.37171	0.00067003	NA	NA	Upregulated	RFK	RFK: Riboflavin kinase (Homo sapiens)	GO:0008531, GO:0009231	GO:0003674,GO:0003824,GO:0003919,GO:0005575,GO:0005622,GO:0005623,GO:0005634,GO:0005737,GO:0005739,GO:0005740,GO:0005741,GO:0005743,GO:0005829,GO:0006139,GO:0006725,GO:0006732,GO:0006753,GO:0006766,GO:0006767,GO:0006771,GO:0006793,GO:0006796,GO:0006807,GO:0008150,GO:0008152,GO:0008531,GO:0009058,GO:0009108,GO:0009110,GO:0009117,GO:0009123,GO:0009124,GO:0009156,GO:0009161,GO:0009165,GO:0009231,GO:…	K00861	K00861,K00953,K01376	H	Coenzyme transport and metabolism	PF01687
pdam_00001089	-0.326697	-0.0656052	0.382618	0.258435	0.868872	0.063882	NA	NA	NA	NA	unknown function	NA	NA	NA	NA	NA	NA	NA
pdam_00001090	0.110867	0.0347121	0.390276	0.722075	0.926771	0.0318841	NA	NA	Upregulated	CTIF	CTIF: CBP80/20-dependent translation initiation factor (Homo sapiens)	GO:0003723, GO:0005488, GO:0005515	GO:0000184,GO:0000956,GO:0003674,GO:0005488,GO:0005515,GO:0005575,GO:0005622,GO:0005623,GO:0005634,GO:0005737,GO:0005783,GO:0006139,GO:0006401,GO:0006402,GO:0006417,GO:0006446,GO:0006725,GO:0006807,GO:0008150,GO:0008152,GO:0009056,GO:0009057,GO:0009889,GO:0009987,GO:0010468,GO:0010556,GO:0010608,GO:0016070,GO:0016071,GO:0016528,GO:0016529,GO:0019222,GO:0019439,GO:0031323,GO:0031326,GO:0032268,GO:…	NA	NA	J	Translation, ribosomal structure and biogenesis	PF02854
pdam_00001091	0.114788	0.162897	0.187034	0.503948	0.295406	0.103913	NA	NA	NA	SMU1	SMU1: WD40 repeat-containing protein SMU1 (Gallus gallus)	GO:0005515	GO:0000151,GO:0000375,GO:0000377,GO:0000398,GO:0002119,GO:0002164,GO:0003008,GO:0005575,GO:0005622,GO:0005623,GO:0005634,GO:0005681,GO:0005737,GO:0006139,GO:0006396,GO:0006397,GO:0006725,GO:0006807,GO:0007154,GO:0007267,GO:0007268,GO:0007274,GO:0007275,GO:0007399,GO:0007517,GO:0007519,GO:0007528,GO:0007610,GO:0007638,GO:0008150,GO:0008152,GO:0008380,GO:0009605,GO:0009612,GO:0009628,GO:0009653,GO:…	K13111	K13111	U	Intracellular trafficking, secretion, and vesicular transport	PF00400
pdam_00001092	0.102122	0.183707	0.473706	0.690104	0.408273	0.00145737	NA	NA	Upregulated	NA	Prrt1: Proline-rich transmembrane protein 1 (Rattus norvegicus)	GO:0009607, GO:0016021	NA	K23896	NA	NA	NA	PF04505
pdam_00001093	-0.471101	-0.282677	-0.0987368	0.29016	0.563149	0.785586	NA	NA	NA	NA	unknown function	GO:0009607, GO:0016021	NA	NA	NA	NA	NA	PF04505
pdam_00001094	-0.557131	-0.732148	-0.808176	0.283855	0.117893	0.0270634	NA	NA	Downregulated	NA	unknown function	NA	NA	NA	NA	NA	NA	PF08560
pdam_00001095	-0.505368	-0.147312	-0.460034	0.0919358	0.70309	0.0452612	NA	NA	Downregulated	NA	SE_0175: Accumulation-associated protein (Staphylococcus epidermidis (strain ATCC 12228))	GO:0009607, GO:0016021	NA	NA	NA	NA	NA	PF04505
pdam_00001096	0.15214	0.374541	0.677252	0.647132	0.148196	0.000544081	NA	NA	Upregulated	NA	SE_0175: Accumulation-associated protein (Staphylococcus epidermidis (strain ATCC 12228))	GO:0009607, GO:0016021	NA	NA	NA	NA	NA	PF04505
pdam_00001099	-0.316118	-0.240482	-0.500337	0.213819	0.354407	0.00541811	NA	NA	Downregulated	NA	unknown function	NA	NA	NA	NA	NA	NA	NA
pdam_00001100	-0.0139498	-0.200316	-0.904444	0.969466	0.446511	1.22489e-07	NA	NA	Downregulated	NA	SYNDIG1: Synapse differentiation-inducing gene protein 1 (Homo sapiens)	GO:0009607, GO:0016021	NA	NA	NA	NA	NA	PF04505
pdam_00001102	-1.15072	-0.695637	-1.69656	0.00491785	0.111866	4.60118e-07	Downregulated	NA	Downregulated	NA	unknown function	GO:0004553, GO:0005975	NA	NA	NA	G	Carbohydrate transport and metabolism	PF00150
pdam_00001104	-0.149192	0.271118	0.164543	0.647596	0.324558	0.444805	NA	NA	NA	NA	unknown function	NA	NA	NA	NA	NA	NA	NA
pdam_00001105	0.0515748	0.134305	0.545872	0.862378	0.596518	0.000408875	NA	NA	Upregulated	NA	GRINA: Protein lifeguard 1 (Homo sapiens)	NA	NA	NA	NA	NA	NA	NA
pdam_00001106	-0.177076	-0.0261003	-0.0776678	0.0542331	0.849379	0.31045	NA	NA	NA	NA	ERG26: Sterol-4-alpha-carboxylate 3-dehydrogenase%2C decarboxylating (Saccharomyces cerevisiae (strain ATCC 204508 / S288c))	GO:0003824, GO:0050662	GO:0005575,GO:0005622,GO:0005623,GO:0005737,GO:0016023,GO:0030139,GO:0031410,GO:0031982,GO:0031988,GO:0043226,GO:0043227,GO:0043229,GO:0043231,GO:0044424,GO:0044444,GO:0044464,GO:0045335	NA	NA	NA	NA	PF01370
pdam_00001107	-0.0110664	0.17279	0.0599375	0.965254	0.327325	0.676315	NA	NA	NA	GABPB2	Gabpb2: GA-binding protein subunit beta-2 (Mus musculus)	GO:0005515	GO:0000123,GO:0000975,GO:0001067,GO:0001071,GO:0003674,GO:0003676,GO:0003677,GO:0003700,GO:0005488,GO:0005515,GO:0005575,GO:0005622,GO:0005623,GO:0005634,GO:0005654,GO:0005671,GO:0006325,GO:0006338,GO:0006355,GO:0006357,GO:0006464,GO:0006473,GO:0006475,GO:0006996,GO:0008150,GO:0008152,GO:0009889,GO:0009891,GO:0009893,GO:0009987,GO:0010468,GO:0010556,GO:0010557,GO:0010604,GO:0010628,GO:0016043,GO:…	K09454	K09454,K19044	K	Transcription	PF12796, PF13637
pdam_00001111	0.24703	-0.304099	-0.728748	0.424367	0.29039	0.000316554	NA	NA	Downregulated	NA	unknown function	NA	NA	NA	NA	NA	NA	NA
pdam_00001112	0.0998705	0.134656	0.531285	0.758137	0.661572	0.00387473	NA	NA	Upregulated	NA	Prrt1: Proline-rich transmembrane protein 1 (Rattus norvegicus)	GO:0009607, GO:0016021	NA	K23896	NA	NA	NA	PF04505
pdam_00001113	-0.359428	-0.35143	-0.672467	0.0995521	0.0838303	3.65826e-05	NA	NA	Downregulated	NA	unknown function	NA	NA	NA	NA	NA	NA	NA
pdam_00001115	-0.0981847	0.101753	-0.0187244	0.673533	0.652748	0.91174	NA	NA	NA	LSM6	Lsm6: U6 snRNA-associated Sm-like protein LSm6 (Mus musculus)	GO:0000398, GO:0005732	GO:0000288,GO:0000291,GO:0000375,GO:0000377,GO:0000398,GO:0000932,GO:0000956,GO:0002119,GO:0002164,GO:0005575,GO:0005622,GO:0005623,GO:0005634,GO:0005681,GO:0005688,GO:0005730,GO:0005732,GO:0005737,GO:0005829,GO:0006139,GO:0006364,GO:0006396,GO:0006397,GO:0006401,GO:0006402,GO:0006725,GO:0006807,GO:0007275,GO:0008150,GO:0008152,GO:0008380,GO:0009056,GO:0009057,GO:0009653,GO:0009790,GO:0009791,GO:…	K12625	K12625	A	RNA processing and modification	PF01423
pdam_00001116	-0.377486	-0.308805	0.0408663	0.31352	0.416429	0.89515	NA	NA	NA	NA	unknown function	NA	NA	NA	NA	NA	NA	PF00024
pdam_00001118	-0.0401171	-0.163887	-0.0629273	0.885571	0.440713	0.703413	NA	NA	NA	NA	cam: Calmodulin (Saccharina japonica)	GO:0005509	NA	NA	K02183	T	Signal transduction mechanisms	PF13499
pdam_00001119	-0.250812	-0.212697	-0.588997	0.312382	0.398216	0.000511884	NA	NA	Downregulated	FOLR4	Riboflavin-binding protein (Gallus gallus)	NA	GO:0003674,GO:0004872,GO:0005215,GO:0005488,GO:0005542,GO:0005575,GO:0005576,GO:0005623,GO:0005886,GO:0005887,GO:0005903,GO:0006082,GO:0006520,GO:0006575,GO:0006605,GO:0006612,GO:0006620,GO:0006725,GO:0006732,GO:0006760,GO:0006766,GO:0006767,GO:0006807,GO:0006810,GO:0006811,GO:0006820,GO:0006835,GO:0006865,GO:0006886,GO:0006897,GO:0006898,GO:0008104,GO:0008150,GO:0008152,GO:0008517,GO:0009987,GO:…	NA	K13649	T	Signal transduction mechanisms	PF03024
pdam_00001120	0.457582	0.0222128	-0.146999	0.042386	0.956535	0.454867	Upregulated	NA	NA	CERS1	Cers1: Ceramide synthase 1 (Mus musculus)	GO:0005783, GO:0016021	GO:0000038,GO:0000139,GO:0001676,GO:0002238,GO:0003674,GO:0003824,GO:0005575,GO:0005622,GO:0005623,GO:0005634,GO:0005737,GO:0005783,GO:0005789,GO:0005794,GO:0005886,GO:0006082,GO:0006629,GO:0006631,GO:0006633,GO:0006643,GO:0006644,GO:0006665,GO:0006672,GO:0006793,GO:0006796,GO:0006807,GO:0008150,GO:0008152,GO:0008610,GO:0009058,GO:0009607,GO:0009620,GO:0009987,GO:0010033,GO:0010876,GO:0012505,GO:…	K04710	K04710,K17087	I	Lipid transport and metabolism	PF03798
pdam_00001121	-0.0348658	-0.138283	-0.270585	0.894984	0.50172	0.0525495	NA	NA	NA	NA	Cubn: Cubilin (Rattus norvegicus)	NA	NA	NA	K08076	O	Posttranslational modification, protein turnover, chaperones	PF00431
pdam_00001122	0.1738	-0.000776128	0.249854	0.594772	0.998836	0.245834	NA	NA	NA	NA	nek8: Serine/threonine-protein kinase Nek8 (Danio rerio)	GO:0004672, GO:0005524, GO:0006468	GO:0000902,GO:0003674,GO:0003824,GO:0004672,GO:0004674,GO:0004702,GO:0004871,GO:0005057,GO:0006464,GO:0006468,GO:0006793,GO:0006796,GO:0007154,GO:0007165,GO:0007275,GO:0007399,GO:0008150,GO:0008152,GO:0009653,GO:0009987,GO:0016043,GO:0016301,GO:0016310,GO:0016740,GO:0016772,GO:0016773,GO:0019538,GO:0022008,GO:0023014,GO:0023052,GO:0030030,GO:0030154,GO:0030182,GO:0031175,GO:0032501,GO:0032502,GO:…	NA	K08857,K18633	T	Signal transduction mechanisms	PF00069, PF00415, PF14252
pdam_00001123	0.193655	-0.0944822	0.0317321	0.490251	0.775333	0.885328	NA	NA	NA	APC	Apc: Adenomatous polyposis coli protein (Mus musculus)	GO:0005488, GO:0005515, GO:0008013, GO:0030178	GO:0000003,GO:0000075,GO:0000079,GO:0000139,GO:0000226,GO:0000278,GO:0000280,GO:0000281,GO:0000775,GO:0000776,GO:0000820,GO:0000902,GO:0000904,GO:0000910,GO:0001501,GO:0001654,GO:0001655,GO:0001700,GO:0001704,GO:0001706,GO:0001708,GO:0001711,GO:0001714,GO:0001726,GO:0001754,GO:0001756,GO:0001775,GO:0001822,GO:0001889,GO:0001932,GO:0001933,GO:0001942,GO:0001947,GO:0002009,GO:0002119,GO:0002164,GO:…	K02085	K02085	NA	NA	PF00514
pdam_00001124	0.0244404	-0.160223	-0.191448	0.866392	0.0990253	0.0135352	NA	NA	Downregulated	NA	Epg5: Ectopic P granules protein 5 homolog (Mus musculus)	GO:0006914	GO:0005575,GO:0005622,GO:0005623,GO:0005737,GO:0007154,GO:0007267,GO:0008150,GO:0009987,GO:0023052,GO:0030154,GO:0032502,GO:0040011,GO:0040012,GO:0040017,GO:0044424,GO:0044464,GO:0044699,GO:0044700,GO:0044763,GO:0045165,GO:0045168,GO:0046331,GO:0048518,GO:0048869,GO:0050789,GO:0065007	K23883	NA	O	Posttranslational modification, protein turnover, chaperones	NA
pdam_00001125	-0.051305	0.181432	-0.0503542	0.9003	0.589224	0.839083	NA	NA	NA	MESDC2	Mesdc2: LDLR chaperone MESD (Mus musculus)	GO:0006457	GO:0000003,GO:0005575,GO:0005622,GO:0005623,GO:0005737,GO:0005783,GO:0005788,GO:0005886,GO:0006457,GO:0006605,GO:0006612,GO:0006810,GO:0006886,GO:0006888,GO:0007154,GO:0007165,GO:0007166,GO:0007275,GO:0007276,GO:0007292,GO:0007444,GO:0007498,GO:0008104,GO:0008150,GO:0008152,GO:0009888,GO:0009987,GO:0015031,GO:0016020,GO:0016055,GO:0016192,GO:0016482,GO:0019538,GO:0019953,GO:0022414,GO:0023052,GO:…	NA	K03032	O	Posttranslational modification, protein turnover, chaperones	PF10185
pdam_00001129	-0.239025	0.111396	1.17773	NA	NA	NA	NA	NA	NA	NA	DMBT1: Deleted in malignant brain tumors 1 protein (Sus scrofa)	NA	NA	NA	NA	T	Signal transduction mechanisms	PF00431, PF13385
pdam_00001130	-0.212222	-0.27399	0.512125	0.5602	0.415763	0.023894	NA	NA	Upregulated	NA	unknown function	NA	NA	NA	NA	NA	NA	NA
pdam_00001132	-0.357713	0.0978118	-0.496737	0.297913	0.828933	0.0400784	NA	NA	Downregulated	SUSD2	Mucin-like protein (Fragment) (Acropora millepora)	NA	GO:0000003,GO:0002119,GO:0002164,GO:0005575,GO:0005911,GO:0005918,GO:0005920,GO:0006810,GO:0006897,GO:0006898,GO:0007043,GO:0007275,GO:0008150,GO:0009791,GO:0009987,GO:0016020,GO:0016043,GO:0016192,GO:0019991,GO:0022607,GO:0030054,GO:0032501,GO:0032502,GO:0034329,GO:0034330,GO:0040007,GO:0040008,GO:0040009,GO:0040010,GO:0043296,GO:0043297,GO:0044085,GO:0044699,GO:0044707,GO:0044763,GO:0045216,GO:…	NA	NA	W	Extracellular structures	PF00084, PF00094, PF03782
pdam_00001135	-0.0599864	0.215551	0.0904291	0.900486	0.571392	0.75319	NA	NA	NA	NA	unknown function	NA	NA	NA	NA	NA	NA	NA
pdam_00001138	-0.248199	0.235756	-0.215208	0.518386	0.544784	0.4293	NA	NA	NA	NA	unknown function	NA	NA	NA	NA	NA	NA	NA
pdam_00001139	-0.1517	0.117728	-0.307961	0.784377	0.847658	0.371552	NA	NA	NA	NA	unknown function	NA	NA	NA	NA	NA	NA	NA
pdam_00001140	-0.102813	0.342669	-0.143513	0.861019	0.459378	0.688412	NA	NA	NA	NA	unknown function	NA	NA	NA	NA	NA	NA	NA
pdam_00001141	-0.146752	-0.176203	-0.108125	0.39624	0.271918	0.39551	NA	NA	NA	MYCBPAP	Mycbpap: MYCBP-associated protein (Rattus norvegicus)	NA	GO:0000003,GO:0003008,GO:0005575,GO:0005622,GO:0005623,GO:0005737,GO:0005886,GO:0007154,GO:0007267,GO:0007268,GO:0007276,GO:0007283,GO:0007600,GO:0007605,GO:0008150,GO:0009987,GO:0016020,GO:0019226,GO:0019897,GO:0019898,GO:0019953,GO:0022414,GO:0023052,GO:0032501,GO:0032504,GO:0035637,GO:0044424,GO:0044425,GO:0044459,GO:0044464,GO:0044699,GO:0044700,GO:0044702,GO:0044707,GO:0044763,GO:0048232,GO:…	NA	NA	NA	NA	PF14646
pdam_00001142	0.080411	-0.0501586	-0.274065	0.70252	0.831054	0.0282628	NA	NA	Downregulated	SMAD4	Smad4: Mothers against decapentaplegic homolog 4 (Mus musculus)	GO:0003700, GO:0005515, GO:0005622, GO:0005667, GO:0006355, GO:0007179	GO:0000003,GO:0000122,GO:0000578,GO:0000902,GO:0000904,GO:0000975,GO:0000976,GO:0000987,GO:0000988,GO:0000989,GO:0001067,GO:0001071,GO:0001076,GO:0001159,GO:0001558,GO:0001655,GO:0001656,GO:0001657,GO:0001658,GO:0001666,GO:0001701,GO:0001702,GO:0001756,GO:0001763,GO:0001775,GO:0001817,GO:0001822,GO:0001837,GO:0001932,GO:0001934,GO:0002009,GO:0002119,GO:0002164,GO:0002165,GO:0003002,GO:0003006,GO:…	K04501	K04501	NA	NA	PF03165, PF03166
pdam_00001143	0.432139	0.122408	-0.285725	0.33722	0.837822	0.405108	NA	NA	NA	TARBP1	TARBP1: Probable methyltransferase TARBP1 (Homo sapiens)	GO:0003723, GO:0005488, GO:0006396, GO:0008173	GO:0001510,GO:0003674,GO:0003676,GO:0003723,GO:0003824,GO:0005488,GO:0005575,GO:0005622,GO:0005623,GO:0005634,GO:0005737,GO:0006139,GO:0006355,GO:0006357,GO:0006396,GO:0006399,GO:0006400,GO:0006725,GO:0006807,GO:0007275,GO:0008033,GO:0008150,GO:0008152,GO:0008168,GO:0008173,GO:0008175,GO:0008757,GO:0009451,GO:0009790,GO:0009792,GO:0009889,GO:0009987,GO:0010467,GO:0010468,GO:0010556,GO:0016070,GO:…	K15333	K15086,K15333	A	RNA processing and modification	PF00588
pdam_00001146	-0.137891	0.527256	1.46202	0.825941	0.26203	1.08277e-05	NA	NA	Upregulated	SLC6A15	Slc6a19: Sodium-dependent neutral amino acid transporter B(0)AT1 (Mus musculus)	GO:0005328, GO:0006836, GO:0016021	GO:0003333,GO:0003674,GO:0005215,GO:0005283,GO:0005298,GO:0005326,GO:0005342,GO:0005343,GO:0005416,GO:0005575,GO:0005622,GO:0005623,GO:0005737,GO:0005886,GO:0006810,GO:0006811,GO:0006812,GO:0006814,GO:0006820,GO:0006836,GO:0006865,GO:0006950,GO:0006970,GO:0006972,GO:0007584,GO:0008021,GO:0008150,GO:0008324,GO:0008509,GO:0008514,GO:0009605,GO:0009628,GO:0009987,GO:0009991,GO:0012506,GO:0015075,GO:…	NA	K05034,K05038,K05039,K05048,K05334	P	Inorganic ion transport and metabolism	PF002090
pdam_00001147	0.249648	-0.190729	-0.473311	0.473421	0.606245	0.0456309	NA	NA	Downregulated	SLC6A15	Slc6a18: Sodium-dependent neutral amino acid transporter B(0)AT3 (Mus musculus)	GO:0005328, GO:0006836, GO:0016021	GO:0003333,GO:0003674,GO:0005215,GO:0005283,GO:0005298,GO:0005326,GO:0005342,GO:0005343,GO:0005416,GO:0005575,GO:0005622,GO:0005623,GO:0005737,GO:0005886,GO:0006810,GO:0006811,GO:0006812,GO:0006814,GO:0006820,GO:0006836,GO:0006865,GO:0006950,GO:0006970,GO:0006972,GO:0007584,GO:0008021,GO:0008150,GO:0008324,GO:0008509,GO:0008514,GO:0009605,GO:0009628,GO:0009987,GO:0009991,GO:0012506,GO:0015075,GO:…	K05048	K05034,K05038,K05039,K05048,K05334	P	Inorganic ion transport and metabolism	PF002090
pdam_00001149	-0.200027	-0.108895	-0.259038	0.117026	0.433434	0.00622235	NA	NA	Downregulated	TLL1	tll1: Dorsal-ventral patterning tolloid-like protein 1 (Danio rerio)	NA	GO:0000902,GO:0000904,GO:0001501,GO:0001568,GO:0001704,GO:0001707,GO:0001885,GO:0001944,GO:0002064,GO:0002165,GO:0002376,GO:0002520,GO:0003002,GO:0003158,GO:0003674,GO:0003824,GO:0004175,GO:0004222,GO:0005488,GO:0005515,GO:0005518,GO:0005575,GO:0005576,GO:0005622,GO:0005623,GO:0005634,GO:0006508,GO:0006928,GO:0006935,GO:0007275,GO:0007369,GO:0007389,GO:0007399,GO:0007409,GO:0007411,GO:0007414,GO:…	NA	K08076,K09608,K13046,K14616	O	Posttranslational modification, protein turnover, chaperones	PF00431
pdam_00001150	0.116852	-0.175008	-0.2961	0.684565	0.508421	0.0984882	NA	NA	NA	NA	LRRC74A: Leucine-rich repeat-containing protein 74A (Homo sapiens)	GO:0003676, GO:0005515	NA	NA	NA	O	Posttranslational modification, protein turnover, chaperones	PF13516
pdam_00001152	-0.553639	-0.653622	-2.64806	0.423682	0.314641	3.42832e-09	NA	NA	Downregulated	NA	unknown function	NA	NA	NA	NA	NA	NA	NA
pdam_00001154	-0.0621269	0.168101	-0.0445209	0.808164	0.417247	0.789602	NA	NA	NA	SUSD2	mesh: Protein mesh (Drosophila melanogaster)	GO:0007160	GO:0000003,GO:0002119,GO:0002164,GO:0005575,GO:0005911,GO:0005918,GO:0005920,GO:0006810,GO:0006897,GO:0006898,GO:0007043,GO:0007275,GO:0008150,GO:0009791,GO:0009987,GO:0016020,GO:0016043,GO:0016192,GO:0019991,GO:0022607,GO:0030054,GO:0032501,GO:0032502,GO:0034329,GO:0034330,GO:0040007,GO:0040008,GO:0040009,GO:0040010,GO:0043296,GO:0043297,GO:0044085,GO:0044699,GO:0044707,GO:0044763,GO:0045216,GO:…	NA	NA	W	Extracellular structures	PF00084, PF00094, PF03782, PF06119
pdam_00001155	-0.429084	-0.473667	-1.02423	0.170576	0.0993751	4.99294e-06	NA	NA	Downregulated	TLL1	Cdcp2: CUB domain-containing protein 2 (Mus musculus)	NA	GO:0000323,GO:0000902,GO:0000904,GO:0001501,GO:0001502,GO:0001503,GO:0001568,GO:0001701,GO:0001704,GO:0001707,GO:0001885,GO:0001894,GO:0001944,GO:0002064,GO:0002165,GO:0002376,GO:0002520,GO:0003002,GO:0003158,GO:0003674,GO:0003824,GO:0004175,GO:0004222,GO:0004872,GO:0005215,GO:0005488,GO:0005515,GO:0005518,GO:0005575,GO:0005576,GO:0005578,GO:0005615,GO:0005622,GO:0005623,GO:0005634,GO:0005737,GO:…	NA	K05502,K08076,K09608,K13046,K13047,K14616	O	Posttranslational modification, protein turnover, chaperones	PF00431
pdam_00001156	-0.325449	-0.609583	-1.44018	0.146191	0.000530684	4.22924e-18	NA	Downregulated	Downregulated	NA	Cubn: Cubilin (Mus musculus)	NA	NA	NA	NA	O	Posttranslational modification, protein turnover, chaperones	PF00431
pdam_00001157	0.225052	-0.0236814	-0.188053	0.60261	0.971887	0.529266	NA	NA	NA	NA	unknown function	NA	NA	NA	NA	NA	NA	NA
pdam_00001158	-0.232072	-0.134873	0.152059	0.471783	0.700607	0.510697	NA	NA	NA	NA	Uncharacterized skeletal organic matrix protein 5 (Acropora millepora)	NA	NA	NA	NA	NA	NA	NA
pdam_00001159	-0.232841	-0.253805	-0.0114417	0.255912	0.184072	0.949228	NA	NA	NA	GAA	Gaa: Lysosomal alpha-glucosidase (Mus musculus)	GO:0003824, GO:0004222, GO:0004553, GO:0005975, GO:0006508, GO:0008237, GO:0030246	GO:0000023,GO:0000272,GO:0000323,GO:0002026,GO:0002086,GO:0003007,GO:0003008,GO:0003009,GO:0003011,GO:0003012,GO:0003013,GO:0003015,GO:0003016,GO:0003205,GO:0003206,GO:0003208,GO:0003229,GO:0003231,GO:0003674,GO:0003824,GO:0004553,GO:0004558,GO:0005488,GO:0005575,GO:0005622,GO:0005623,GO:0005737,GO:0005764,GO:0005765,GO:0005773,GO:0005774,GO:0005975,GO:0005976,GO:0005977,GO:0005980,GO:0005984,GO:…	K12316	K01203,K12047,K12316,K17926	G	Carbohydrate transport and metabolism	PF00088, PF01055, PF01562, PF13574, PF13802, PF16863
pdam_00001160	-0.396907	-0.158406	-0.456767	0.0364151	0.479452	0.0021829	Downregulated	NA	Downregulated	NA	unknown function	NA	NA	NA	NA	NA	NA	NA
pdam_00001163	0.162796	-0.0823448	-0.465748	0.740768	0.885484	0.114265	NA	NA	NA	KIF23	KIF23: Kinesin-like protein KIF23 (Homo sapiens)	GO:0000910, GO:0000915, GO:0003777, GO:0005524, GO:0007018, GO:0008017, GO:0072383	GO:0000003,GO:0000022,GO:0000090,GO:0000092,GO:0000166,GO:0000226,GO:0000278,GO:0000279,GO:0000280,GO:0000910,GO:0000912,GO:0000915,GO:0000916,GO:0001709,GO:0001882,GO:0001883,GO:0002376,GO:0002478,GO:0002495,GO:0002504,GO:0003674,GO:0003774,GO:0003777,GO:0003824,GO:0005488,GO:0005515,GO:0005524,GO:0005575,GO:0005576,GO:0005622,GO:0005623,GO:0005634,GO:0005654,GO:0005737,GO:0005813,GO:0005815,GO:…	K17387	K10402,K17387,K18703	Z	Cytoskeleton	PF00225, PF16540
pdam_00001164	0.0140193	0.122815	0.195061	0.968971	0.671817	0.294414	NA	NA	NA	ILF2	ilf2: Interleukin enhancer-binding factor 2 homolog (Xenopus tropicalis)	GO:0003723, GO:0005524, GO:0006955, GO:0016740	GO:0000375,GO:0000377,GO:0000398,GO:0003674,GO:0003676,GO:0003677,GO:0003723,GO:0003725,GO:0005488,GO:0005575,GO:0005622,GO:0005623,GO:0005634,GO:0005681,GO:0005730,GO:0005737,GO:0006139,GO:0006351,GO:0006355,GO:0006396,GO:0006397,GO:0006725,GO:0006807,GO:0008150,GO:0008152,GO:0008380,GO:0009058,GO:0009059,GO:0009889,GO:0009891,GO:0009893,GO:0009987,GO:0010467,GO:0010468,GO:0010556,GO:0010557,GO:…	K13089	K13089	K	Transcription	PF07528
pdam_00001165	0.12533	0.11683	0.194191	0.49823	0.532895	0.119571	NA	NA	NA	METTL13	METTL13: Methyltransferase-like protein 13 (Homo sapiens)	NA	GO:0003674,GO:0005488,GO:0005515	NA	NA	E	Amino acid transport and metabolism	PF01564, PF13649
pdam_00001166	0.285459	0.0745119	0.533378	0.111927	0.753587	4.10672e-05	NA	NA	Upregulated	OAZ2	OAZ: Ornithine decarboxylase antizyme 1 (Gallus gallus)	GO:0008073	GO:0000003,GO:0003674,GO:0004857,GO:0005575,GO:0005622,GO:0005623,GO:0005634,GO:0005737,GO:0005829,GO:0006082,GO:0006520,GO:0006521,GO:0006576,GO:0006591,GO:0006595,GO:0006596,GO:0006807,GO:0007276,GO:0007283,GO:0008073,GO:0008150,GO:0008152,GO:0009058,GO:0009308,GO:0009309,GO:0009889,GO:0009987,GO:0010565,GO:0010967,GO:0019222,GO:0019752,GO:0019953,GO:0022414,GO:0030154,GO:0030234,GO:0031323,GO:…	K16548	K16548,K16613,K16614	E	Amino acid transport and metabolism	PF02100
pdam_00001167	-0.698069	-0.23932	-0.876458	0.104656	0.649019	0.00640049	NA	NA	Downregulated	FG11164.1	CUB and peptidase domain-containing protein 1 (Fragment) (Acropora millepora)	GO:0004252, GO:0006508	GO:0003674,GO:0003824,GO:0004175,GO:0004252,GO:0005575,GO:0005576,GO:0006508,GO:0008150,GO:0008152,GO:0008233,GO:0008236,GO:0016787,GO:0017171,GO:0019538,GO:0043170,GO:0044238,GO:0070011,GO:0071704	K01312	K01312	E	Amino acid transport and metabolism	PF00089
pdam_00001168	-0.0100695	0.0695986	-0.014083	0.983437	0.882696	0.962421	NA	NA	NA	NA	unknown function	NA	NA	NA	NA	NA	NA	PF03281
pdam_00001181	0.254812	0.152967	0.36244	0.038281	0.243573	0.000141438	Upregulated	NA	Upregulated	PNPLA4	PNPLA4: Patatin-like phospholipase domain-containing protein 4 (Homo sapiens)	GO:0003676, GO:0006351, GO:0006379, GO:0006629, GO:0008152, GO:0008270, GO:0016042, GO:0016787	NA	K11157	K11157	U	Intracellular trafficking, secretion, and vesicular transport	PF01096, PF01734
pdam_00001183	0.0563643	-0.062657	0.039151	0.803737	0.787054	0.792465	NA	NA	NA	BCOR	Bcorl1: BCL-6 corepressor-like protein 1 (Mus musculus)	GO:0005515	GO:0000122,GO:0000414,GO:0000415,GO:0000975,GO:0000988,GO:0000989,GO:0001067,GO:0001654,GO:0003002,GO:0003674,GO:0003676,GO:0003677,GO:0003712,GO:0003714,GO:0005488,GO:0005515,GO:0005575,GO:0005622,GO:0005623,GO:0005634,GO:0005819,GO:0005856,GO:0005874,GO:0005876,GO:0006325,GO:0006355,GO:0006357,GO:0006464,GO:0006513,GO:0006996,GO:0007275,GO:0007389,GO:0007399,GO:0007423,GO:0007444,GO:0007447,GO:…	K23215	NA	T	Signal transduction mechanisms	PF12796, PF16553
pdam_00001184	-0.0220594	0.0980676	0.719503	0.908987	0.524495	2.36572e-14	NA	NA	Upregulated	ATP6AP2	Atp6ap2: Renin receptor (Rattus norvegicus)	GO:0004872, GO:0016021	GO:0001664,GO:0001736,GO:0001737,GO:0001738,GO:0001817,GO:0001819,GO:0001889,GO:0001990,GO:0001991,GO:0002002,GO:0002003,GO:0002009,GO:0002119,GO:0002164,GO:0002165,GO:0003008,GO:0003013,GO:0003044,GO:0003073,GO:0003081,GO:0003674,GO:0005102,GO:0005109,GO:0005110,GO:0005488,GO:0005515,GO:0005575,GO:0005622,GO:0005623,GO:0005737,GO:0005773,GO:0005774,GO:0005886,GO:0006810,GO:0006811,GO:0006812,GO:…	K19514	K19514	C	Energy production and conversion	PF07850
pdam_00001185	-0.213783	0.0246504	0.00535394	0.520839	0.96204	0.983921	NA	NA	NA	NA	unknown function	NA	NA	NA	NA	NA	NA	NA
pdam_00001188	-0.217743	0.026956	0.0142365	0.332897	0.934032	0.940251	NA	NA	NA	NA	DSTYK: Dual serine/threonine and tyrosine protein kinase (Strongylocentrotus purpuratus)	GO:0004672, GO:0005524, GO:0006468	NA	NA	K16288	T	Signal transduction mechanisms	PF00069, PF00350, PF16975
pdam_00001193	-0.112933	0.0054675	-0.256127	0.691323	0.990171	0.14231	NA	NA	NA	NA	unknown function	NA	NA	NA	NA	NA	NA	NA
pdam_00001194	-0.120507	-0.020271	-0.347877	0.739382	0.967978	0.111575	NA	NA	NA	NA	DSTYK: Dual serine/threonine and tyrosine protein kinase (Gallus gallus)	GO:0004672, GO:0005524, GO:0006468	NA	NA	K16288	T	Signal transduction mechanisms	PF00069, PF07714
pdam_00001195	-0.213575	0.0300631	-0.365694	0.677146	0.966712	0.26371	NA	NA	NA	NA	DSTYK: Dual serine/threonine and tyrosine protein kinase (Canis lupus familiaris)	NA	NA	NA	NA	T	Signal transduction mechanisms	NA
pdam_00001197	-0.263748	-0.149045	-0.48223	0.226382	0.536115	0.00161539	NA	NA	Downregulated	DSTYK	dstyk: Dual serine/threonine and tyrosine protein kinase (Xenopus laevis)	GO:0004672, GO:0005524, GO:0006468	GO:0000003,GO:0000165,GO:0000186,GO:0000187,GO:0000902,GO:0001700,GO:0001932,GO:0001934,GO:0002009,GO:0002165,GO:0003006,GO:0003674,GO:0003824,GO:0004672,GO:0004674,GO:0004702,GO:0004706,GO:0004709,GO:0004712,GO:0004871,GO:0005057,GO:0005488,GO:0005515,GO:0005575,GO:0005622,GO:0005623,GO:0005634,GO:0005737,GO:0005856,GO:0006464,GO:0006468,GO:0006793,GO:0006796,GO:0006950,GO:0007154,GO:0007165,GO:…	NA	K04417,K16288	T	Signal transduction mechanisms	PF00069, PF00350
pdam_00001199	-0.224707	0.129457	-0.478987	0.640022	0.810992	0.110634	NA	NA	NA	NA	Dstyk: Dual serine/threonine and tyrosine protein kinase (Rattus norvegicus)	GO:0004672, GO:0005524, GO:0006468	NA	NA	NA	NA	NA	PF00069, PF00350
pdam_00001201	-0.229236	0.11784	0.0333686	0.173748	0.539528	0.816085	NA	NA	NA	NA	Profilin (Clypeaster japonicus)	GO:0003779	GO:0005575,GO:0005622,GO:0005623,GO:0005856,GO:0043226,GO:0043228,GO:0043229,GO:0043232,GO:0044424,GO:0044464	NA	K05759	NA	NA	PF00235
pdam_00001202	0.187889	-0.506705	-0.647592	0.621219	0.0856851	0.00515859	NA	NA	Downregulated	NA	Moxd1: DBH-like monooxygenase protein 1 (Mus musculus)	NA	NA	NA	NA	NA	NA	PF03351
pdam_00001210	0.304141	0.160146	0.245546	0.144672	0.492567	0.120985	NA	NA	NA	RASA2	RASA3: Ras GTPase-activating protein 3 (Homo sapiens)	GO:0007165, GO:0035556, GO:0043087	GO:0000003,GO:0000278,GO:0000280,GO:0000578,GO:0002165,GO:0002262,GO:0002376,GO:0002520,GO:0002574,GO:0003002,GO:0003674,GO:0005083,GO:0005096,GO:0005099,GO:0005215,GO:0005216,GO:0005261,GO:0005262,GO:0005575,GO:0005622,GO:0005623,GO:0005737,GO:0005886,GO:0006140,GO:0006355,GO:0006357,GO:0006810,GO:0006811,GO:0006812,GO:0006816,GO:0006996,GO:0007049,GO:0007059,GO:0007062,GO:0007067,GO:0007126,GO:…	K12380	K08053,K12380	T	Signal transduction mechanisms	PF00168, PF00169, PF00616, PF00779
pdam_00001211	-0.170121	0.116929	0.384001	0.446171	0.617068	0.00774138	NA	NA	Upregulated	KIAA1704	GPALPP1: GPALPP motifs-containing protein 1 (Homo sapiens)	NA	NA	NA	NA	NA	NA	PF12572
pdam_00001212	0.0260951	0.213204	0.41127	0.942205	0.401099	0.018883	NA	NA	Upregulated	PIN4	pin4: Peptidyl-prolyl cis-trans isomerase NIMA-interacting 4 (Danio rerio)	GO:0016853	GO:0000413,GO:0003674,GO:0003676,GO:0003677,GO:0003681,GO:0003690,GO:0003755,GO:0003824,GO:0005488,GO:0005575,GO:0005622,GO:0005623,GO:0005634,GO:0005730,GO:0005737,GO:0005739,GO:0005759,GO:0005819,GO:0005856,GO:0005886,GO:0006139,GO:0006364,GO:0006396,GO:0006464,GO:0006725,GO:0006807,GO:0008150,GO:0008152,GO:0009987,GO:0010467,GO:0015630,GO:0016020,GO:0016070,GO:0016072,GO:0016853,GO:0016859,GO:…	K09579	K03771,K09579,K17601	O	Posttranslational modification, protein turnover, chaperones	PF13616
pdam_00001214	-0.0588659	0.002722	-0.324805	0.836453	0.995512	0.0390007	NA	NA	Downregulated	NA	SLC5A8: Sodium-coupled monocarboxylate transporter 1 (Homo sapiens)	GO:0005215, GO:0006810, GO:0016020, GO:0055085	GO:0003674,GO:0005215,GO:0005575,GO:0006461,GO:0006810,GO:0006811,GO:0006812,GO:0006814,GO:0006996,GO:0007010,GO:0008150,GO:0008324,GO:0008523,GO:0009653,GO:0009987,GO:0010927,GO:0015075,GO:0015077,GO:0015081,GO:0015291,GO:0015293,GO:0015294,GO:0015370,GO:0015672,GO:0016020,GO:0016021,GO:0016043,GO:0022607,GO:0022804,GO:0022857,GO:0022890,GO:0022891,GO:0022892,GO:0030001,GO:0030029,GO:0030036,GO:…	NA	K14388	P	Inorganic ion transport and metabolism	PF00474
pdam_00001220	0.0897179	-0.0996085	0.0792469	0.492186	0.427758	0.395059	NA	NA	NA	WDR44	wdr44: WD repeat-containing protein 44 (Xenopus laevis)	GO:0005515	GO:0000922,GO:0003674,GO:0005488,GO:0005515,GO:0005575,GO:0005622,GO:0005623,GO:0005634,GO:0005737,GO:0005768,GO:0005783,GO:0005789,GO:0005802,GO:0005815,GO:0005816,GO:0005819,GO:0005829,GO:0005856,GO:0005874,GO:0008150,GO:0010008,GO:0012505,GO:0015630,GO:0016020,GO:0017016,GO:0017137,GO:0019899,GO:0030334,GO:0031090,GO:0031267,GO:0032153,GO:0032879,GO:0032991,GO:0040008,GO:0040009,GO:0040010,GO:…	K20241	K14820	T	Signal transduction mechanisms	PF00400
pdam_00001221	-0.169135	0.0326948	-0.0882545	0.532061	0.927028	0.655653	NA	NA	NA	GRTP1	Grtp1: Growth hormone-regulated TBC protein 1 (Rattus norvegicus)	NA	GO:0000131,GO:0000133,GO:0000322,GO:0000323,GO:0000324,GO:0000329,GO:0003674,GO:0005083,GO:0005096,GO:0005097,GO:0005099,GO:0005575,GO:0005622,GO:0005623,GO:0005737,GO:0005768,GO:0005770,GO:0005773,GO:0005774,GO:0005829,GO:0005886,GO:0005933,GO:0005934,GO:0005935,GO:0005938,GO:0006140,GO:0006810,GO:0006887,GO:0006897,GO:0006996,GO:0007010,GO:0007015,GO:0008047,GO:0008150,GO:0009118,GO:0009894,GO:…	K19953	K19951,K19953	U	Intracellular trafficking, secretion, and vesicular transport	PF00566
pdam_00001222	0.0282423	-0.195789	-0.303357	0.881476	0.118253	0.0018167	NA	NA	Downregulated	GLB1L2	Glb1l3: Beta-galactosidase-1-like protein 3 (Rattus norvegicus)	GO:0004553, GO:0004565, GO:0005975	GO:0005575,GO:0005576	NA	K12309	G	Carbohydrate transport and metabolism	PF01301
pdam_00001223	0.19516	-0.0623981	-0.394602	0.301448	0.795839	0.00314437	NA	NA	Downregulated	GLB1L2	GLB1L2: Beta-galactosidase-1-like protein 2 (Homo sapiens)	GO:0004553, GO:0004565, GO:0005975	GO:0005575,GO:0005576	NA	K12309	G	Carbohydrate transport and metabolism	PF01301
pdam_00001224	0.00845826	-0.0587135	0.559367	0.987749	0.916506	0.0398366	NA	NA	Upregulated	NA	Gm614: Uncharacterized protein CXorf65 homolog (Mus musculus)	NA	NA	NA	NA	NA	NA	PF15874
pdam_00001225	-0.234751	-0.245672	-0.794547	0.38226	0.34219	8.51237e-06	NA	NA	Downregulated	NA	unknown function	GO:0003676	NA	NA	NA	NA	NA	NA
pdam_00001226	-0.364248	-0.137592	-0.386919	0.0411096	0.530325	0.00570048	Downregulated	NA	Downregulated	FAM21D	Washc2: WASH complex subunit 2 (Cricetulus griseus)	GO:0071203	GO:0005575,GO:0005622,GO:0005623,GO:0005737,GO:0005768,GO:0005769,GO:0005886,GO:0006810,GO:0008150,GO:0009987,GO:0010008,GO:0016020,GO:0016192,GO:0016197,GO:0031090,GO:0031901,GO:0032991,GO:0042147,GO:0043226,GO:0043227,GO:0043229,GO:0043231,GO:0043234,GO:0044422,GO:0044424,GO:0044440,GO:0044444,GO:0044446,GO:0044464,GO:0044699,GO:0044763,GO:0044765,GO:0046907,GO:0051179,GO:0051234,GO:0051641,GO:…	K18462	K18462	U	Intracellular trafficking, secretion, and vesicular transport	PF15255
pdam_00001227	0.20725	0.00524862	0.215211	0.160454	0.984215	0.0485679	NA	NA	Upregulated	ROBO2	ROBO2: Roundabout homolog 2 (Homo sapiens)	GO:0005515, GO:0007411, GO:0007507, GO:0035385	GO:0000003,GO:0000902,GO:0000904,GO:0001554,GO:0001558,GO:0001655,GO:0001656,GO:0001657,GO:0001667,GO:0001708,GO:0001764,GO:0001822,GO:0001964,GO:0003002,GO:0003006,GO:0003007,GO:0003008,GO:0003151,GO:0003674,GO:0004871,GO:0004872,GO:0004888,GO:0005488,GO:0005515,GO:0005539,GO:0005575,GO:0005623,GO:0005886,GO:0005887,GO:0006915,GO:0006928,GO:0006935,GO:0007154,GO:0007155,GO:0007156,GO:0007165,GO:…	K06754	K06754	T	Signal transduction mechanisms	PF00041, PF07679, PF13927
pdam_00001228	0.0911408	-0.160577	-0.20523	0.740843	0.515144	0.22635	NA	NA	NA	SIDT1	SIDT1: SID1 transmembrane family member 1 (Homo sapiens)	GO:0016021, GO:0033227, GO:0051033	GO:0000323,GO:0003674,GO:0005488,GO:0005496,GO:0005575,GO:0005622,GO:0005623,GO:0005737,GO:0005764,GO:0005768,GO:0005773,GO:0005794,GO:0005886,GO:0006810,GO:0006869,GO:0008150,GO:0008289,GO:0009987,GO:0010876,GO:0015485,GO:0015850,GO:0015918,GO:0016020,GO:0030301,GO:0031410,GO:0031982,GO:0032934,GO:0033036,GO:0035376,GO:0035382,GO:0036094,GO:0043178,GO:0043226,GO:0043227,GO:0043229,GO:0043231,GO:…	NA	NA	U	Intracellular trafficking, secretion, and vesicular transport	PF13965
pdam_00001229	-0.083792	0.276733	0.484622	0.72292	0.108247	0.000266709	NA	NA	Upregulated	NA	FAM234B: Protein FAM234B (Gallus gallus)	NA	NA	NA	NA	NA	NA	NA
pdam_00001230	0.189823	0.0403929	0.162612	0.484573	0.91114	0.404857	NA	NA	NA	FBXO3	FBXO3: F-box only protein 3 (Bos taurus)	GO:0005515	GO:0000151,GO:0003674,GO:0003824,GO:0004842,GO:0005575,GO:0005622,GO:0005623,GO:0005634,GO:0006464,GO:0006508,GO:0008150,GO:0008152,GO:0009987,GO:0016567,GO:0016874,GO:0016879,GO:0016881,GO:0019005,GO:0019538,GO:0019787,GO:0031461,GO:0032446,GO:0032991,GO:0036211,GO:0043170,GO:0043226,GO:0043227,GO:0043229,GO:0043231,GO:0043234,GO:0043412,GO:0044237,GO:0044238,GO:0044260,GO:0044267,GO:0044424,GO:…	K10290	K10290	P	Inorganic ion transport and metabolism	PF04379, PF09346, PF129379
pdam_00001232	-0.199945	-0.33023	-0.180421	0.58393	0.30115	0.474714	NA	NA	NA	NA	unknown function	NA	NA	NA	NA	NA	NA	PF06937
pdam_00001233	-0.0807652	-0.185747	-0.323396	0.709614	0.291978	0.0108555	NA	NA	Downregulated	NA	KIF16B: Kinesin-like protein KIF16B (Homo sapiens)	GO:0003777, GO:0005515, GO:0005524, GO:0007018, GO:0008017	NA	NA	K04648	Z	Cytoskeleton	PF00169, PF00225
pdam_00001236	-0.0403272	-0.277118	-0.671216	0.933174	0.431468	0.00470349	NA	NA	Downregulated	COL18A1	Fzd4: Frizzled-4 (Mus musculus)	GO:0005515	NA	NA	NA	U	Intracellular trafficking, secretion, and vesicular transport	PF01392
pdam_00001237	0.309964	0.427203	0.760791	0.339184	0.139386	0.000524353	NA	NA	Upregulated	NA	Fzd8: Frizzled-8 (Rattus norvegicus)	GO:0005515	NA	NA	NA	NA	NA	PF01392
pdam_00001238	-0.0758517	0.257542	0.519533	0.771345	0.194607	0.000402816	NA	NA	Upregulated	NA	unc-89: Muscle M-line assembly protein unc-89 (Caenorhabditis elegans)	GO:0005515	NA	NA	NA	NA	NA	PF01392
pdam_00001239	-0.144224	-0.0769152	0.00750998	0.530313	0.771297	0.967868	NA	NA	NA	NA	unknown function	GO:0005515	NA	NA	NA	NA	NA	PF01392
pdam_00001241	0.019246	-0.752553	-1.66412	0.980801	0.130255	9.46386e-06	NA	NA	Downregulated	NA	unknown function	GO:0005515	NA	NA	NA	NA	NA	PF01392
pdam_00001242	-0.125466	-0.109879	-0.0223043	0.768632	0.80939	0.940616	NA	NA	NA	NA	unknown function	GO:0005515	NA	NA	NA	NA	NA	PF01392
pdam_00001243	-0.0153589	-0.188506	-0.345971	0.951852	0.264292	0.00487853	NA	NA	Downregulated	NA	unknown function	GO:0005515	NA	NA	NA	NA	NA	PF01392
pdam_00001245	0.193374	-0.0613015	-0.277647	0.627473	NA	0.299834	NA	NA	NA	NA	mshD: Mycothiol acetyltransferase (Thermomonospora curvata (strain ATCC 19995 / DSM 43183 / JCM 3096 / NBRC 15933 / NCIMB 10081 / Henssen B9))	GO:0008080	NA	NA	NA	K	Transcription	PF00583
pdam_00001246	0.311674	0.118704	-0.246087	0.570642	0.860935	0.523045	NA	NA	NA	MCM7	mcm7: DNA replication licensing factor mcm7 (Xenopus tropicalis)	GO:0003677, GO:0003678, GO:0005524, GO:0005634, GO:0006260, GO:0006270, GO:0042555	GO:0000003,GO:0000075,GO:0000077,GO:0000082,GO:0000084,GO:0000166,GO:0000228,GO:0000278,GO:0000724,GO:0000725,GO:0000727,GO:0000785,GO:0000910,GO:0000988,GO:0000989,GO:0001882,GO:0001883,GO:0003006,GO:0003674,GO:0003676,GO:0003677,GO:0003678,GO:0003682,GO:0003688,GO:0003697,GO:0003712,GO:0003824,GO:0004386,GO:0005488,GO:0005524,GO:0005575,GO:0005622,GO:0005623,GO:0005634,GO:0005654,GO:0005656,GO:…	K02210	K02210	L	Replication, recombination and repair	PF00493, PF14551, PF17207
pdam_00001247	0.219863	-0.016507	-0.397102	0.525476	0.974857	0.0928545	NA	NA	NA	RANBP2	RANBP2: E3 SUMO-protein ligase RanBP2 (Homo sapiens)	GO:0046907	GO:0000003,GO:0000166,GO:0000226,GO:0000236,GO:0000278,GO:0000413,GO:0001882,GO:0001883,GO:0003006,GO:0003674,GO:0003755,GO:0003824,GO:0005488,GO:0005515,GO:0005525,GO:0005575,GO:0005622,GO:0005623,GO:0005634,GO:0005635,GO:0005643,GO:0005737,GO:0005811,GO:0005829,GO:0005856,GO:0005875,GO:0005975,GO:0006403,GO:0006405,GO:0006457,GO:0006464,GO:0006605,GO:0006606,GO:0006607,GO:0006810,GO:0006886,GO:…	K12172	K01802,K03767,K09565,K12172,K15306	U	Intracellular trafficking, secretion, and vesicular transport	PF00638
pdam_00001251	0.255107	0.05468	-0.0843794	0.0899934	0.794192	0.506214	NA	NA	NA	RANBP2	RANBP2: E3 SUMO-protein ligase RanBP2 (Pan troglodytes)	GO:0046907	GO:0000003,GO:0000166,GO:0000226,GO:0000236,GO:0000278,GO:0000413,GO:0001882,GO:0001883,GO:0003006,GO:0003674,GO:0003755,GO:0003824,GO:0005488,GO:0005515,GO:0005525,GO:0005575,GO:0005622,GO:0005623,GO:0005634,GO:0005635,GO:0005643,GO:0005737,GO:0005811,GO:0005829,GO:0005856,GO:0005875,GO:0005975,GO:0006403,GO:0006405,GO:0006457,GO:0006464,GO:0006605,GO:0006606,GO:0006607,GO:0006810,GO:0006886,GO:…	K15306	K01802,K03767,K09565,K12172,K15306	U	Intracellular trafficking, secretion, and vesicular transport	PF00638, PF00641
pdam_00001252	0.204424	0.0304873	-0.0869226	0.140354	0.880977	0.441138	NA	NA	NA	NA	unknown function	NA	NA	NA	NA	NA	NA	NA
pdam_00001253	-0.158966	0.0221873	0.219166	0.381819	0.932068	0.0808023	NA	NA	NA	CWC15	cwc15-a: Protein CWC15 homolog A (Xenopus laevis)	GO:0000398, GO:0005681	GO:0000226,GO:0000278,GO:0000375,GO:0000377,GO:0000398,GO:0003674,GO:0003676,GO:0003723,GO:0005488,GO:0005575,GO:0005622,GO:0005623,GO:0005634,GO:0005681,GO:0005684,GO:0006139,GO:0006396,GO:0006397,GO:0006725,GO:0006807,GO:0006810,GO:0006897,GO:0006898,GO:0006996,GO:0007010,GO:0007017,GO:0007049,GO:0007051,GO:0007052,GO:0007275,GO:0008150,GO:0008152,GO:0008380,GO:0009790,GO:0009792,GO:0009987,GO:…	K12863	K09191,K12863	A	RNA processing and modification	PF04889
pdam_00001254	0.333286	0.179403	0.469743	0.0233416	0.265189	4.33551e-05	Upregulated	NA	Upregulated	SNX24	Snx24: Sorting nexin-24 (Rattus norvegicus)	GO:0035091	GO:0005575,GO:0005622,GO:0005623,GO:0005737,GO:0012506,GO:0016020,GO:0016023,GO:0030659,GO:0031090,GO:0031410,GO:0031982,GO:0031988,GO:0043226,GO:0043227,GO:0043229,GO:0043231,GO:0044422,GO:0044424,GO:0044433,GO:0044444,GO:0044446,GO:0044464	K17941	K17941	U	Intracellular trafficking, secretion, and vesicular transport	PF00787
pdam_00001255	0.0937634	0.0288797	0.189986	0.400928	0.840467	0.0112146	NA	NA	Upregulated	DCUN1D1	DCUN1D1: DCN1-like protein 1 (Homo sapiens)	GO:0005515	GO:0000003,GO:0000151,GO:0000226,GO:0000278,GO:0002119,GO:0002164,GO:0003006,GO:0003674,GO:0003824,GO:0005488,GO:0005515,GO:0005575,GO:0005622,GO:0005623,GO:0005634,GO:0005737,GO:0005829,GO:0006464,GO:0006996,GO:0007010,GO:0007017,GO:0007049,GO:0007051,GO:0007154,GO:0007165,GO:0007275,GO:0007548,GO:0007586,GO:0007610,GO:0008104,GO:0008150,GO:0008152,GO:0009056,GO:0009057,GO:0009719,GO:0009725,GO:…	K17822	K17822	NA	NA	PF03556, PF14555
pdam_00001256	0.036785	0.334838	0.894803	0.930306	0.234948	9.47806e-06	NA	NA	Upregulated	RNF7	Rnf7: RING-box protein 2 (Mus musculus)	GO:0008270	GO:0000003,GO:0000151,GO:0003006,GO:0003674,GO:0003824,GO:0004842,GO:0005488,GO:0005507,GO:0005575,GO:0005622,GO:0005623,GO:0005634,GO:0005737,GO:0006464,GO:0006915,GO:0006919,GO:0006928,GO:0006950,GO:0006979,GO:0006996,GO:0007005,GO:0007154,GO:0007165,GO:0007275,GO:0007548,GO:0008150,GO:0008152,GO:0008219,GO:0008270,GO:0008406,GO:0008631,GO:0008637,GO:0009987,GO:0010941,GO:0010950,GO:0010952,GO:…	K10611	K03868,K10611	O	Posttranslational modification, protein turnover, chaperones	PF12678
pdam_00001257	0.104008	0.347199	0.616928	0.745198	0.146826	0.000655552	NA	NA	Upregulated	PLSCR3	PLSCR2: Phospholipid scramblase 2 (Bos taurus)	NA	GO:0000902,GO:0000981,GO:0000982,GO:0001071,GO:0001077,GO:0001228,GO:0001775,GO:0002237,GO:0002252,GO:0002376,GO:0002520,GO:0002526,GO:0002682,GO:0002684,GO:0002694,GO:0003008,GO:0003674,GO:0003700,GO:0005102,GO:0005154,GO:0005215,GO:0005319,GO:0005488,GO:0005509,GO:0005515,GO:0005548,GO:0005575,GO:0005622,GO:0005623,GO:0005634,GO:0005730,GO:0005737,GO:0005739,GO:0005740,GO:0005794,GO:0005829,GO:…	NA	NA	M	Cell wall/membrane/envelope biogenesis	PF03803
pdam_00001258	-0.290892	-0.360057	-0.412177	0.260119	0.124109	0.024609	NA	NA	Downregulated	TNFSF13	C1QTNF9: Complement C1q and tumor necrosis factor-related protein 9 (Bos taurus)	GO:0005164, GO:0005515, GO:0006955, GO:0016020	GO:0000018,GO:0001667,GO:0001776,GO:0001936,GO:0001938,GO:0002250,GO:0002251,GO:0002252,GO:0002260,GO:0002376,GO:0002377,GO:0002381,GO:0002385,GO:0002426,GO:0002440,GO:0002443,GO:0002449,GO:0002460,GO:0002634,GO:0002636,GO:0002637,GO:0002682,GO:0002684,GO:0002694,GO:0002696,GO:0002697,GO:0002699,GO:0002700,GO:0002703,GO:0002706,GO:0002712,GO:0002819,GO:0002821,GO:0002822,GO:0002824,GO:0002889,GO:…	NA	K05475	T	Signal transduction mechanisms	PF00229, PF01391
pdam_00001259	-1.45033	-1.06988	-2.46763	0.00061596	0.014769	8.81785e-12	Downregulated	Downregulated	Downregulated	COL19A1	MIMI_L668: Collagen-like protein 6 (Acanthamoeba polyphaga mimivirus)	GO:0005164, GO:0005515, GO:0006955, GO:0016020	GO:0001501,GO:0003674,GO:0005198,GO:0005201,GO:0005488,GO:0005515,GO:0005575,GO:0005576,GO:0005578,GO:0005581,GO:0005622,GO:0005623,GO:0005737,GO:0005783,GO:0005788,GO:0007155,GO:0007275,GO:0007517,GO:0007519,GO:0008150,GO:0009888,GO:0009987,GO:0014706,GO:0016043,GO:0016337,GO:0022610,GO:0030198,GO:0030674,GO:0031012,GO:0031974,GO:0032501,GO:0032502,GO:0043062,GO:0043226,GO:0043227,GO:0043229,GO:…	NA	NA	W	Extracellular structures	PF00229, PF01391
pdam_00001264	-1.58442	-0.671411	-2.37607	0.000266625	0.191585	4.15117e-10	Downregulated	NA	Downregulated	TNFSF13	COL6A3: Collagen alpha-3(VI) chain (Gallus gallus)	GO:0005164, GO:0005515, GO:0006955, GO:0016020	GO:0000018,GO:0001667,GO:0001776,GO:0001936,GO:0001938,GO:0002250,GO:0002251,GO:0002252,GO:0002260,GO:0002376,GO:0002377,GO:0002381,GO:0002385,GO:0002426,GO:0002440,GO:0002443,GO:0002449,GO:0002460,GO:0002634,GO:0002636,GO:0002637,GO:0002682,GO:0002684,GO:0002694,GO:0002696,GO:0002697,GO:0002699,GO:0002700,GO:0002703,GO:0002706,GO:0002712,GO:0002819,GO:0002821,GO:0002822,GO:0002824,GO:0002889,GO:…	NA	K05475	T	Signal transduction mechanisms	PF00229, PF01391
pdam_00001265	-0.716496	-0.321546	-0.740316	0.0844629	0.502074	0.0195654	NA	NA	Downregulated	NA	unknown function	NA	NA	NA	NA	NA	NA	NA
pdam_00001266	-0.305361	-0.487131	-0.38699	0.259157	0.0345724	0.0458416	NA	Downregulated	Downregulated	ARSB	Arsb: Arylsulfatase B (Mus musculus)	GO:0003824, GO:0008152, GO:0008484	GO:0000323,GO:0003674,GO:0003824,GO:0003943,GO:0004065,GO:0005575,GO:0005576,GO:0005622,GO:0005623,GO:0005737,GO:0005739,GO:0005764,GO:0005773,GO:0005775,GO:0005783,GO:0005788,GO:0005791,GO:0005794,GO:0005975,GO:0006022,GO:0006026,GO:0006027,GO:0006029,GO:0006082,GO:0006464,GO:0006629,GO:0006643,GO:0006644,GO:0006664,GO:0006665,GO:0006687,GO:0006790,GO:0006793,GO:0006796,GO:0006807,GO:0006810,GO:…	K01130	K01130,K01135,K12375	NA	NA	PF00884
pdam_00001269	-0.0921049	-0.00666634	0.276428	0.784299	0.989043	0.163966	NA	NA	NA	NA	unknown function	GO:0046872	NA	NA	K12481	NA	NA	PF01363
pdam_00001270	-0.112282	-0.083699	-0.229584	0.766902	0.839669	0.328543	NA	NA	NA	NA	MFGE8: Lactadherin (Homo sapiens)	NA	NA	NA	NA	T	Signal transduction mechanisms	PF00008, PF00024, PF00754
pdam_00001271	0.119088	0.0268939	0.312037	0.552665	0.919457	0.0141756	NA	NA	Upregulated	AIFM2	AIFM2: Apoptosis-inducing factor 2 (Taeniopygia guttata)	GO:0016491, GO:0055114	GO:0000302,GO:0000304,GO:0003674,GO:0003824,GO:0005575,GO:0005622,GO:0005623,GO:0005634,GO:0005737,GO:0005739,GO:0005740,GO:0005741,GO:0005886,GO:0006950,GO:0006979,GO:0008150,GO:0008152,GO:0010035,GO:0010941,GO:0010942,GO:0016020,GO:0016491,GO:0016651,GO:0016667,GO:0016668,GO:0019867,GO:0031090,GO:0031966,GO:0031967,GO:0031968,GO:0031975,GO:0042221,GO:0042981,GO:0043065,GO:0043067,GO:0043068,GO:…	K22745	NA	NA	NA	PF07992
pdam_00001272	0.229109	0.0664353	0.117197	0.0563763	0.66463	0.237211	NA	NA	NA	C11ORF30	emsy: BRCA2-interacting transcriptional repressor EMSY (Danio rerio)	GO:0005515, GO:0006355	GO:0000118,GO:0000228,GO:0000785,GO:0000790,GO:0005575,GO:0005622,GO:0005623,GO:0005634,GO:0005654,GO:0005694,GO:0005856,GO:0005875,GO:0015630,GO:0031974,GO:0031981,GO:0032991,GO:0043226,GO:0043227,GO:0043228,GO:0043229,GO:0043231,GO:0043232,GO:0043233,GO:0043234,GO:0044422,GO:0044424,GO:0044427,GO:0044428,GO:0044430,GO:0044446,GO:0044451,GO:0044454,GO:0044464,GO:0070013,GO:0070822	NA	NA	NA	NA	PF00439, PF037359
pdam_00001273	-0.277446	-0.115994	0.11907	0.433472	0.787061	0.656611	NA	NA	NA	NA	Uncharacterized protein C17orf105 homolog (Mus musculus)	NA	NA	NA	NA	NA	NA	PF13879
pdam_00001274	-0.42094	-0.394168	-0.498243	0.0173378	0.0181468	0.000452748	Downregulated	Downregulated	Downregulated	DNAJC21	DNAJC21: DnaJ homolog subfamily C member 21 (Bos taurus)	GO:0003676, GO:0008270	GO:0000003,GO:0000054,GO:0001671,GO:0003674,GO:0005488,GO:0005515,GO:0005575,GO:0005622,GO:0005623,GO:0005634,GO:0005730,GO:0005737,GO:0005739,GO:0005783,GO:0005829,GO:0005840,GO:0006139,GO:0006140,GO:0006364,GO:0006396,GO:0006457,GO:0006725,GO:0006807,GO:0006810,GO:0006897,GO:0006913,GO:0007275,GO:0008047,GO:0008150,GO:0008152,GO:0008361,GO:0009118,GO:0009790,GO:0009792,GO:0009894,GO:0009987,GO:…	K09506	K09506	O	Posttranslational modification, protein turnover, chaperones	PF00226, PF12171
pdam_00001275	-0.0481346	0.229808	0.308643	0.857852	0.235933	0.0328462	NA	NA	Upregulated	AP1S1	AP1S2: AP-1 complex subunit sigma-2 (Homo sapiens)	GO:0006810, GO:0006886, GO:0008565, GO:0015031, GO:0016192, GO:0030117	GO:0000003,GO:0000139,GO:0000323,GO:0000902,GO:0000904,GO:0001505,GO:0001654,GO:0001745,GO:0001751,GO:0001754,GO:0002119,GO:0002164,GO:0002376,GO:0002478,GO:0002495,GO:0002504,GO:0002682,GO:0002697,GO:0002831,GO:0003001,GO:0003008,GO:0003674,GO:0005215,GO:0005488,GO:0005515,GO:0005575,GO:0005622,GO:0005623,GO:0005634,GO:0005654,GO:0005667,GO:0005737,GO:0005764,GO:0005765,GO:0005768,GO:0005773,GO:…	K12394	K12394,K12395	U	Intracellular trafficking, secretion, and vesicular transport	PF01217
pdam_00001276	-0.00899532	-0.127793	0.40524	0.973792	0.540511	0.00200156	NA	NA	Upregulated	WDFY1	WDFY2: WD repeat and FYVE domain-containing protein 2 (Homo sapiens)	GO:0005515, GO:0046872	GO:0003674,GO:0005488,GO:0005515,GO:0005543,GO:0005545,GO:0005575,GO:0005622,GO:0005623,GO:0005634,GO:0005737,GO:0005768,GO:0005769,GO:0005829,GO:0006810,GO:0006897,GO:0008150,GO:0008270,GO:0008289,GO:0016192,GO:0032266,GO:0035091,GO:0043167,GO:0043168,GO:0043169,GO:0043226,GO:0043227,GO:0043229,GO:0043231,GO:0044424,GO:0044444,GO:0044464,GO:0046872,GO:0046914,GO:0051179,GO:0051234,GO:1901981	K23532	NA	NA	NA	PF00400, PF01363
pdam_00001280	0.12588	0.0901591	0.1415	0.545262	0.68532	0.321388	NA	NA	NA	IPO5	Ipo5: Importin-5 (Mus musculus)	GO:0005488	GO:0000003,GO:0000166,GO:0001703,GO:0001882,GO:0001883,GO:0002119,GO:0002164,GO:0003674,GO:0004857,GO:0005048,GO:0005095,GO:0005215,GO:0005488,GO:0005515,GO:0005525,GO:0005575,GO:0005622,GO:0005623,GO:0005634,GO:0005635,GO:0005643,GO:0005730,GO:0005737,GO:0005829,GO:0005856,GO:0005875,GO:0006403,GO:0006405,GO:0006406,GO:0006605,GO:0006606,GO:0006607,GO:0006610,GO:0006810,GO:0006886,GO:0006897,GO:…	K20222	NA	NA	NA	PF13513
pdam_00001282	0.048715	0.0513089	0.243145	0.865027	0.861579	0.11964	NA	NA	NA	DSCAML1	Dscaml1: Down syndrome cell adhesion molecule-like protein 1 homolog (Mus musculus)	GO:0005515, GO:0005887, GO:0007155, GO:0007399	GO:0000902,GO:0000904,GO:0001501,GO:0001709,GO:0002237,GO:0003002,GO:0003674,GO:0003823,GO:0004871,GO:0004872,GO:0004888,GO:0005488,GO:0005515,GO:0005575,GO:0005623,GO:0005886,GO:0005887,GO:0006810,GO:0006897,GO:0006909,GO:0006928,GO:0006935,GO:0007154,GO:0007155,GO:0007156,GO:0007162,GO:0007165,GO:0007275,GO:0007389,GO:0007399,GO:0007409,GO:0007411,GO:0007413,GO:0007417,GO:0007420,GO:0007422,GO:…	K06768	K06767,K06768	T	Signal transduction mechanisms	PF00041, PF07679, PF13927
pdam_00001283	0.109604	-0.020517	0.518015	0.802474	0.972272	0.0359593	NA	NA	Upregulated	ANKMY1	Ankmy1: Ankyrin repeat and MYND domain-containing protein 1 (Mus musculus)	GO:0005515	NA	NA	NA	NA	NA	PF00023, PF01753, PF02493, PF127962
pdam_00001286	-0.264003	0.336592	0.657222	0.204641	0.0629285	3.98114e-06	NA	NA	Upregulated	SSTR2	RYa-R: RYamide receptor (Drosophila melanogaster)	GO:0004930, GO:0007186, GO:0016021	GO:0000003,GO:0001653,GO:0001676,GO:0001775,GO:0002376,GO:0002520,GO:0002521,GO:0002791,GO:0003008,GO:0003012,GO:0003674,GO:0004871,GO:0004872,GO:0004888,GO:0004930,GO:0004994,GO:0005575,GO:0005622,GO:0005623,GO:0005737,GO:0005886,GO:0005887,GO:0005929,GO:0006082,GO:0006140,GO:0006629,GO:0006631,GO:0006690,GO:0006915,GO:0006928,GO:0006936,GO:0006937,GO:0006939,GO:0006950,GO:0007154,GO:0007165,GO:…	NA	K04217,K04218,K04219,K04220,K04221	T	Signal transduction mechanisms	PF00001
pdam_00001287	-0.185665	-0.028972	1.45718	NA	NA	NA	NA	NA	NA	SSTR2	SIFaR: Neuropeptide SIFamide receptor (Drosophila melanogaster)	GO:0004930, GO:0007186, GO:0016021	GO:0000003,GO:0001653,GO:0001676,GO:0001775,GO:0002376,GO:0002520,GO:0002521,GO:0002791,GO:0003008,GO:0003012,GO:0003674,GO:0004871,GO:0004872,GO:0004888,GO:0004930,GO:0004994,GO:0005575,GO:0005622,GO:0005623,GO:0005737,GO:0005886,GO:0005887,GO:0005929,GO:0006082,GO:0006140,GO:0006629,GO:0006631,GO:0006690,GO:0006915,GO:0006928,GO:0006936,GO:0006937,GO:0006939,GO:0006950,GO:0007154,GO:0007165,GO:…	NA	K04217,K04218,K04219,K04220,K04221	T	Signal transduction mechanisms	PF00001
pdam_00001288	-0.157707	-0.482086	0.356701	0.825076	0.400258	0.404441	NA	NA	NA	NA	Parg: Poly(ADP-ribose) glycohydrolase (Drosophila melanogaster)	GO:0004649, GO:0005975	GO:0000003,GO:0003674,GO:0003824,GO:0004553,GO:0004649,GO:0005975,GO:0006950,GO:0006952,GO:0006970,GO:0006979,GO:0007049,GO:0007059,GO:0007126,GO:0008150,GO:0008152,GO:0009414,GO:0009415,GO:0009607,GO:0009620,GO:0009628,GO:0009987,GO:0010035,GO:0010118,GO:0016787,GO:0016798,GO:0022402,GO:0042221,GO:0044238,GO:0044699,GO:0044763,GO:0045132,GO:0048610,GO:0050832,GO:0050896,GO:0051321,GO:0051704,GO:…	K07759	K07759	T	Signal transduction mechanisms	PF05028
pdam_00001289	0.043813	0.2048	0.447383	0.843798	0.182996	0.000103008	NA	NA	Upregulated	FG09391.1	DDB_G0274781: Recoverin family protein DDB_G0274781 (Dictyostelium discoideum)	GO:0005509, GO:0008270	NA	NA	NA	T	Signal transduction mechanisms	PF00569, PF13499, PF13833
pdam_00001290	0.121826	-0.0683146	0.122475	0.559437	0.774195	0.395066	NA	NA	NA	NA	unknown function	GO:0005680, GO:0007049, GO:0016567	NA	NA	NA	NA	NA	PF17256
pdam_00001291	0.266044	0.077465	0.256952	0.206134	0.775115	0.0964029	NA	NA	NA	MCF2L	Mcf2l: Guanine nucleotide exchange factor DBS (Rattus norvegicus)	GO:0005085, GO:0005089, GO:0005515, GO:0035023, GO:0035556	GO:0003674,GO:0005083,GO:0005085,GO:0005088,GO:0005089,GO:0005488,GO:0005543,GO:0005545,GO:0005575,GO:0005622,GO:0005623,GO:0005634,GO:0005654,GO:0005737,GO:0005829,GO:0005886,GO:0005938,GO:0006140,GO:0006355,GO:0006357,GO:0006915,GO:0007154,GO:0007165,GO:0007166,GO:0007167,GO:0007169,GO:0007264,GO:0007265,GO:0007266,GO:0008104,GO:0008105,GO:0008150,GO:0008219,GO:0008289,GO:0009118,GO:0009889,GO:…	K20685	NA	T	Signal transduction mechanisms	PF00018, PF00621, PF13716
pdam_00001292	0.011841	0.127943	0.310831	0.951515	0.340137	0.000811165	NA	NA	Upregulated	POLR2A	RpII215: DNA-directed RNA polymerase II subunit RPB1 (Drosophila melanogaster)	GO:0003677, GO:0003899, GO:0005665, GO:0006351, GO:0006366	GO:0000003,GO:0000075,GO:0000077,GO:0000226,GO:0000278,GO:0000280,GO:0000375,GO:0000377,GO:0000398,GO:0000428,GO:0001055,GO:0003674,GO:0003676,GO:0003677,GO:0003824,GO:0003899,GO:0005488,GO:0005515,GO:0005575,GO:0005622,GO:0005623,GO:0005634,GO:0005654,GO:0005665,GO:0005694,GO:0005700,GO:0005703,GO:0005737,GO:0005739,GO:0005829,GO:0006139,GO:0006259,GO:0006281,GO:0006283,GO:0006289,GO:0006351,GO:…	K03006	K01115,K03006,K03018	K	Transcription	PF00623, PF04983, PF04990, PF04992, PF04997, PF04998, PF05000
pdam_00001293	0.211431	0.2883	0.649608	0.272525	0.0919976	6.65578e-07	NA	NA	Upregulated	UQCRH	UQCRH: Cytochrome b-c1 complex subunit 6%2C mitochondrial (Homo sapiens)	GO:0006122, GO:0008121	GO:0003674,GO:0003824,GO:0005215,GO:0005488,GO:0005515,GO:0005575,GO:0005622,GO:0005623,GO:0005737,GO:0005739,GO:0005740,GO:0005743,GO:0005746,GO:0005750,GO:0006091,GO:0006119,GO:0006122,GO:0006461,GO:0006793,GO:0006796,GO:0006810,GO:0006811,GO:0006812,GO:0006818,GO:0006996,GO:0007010,GO:0008121,GO:0008150,GO:0008152,GO:0008324,GO:0009060,GO:0009653,GO:0009987,GO:0010927,GO:0015075,GO:0015077,GO:…	K00416	K00416	C	Energy production and conversion	PF02320
pdam_00001295	-0.163908	-0.173026	-0.00885889	0.412038	0.365557	0.957561	NA	NA	NA	CCDC39	ccdc39: Coiled-coil domain-containing protein 39 (Xenopus tropicalis)	GO:0003341, GO:0005930, GO:0036159	GO:0001539,GO:0003341,GO:0003351,GO:0005575,GO:0005622,GO:0005623,GO:0005737,GO:0005929,GO:0005930,GO:0006461,GO:0006928,GO:0007017,GO:0007018,GO:0007275,GO:0007368,GO:0007389,GO:0008150,GO:0009799,GO:0009855,GO:0009987,GO:0016043,GO:0022607,GO:0031514,GO:0032501,GO:0032502,GO:0032838,GO:0034622,GO:0035085,GO:0040011,GO:0042995,GO:0043226,GO:0043227,GO:0043229,GO:0043231,GO:0043623,GO:0043933,GO:…	NA	NA	NA	NA	NA
pdam_00001296	0.0890113	0.310277	0.370204	0.776602	0.183794	0.0407411	NA	NA	Upregulated	NA	unknown function	NA	NA	NA	NA	NA	NA	NA
pdam_00001300	0.142914	-0.530666	-1.2248	0.64006	0.0151582	1.07503e-10	NA	Downregulated	Downregulated	RB1	RB1: Retinoblastoma-associated protein (Homo sapiens)	GO:0005634, GO:0006357, GO:0051726	GO:0000003,GO:0000070,GO:0000080,GO:0000082,GO:0000083,GO:0000084,GO:0000122,GO:0000226,GO:0000278,GO:0000280,GO:0000785,GO:0000819,GO:0000902,GO:0000904,GO:0000975,GO:0000988,GO:0000989,GO:0001047,GO:0001067,GO:0001071,GO:0001558,GO:0001708,GO:0001932,GO:0001933,GO:0002262,GO:0002376,GO:0002520,GO:0002682,GO:0002761,GO:0002763,GO:0003008,GO:0003674,GO:0003676,GO:0003677,GO:0003700,GO:0003712,GO:…	K06618	K04681,K06618	D	Cell cycle control, cell division, chromosome partitioning	PF01857, PF01858, PF08934, PF11934
pdam_00001302	0.0684707	0.847755	3.16921	NA	NA	NA	NA	NA	NA	ADAMTSL3	ADAMTS6: A disintegrin and metalloproteinase with thrombospondin motifs 6 (Homo sapiens)	GO:0004222, GO:0006508, GO:0008237, GO:0008270	GO:0003674,GO:0003824,GO:0004175,GO:0004222,GO:0005575,GO:0005576,GO:0005578,GO:0006508,GO:0008150,GO:0008152,GO:0008233,GO:0008237,GO:0016787,GO:0019538,GO:0031012,GO:0043170,GO:0044238,GO:0044421,GO:0070011,GO:0071704	NA	NA	O	Posttranslational modification, protein turnover, chaperones	PF01421, PF05986
pdam_00001304	0.164448	0.187863	0.59851	0.101074	0.0398447	6.60699e-17	NA	Upregulated	Upregulated	CAB39	CAB39: Calcium-binding protein 39 (Homo sapiens)	GO:0005488	GO:0000003,GO:0000075,GO:0000078,GO:0000131,GO:0000910,GO:0000920,GO:0000922,GO:0001700,GO:0001932,GO:0001934,GO:0003674,GO:0005488,GO:0005509,GO:0005575,GO:0005622,GO:0005623,GO:0005634,GO:0005737,GO:0005815,GO:0005816,GO:0005819,GO:0005826,GO:0005829,GO:0005856,GO:0005886,GO:0005933,GO:0005937,GO:0005938,GO:0006355,GO:0006461,GO:0006996,GO:0007010,GO:0007015,GO:0007049,GO:0007050,GO:0007093,GO:…	K08272	K08272	NA	NA	PF08569
pdam_00001305	0.129941	-0.0298686	0.0404853	0.525123	0.91114	0.794535	NA	NA	NA	EBPL	Ebpl: Emopamil-binding protein-like (Mus musculus)	GO:0016021, GO:0016125, GO:0047750	GO:0000247,GO:0003674,GO:0003824,GO:0005575,GO:0005622,GO:0005623,GO:0005737,GO:0005783,GO:0005789,GO:0005886,GO:0006066,GO:0006629,GO:0006694,GO:0008150,GO:0008152,GO:0008202,GO:0008610,GO:0009058,GO:0012505,GO:0016020,GO:0016125,GO:0016126,GO:0016853,GO:0016860,GO:0016863,GO:0031090,GO:0042175,GO:0043226,GO:0043227,GO:0043229,GO:0043231,GO:0044238,GO:0044281,GO:0044283,GO:0044422,GO:0044424,GO:…	NA	K01824,K03542,K03844	I	Lipid transport and metabolism	PF05241
pdam_00001306	0.181652	0.0121442	-0.325127	0.406883	0.972272	0.035676	NA	NA	Downregulated	C5ORF34	C5orf34: Uncharacterized protein C5orf34 (Homo sapiens)	NA	NA	NA	NA	NA	NA	PF15016, PF15025
pdam_00001307	0.201639	0.169995	0.53043	0.188132	0.258774	6.11276e-07	NA	NA	Upregulated	RAB6B	Rab6: Ras-related protein Rab6 (Drosophila melanogaster)	GO:0003924, GO:0005525	GO:0000003,GO:0000042,GO:0000139,GO:0000166,GO:0000226,GO:0000301,GO:0000578,GO:0000902,GO:0000904,GO:0001411,GO:0001654,GO:0001671,GO:0001745,GO:0001751,GO:0001754,GO:0001775,GO:0001882,GO:0001883,GO:0003002,GO:0003006,GO:0003008,GO:0003674,GO:0003824,GO:0003924,GO:0005488,GO:0005515,GO:0005525,GO:0005575,GO:0005622,GO:0005623,GO:0005634,GO:0005737,GO:0005768,GO:0005794,GO:0005795,GO:0005802,GO:…	K07893	K07893,K07894,K07895,K07896,K07976	U	Intracellular trafficking, secretion, and vesicular transport	PF00071
pdam_00001309	-0.202623	-0.392657	-0.316389	0.396863	0.0459366	0.0535092	NA	Downregulated	NA	PLSCR3	PLSCR2: Phospholipid scramblase 2 (Bos taurus)	NA	GO:0000902,GO:0000981,GO:0000982,GO:0001071,GO:0001077,GO:0001228,GO:0001775,GO:0002237,GO:0002252,GO:0002376,GO:0002520,GO:0002526,GO:0002682,GO:0002684,GO:0002694,GO:0003008,GO:0003674,GO:0003700,GO:0005102,GO:0005154,GO:0005215,GO:0005319,GO:0005488,GO:0005509,GO:0005515,GO:0005548,GO:0005575,GO:0005622,GO:0005623,GO:0005634,GO:0005730,GO:0005737,GO:0005739,GO:0005740,GO:0005794,GO:0005829,GO:…	NA	NA	M	Cell wall/membrane/envelope biogenesis	PF03803
pdam_00001310	-0.400628	-0.491604	-0.742727	0.464548	0.336404	0.0418689	NA	NA	Downregulated	NA	IFI44: Interferon-induced protein 44 (Homo sapiens)	GO:0005525	NA	NA	NA	NA	NA	PF00735
pdam_00001311	0.1277	0.0311708	-0.0899379	0.61706	0.924583	0.615714	NA	NA	NA	NA	GAL3ST1: Galactosylceramide sulfotransferase (Bos taurus)	GO:0001733, GO:0005794, GO:0009247, GO:0016021	NA	NA	K01019,K09676	NA	NA	PF06990
pdam_00001312	-0.164962	-0.536977	-1.07199	0.272187	4.31429e-07	4.30091e-25	NA	Downregulated	Downregulated	ASL	Asl: Argininosuccinate lyase (Rattus norvegicus)	GO:0003824, GO:0004056, GO:0042450	GO:0000050,GO:0000053,GO:0001101,GO:0001655,GO:0001666,GO:0001822,GO:0001889,GO:0002237,GO:0002376,GO:0003674,GO:0003824,GO:0004056,GO:0004333,GO:0005198,GO:0005212,GO:0005575,GO:0005622,GO:0005623,GO:0005634,GO:0005737,GO:0005739,GO:0005740,GO:0005741,GO:0005783,GO:0005829,GO:0006082,GO:0006464,GO:0006473,GO:0006475,GO:0006520,GO:0006525,GO:0006526,GO:0006527,GO:0006536,GO:0006541,GO:0006575,GO:…	K01755	K01755	E	Amino acid transport and metabolism	PF00206, PF14698
pdam_00001315	-0.136403	-0.34315	-1.02367	0.707285	0.230346	1.36405e-06	NA	NA	Downregulated	ENOX1	Enox1: Ecto-NOX disulfide-thiol exchanger 1 (Mus musculus)	GO:0003676	GO:0003674,GO:0003676,GO:0003723,GO:0003729,GO:0003824,GO:0005488,GO:0005575,GO:0005576,GO:0005615,GO:0005623,GO:0005886,GO:0007624,GO:0008150,GO:0008152,GO:0009897,GO:0009986,GO:0015035,GO:0015036,GO:0016020,GO:0016491,GO:0016667,GO:0044421,GO:0044425,GO:0044459,GO:0044464,GO:0044699,GO:0044710,GO:0048511,GO:0055114,GO:0071944,GO:0097159,GO:1901363	NA	NA	NA	NA	PF00076
pdam_00001316	0.488836	0.200516	0.81074	0.113881	0.58773	0.000299386	NA	NA	Upregulated	MPI	MPI: Mannose-6-phosphate isomerase (Bos taurus)	GO:0004476, GO:0005975, GO:0008270, GO:0009298	GO:0000003,GO:0000032,GO:0000902,GO:0000904,GO:0001501,GO:0001889,GO:0002062,GO:0002063,GO:0002119,GO:0002164,GO:0003006,GO:0003674,GO:0003824,GO:0004476,GO:0005575,GO:0005622,GO:0005623,GO:0005634,GO:0005737,GO:0005829,GO:0005975,GO:0005996,GO:0006013,GO:0006056,GO:0006057,GO:0006082,GO:0006139,GO:0006464,GO:0006486,GO:0006487,GO:0006488,GO:0006725,GO:0006753,GO:0006766,GO:0006767,GO:0006793,GO:…	K01809	K01809	G	Carbohydrate transport and metabolism	PF01238
pdam_00001317	-0.638975	-0.0732257	0.419039	0.0378841	0.881216	0.0940166	Downregulated	NA	NA	SERP1	Serp2: Stress-associated endoplasmic reticulum protein 2 (Mus musculus)	GO:0005783	GO:0001501,GO:0001932,GO:0001934,GO:0002791,GO:0002793,GO:0005575,GO:0005622,GO:0005623,GO:0005737,GO:0005783,GO:0005789,GO:0005840,GO:0005886,GO:0005975,GO:0005996,GO:0006006,GO:0006417,GO:0006464,GO:0006486,GO:0006950,GO:0006979,GO:0006984,GO:0006986,GO:0006987,GO:0007009,GO:0007154,GO:0007165,GO:0007275,GO:0007517,GO:0007568,GO:0008150,GO:0008152,GO:0009058,GO:0009059,GO:0009100,GO:0009101,GO:…	NA	NA	U	Intracellular trafficking, secretion, and vesicular transport	PF06624
pdam_00001318	0.218027	0.120357	0.200561	0.0697859	0.359971	0.0316909	NA	NA	Upregulated	NA	unknown function	GO:0003700, GO:0006355	NA	NA	NA	NA	NA	PF01166
pdam_00001319	0.140961	0.0436262	0.211775	0.305519	0.804324	0.0278477	NA	NA	Upregulated	TMCO3	TMCO3: Transmembrane and coiled-coil domain-containing protein 3 (Homo sapiens)	GO:0006812, GO:0015299, GO:0016021, GO:0055085	GO:0005575,GO:0016020	NA	NA	P	Inorganic ion transport and metabolism	PF00999
pdam_00001320	0.279811	-0.0212648	-0.825282	0.473091	0.972272	0.00145353	NA	NA	Downregulated	CENPI	CENPI: Centromere protein I (Gallus gallus)	GO:0000776, GO:0034508	GO:0000003,GO:0000070,GO:0000226,GO:0000236,GO:0000278,GO:0000280,GO:0000775,GO:0000776,GO:0000777,GO:0000779,GO:0000793,GO:0000819,GO:0000922,GO:0000939,GO:0001541,GO:0003006,GO:0005575,GO:0005622,GO:0005623,GO:0005634,GO:0005654,GO:0005694,GO:0005737,GO:0005815,GO:0005816,GO:0005819,GO:0005829,GO:0005856,GO:0006139,GO:0006259,GO:0006323,GO:0006325,GO:0006333,GO:0006334,GO:0006336,GO:0006338,GO:…	K11501	K11501	NA	NA	PF07778
pdam_00001322	-0.10523	0.259131	0.537605	0.620702	0.117711	1.98341e-05	NA	NA	Upregulated	LSM1	LSM1: U6 snRNA-associated Sm-like protein LSm1 (Bos taurus)	GO:0000956	GO:0000288,GO:0000290,GO:0000291,GO:0000339,GO:0000375,GO:0000377,GO:0000398,GO:0000932,GO:0000956,GO:0002119,GO:0002164,GO:0003674,GO:0003676,GO:0003723,GO:0005488,GO:0005575,GO:0005622,GO:0005623,GO:0005634,GO:0005681,GO:0005737,GO:0005829,GO:0005845,GO:0006139,GO:0006396,GO:0006397,GO:0006401,GO:0006402,GO:0006725,GO:0006807,GO:0006996,GO:0007275,GO:0008150,GO:0008152,GO:0008334,GO:0008380,GO:…	K12620	K03952,K12620	A	RNA processing and modification	PF01423
pdam_00001323	-0.0882921	0.574931	0.320504	0.772935	0.00294739	0.0739756	NA	Upregulated	NA	DGAT2	mogat2-a: 2-acylglycerol O-acyltransferase 2-A (Xenopus laevis)	GO:0016747	GO:0000003,GO:0003008,GO:0003674,GO:0003824,GO:0003846,GO:0004144,GO:0005488,GO:0005515,GO:0005575,GO:0005622,GO:0005623,GO:0005737,GO:0005783,GO:0005789,GO:0005811,GO:0006629,GO:0006637,GO:0006638,GO:0006639,GO:0006641,GO:0006643,GO:0006644,GO:0006650,GO:0006651,GO:0006665,GO:0006672,GO:0006732,GO:0006793,GO:0006796,GO:0006807,GO:0007275,GO:0007276,GO:0007292,GO:0007498,GO:0007586,GO:0008150,GO:…	K11172	K11156,K11160,K11171,K11172,K14456,K14457,K14458	I	Lipid transport and metabolism	PF03982
pdam_00001325	0.16053	-0.223474	-0.394776	0.857106	0.799247	0.453544	NA	NA	NA	NA	wif1: Wnt inhibitory factor 1 (Xenopus laevis)	NA	NA	NA	NA	M	Cell wall/membrane/envelope biogenesis	NA
pdam_00001328	-0.392067	0.118806	0.180092	0.553102	0.887327	0.709838	NA	NA	NA	NA	unknown function	NA	NA	NA	NA	NA	NA	NA
pdam_00001329	-0.374294	-0.536579	-0.981223	0.121666	0.00759223	4.92619e-08	NA	Downregulated	Downregulated	NA	dga1: Diacylglycerol O-acyltransferase 1 (Schizosaccharomyces pombe (strain 972 / ATCC 24843))	GO:0016747	NA	NA	K14457,K14458	NA	NA	PF03982
pdam_00001330	0.583909	-0.184335	1.41483	0.0900869	0.672189	1.62612e-08	NA	NA	Upregulated	TBXAS1	cyp3a30: Cytochrome P450 3A30 (Fundulus heteroclitus)	GO:0005506, GO:0016705, GO:0020037, GO:0055114	GO:0001763,GO:0003674,GO:0003824,GO:0004497,GO:0004796,GO:0005575,GO:0005622,GO:0005623,GO:0005737,GO:0005783,GO:0005789,GO:0006082,GO:0006629,GO:0006690,GO:0006720,GO:0006721,GO:0006725,GO:0006805,GO:0006807,GO:0006810,GO:0006873,GO:0007275,GO:0008150,GO:0008152,GO:0008299,GO:0008610,GO:0009056,GO:0009058,GO:0009410,GO:0009653,GO:0009889,GO:0009891,GO:0009893,GO:0009914,GO:0009926,GO:0009934,GO:…	NA	K01832,K07424,K07824	Q	Secondary metabolites biosynthesis, transport and catabolism	PF00067
pdam_00001331	-0.175488	-0.289282	-0.476918	0.429811	0.124109	0.00123974	NA	NA	Downregulated	NA	unknown function	NA	NA	NA	NA	NA	NA	NA
pdam_00001333	0.0612792	-0.0854188	-0.163442	0.771345	0.669269	0.207598	NA	NA	NA	ACER3	ACER3: Alkaline ceramidase 3 (Homo sapiens)	GO:0006672, GO:0016021, GO:0016811	GO:0000139,GO:0000322,GO:0000323,GO:0000324,GO:0000329,GO:0003674,GO:0003824,GO:0004553,GO:0005575,GO:0005622,GO:0005623,GO:0005737,GO:0005773,GO:0005774,GO:0005783,GO:0005789,GO:0005794,GO:0006066,GO:0006629,GO:0006643,GO:0006644,GO:0006665,GO:0006670,GO:0006671,GO:0006672,GO:0006793,GO:0006796,GO:0006807,GO:0008150,GO:0008152,GO:0008284,GO:0008610,GO:0009056,GO:0009058,GO:0009987,GO:0012505,GO:…	K04711	K04711,K05848	I	Lipid transport and metabolism	PF05875
pdam_00001335	0.0658399	0.130095	0.624987	0.823917	0.621948	8.14807e-05	NA	NA	Upregulated	PSMC6	Psmc6: 26S protease regulatory subunit 10B (Mus musculus)	GO:0005524, GO:0005737, GO:0016787, GO:0030163	GO:0000003,GO:0000075,GO:0000077,GO:0000082,GO:0000084,GO:0000166,GO:0000209,GO:0000278,GO:0000502,GO:0000975,GO:0001013,GO:0001067,GO:0001163,GO:0001882,GO:0001883,GO:0002119,GO:0002164,GO:0002376,GO:0002474,GO:0002478,GO:0002479,GO:0003674,GO:0003676,GO:0003677,GO:0003824,GO:0004175,GO:0005488,GO:0005515,GO:0005524,GO:0005575,GO:0005622,GO:0005623,GO:0005634,GO:0005654,GO:0005737,GO:0005829,GO:…	K03064	K03064	O	Posttranslational modification, protein turnover, chaperones	PF00004
pdam_00001336	0.166809	-0.00685608	0.0235495	0.22215	0.976656	0.837034	NA	NA	NA	DLG1	dlg2: Disks large homolog 2 (Danio rerio)	GO:0005515	GO:0000003,GO:0000226,GO:0000902,GO:0000904,GO:0001501,GO:0001654,GO:0001655,GO:0001657,GO:0001658,GO:0001700,GO:0001709,GO:0001738,GO:0001763,GO:0001771,GO:0001772,GO:0001775,GO:0001816,GO:0001932,GO:0001934,GO:0001935,GO:0002009,GO:0002088,GO:0002119,GO:0002164,GO:0002165,GO:0002168,GO:0002250,GO:0002252,GO:0002367,GO:0002369,GO:0002376,GO:0002440,GO:0002443,GO:0002449,GO:0002456,GO:0002460,GO:…	K12076	K11828,K12076	T	Signal transduction mechanisms	PF00018, PF00595, PF00625, PF090588
pdam_00001337	0.142895	0.213117	0.201549	0.353245	0.110922	0.0617818	NA	NA	NA	MED4	med4: Mediator of RNA polymerase II transcription subunit 4 (Xenopus laevis)	GO:0001104, GO:0006357, GO:0016592	GO:0000003,GO:0000075,GO:0000077,GO:0000902,GO:0000904,GO:0000988,GO:0000989,GO:0001076,GO:0001104,GO:0002009,GO:0003674,GO:0003712,GO:0003713,GO:0004872,GO:0005102,GO:0005488,GO:0005515,GO:0005575,GO:0005622,GO:0005623,GO:0005634,GO:0005654,GO:0006139,GO:0006351,GO:0006352,GO:0006355,GO:0006357,GO:0006366,GO:0006367,GO:0006725,GO:0006807,GO:0006950,GO:0006974,GO:0007049,GO:0007093,GO:0007095,GO:…	K15146	K15146	K	Transcription	PF10018
pdam_00001338	0.0416601	0.12934	-0.170588	0.916795	NA	0.461367	NA	NA	NA	TAF9B	TAF9B: Transcription initiation factor TFIID subunit 9B (Pongo abelii)	GO:0006352, GO:0046982	GO:0000122,GO:0000123,GO:0000124,GO:0000125,GO:0000228,GO:0000428,GO:0000785,GO:0000790,GO:0000975,GO:0000988,GO:0000989,GO:0000990,GO:0000991,GO:0001067,GO:0001558,GO:0003674,GO:0003676,GO:0003677,GO:0003682,GO:0003712,GO:0003713,GO:0003714,GO:0003824,GO:0004017,GO:0005198,GO:0005488,GO:0005515,GO:0005575,GO:0005622,GO:0005623,GO:0005634,GO:0005654,GO:0005667,GO:0005669,GO:0005694,GO:0005737,GO:…	K03133	K03133,K14535	K	Transcription	PF02291
pdam_00001341	0.0863082	0.295345	0.101319	0.805025	0.259814	0.650024	NA	NA	NA	NA	unknown function	NA	NA	NA	NA	NA	NA	NA
pdam_00001342	-0.349604	0.0158607	-0.201963	0.0105582	0.949123	0.0813451	Downregulated	NA	NA	RPL35A	rpl35a: 60S ribosomal protein L35a (Ictalurus punctatus)	GO:0003735, GO:0005622, GO:0005840, GO:0006412	GO:0000003,GO:0000049,GO:0000184,GO:0000956,GO:0002119,GO:0002164,GO:0002181,GO:0003674,GO:0003676,GO:0003723,GO:0003735,GO:0005198,GO:0005488,GO:0005575,GO:0005622,GO:0005623,GO:0005634,GO:0005730,GO:0005737,GO:0005829,GO:0005840,GO:0006139,GO:0006364,GO:0006396,GO:0006401,GO:0006402,GO:0006412,GO:0006413,GO:0006414,GO:0006415,GO:0006605,GO:0006612,GO:0006613,GO:0006614,GO:0006725,GO:0006807,GO:…	K02917	K01952,K02917,K09377	J	Translation, ribosomal structure and biogenesis	PF01247
pdam_00001345	0.143652	-0.405049	-0.831119	0.662864	NA	8.07279e-05	NA	NA	Downregulated	NA	unknown function	NA	NA	NA	NA	NA	NA	NA
pdam_00001346	0.239586	-0.0409918	0.158267	0.451859	0.92621	0.497382	NA	NA	NA	NA	unknown function	NA	NA	NA	NA	NA	NA	NA
pdam_00001348	0.141122	-0.0329191	0.0160165	0.494025	0.90569	0.922865	NA	NA	NA	DTYMK	ZEU1: Thymidylate kinase (Arabidopsis thaliana)	GO:0004798, GO:0005524, GO:0006233	GO:0002119,GO:0002164,GO:0003674,GO:0003824,GO:0004798,GO:0005575,GO:0005622,GO:0005623,GO:0005634,GO:0005654,GO:0005737,GO:0005739,GO:0005740,GO:0005758,GO:0005759,GO:0005829,GO:0006139,GO:0006220,GO:0006221,GO:0006227,GO:0006233,GO:0006235,GO:0006259,GO:0006260,GO:0006261,GO:0006281,GO:0006725,GO:0006753,GO:0006793,GO:0006796,GO:0006807,GO:0006950,GO:0006974,GO:0007049,GO:0007275,GO:0008150,GO:…	K00943	K00943	F	Nucleotide transport and metabolism	PF02223
pdam_00001349	-0.0621192	-0.167761	-0.652631	0.873906	0.606063	0.00195277	NA	NA	Downregulated	ZIC4	Zic4: Zinc finger protein ZIC 4 (Mus musculus)	GO:0003676	GO:0000003,GO:0001071,GO:0001708,GO:0002119,GO:0002164,GO:0002165,GO:0003002,GO:0003006,GO:0003674,GO:0003676,GO:0003677,GO:0003700,GO:0005488,GO:0005575,GO:0005622,GO:0005623,GO:0005634,GO:0005737,GO:0006139,GO:0006351,GO:0006352,GO:0006355,GO:0006357,GO:0006725,GO:0006807,GO:0006928,GO:0007154,GO:0007165,GO:0007166,GO:0007167,GO:0007178,GO:0007275,GO:0007276,GO:0007350,GO:0007365,GO:0007389,GO:…	K06235	K09225,K09227	K	Transcription	PF00096
pdam_00001350	-0.120894	-0.00545805	0.0197441	0.588315	0.987854	0.906948	NA	NA	NA	ATG4B	ATG4B: Cysteine protease ATG4B (Gallus gallus)	GO:0004197, GO:0006508, GO:0006914	GO:0000045,GO:0000422,GO:0003674,GO:0003824,GO:0004175,GO:0004180,GO:0004197,GO:0005488,GO:0005515,GO:0005575,GO:0005622,GO:0005623,GO:0005634,GO:0005737,GO:0005773,GO:0005775,GO:0005776,GO:0005829,GO:0006464,GO:0006497,GO:0006501,GO:0006508,GO:0006605,GO:0006612,GO:0006623,GO:0006810,GO:0006886,GO:0006914,GO:0006950,GO:0006995,GO:0006996,GO:0007033,GO:0007034,GO:0007154,GO:0008104,GO:0008150,GO:…	K08342	K08342	O	Posttranslational modification, protein turnover, chaperones	PF03416
pdam_00001352	0.191389	-0.185019	-0.0859769	0.485454	0.504291	0.677083	NA	NA	NA	ZDHHC23	Zdhhc23: Palmitoyltransferase ZDHHC23 (Mus musculus)	NA	GO:0003674,GO:0003824,GO:0005575,GO:0005622,GO:0005623,GO:0005737,GO:0005794,GO:0006464,GO:0006497,GO:0006810,GO:0006888,GO:0007009,GO:0008104,GO:0008150,GO:0008152,GO:0009058,GO:0009059,GO:0009987,GO:0016020,GO:0016043,GO:0016044,GO:0016192,GO:0016409,GO:0016417,GO:0016482,GO:0016740,GO:0016746,GO:0016747,GO:0018345,GO:0019538,GO:0019706,GO:0019707,GO:0033036,GO:0034613,GO:0034645,GO:0036211,GO:…	K18932	K18932	NA	NA	PF01529
pdam_00001353	0.118723	0.222888	0.31195	0.372273	0.0427726	0.000444577	NA	Upregulated	Upregulated	GSK3B	GSK3B: Glycogen synthase kinase-3 beta (Homo sapiens)	GO:0004672, GO:0005524, GO:0006468	GO:0000003,GO:0000166,GO:0000226,GO:0000278,GO:0000320,GO:0000768,GO:0000902,GO:0000904,GO:0001558,GO:0001837,GO:0001882,GO:0001883,GO:0001932,GO:0001933,GO:0001934,GO:0001947,GO:0001952,GO:0001954,GO:0002009,GO:0002039,GO:0002064,GO:0002119,GO:0002164,GO:0002165,GO:0002168,GO:0002682,GO:0003002,GO:0003006,GO:0003007,GO:0003008,GO:0003013,GO:0003073,GO:0003143,GO:0003146,GO:0003205,GO:0003206,GO:…	K03083	K00924,K03083,K08282,K08286,K08822,K12766,K14502	T	Signal transduction mechanisms	PF00069
pdam_00001354	0.134161	-0.0283389	-0.223587	0.543499	0.923976	0.134912	NA	NA	NA	MRE11A	MRE11: Double-strand break repair protein MRE11 (Macaca fascicularis)	GO:0004519, GO:0005634, GO:0006302, GO:0008408, GO:0016787, GO:0030145, GO:0030870	GO:0000003,GO:0000014,GO:0000018,GO:0000019,GO:0000075,GO:0000077,GO:0000228,GO:0000706,GO:0000723,GO:0000724,GO:0000725,GO:0000726,GO:0000727,GO:0000729,GO:0000738,GO:0000785,GO:0000790,GO:0000791,GO:0000793,GO:0000794,GO:0000795,GO:0000910,GO:0001932,GO:0001934,GO:0003006,GO:0003674,GO:0003676,GO:0003677,GO:0003690,GO:0003691,GO:0003697,GO:0003824,GO:0004518,GO:0004519,GO:0004520,GO:0004527,GO:…	K10865	K10865	L	Replication, recombination and repair	PF00149, PF04152
pdam_00001355	-0.0695551	-0.15285	-0.463717	0.628287	0.184349	7.74248e-08	NA	NA	Downregulated	FSTL1	Fstl1: Follistatin-related protein 1 (Mus musculus)	GO:0005509, GO:0005515	GO:0003002,GO:0003674,GO:0005488,GO:0005539,GO:0005575,GO:0005576,GO:0005615,GO:0006355,GO:0006357,GO:0007154,GO:0007165,GO:0007166,GO:0007167,GO:0007178,GO:0007275,GO:0007389,GO:0008150,GO:0008201,GO:0009790,GO:0009889,GO:0009953,GO:0009966,GO:0009987,GO:0010468,GO:0010556,GO:0010646,GO:0019219,GO:0019222,GO:0023051,GO:0023052,GO:0030154,GO:0030509,GO:0030510,GO:0030903,GO:0031323,GO:0031326,GO:…	K23912	NA	W	Extracellular structures	PF076485
pdam_00001356	0.0403907	0.0641305	0.328414	0.684223	0.469816	6.14311e-09	NA	NA	Upregulated	CUL3	Cul3: Cullin-3 (Rattus norvegicus)	GO:0006511, GO:0031461, GO:0031625	GO:0000003,GO:0000082,GO:0000090,GO:0000151,GO:0000152,GO:0000278,GO:0000279,GO:0000902,GO:0000904,GO:0000910,GO:0000922,GO:0001654,GO:0001701,GO:0001745,GO:0001824,GO:0001825,GO:0001829,GO:0001831,GO:0002064,GO:0002165,GO:0003006,GO:0003674,GO:0003824,GO:0004842,GO:0005488,GO:0005515,GO:0005575,GO:0005622,GO:0005623,GO:0005634,GO:0005737,GO:0005794,GO:0005819,GO:0005827,GO:0005829,GO:0005856,GO:…	K03869	K03869,K10609	D	Cell cycle control, cell division, chromosome partitioning	PF00888, PF10557
pdam_00001357	0.365034	0.113878	0.0020547	0.417874	0.844172	0.995103	NA	NA	NA	DDX6	Os04g0533000: DEAD-box ATP-dependent RNA helicase 6 (Oryza sativa subsp. japonica)	GO:0003676, GO:0005524	GO:0000003,GO:0000075,GO:0000077,GO:0000226,GO:0000278,GO:0000288,GO:0000290,GO:0000291,GO:0000932,GO:0000956,GO:0002009,GO:0002119,GO:0002164,GO:0003006,GO:0003674,GO:0003676,GO:0003723,GO:0003724,GO:0003824,GO:0004004,GO:0004386,GO:0005488,GO:0005515,GO:0005575,GO:0005622,GO:0005623,GO:0005634,GO:0005737,GO:0005829,GO:0005856,GO:0005875,GO:0006139,GO:0006152,GO:0006163,GO:0006195,GO:0006200,GO:…	K12614	K12614,K15691	A	RNA processing and modification	PF00270, PF00271
pdam_00001358	-0.0788555	-0.172601	-0.105955	0.822732	0.575618	0.631289	NA	NA	NA	NA	ESRRG: Estrogen-related receptor gamma (Pongo abelii)	GO:0003677, GO:0003700, GO:0003707, GO:0004887, GO:0005634, GO:0006355, GO:0008270, GO:0043401, GO:0043565	NA	K08554	K08554	K	Transcription	PF00104, PF00105
pdam_00001360	-0.37345	-0.0930851	-0.768371	0.316832	0.849552	0.00317321	NA	NA	Downregulated	FG05481.1	At5g27410: Branched-chain-amino-acid aminotransferase-like protein 2 (Arabidopsis thaliana)	NA	NA	K22696	NA	NA	NA	NA
pdam_00001361	0.247444	0.444624	1.03269	0.709614	0.43886	0.00717558	NA	NA	Upregulated	NA	unknown function	NA	NA	NA	NA	NA	NA	NA
pdam_00001362	0.198925	0.119501	0.0215797	0.258964	0.529019	0.886297	NA	NA	NA	RPAP3	Rpap3: RNA polymerase II-associated protein 3 (Mus musculus)	GO:0005515	GO:0002165,GO:0003674,GO:0003824,GO:0004721,GO:0004722,GO:0005488,GO:0005515,GO:0006793,GO:0006796,GO:0007275,GO:0007444,GO:0007446,GO:0007552,GO:0007560,GO:0008150,GO:0008152,GO:0008283,GO:0009653,GO:0009791,GO:0009886,GO:0009887,GO:0009987,GO:0016311,GO:0016787,GO:0016788,GO:0016791,GO:0032501,GO:0032502,GO:0035265,GO:0040007,GO:0042578,GO:0044237,GO:0044699,GO:0044707,GO:0044767,GO:0046528,GO:…	K23002	K09561,K19870	NA	NA	PF13181, PF13414, PF13877
pdam_00001365	-0.131201	0.27235	0.324005	0.482442	0.0717276	0.00742744	NA	NA	Upregulated	LAMTOR5	v1g226489: Ragulator complex protein LAMTOR5 homolog (Nematostella vectensis)	GO:0005737, GO:0019079, GO:0043066, GO:0043154, GO:0071986	GO:0000323,GO:0001101,GO:0005575,GO:0005622,GO:0005623,GO:0005737,GO:0005764,GO:0005768,GO:0005770,GO:0005773,GO:0005829,GO:0006915,GO:0008104,GO:0008150,GO:0008219,GO:0008361,GO:0009607,GO:0009615,GO:0009719,GO:0009966,GO:0009967,GO:0009987,GO:0010008,GO:0010033,GO:0010243,GO:0010466,GO:0010646,GO:0010647,GO:0010941,GO:0010951,GO:0012501,GO:0016020,GO:0016032,GO:0016043,GO:0016265,GO:0019058,GO:…	NA	K16344	T	Signal transduction mechanisms	PF16672
pdam_00001366	-0.276046	-0.00505827	-0.265916	0.393262	0.993505	0.254504	NA	NA	NA	NA	unknown function	GO:0005515	NA	NA	NA	NA	NA	NA
pdam_00001368	-0.266623	0.24264	0.297889	0.580579	0.606063	0.356682	NA	NA	NA	NA	DEF6: Differentially expressed in FDCP 6 homolog (Homo sapiens)	NA	NA	NA	NA	NA	NA	PF00169
pdam_00001370	0.351481	0.929426	1.61051	0.338078	0.000649362	2.73874e-11	NA	Upregulated	Upregulated	SSUH2	SSUH2: Protein SSUH2 homolog (Homo sapiens)	GO:0031072, GO:0051082	GO:0005575,GO:0005622,GO:0005623,GO:0005737,GO:0044424,GO:0044464	NA	NA	O	Posttranslational modification, protein turnover, chaperones	NA
pdam_00001372	-0.214253	0.328355	0.694297	0.424776	0.151063	5.53728e-05	NA	NA	Upregulated	SSUH2	SSUH2: Protein SSUH2 homolog (Homo sapiens)	NA	GO:0005575,GO:0005622,GO:0005623,GO:0005737,GO:0044424,GO:0044464	NA	NA	O	Posttranslational modification, protein turnover, chaperones	NA
pdam_00001373	0.167556	0.121421	0.210035	0.40821	0.565356	0.135871	NA	NA	NA	TIMMDC1	TIMMDC1: Complex I assembly factor TIMMDC1%2C mitochondrial (Homo sapiens)	NA	GO:0005575,GO:0005622,GO:0005623,GO:0005737,GO:0005739,GO:0007275,GO:0008150,GO:0016020,GO:0032501,GO:0032502,GO:0043226,GO:0043227,GO:0043229,GO:0043231,GO:0044424,GO:0044444,GO:0044464,GO:0044699,GO:0044707	K23505	NA	O	Posttranslational modification, protein turnover, chaperones	PF02466
pdam_00001376	-0.246917	-0.056364	0.248551	0.172474	0.819168	0.0611613	NA	NA	NA	NDUFA12	NDUFA12: NADH dehydrogenase [ubiquinone] 1 alpha subcomplex subunit 12 (Bos taurus)	GO:0008137, GO:0009055, GO:0016020	GO:0003674,GO:0003824,GO:0003954,GO:0005488,GO:0005575,GO:0005622,GO:0005623,GO:0005737,GO:0005739,GO:0005740,GO:0005743,GO:0005746,GO:0005747,GO:0006091,GO:0006119,GO:0006120,GO:0006793,GO:0006796,GO:0006950,GO:0006979,GO:0007585,GO:0008137,GO:0008150,GO:0008152,GO:0009987,GO:0015980,GO:0016020,GO:0016310,GO:0016491,GO:0016651,GO:0016655,GO:0019866,GO:0022900,GO:0022904,GO:0030964,GO:0031090,GO:…	K11352	K11352,K14012,K18160	C	Energy production and conversion	PF05071
pdam_00001377	0.0609432	0.0713585	0.152065	0.72449	0.66463	0.144616	NA	NA	NA	ISY1	Isy1: Pre-mRNA-splicing factor ISY1 homolog (Rattus norvegicus)	GO:0000350	GO:0000003,GO:0000245,GO:0000350,GO:0000375,GO:0000377,GO:0000389,GO:0000393,GO:0000398,GO:0000974,GO:0002119,GO:0002164,GO:0003006,GO:0005575,GO:0005622,GO:0005623,GO:0005634,GO:0005681,GO:0005684,GO:0005737,GO:0005829,GO:0006139,GO:0006376,GO:0006396,GO:0006397,GO:0006725,GO:0006807,GO:0006928,GO:0007275,GO:0007276,GO:0007281,GO:0007548,GO:0008150,GO:0008152,GO:0008380,GO:0008406,GO:0009507,GO:…	K12870	K10352,K12870	A	RNA processing and modification	PF06246
pdam_00001378	0.361412	0.208207	0.327352	0.0757591	0.346068	0.0375905	NA	NA	Upregulated	DDX20	ddx20: Probable ATP-dependent RNA helicase DDX20 (Danio rerio)	GO:0003676, GO:0005524	GO:0000122,GO:0000244,GO:0000375,GO:0000377,GO:0000387,GO:0000398,GO:0003674,GO:0003724,GO:0003824,GO:0004004,GO:0004386,GO:0005575,GO:0005622,GO:0005623,GO:0005634,GO:0005654,GO:0005737,GO:0005829,GO:0005856,GO:0006139,GO:0006152,GO:0006163,GO:0006195,GO:0006200,GO:0006355,GO:0006357,GO:0006396,GO:0006397,GO:0006725,GO:0006753,GO:0006793,GO:0006796,GO:0006807,GO:0006810,GO:0006897,GO:0006898,GO:…	K13131	K02146,K12614,K13131	A	RNA processing and modification	PF00270, PF00271
pdam_00001380	-0.0559692	-0.0115302	-0.13694	0.757417	0.962472	0.215545	NA	NA	NA	NA	KCND1: Potassium voltage-gated channel subfamily D member 1 (Homo sapiens)	GO:0005216, GO:0005249, GO:0005515, GO:0006811, GO:0006813, GO:0008076, GO:0016020, GO:0051260, GO:0055085	NA	K10716	NA	P	Inorganic ion transport and metabolism	PF00520, PF02214
pdam_00001381	-0.452162	-0.273177	-0.625443	0.0294364	0.185319	0.000186607	Downregulated	NA	Downregulated	NA	Shal: Potassium voltage-gated channel protein Shal (Drosophila melanogaster)	GO:0005216, GO:0005249, GO:0005515, GO:0006811, GO:0006813, GO:0008076, GO:0016020, GO:0051260, GO:0055085	NA	NA	NA	P	Inorganic ion transport and metabolism	PF00520, PF02214
pdam_00001382	-0.144175	0.0549326	-0.468154	0.692356	0.898355	0.033776	NA	NA	Downregulated	NA	KCND1: Potassium voltage-gated channel subfamily D member 1 (Homo sapiens)	GO:0005216, GO:0005249, GO:0005515, GO:0006811, GO:0006813, GO:0008076, GO:0016020, GO:0051260, GO:0055085	NA	NA	NA	P	Inorganic ion transport and metabolism	PF00520, PF02214
pdam_00001384	-0.0385945	0.138708	0.273051	0.816472	0.261797	0.00238823	NA	NA	Upregulated	NA	unknown function	NA	NA	NA	NA	NA	NA	NA
pdam_00001386	-0.573843	-0.346871	-1.47386	0.133923	0.388806	1.91733e-07	NA	NA	Downregulated	NA	Grd: Gamma-aminobutyric acid receptor alpha-like (Drosophila melanogaster)	GO:0005216, GO:0005230, GO:0006811, GO:0016021	GO:0003674,GO:0005488,GO:0005575,GO:0005623,GO:0005886,GO:0005887,GO:0005892,GO:0006461,GO:0008144,GO:0008150,GO:0016020,GO:0016021,GO:0016043,GO:0022607,GO:0031224,GO:0031226,GO:0032991,GO:0034702,GO:0043234,GO:0043235,GO:0043933,GO:0044085,GO:0044425,GO:0044456,GO:0044459,GO:0044464,GO:0045202,GO:0045211,GO:0051259,GO:0051291,GO:0065003,GO:0070271,GO:0071822,GO:0071840,GO:0071944,GO:0097060	NA	NA	T	Signal transduction mechanisms	PF02931
pdam_00001387	-0.218646	-0.207422	-0.894256	0.5252	0.550297	4.00445e-05	NA	NA	Downregulated	NA	Glra3: Glycine receptor subunit alpha-3 (Rattus norvegicus)	GO:0005216, GO:0005230, GO:0006811, GO:0016021	GO:0003674,GO:0005488,GO:0005575,GO:0005623,GO:0005886,GO:0005887,GO:0005892,GO:0006461,GO:0008144,GO:0008150,GO:0016020,GO:0016021,GO:0016043,GO:0022607,GO:0031224,GO:0031226,GO:0032991,GO:0034702,GO:0043234,GO:0043235,GO:0043933,GO:0044085,GO:0044425,GO:0044456,GO:0044459,GO:0044464,GO:0045202,GO:0045211,GO:0051259,GO:0051291,GO:0065003,GO:0070271,GO:0071822,GO:0071840,GO:0071944,GO:0097060	NA	NA	T	Signal transduction mechanisms	PF02931, PF02932
pdam_00001390	-0.334299	0.210809	0.652707	0.30313	0.533403	0.00248768	NA	NA	Upregulated	LAMTOR5	v1g226489: Ragulator complex protein LAMTOR5 homolog (Nematostella vectensis)	GO:0005737, GO:0019079, GO:0043066, GO:0043154, GO:0071986	GO:0000323,GO:0001101,GO:0005575,GO:0005622,GO:0005623,GO:0005737,GO:0005764,GO:0005768,GO:0005770,GO:0005773,GO:0005829,GO:0006915,GO:0008104,GO:0008150,GO:0008219,GO:0008361,GO:0009607,GO:0009615,GO:0009719,GO:0009966,GO:0009967,GO:0009987,GO:0010008,GO:0010033,GO:0010243,GO:0010466,GO:0010646,GO:0010647,GO:0010941,GO:0010951,GO:0012501,GO:0016020,GO:0016032,GO:0016043,GO:0016265,GO:0019058,GO:…	K16344	K16344	T	Signal transduction mechanisms	PF16672
pdam_00001392	-0.620957	-0.496748	0.540205	0.230843	0.34219	0.157795	NA	NA	NA	CSMD1	Csmd1: CUB and sushi domain-containing protein 1 (Mus musculus)	NA	GO:0002165,GO:0003674,GO:0005488,GO:0005575,GO:0007275,GO:0007423,GO:0007444,GO:0007472,GO:0007476,GO:0007552,GO:0007560,GO:0008150,GO:0009653,GO:0009791,GO:0009886,GO:0009887,GO:0016020,GO:0030246,GO:0032501,GO:0032502,GO:0035107,GO:0035114,GO:0035120,GO:0035220,GO:0044699,GO:0044707,GO:0044767,GO:0048513,GO:0048563,GO:0048569,GO:0048707,GO:0048731,GO:0048736,GO:0048737,GO:0048856	NA	K17495	NA	NA	PF00431
pdam_00001400	-0.215867	-0.0689788	-0.103703	0.528909	0.873837	0.681162	NA	NA	NA	CNTN4	Nrg: Neuroglian (Drosophila melanogaster)	GO:0005515	GO:0000003,GO:0000902,GO:0000904,GO:0001508,GO:0003007,GO:0003008,GO:0005575,GO:0005576,GO:0005623,GO:0005886,GO:0005911,GO:0005918,GO:0005919,GO:0006928,GO:0006935,GO:0007043,GO:0007154,GO:0007155,GO:0007158,GO:0007163,GO:0007272,GO:0007275,GO:0007276,GO:0007292,GO:0007399,GO:0007409,GO:0007411,GO:0007413,GO:0007417,GO:0007420,GO:0007507,GO:0008037,GO:0008038,GO:0008150,GO:0008366,GO:0009605,GO:…	K06756	K06760,K06761,K06762	T	Signal transduction mechanisms	PF00041, PF07679, PF13927
pdam_00001401	-0.0168873	-0.0542518	0.108746	0.954971	0.844138	0.495251	NA	NA	NA	NISCH	Nisch: Nischarin (Mus musculus)	GO:0005515, GO:0035091	GO:0000322,GO:0000323,GO:0000324,GO:0000329,GO:0003008,GO:0003013,GO:0003674,GO:0004871,GO:0004872,GO:0004888,GO:0004930,GO:0005102,GO:0005178,GO:0005488,GO:0005515,GO:0005575,GO:0005622,GO:0005623,GO:0005634,GO:0005737,GO:0005768,GO:0005769,GO:0005773,GO:0005774,GO:0005829,GO:0005886,GO:0005975,GO:0005996,GO:0006006,GO:0006810,GO:0006996,GO:0007010,GO:0007154,GO:0007165,GO:0007166,GO:0007186,GO:…	NA	K02603	NA	NA	PF00787
pdam_00001402	-0.0704501	0.017121	-0.207875	0.874385	0.974621	0.42246	NA	NA	NA	SLC16A8	slc16a12: Monocarboxylate transporter 12 (Xenopus tropicalis)	GO:0016021, GO:0055085	GO:0002376,GO:0003674,GO:0005215,GO:0005342,GO:0005575,GO:0005623,GO:0005886,GO:0005887,GO:0006082,GO:0006090,GO:0006810,GO:0006811,GO:0006820,GO:0006928,GO:0006950,GO:0007596,GO:0007599,GO:0008028,GO:0008150,GO:0008152,GO:0008509,GO:0008514,GO:0009611,GO:0009925,GO:0009987,GO:0015075,GO:0015129,GO:0015291,GO:0015355,GO:0015711,GO:0015718,GO:0015727,GO:0015849,GO:0015850,GO:0016020,GO:0016021,GO:…	NA	K08185	G	Carbohydrate transport and metabolism	PF076903
pdam_00001403	-0.116513	0.442438	1.01313	0.742151	0.0820317	2.16864e-07	NA	NA	Upregulated	MSRB3	MSRB3: Methionine-R-sulfoxide reductase B3 (Pongo abelii)	GO:0006979, GO:0016671, GO:0030091, GO:0033743, GO:0055114	GO:0003674,GO:0003824,GO:0005488,GO:0005575,GO:0005622,GO:0005623,GO:0005737,GO:0005739,GO:0005783,GO:0006464,GO:0006950,GO:0006979,GO:0008150,GO:0008152,GO:0008270,GO:0009987,GO:0016491,GO:0016667,GO:0016671,GO:0018193,GO:0018206,GO:0019538,GO:0030091,GO:0033554,GO:0033743,GO:0034599,GO:0036211,GO:0042221,GO:0043167,GO:0043169,GO:0043170,GO:0043226,GO:0043227,GO:0043229,GO:0043231,GO:0043412,GO:…	K07305	K07305	O	Posttranslational modification, protein turnover, chaperones	PF01641
pdam_00001404	0.00220742	-0.622744	-2.22685	0.99647	0.069271	9.27038e-17	NA	NA	Downregulated	HMGA2	HMGA2: High mobility group protein HMGI-C (Homo sapiens)	GO:0000785, GO:0003677, GO:0005634, GO:0006355	GO:0000003,GO:0000075,GO:0000077,GO:0000122,GO:0000228,GO:0000785,GO:0000792,GO:0000902,GO:0000904,GO:0000975,GO:0000981,GO:0000982,GO:0001047,GO:0001067,GO:0001071,GO:0001077,GO:0001078,GO:0001227,GO:0001228,GO:0001501,GO:0001704,GO:0001706,GO:0001707,GO:0001837,GO:0002062,GO:0002791,GO:0003006,GO:0003131,GO:0003674,GO:0003676,GO:0003677,GO:0003680,GO:0003682,GO:0003700,GO:0003824,GO:0003906,GO:…	NA	K09283	K	Transcription	PF02178
pdam_00001405	0.271395	-0.099053	-0.044077	0.207555	0.705685	0.812535	NA	NA	NA	NA	unknown function	NA	NA	NA	NA	NA	NA	NA
pdam_00001406	0.0497013	-0.157228	-0.0021552	0.901951	0.643342	0.993127	NA	NA	NA	HEMK1	HEMK1: HemK methyltransferase family member 1 (Homo sapiens)	GO:0003676, GO:0006479, GO:0008168, GO:0008276, GO:0032259	GO:0003674,GO:0003824,GO:0004729,GO:0005575,GO:0005622,GO:0005623,GO:0005737,GO:0005739,GO:0006412,GO:0006414,GO:0006417,GO:0006451,GO:0006996,GO:0007005,GO:0008150,GO:0008152,GO:0008168,GO:0008757,GO:0009058,GO:0009059,GO:0009889,GO:0009987,GO:0010467,GO:0010468,GO:0010556,GO:0010608,GO:0016043,GO:0016491,GO:0016627,GO:0016634,GO:0016740,GO:0016741,GO:0019222,GO:0019538,GO:0031323,GO:0031326,GO:…	K02493	K02493	J	Translation, ribosomal structure and biogenesis	PF13847
pdam_00001407	0.00100856	0.0100845	0.0757603	0.99647	0.972272	0.584333	NA	NA	NA	NA	unknown function	NA	NA	NA	NA	NA	NA	NA
pdam_00001408	-0.0737819	-0.0997618	0.108168	0.79	0.712564	0.538263	NA	NA	NA	MLL5	SETD5: SET domain-containing protein 5 (Homo sapiens)	GO:0005515	GO:0000003,GO:0000118,GO:0000228,GO:0000785,GO:0000790,GO:0000975,GO:0000988,GO:0000989,GO:0001047,GO:0001067,GO:0001775,GO:0002252,GO:0002262,GO:0002274,GO:0002376,GO:0002443,GO:0002444,GO:0002446,GO:0002520,GO:0002682,GO:0002761,GO:0002763,GO:0003674,GO:0003676,GO:0003677,GO:0003712,GO:0003713,GO:0003824,GO:0005488,GO:0005515,GO:0005575,GO:0005622,GO:0005623,GO:0005634,GO:0005654,GO:0005694,GO:…	K23216	K07117,K09189	K	Transcription	PF00628, PF00856
pdam_00001411	0.532402	0.65342	0.988139	0.0975552	0.0222521	2.57728e-05	NA	Upregulated	Upregulated	NA	Slc16a13: Monocarboxylate transporter 13 (Mus musculus)	GO:0016021, GO:0055085	GO:0003674,GO:0005215,GO:0005342,GO:0006810,GO:0006811,GO:0006820,GO:0008028,GO:0008150,GO:0008509,GO:0008514,GO:0009987,GO:0015075,GO:0015711,GO:0015718,GO:0015849,GO:0022857,GO:0022891,GO:0022892,GO:0034220,GO:0044699,GO:0044763,GO:0044765,GO:0046942,GO:0046943,GO:0051179,GO:0051234,GO:0055085,GO:0071702	NA	NA	G	Carbohydrate transport and metabolism	PF076903
pdam_00001412	-0.102977	-0.0901988	-0.109597	0.881892	0.90199	0.794086	NA	NA	NA	SULT6B1	SULT1B1: Sulfotransferase family cytosolic 1B member 1 (Homo sapiens)	GO:0008146	GO:0005575,GO:0005622,GO:0005623,GO:0005737,GO:0044424,GO:0044464	NA	K01025	NA	NA	PF00685
pdam_00001415	0.125719	0.0997765	0.5309	0.505186	0.614362	7.9426e-06	NA	NA	Upregulated	SUCLG2	SUCLG2: Succinate--CoA ligase [GDP-forming] subunit beta%2C mitochondrial (Fragment) (Sus scrofa)	GO:0003824, GO:0004776, GO:0005524, GO:0006099, GO:0006104, GO:0008152	GO:0000166,GO:0001882,GO:0001883,GO:0003674,GO:0003824,GO:0004774,GO:0004776,GO:0004777,GO:0005488,GO:0005515,GO:0005575,GO:0005622,GO:0005623,GO:0005737,GO:0005739,GO:0005759,GO:0005811,GO:0006082,GO:0006091,GO:0006099,GO:0006104,GO:0006105,GO:0006637,GO:0006732,GO:0006793,GO:0007275,GO:0008150,GO:0008152,GO:0009060,GO:0009790,GO:0009792,GO:0009987,GO:0015980,GO:0016405,GO:0016491,GO:0016620,GO:…	K01900	K01900	C	Energy production and conversion	PF00549, PF08442
pdam_00001416	0.44437	0.123093	0.736069	0.0452636	0.671843	1.12664e-05	Upregulated	NA	Upregulated	C7ORF23	TMEM243: Transmembrane protein 243 (Homo sapiens)	NA	GO:0005575,GO:0016020	NA	NA	NA	NA	PF10856
pdam_00001417	0.227641	0.309163	0.648541	0.324395	0.133644	2.97093e-05	NA	NA	Upregulated	PSMD6	Psmd6: 26S proteasome non-ATPase regulatory subunit 6 (Mus musculus)	GO:0005515	GO:0000003,GO:0000070,GO:0000075,GO:0000077,GO:0000082,GO:0000084,GO:0000209,GO:0000278,GO:0000280,GO:0000502,GO:0000819,GO:0001654,GO:0002088,GO:0002119,GO:0002164,GO:0002376,GO:0002474,GO:0002478,GO:0002479,GO:0003674,GO:0003824,GO:0005198,GO:0005575,GO:0005622,GO:0005623,GO:0005634,GO:0005654,GO:0005737,GO:0005829,GO:0005838,GO:0005886,GO:0006139,GO:0006152,GO:0006163,GO:0006195,GO:0006200,GO:…	K03037	K03037	O	Posttranslational modification, protein turnover, chaperones	PF01399, PF10602
pdam_00001418	0.424148	0.00746269	0.392579	0.113854	0.988292	0.0534257	NA	NA	NA	MGLL	Mgll: Monoglyceride lipase (Rattus norvegicus)	NA	GO:0001676,GO:0001775,GO:0003674,GO:0003824,GO:0004620,GO:0004622,GO:0005488,GO:0005575,GO:0005622,GO:0005623,GO:0005737,GO:0005739,GO:0005740,GO:0005741,GO:0005783,GO:0005789,GO:0005811,GO:0005886,GO:0006082,GO:0006629,GO:0006631,GO:0006638,GO:0006639,GO:0006641,GO:0006644,GO:0006650,GO:0006690,GO:0006793,GO:0006796,GO:0006950,GO:0006952,GO:0006954,GO:0007596,GO:0007599,GO:0008150,GO:0008152,GO:…	K01054	K01054	I	Lipid transport and metabolism	PF12146
pdam_00001419	0.242473	0.0101295	0.277263	0.226216	0.976342	0.0548489	NA	NA	NA	NA	HEXB: Beta-hexosaminidase subunit beta (Homo sapiens)	GO:0004553, GO:0004563, GO:0005975	NA	NA	NA	G	Carbohydrate transport and metabolism	PF00728
pdam_00001420	-0.158641	-0.0970433	-0.0891043	0.162511	0.420484	0.315295	NA	NA	NA	BCAP31	BCAP31: B-cell receptor-associated protein 31 (Homo sapiens)	GO:0005783, GO:0006886, GO:0016021	GO:0000003,GO:0000139,GO:0002376,GO:0002474,GO:0003674,GO:0005102,GO:0005488,GO:0005515,GO:0005575,GO:0005622,GO:0005623,GO:0005737,GO:0005773,GO:0005774,GO:0005783,GO:0005789,GO:0005793,GO:0005794,GO:0005811,GO:0005829,GO:0005886,GO:0005887,GO:0005911,GO:0006810,GO:0006873,GO:0006874,GO:0006875,GO:0006888,GO:0006915,GO:0006921,GO:0006950,GO:0006955,GO:0007154,GO:0007165,GO:0007204,GO:0007276,GO:…	K14009	K08517,K14009	U	Intracellular trafficking, secretion, and vesicular transport	PF05529
pdam_00001424	0.263307	0.0133318	-0.125226	0.409035	0.979549	0.606112	NA	NA	NA	STRIP2	Strip1: Striatin-interacting protein 1 (Mus musculus)	NA	GO:0000003,GO:0000320,GO:0000321,GO:0000322,GO:0000323,GO:0000324,GO:0000746,GO:0000747,GO:0000749,GO:0000754,GO:0000922,GO:0005575,GO:0005622,GO:0005623,GO:0005634,GO:0005635,GO:0005737,GO:0005773,GO:0005783,GO:0005815,GO:0005816,GO:0005819,GO:0005856,GO:0006928,GO:0006996,GO:0007010,GO:0007049,GO:0007275,GO:0008150,GO:0008360,GO:0009790,GO:0009792,GO:0009966,GO:0009968,GO:0009987,GO:0010033,GO:…	NA	NA	NA	NA	PF07923, PF11882
pdam_00001426	0.600831	0.387364	1.1786	0.258964	0.503733	0.00143182	NA	NA	Upregulated	ALAS1	Alas1: 5-aminolevulinate synthase%2C nonspecific%2C mitochondrial (Rattus norvegicus)	GO:0003824, GO:0003870, GO:0005759, GO:0006778, GO:0008152, GO:0009058, GO:0016740, GO:0030170, GO:0033014	GO:0000003,GO:0001666,GO:0002262,GO:0002376,GO:0002520,GO:0003674,GO:0003824,GO:0003870,GO:0005488,GO:0005575,GO:0005622,GO:0005623,GO:0005634,GO:0005737,GO:0005739,GO:0005740,GO:0005743,GO:0005759,GO:0005829,GO:0006629,GO:0006725,GO:0006778,GO:0006779,GO:0006783,GO:0006807,GO:0006810,GO:0006873,GO:0006875,GO:0006879,GO:0006950,GO:0007275,GO:0007565,GO:0007589,GO:0007595,GO:0008150,GO:0008152,GO:…	K00643	K00639,K00643,K00652	H	Coenzyme transport and metabolism	PF00155, PF09029
pdam_00001428	0.0259991	-0.0148051	0.113333	0.902762	0.950564	0.336903	NA	NA	NA	NA	BTN1: Protein BTN1 (Yarrowia lipolytica (strain CLIB 122 / E 150))	GO:0016020	NA	NA	K12389	I	Lipid transport and metabolism	PF02487
pdam_00001430	-0.344297	-0.158298	-0.70306	0.24266	0.642977	0.000628966	NA	NA	Downregulated	CPB2	CPA2: Carboxypeptidase A2 (Homo sapiens)	GO:0004180, GO:0004181, GO:0006508, GO:0008270	GO:0000322,GO:0000323,GO:0000324,GO:0001990,GO:0001991,GO:0002002,GO:0003008,GO:0003013,GO:0003044,GO:0003073,GO:0003081,GO:0003674,GO:0003824,GO:0004175,GO:0004180,GO:0004181,GO:0004222,GO:0005488,GO:0005575,GO:0005576,GO:0005578,GO:0005615,GO:0005622,GO:0005623,GO:0005737,GO:0005773,GO:0005783,GO:0006325,GO:0006464,GO:0006473,GO:0006475,GO:0006508,GO:0006950,GO:0006996,GO:0007039,GO:0008015,GO:…	K01298	K01291,K01298,K01300,K08637,K08779,K08780,K08781,K08782,K08783	E	Amino acid transport and metabolism	PF00246, PF02244
pdam_00001431	-0.24085	-0.144542	-0.273081	0.446815	0.666627	0.222538	NA	NA	NA	SMPDL3B	Nptx2: Neuronal pentraxin-2 (Rattus norvegicus)	NA	GO:0003674,GO:0003824,GO:0004620,GO:0004767,GO:0005575,GO:0005576,GO:0005622,GO:0005623,GO:0005737,GO:0005773,GO:0005774,GO:0008081,GO:0008150,GO:0008152,GO:0016020,GO:0016298,GO:0016787,GO:0016788,GO:0031090,GO:0042578,GO:0043226,GO:0043227,GO:0043229,GO:0043231,GO:0044422,GO:0044424,GO:0044437,GO:0044444,GO:0044446,GO:0044464	NA	K01128,K04794,K06018	I	Lipid transport and metabolism	PF00354
pdam_00001432	-0.488578	-0.429051	-0.232153	0.113854	0.143734	0.344932	NA	NA	NA	CPB2	CPA2: Carboxypeptidase A2 (Homo sapiens)	GO:0004180, GO:0004181, GO:0006508, GO:0008270	GO:0000322,GO:0000323,GO:0000324,GO:0001990,GO:0001991,GO:0002002,GO:0003008,GO:0003013,GO:0003044,GO:0003073,GO:0003081,GO:0003674,GO:0003824,GO:0004175,GO:0004180,GO:0004181,GO:0004222,GO:0005488,GO:0005575,GO:0005576,GO:0005578,GO:0005615,GO:0005622,GO:0005623,GO:0005737,GO:0005773,GO:0005783,GO:0006325,GO:0006464,GO:0006473,GO:0006475,GO:0006508,GO:0006950,GO:0006996,GO:0007039,GO:0008015,GO:…	NA	K01291,K01298,K01300,K08637,K08779,K08780,K08781,K08782,K08783	E	Amino acid transport and metabolism	PF00246, PF02244
pdam_00001433	0.0566966	0.186474	0.466756	0.849611	0.425085	0.0030528	NA	NA	Upregulated	CPB2	Cpa2: Carboxypeptidase A2 (Mus musculus)	GO:0004180, GO:0004181, GO:0006508, GO:0008270	GO:0000322,GO:0000323,GO:0000324,GO:0001990,GO:0001991,GO:0002002,GO:0003008,GO:0003013,GO:0003044,GO:0003073,GO:0003081,GO:0003674,GO:0003824,GO:0004175,GO:0004180,GO:0004181,GO:0004222,GO:0005488,GO:0005575,GO:0005576,GO:0005578,GO:0005615,GO:0005622,GO:0005623,GO:0005737,GO:0005773,GO:0005783,GO:0006325,GO:0006464,GO:0006473,GO:0006475,GO:0006508,GO:0006950,GO:0006996,GO:0007039,GO:0008015,GO:…	NA	K01291,K01298,K01300,K08637,K08779,K08780,K08781,K08782,K08783	E	Amino acid transport and metabolism	PF00246, PF02244
pdam_00001434	-0.416382	-0.298003	-0.416877	0.342514	0.521789	0.190122	NA	NA	NA	NA	unknown function	NA	NA	NA	NA	NA	NA	NA
pdam_00001436	0.200689	-0.129572	-0.0324602	0.31229	0.550606	0.842271	NA	NA	NA	SHQ1	SHQ1: Protein SHQ1 homolog (Homo sapiens)	NA	GO:0000491,GO:0000493,GO:0003674,GO:0005488,GO:0005515,GO:0005575,GO:0005622,GO:0005623,GO:0005634,GO:0005654,GO:0005730,GO:0005737,GO:0005829,GO:0006139,GO:0006364,GO:0006396,GO:0006725,GO:0006807,GO:0008150,GO:0008152,GO:0009892,GO:0009987,GO:0010467,GO:0010468,GO:0010605,GO:0010941,GO:0010942,GO:0016043,GO:0016070,GO:0016072,GO:0019219,GO:0019222,GO:0022607,GO:0022613,GO:0022618,GO:0031323,GO:…	K14764	K08597,K14546,K14764	O	Posttranslational modification, protein turnover, chaperones	NA
pdam_00001437	-1.822	-1.35762	-2.55424	0.000363336	0.00945579	8.60282e-09	Downregulated	Downregulated	Downregulated	ABP1	AOC1: Amiloride-sensitive amine oxidase [copper-containing] (Sus scrofa)	GO:0005507, GO:0008131, GO:0009308, GO:0048038, GO:0055114	GO:0002376,GO:0002523,GO:0002673,GO:0002675,GO:0002682,GO:0002684,GO:0002685,GO:0002687,GO:0003008,GO:0003013,GO:0003674,GO:0003824,GO:0004346,GO:0004872,GO:0005215,GO:0005216,GO:0005261,GO:0005272,GO:0005488,GO:0005507,GO:0005509,GO:0005515,GO:0005539,GO:0005575,GO:0005576,GO:0005615,GO:0005618,GO:0005622,GO:0005623,GO:0005634,GO:0005737,GO:0005768,GO:0005773,GO:0005777,GO:0005783,GO:0005789,GO:…	NA	K00276,K06698,K11182	Q	Secondary metabolites biosynthesis, transport and catabolism	PF01179, PF02727, PF09248
pdam_00001438	0.127959	-0.148396	0.152151	0.693512	0.637735	0.472703	NA	NA	NA	NRCAM	Fibronectin type III domain-containing protein (Acropora millepora)	GO:0005515	GO:0000132,GO:0000226,GO:0000278,GO:0000902,GO:0000904,GO:0001508,GO:0001525,GO:0001558,GO:0001568,GO:0001667,GO:0001764,GO:0001871,GO:0001944,GO:0002064,GO:0002175,GO:0002376,GO:0003008,GO:0003381,GO:0003382,GO:0003383,GO:0003384,GO:0003674,GO:0004871,GO:0004872,GO:0004888,GO:0005102,GO:0005178,GO:0005488,GO:0005515,GO:0005575,GO:0005576,GO:0005578,GO:0005622,GO:0005623,GO:0005737,GO:0005768,GO:…	NA	K06550,K06756,K06757,K06758	T	Signal transduction mechanisms	PF00041, PF13882, PF13927
pdam_00001439	-0.6673	-0.863233	-1.57	0.174803	0.0481243	6.20492e-06	NA	Downregulated	Downregulated	NRCAM	Fibronectin type III domain-containing protein (Acropora millepora)	GO:0005515	GO:0000132,GO:0000226,GO:0000278,GO:0000902,GO:0000904,GO:0001508,GO:0001525,GO:0001558,GO:0001568,GO:0001667,GO:0001764,GO:0001871,GO:0001944,GO:0002064,GO:0002175,GO:0002376,GO:0003008,GO:0003381,GO:0003382,GO:0003383,GO:0003384,GO:0003674,GO:0004871,GO:0004872,GO:0004888,GO:0005102,GO:0005178,GO:0005488,GO:0005515,GO:0005575,GO:0005576,GO:0005578,GO:0005622,GO:0005623,GO:0005737,GO:0005768,GO:…	NA	K06550,K06756,K06757,K06758	T	Signal transduction mechanisms	PF00041, PF07679, PF13882, PF13927
[truncated: 12,033 more rows]

## Sheet: Table_S4B_DEGs_symbiont
Supplementary Table 3B: Cladocopium DESeq2 all-genotypes model results summary table
ID	log2FoldChange_Heat_control	log2FoldChange_Antibiotics_control	log2FoldChange_Antibiotics.Heat_control	padj_Heat_control	padj_Antibiotics_control	padj_Antibiotics.Heat_control	DE_Heat	DE_Antibiotics	DE_Antibiotics.Heat	Gene_Name	UniProt_BestHit	Gene_Info	E.value	GO_Terms_C1	GO_Terms_EM	KO_Terms_C1	KO_Terms_EM	Pfam_Domains	KOG_Class	KOG_Class_A
[truncated: 9,818 more rows]

## Sheet: Table_S5_DE_GO_terms
Supplementary Table 4: DESeq2 GO_MWU results table
holobiont_partner	contrast	DEG_set	ontology	pval	p.adj	term	name	level	nseqs
[truncated: 563 more rows]

## Sheet: Table_S6A_coral_module_KOG
Supplementary Table 5A: Pocillopora WGCNA KOGMWU enrichment results adjusted p-values table
[truncated: 24 more rows]

[truncated: 3 more sheets: Table_S6B_symbiont_module_KOG, Table_S7A_coral_module_GO, Table_S7B_symbiont_module_GO]
